# Supplementary material for: Sleep habits and strategies of ultramarathon runners
Source: PLoS One. 2018 May 9;13(5):e0194705. doi: 10.1371/journal.pone.0194705 (PMC5942705; doi:10.1371/journal.pone.0194705)
Supplement: S1 File — (XLSX) [file pone.0194705.s001.xlsx]

## Sheet: Answers
	Gender	Height	Weight	Age	When do you usually work?	When do you usually train?	During normal training, how many hours a week do you train?	During periods of intense training, how many hours a week do you train?	How many ultra-trail (> 80 km or 50 miles) races do you participate in every year?	What are your best results in ultra-trail running?	How many hours a day are you in front of a device with a computer-type screen for NON-professional reasons?	Until what time do you usually use TV or a device with a computer-type screen for NON-professional reasons?	Do you have a TV in your bedroom?	When is the last time you changed your mattress?	Have you ever visited a physician for a sleep problem?	Do you have trouble falling asleep or do you wake during the night?	Do you usually take medicine to sleep?	If so, which drugs do you take?	Which methods do you use to fall asleep?	How many cigarettes do you smoke per day?	How many cups of coffee do you drink per day?	How many cups of tea do you drink per day?	How many glasses of Coke (or Pepsi) do you drink per day?	How many glasses of alcohol do you drink per day?	How many hours do you sleep per night during the week when you work?	How many hours do you sleep per night during the week-end when you work during the week?	How many hours do you sleep per night when you are on vacation?	Do you take a nap when you do not train and you work during the day?	If not, why not?	If so, what is its average duration?	Do you take a nap when you do not train and you do not work?	If not, why not?	If so, what is its average duration?	Do you take a nap when you train normally and you work during the day?	If not, why not?	If so, what is its average duration?	Do you take a nap when you train normally and you don't twork?	If not, why not?	If so, what is its average duration?	Do you take a nap when you train a lot and you work during the day?	If not, why?	If so, what is its average duration?	Do you take a nap when you train a lot and you don't work?	If not, why not?	If so, what is its average duration?	Have you performed an overnight ultra-trail?	If so, did you sleep?	If so, how and when?	Have you performed an ultra-trail comprising 2 nights of racing?
2013-10-10 12:05:58	1	175	74	18- 29	Le jour (entre 7H et 20H)	L'après-midi (14H-18H)	3 à 6 h	6 à 9 h	1	trans aubrac 2013 105km 95eme sur 122 en 18h35m	Entre 2 et 3h	22h	Non	3	Non	Non	Non			0	0	0	0	0	Entre 6 et 7	> 10	Entre 9 et 10	Oui		40 minutes	Non	Je n'en ressens pas le besoin		Oui		40 minutes	Non	Je n'en ressens pas le besoin		Oui		40 minutes	Non	Je n'en ressens pas le besoin		Non			Non
2013-10-10 14:16:40	1	178	70	50- 59	Le jour (entre 7H et 20H)	Avant 7H, Le matin (7H-12H), En début de soirée (18H-20H)	3 à 6 h	6 à 9 h	0	2008 finisher CCC	Entre 1 et 2h	22h	Non	10	Non	Non	Non			0	4	0	0	1	Entre 8 et 9	Entre 8 et 9	Entre 8 et 9	Non	Je n'ai pas la possibilité matérielle de la faire		Oui		30 minutes	Non	Je n'ai pas la possibilité matérielle de la faire		Oui		30 minutes	Non	Je n'ai pas la possibilité matérielle de la faire		Oui		30 minutes	Oui	Non		Non
2013-10-10 14:23:32	1	177	65	40-49	Le jour (entre 7H et 20H)	Le matin (7H-12H), En début de soirée (18H-20H)	3 à 6 h	6 à 9 h	1	UTB 2011 : 17h39' Diagonale des fous 2011 : 39h59' UT4M 2013 : 39h51'	< 1	22h	Non	3	Non	Non	Non			0	1	0	0	0	Entre 6 et 7	Entre 7 et 8	Entre 7 et 8	Oui		20'	Non	Je n'en ressens pas le besoin		Oui		20'	Non	Je n'en ressens pas le besoin		Oui		20'	Non	Je n'en ressens pas le besoin		Oui	Oui	UT4M (39h51') 30' de sommeil dans un lit pliant sur un ravitaillement (Chamrousse)	Oui
2013-10-11 01:07:17	1	161	60	50- 59	Le jour (entre 7H et 20H)	Entre 12H et 14H, L'après-midi (14H-18H)	3 à 6 h	9 à 12 h	3	136h sur TOR des géants 2012 42h sur l'UTMB	< 1	22h	Non	5	Non	Oui	Non		lire un livre	0	3	0	0	0	Entre 7 et 8	Entre 7 et 8	Entre 7 et 8	Oui		10mn	Oui			Oui			Oui			Oui		10mn	Oui		10mn	Oui	Non		Oui
2013-10-11 07:36:03	1	180	61	30-39	Le jour (entre 7H et 20H)	Cela varie chaque jour	Moins de 3 h	3 à 6 h	5 et +	9ème Tor des Géants 2010 1er MilKil 2008, 2009, 2012; No Finish Line 2008 (pas du trail) 1er Trail' Oise 2012 (60km)	< 1	je ne regarde jamais d'écran	Non	2	Non	Non	Non			0	0	0	0	0	Entre 5 et 6	Entre 8 et 9	Entre 8 et 9	Non	Je n'ai pas le temps		Non	Je n'ai pas le temps		Non	Je n'ai pas le temps		Non	Je n'ai pas le temps		Non	Je n'ai pas le temps		Non	Je n'ai pas le temps		Oui	Non		Oui
2013-10-11 10:50:33	1	176	69	30-39	Le jour (entre 7H et 20H)	Le matin (7H-12H), En début de soirée (18H-20H), Cela varie chaque jour	3 à 6 h	3 à 6 h	1	50/500 en 2012	< 1	plus tard que minuit	Non	2012	Non	Non	Non			0	1	0	0	0	Entre 6 et 7	Entre 6 et 7	Entre 6 et 7	Non	enfants		Non	Je n'ai pas la possibilité matérielle de la faire		Non	Je n'ai pas la possibilité matérielle de la faire		Non	Je n'ai pas la possibilité matérielle de la faire		Non	Je n'ai pas la possibilité matérielle de la faire		Non	Je n'ai pas la possibilité matérielle de la faire		Non			Non
2013-10-12 01:31:07	1	183	74	30-39	Le jour (entre 7H et 20H)	Le matin (7H-12H), Entre 12H et 14H, En début de soirée (18H-20H)	6 à 9 h	12 à 15 h	2	FINISHER GRAND RAID DE LA REUNION 2012 FINISHER UTB 2013 parmi les 20 % des derniers arrivants sur les deux épreuves	Entre 2 et 3h	22h	Non	4	Non	Non	Non			0	3	0	0	2	Entre 7 et 8	Entre 8 et 9	Entre 8 et 9	Non	Je n'en ressens pas le besoin		Non	Je n'en ressens pas le besoin	15 MIN	Non	Je n'en ressens pas le besoin		Non	Je n'en ressens pas le besoin		Non	Je n'en ressens pas le besoin		Non	Je n'en ressens pas le besoin		Oui	Oui	Pas dormi sur l'utb avec 26 heures de course 3 nuits dehors avec le grand raid de la réunion. Dormi environ 1 h par nuit	Non
2013-10-12 08:35:44	1	181	72	50- 59	Le jour (entre 7H et 20H)	L'après-midi (14H-18H), En début de soirée (18H-20H), Le soir (après 20H)	3 à 6 h	3 à 6 h	2	TDS en 2011 UTMB en 2013 (arr^té à Vallorcine après 150 km) 4 écotrails de Paris 2011 2012 2013 2010 trail de Gérardmer en 2011 2012 2013	Entre 1 et 2h	23h	Non	2 ans	Oui	Oui	Oui	Stilnox	Somnifère ou relaxation	0	4	2	1	0	Entre 7 et 8	Entre 8 et 9	Entre 8 et 9	Non	Je n'ai pas le temps		Oui		1h	Non			Oui	Je n'ai pas le temps	1h	Non	Je n'ai pas le temps		Oui		1h30	Oui	Non		Oui
2013-10-13 07:45:43	1	171	67	50- 59	Le jour (entre 7H et 20H)	Le matin (7H-12H), En début de soirée (18H-20H), Le soir (après 20H)	Moins de 3 h	3 à 6 h	1	diagonale des fous 2005, 43h30 UTMB 2007 42h30 100kms du Verdon, 2011, 24h Solu Khumbu Trail 2012; 55h	Entre 1 et 2h	23h	Non	3	Oui	Oui	Oui	lexomil ou même style mais très OCCASIONNELLEMENT		0	6	0	0	0	Entre 5 et 6	Entre 5 et 6	Entre 5 et 6	Non	Je n'en ressens pas le besoin		Non	Je n'en ressens pas le besoin		Non	Je n'en ressens pas le besoin		Non	Je n'en ressens pas le besoin		Non	Je n'en ressens pas le besoin		Non	Je n'en ressens pas le besoin		Oui	Oui	Diagonale des Fous 2005: quelques moments de repos allongé, mais sans dormir (environ 15 à 30mn à chaque fois) 4 fois 2h de bon sommeil à Cilaos temps de course: 43h30	Oui
2013-10-13 10:49:56	2	172	63	40-49	Le jour (entre 7H et 20H)	L'après-midi (14H-18H)	9 à 12 h	Plus de 15 h	2	translorraine 2007 CCC 2009 Transaq 2010 Ultratransaubrac 2012 Infernal trail des vosges 2013	Entre 1 et 2h	21h	Oui	7	Oui	Oui	Oui	xanax stilnox	tout preparer pour le lendemain se coucher tous les jours a la meme heure lire, écouter la radio ou regarder une série "calme" avant de chercher le sommeil	1	1	1	2	0,3	Entre 9 et 10	Entre 8 et 9	Entre 9 et 10	Non	Je n'ai pas la possibilité matérielle de la faire		Non	Je n'ai pas le temps		Non			Non	Je n'ai pas le temps		Non	Je n'ai pas la possibilité matérielle de la faire		Oui	je me repose mais ne dors pas		Oui	Non		Oui
2013-10-13 11:25:08	1	175	70	50- 59	Posté	Le matin (7H-12H)	3 à 6 h	9 à 12 h	1	23h15 a la ccc	Entre 1 et 2h	22h	Non	2	Non	Non	Non		lecture	0	3	0	0	2	Entre 7 et 8	Entre 7 et 8	Entre 7 et 8	Oui		1h	Non	Je n'en ressens pas le besoin		Oui		1h	Non	Je n'en ressens pas le besoin		Oui		1h	Oui		1h	Oui	Non		Non
2013-10-14 09:30:19	1	172	65	18- 29	Le jour (entre 7H et 20H)	Cela varie chaque jour	3 à 6 h	9 à 12 h	3	Aravis trail 2013 : 9h54 sur 66km/+5000 Tour du haut val montjoie 2013 : 6h30 pour 52km/+3200 TDS 2012 : 25h25 pour 116km/+7500	Entre 1 et 2h	Minuit	Non	1	Non	Non	Non			0	0	1	0	0	Entre 7 et 8	Entre 8 et 9	Entre 8 et 9	Non	Je n'en ressens pas le besoin		Non	Je n'en ressens pas le besoin		Non	Je n'en ressens pas le besoin		Non	Je n'en ressens pas le besoin		Non	Je n'en ressens pas le besoin		Non	Je n'en ressens pas le besoin		Oui	Non		Non
2013-10-14 09:57:25	1	185	67	30-39	Le jour (entre 7H et 20H)	L'après-midi (14H-18H), Le soir (après 20H)	6 à 9 h	12 à 15 h	1	2007 : finisher UTMB : 821 éme 2011 : CCC : 400éme 2012 : UTTJ temps ??? 2013 : UTTJ??? 2013 : utmb finisher 721 éme plus des trail type sainté lyon 6000D .... mais la je sais plus les dates	Entre 1 et 2h	22h	Non	2007	Non	Non	Non			non fumeur	3	0	0	0	Entre 6 et 7	Entre 8 et 9	Entre 9 et 10	Non	Je n'ai pas la possibilité matérielle de la faire		Oui		45 minutes	Non	Je n'ai pas la possibilité matérielle de la faire		Oui		1h	Non	Je n'ai pas la possibilité matérielle de la faire		Oui		1h	Oui	Non		Oui
2013-10-14 14:01:12	1	172	62	30-39	Le jour (entre 7H et 20H)	Le matin (7H-12H), En début de soirée (18H-20H)	3 à 6 h	6 à 9 h	1	151ème TDS 2011 20ème Raid du golf du Morbihan 2012	Entre 1 et 2h	22h	Non	3	Non	Non	Non			0	3	2	0	0	Entre 7 et 8	Entre 8 et 9	Entre 8 et 9	Oui		20 minutes	Non	Je n'en ressens pas le besoin		Oui		20 minutes	Non	Je n'en ressens pas le besoin		Oui		20 minutes	Non	Je n'en ressens pas le besoin		Oui	Non		Non
2013-10-15 06:00:58	1	178	65	30-39	Le jour (entre 7H et 20H)	Le matin (7H-12H), Entre 12H et 14H, En début de soirée (18H-20H)	9 à 12 h	Plus de 15 h	4	2013, 32è à L'échappée belle 2012, 37è au Grand Raid des Pyrénées 2011, 29è à l'ultra trail du Vercors	Entre 2 et 3h	22h	Oui	5	Non	Non	Non			0	4	0	0	2	Entre 7 et 8	Entre 6 et 7	Entre 6 et 7	Non	Je n'en ressens pas le besoin		Non	Je n'en ressens pas le besoin		Non	Je n'ai pas le temps		Non	Je n'en ressens pas le besoin		Non	Je n'ai pas le temps		Oui		1/2 h	Oui	Non		Non
2013-10-16 10:36:06	1	173	67	30-39	Le jour (entre 7H et 20H)	Entre 12H et 14H, En début de soirée (18H-20H)	6 à 9 h	9 à 12 h	1	1 er endurance trail 2009 et 2010 5ème UTMB 2011 2ème TDS 2010 Tu m'as reconnu ?	< 1	21h	Non	13	Non	Non	Non			0	0	0	0	0	Entre 8 et 9	Entre 8 et 9	Entre 8 et 9	Non	Je n'ai pas le temps		Non	Je n'ai pas le temps		Non	Je n'ai pas le temps		Non	Je n'ai pas le temps		Non	Je n'ai pas le temps		Non	Je n'ai pas le temps		Oui	Non		Non
2013-10-17 08:43:53	1	179	78	30-39	Le jour (entre 7H et 20H)	Entre 12H et 14H, En début de soirée (18H-20H)	9 à 12 h	Plus de 15 h	4	UTMB 2012 9eme GRP 2010 160km 3eme ultra mitic 2012 ultra initiatic 2010 celestrail 2011 1er 6666 occitane 2012 1er	Entre 2 et 3h	22h	Non	7	Non	Oui	Non			0	3	0	0	0	Entre 8 et 9	Entre 9 et 10	Entre 8 et 9	Oui		40min	Oui		40min	Non	Je n'ai pas le temps		Oui		40min	Oui		1h	Oui		1h	Oui	Non		Non
2013-10-18 22:26:02	1	182	79	30-39	Le jour (entre 7H et 20H)	Avant 7H, Entre 12H et 14H, En début de soirée (18H-20H)	3 à 6 h	9 à 12 h	1	46h diagonale des fous 2010 40h diagonale des fous 2012	Entre 1 et 2h	22h	Non	4	Non	Non	Non			0	0	0.5	0.3	1	Entre 6 et 7	Entre 5 et 6	Entre 7 et 8	Non	Je n'ai pas le temps		Non	Je n'ai pas le temps		Non	Je n'ai pas le temps		Non	Je n'ai pas le temps		Non	Je n'ai pas le temps		Non	Je n'ai pas le temps		Non	Non		Oui
2013-10-21 11:41:18	1	166	55	50- 59	Le jour (entre 7H et 20H)	Le matin (7H-12H)	9 à 12 h	Plus de 15 h	4	Toujours dans le 1er tiers du classement.	< 1	21h	Non	2	Non	Non	Non			0	0	8 à 10	0	0	Entre 7 et 8	Entre 7 et 8	Entre 7 et 8	Oui		15 minutes	Oui		15 minutes	Oui		15 minutes	Oui		15 minutes	Oui		30 minutes	Oui		30 minutes	Oui	Non		Non
2013-10-23 05:26:14	1	179	70	30-39	Le jour (entre 7H et 20H)	Le matin (7H-12H), Entre 12H et 14H	6 à 9 h	12 à 15 h	4	2013 Tor des Géants - 120h 2012 PTL - 140h 2011, 2010, 2009 UTMB - 38h 2008, 2010 GRR - 39h	< 1	23h	Non	3	Non	Oui	Non			0	4	0	1	0	Entre 5 et 6	Entre 6 et 7	Entre 6 et 7	Non	Je n'ai pas le temps		Oui		2	Non	Je n'ai pas le temps		Oui		2	Non	Je n'ai pas le temps		Oui		2	Oui	Non		Oui
2013-10-23 14:45:29	1	179	80	30-39	Posté	Le matin (7H-12H), Entre 12H et 14H	6 à 9 h	Moins de 3 h	3	ccc 75 eme en 2010 utpma 21 eme en2013 utmb 210 eme 2012	< 1	jamais après 20h	Oui	3	Non	Oui	Non			0	0	2	0	0	< 5	Entre 7 et 8	Entre 8 et 9	Oui		20 minutes	Oui		1 heure	Oui		1h 30	Oui		1 heure	Oui		1 heure30	Oui		2 heure	Oui	Non		Non
2013-10-24 07:40:17	1	182	81	50- 59	Le jour (entre 7H et 20H)	Cela varie chaque jour	3 à 6 h	9 à 12 h	2	raid du ventoux 1989 raid du verdon2002 raid de l atlas 2008 grand raid 2009 marathon sables 2012 verbier 2012	< 1	je ne regarde jamais d'écran	Non	3	Non	Oui	Non			0	1	0	0	0	Entre 6 et 7	Entre 6 et 7	Entre 6 et 7	Non	Je n'ai pas la possibilité matérielle de la faire		Oui		40 mn	Non	Je n'ai pas la possibilité matérielle de la faire		Oui		40 mn	Non	Je n'ai pas la possibilité matérielle de la faire		Oui		40 mn	Oui	Oui	mal dormi , sans doute pas assez sur UTMB 30 mn 2 arrets dans des zones aménagées pour le grand raid 2h	Oui
2013-10-24 12:31:42	1	176	69	40-49	Le jour (entre 7H et 20H)	Le matin (7H-12H), Le soir (après 20H)	3 à 6 h	12 à 15 h	4	2013 243e (99e catégorie) éco trail 2013 40e Montagn'hard 2013 ~300e 6000D	Entre 2 et 3h	Minuit	Non	1	Non	Oui	Non		Assouplissements / Yoga Tisane / douche	0	0	2	0	0	Entre 6 et 7	Entre 6 et 7	Entre 7 et 8	Non	Je n'ai pas la possibilité matérielle de la faire		Non	Je n'en ressens pas le besoin		Non	Je n'ai pas la possibilité matérielle de la faire		Non	Je ne m'en sens pas le droit		Non	Je n'ai pas la possibilité matérielle de la faire		Non	Je ne m'en sens pas le droit		Oui	Non		Non
2013-10-24 14:44:20	2	157	53	40-49	Le jour (entre 7H et 20H)	Cela varie chaque jour	3 à 6 h	6 à 9 h	2	CCC 25h 2013	< 1	jamais après 20h	Non	3	Non	Non	Non			0	3	0	0	0	Entre 7 et 8	Entre 7 et 8	Entre 7 et 8	Non	Je n'ai pas le temps		Oui		20 minutes	Non	Je n'ai pas le temps		Oui		20 minutes	Non	Je n'ai pas le temps		Oui		20 minutes	Oui	Non		Non
2013-10-24 15:17:15	1	171	69	40-49	Le jour (entre 7H et 20H)	Le matin (7H-12H), En début de soirée (18H-20H)	6 à 9 h	Plus de 15 h	3	cote d'opale 2012	Entre 2 et 3h	22h	Oui	10	Non	Non	Non			0	0	0	2	0	Entre 6 et 7	Entre 7 et 8	Entre 7 et 8	Non	Je n'en ressens pas le besoin		Non	Je n'en ressens pas le besoin		Non	Je n'en ressens pas le besoin		Non	Je n'en ressens pas le besoin		Non	Je n'en ressens pas le besoin		Non	Je n'en ressens pas le besoin		Oui	Non		Non
2013-10-25 00:03:26	1	174	62	40-49	Le jour (entre 7H et 20H)	Entre 12H et 14H, En début de soirée (18H-20H)	6 à 9 h	12 à 15 h	1	Trail de Bourbon (île de la Réunion) 90 km : 11ième scratch 2011	< 1	21h	Non	3	Non	Non	Non			0	2	2	0	0.5	Entre 7 et 8	Entre 7 et 8	Entre 7 et 8	Oui		20 minutes	Oui		40 minutes	Non	Je n'ai pas le temps		Oui		40 minutes	Non	Je n'ai pas le temps		Oui		1 heure	Oui	Non		Oui
2013-10-25 00:36:05	1	191	75	30-39	Le jour (entre 7H et 20H)	Avant 7H, Le soir (après 20H)	12 à 15 h	Plus de 15 h	5 et +	14:15, TNF Australia 2013 (100km, 4200D+) 16:57, TMBT Borneo 2013 (100km, 5400D+)	Entre 2 et 3h	22h	Non	5	Non	Non	Non			0	2	1	0	0	Entre 6 et 7	Entre 7 et 8	Entre 7 et 8	Oui		10'	Oui		30'	Oui		10'	Oui		30'	Oui		10'	Oui		30'	Non	Non		Non
2013-10-25 00:58:14	1	182	72	30-39	Le jour (entre 7H et 20H)	Avant 7H, Le matin (7H-12H), Entre 12H et 14H, En début de soirée (18H-20H)	3 à 6 h	9 à 12 h	2	La grande course des templiers 2012 The trail Yonne 2013 Le 80kms du Mont Blanc 2013	Entre 1 et 2h	23h	Non	3	Oui	Non	Non			0	2	1	2	0	Entre 7 et 8	Entre 7 et 8	Entre 7 et 8	Non	Je n'en ressens pas le besoin		Non	Je n'en ressens pas le besoin		Non	Je n'en ressens pas le besoin		Non	Je n'en ressens pas le besoin		Oui		30	Oui		30	Non			Non
2013-10-25 02:38:47	1	192	80	30-39	Le jour (entre 7H et 20H)	Cela varie chaque jour	3 à 6 h	6 à 9 h	2	31e échappée belle 2013 95e 80km Mont Blanc 2013	< 1	23h	Oui	2	Non	Non	Non			0	3	0	0	0	Entre 8 et 9	Entre 8 et 9	Entre 8 et 9	Non	Je n'ai pas la possibilité matérielle de la faire		Non	Je n'ai pas la possibilité matérielle de la faire		Non	Je n'ai pas la possibilité matérielle de la faire		Non	Je n'ai pas la possibilité matérielle de la faire		Non	Je n'ai pas la possibilité matérielle de la faire		Non	Je n'ai pas la possibilité matérielle de la faire		Oui	Non		Non
2013-10-25 03:03:52	1	166	64	50- 59	Le jour (entre 7H et 20H)	Entre 12H et 14H	6 à 9 h	Plus de 15 h	1	250 en 2008 sur le Grand raid et 278 en 2012 aussi sur le grand raid	> 3h	21h	Non	5 ans	Non	Oui	Non			0	5	5	0	0	Entre 5 et 6	Entre 5 et 6	Entre 5 et 6	Non	Je n'ai pas le temps		Non	Je n'ai pas le temps		Non	Je n'ai pas le temps		Oui		1	Oui		1	Oui		1	Oui	Oui	arret 1 à 3 heure dans une base de vie	Oui
2013-10-25 06:09:25	1	174	72	30-39	Le jour (entre 7H et 20H)	Cela varie chaque jour	Moins de 3 h	3 à 6 h	1	Je parle de finisher : CCC : 2008 Eco Trail : 2011 TDS : 2012	Entre 1 et 2h	22h	Non	2010	Oui	Non	Non			0	3	0	0	0	Entre 6 et 7	Entre 7 et 8	Entre 7 et 8	Non	Je n'ai pas le temps		Oui		45mn	Non	Je n'ai pas le temps		Oui		45mn	Non	Je n'ai pas le temps		Oui		45mn	Non	Non		Oui
2013-10-25 09:05:33	1	187	85	50- 59	Le jour (entre 7H et 20H)	Entre 12H et 14H, Le soir (après 20H)	6 à 9 h	9 à 12 h	3	42h GRR 2005 42h utmb 2007 43h GRP 2011	Entre 1 et 2h	23h	Non	2	Non	Non	Non			0	3	0	0	1	Entre 5 et 6	Entre 7 et 8	Entre 8 et 9	Oui		10 mn	Non	Je n'en ressens pas le besoin		Oui		10 mn	Non	Je n'en ressens pas le besoin		Oui		10 mn	Non	Je n'en ressens pas le besoin		Oui	Non		Oui
2013-10-25 15:12:14	1	190	82	18- 29	Le jour (entre 7H et 20H)	L'après-midi (14H-18H), Cela varie chaque jour	6 à 9 h	9 à 12 h	2	un seul ultra pour l'instant : la CCC 101km en aout dernier...	> 3h	Minuit	Non	1	Non	Non	Non			0	0	0	1	0	Entre 7 et 8	Entre 7 et 8	Entre 7 et 8	Non	Je n'en ressens pas le besoin		Non	Je n'en ressens pas le besoin		Non	Je n'en ressens pas le besoin		Non	Je n'en ressens pas le besoin		Non	Je n'en ressens pas le besoin		Non	Je n'en ressens pas le besoin		Oui	Non		Non
2013-10-26 07:54:29	2	161	55	30-39	Le jour (entre 7H et 20H)	Le matin (7H-12H), Entre 12H et 14H, Cela varie chaque jour	6 à 9 h	Plus de 15 h	5 et +	2013: 1 ier f et 11 au scratch sur l occitane 2012: 11 f sur la tds 2011: 15 f sur les 80 km du grp 2011: 3 ieme f sur l'utat	Entre 2 et 3h	21h	Non	5 ans	Oui	Oui	Non		J essaie de me relaxer le plus possible pour dormir Il m'arrive de me réveiller en plein nuit en sueur - généralement entre 2 h et 4h du matin- si je me douche j'arrive a me rendormir sans problème	0	2 mug le matin au réveil	0	0	0	Entre 5 et 6	Entre 6 et 7	Entre 6 et 7	Non	Rarement car ce n'est pas tjrs possible materiellement	Il m'arrive de faire une sieste de 15-20 minute mais rarement	Oui		Entre 20 minute et 1h	Oui		Je ft la sieste rarement pour des raison matérielles, sinon c entre 15-20min	Oui		Entre 20 minute et 1h	Oui	Rarement	Entre 15 et 20 min	Oui	Rarement.	Entre 15 et 20 min	Oui	Non	J ai abandonné pour hypothermie sur le GRR 2013, j ai dormi 30 minutes a ilet a bourse	Oui
2013-10-27 09:11:19	1	173	71	30-39	Le jour (entre 7H et 20H)	Entre 12H et 14H, Le soir (après 20H), Cela varie chaque jour	3 à 6 h	6 à 9 h	1	2012 Ultra trail Vercors 16h11	< 1	21h	Non	1	Non	Non	Non			0	3	0	0	0.5	Entre 8 et 9	Entre 8 et 9	Entre 8 et 9	Non	Je n'ai pas le temps		Oui		15 mn	Non	Je n'ai pas le temps		Oui		15 mn	Non	Je n'ai pas le temps		Oui		15 mn	Oui	Non		Non
2013-10-28 01:55:37	1	170	69	40-49	Le jour (entre 7H et 20H)	Avant 7H, Entre 12H et 14H, En début de soirée (18H-20H)	9 à 12 h	Plus de 15 h	4	2012 GRP 36h00 2013 Ultra Ardechois 14h 2013 6666 2013 UTV	< 1	21h	Oui	10	Non	Non	Non			0	5	0	0	0	Entre 7 et 8	Entre 7 et 8	Entre 7 et 8	Oui		20	Oui		20	Non	Je n'ai pas la possibilité matérielle de la faire		Oui		20	Non	Je n'ai pas la possibilité matérielle de la faire		Oui		60	Oui	Non		Non
2013-10-28 12:41:24	1	180	81	18- 29	Le jour (entre 7H et 20H)	Cela varie chaque jour	9 à 12 h	12 à 15 h	1	Aucun. Je pratique très peut en compétition	Entre 1 et 2h	22h	Non	3 ans	Non	Non	Non			0	0	1	0	0	Entre 7 et 8	Entre 7 et 8	Entre 7 et 8	Oui		20 min	Oui		20 min	Oui		20 min	Oui		20 min	Oui		20 min	Oui		20 min	Oui	Oui	des séquences de 20 min à 1h du matin et 4h pour 24h de course	Non
2013-10-28 14:00:30	1	169	69	50- 59	Le jour (entre 7H et 20H)	Le matin (7H-12H), L'après-midi (14H-18H), Cela varie chaque jour	6 à 9 h	9 à 12 h	1	UTMB 2006 Finisher TDG 2012 Finisher TDG 2013 Finisher	< 1	Minuit	Non	30	Non	Non	Non		Être dehors la journée me dépenser, faire du sport.	0	0	1	0	0	Entre 7 et 8	Entre 7 et 8	Entre 8 et 9	Non	Je n'ai pas le temps		Oui	Je n'en ressens pas le besoin	1 h	Non	Je n'ai pas le temps	1 h	Oui		1 heure	Non	Je n'ai pas le temps		Oui		1.3	Oui	Non		Oui
2013-10-28 14:12:57	2	162	52	30-39	Le jour (entre 7H et 20H)	Entre 12H et 14H	9 à 12 h	12 à 15 h	4	-ENDURANCE TRAIL TEMPLIERS 2012: 3EME FEMME -TCHIMBE RAID (MARTINIQUE 2013): 1ERE FEMME -ULTRA TRAIL RESTONICA 2013: 1ERE FEMME -SWISS IRON TRAIL 2013: 3EME FEMME -DIAGONALE DES FOUS 2013!!!!: 6EME FEMME	< 1	21h	Non	15	Non	Non	Non			0	6	1	0	0	Entre 7 et 8	Entre 8 et 9	Entre 8 et 9	Oui		10 MINUTES	Non	JE NE PRENDS PAS LE TEMPS		Oui	Je n'ai pas le temps	10 MIN	Non	Je n'en ressens pas le besoin		Oui	Je n'ai pas le temps	10 MIN	Non	Je n'en ressens pas le besoin		Oui	Oui	QUAND MES YEUX SE FERMENT TOUT SEULS, JE ME METS SUR LE BORD DU CHEMIN, M'ASSOIE, FERME LES YEUX JUSQU'A SENTIR UN SOMMEIL PROFOND (SENSATION DE REVE), PENDANT qq MINUTES (2 ou 3 fois pendant la diagonale des fous) ou VRAIE PAUSE (AVEC ALARME DE REVEIL) DE 20 minutes (2 fois au cours de la diagonale des fous)	Oui
2013-10-29 16:51:17	1	172	64	30-39	Le jour (entre 7H et 20H)	Cela varie chaque jour	6 à 9 h	9 à 12 h	1	Raid de l'Estuaire 2008 (89km 1070D+): 14ème en 11h37 Grand Raid des Pyrénnées (150km 9300D+): 28ème en 29h53 Les Templiers 2008 ( 72km 3200D+): 314ème en 9h23	Entre 2 et 3h	22h	Non	7	Non	Non	Non			0	1	1	0	0	Entre 7 et 8	Entre 8 et 9	Entre 8 et 9	Non	Je n'ai pas le temps		Non	Je n'ai pas la possibilité matérielle de la faire		Non	Je n'ai pas le temps		Non	Je n'en ressens pas le besoin		Oui		45	Oui		45	Oui	Non		Non
2013-10-30 07:45:12	1	173	71	30-39	Le jour (entre 7H et 20H)	Le matin (7H-12H), L'après-midi (14H-18H), En début de soirée (18H-20H)	6 à 9 h	12 à 15 h	1	Diagonale 2013 56heures	Entre 2 et 3h	23h	Non	3	Non	Non	Non			0	4	0	0	0	Entre 7 et 8	Entre 9 et 10	Entre 9 et 10	Non	Je n'ai pas la possibilité matérielle de la faire		Oui		25	Non	Je n'ai pas le temps		Oui		25	Non	Je n'ai pas le temps		Oui		60	Non	Non		Non
2013-11-01 09:11:37	2	165	49	40-49	Le jour (entre 7H et 20H)	Cela varie chaque jour	3 à 6 h	6 à 9 h	1	CCC en 2011	Entre 1 et 2h	23h	Oui	4	Non	Non	Non			0	2	1	0	0	Entre 6 et 7	Entre 8 et 9	Entre 9 et 10	Non	Je n'ai pas la possibilité matérielle de la faire		Oui		30 minutes	Non	Je n'ai pas la possibilité matérielle de la faire		Oui		30 mn	Non	Je n'ai pas la possibilité matérielle de la faire		Oui		40mn	Oui	Non		Non
2013-11-01 13:31:58	1	193	82	30-39	Le jour (entre 7H et 20H)	Avant 7H, Le matin (7H-12H)	3 à 6 h	6 à 9 h	1	CCC en 2011 GRP en 2013	Entre 2 et 3h	21h	Non		Non	Non	Non			0	0	2	0	1	Entre 7 et 8	Entre 7 et 8	Entre 8 et 9	Non	Je n'ai pas le temps		Non	Je n'y pense pas		Non	Je n'ai pas le temps		Non	Je n'y pense pas		Oui		20	Oui		30	Oui	Oui	GRP 2013 : environ 41h de course, 2 siestes respectivement de 20 et 30 minutes à deux ravitos	Non
2013-11-03 10:41:52	1	180	71	50- 59	Le jour (entre 7H et 20H)	En début de soirée (18H-20H)	6 à 9 h	9 à 12 h	2	CCC 2011: 717ème en 18h58'	Entre 1 et 2h	22h	Non	2	Non	Oui	Non			0	1	1	<1	<1	Entre 6 et 7	Entre 8 et 9	Entre 8 et 9	Non	Je n'en ressens pas le besoin		Non	Je n'en ressens pas le besoin		Non	Je n'ai pas le temps		Oui		30	Non	Je n'ai pas le temps		Oui		30	Oui	Non		Non
2013-11-08 13:45:12	1	180	78	30-39	Le jour (entre 7H et 20H)	Entre 12H et 14H, En début de soirée (18H-20H)	3 à 6 h	12 à 15 h	2	79ème CCC 2010 19ème trail des Hospitaliers 2011 211ème Tor des Géants 2013	< 1	21h	Non	1	Non	Non	Non			0	0	1	0,2	0,2	Entre 7 et 8	Entre 8 et 9	Entre 9 et 10	Non	Je n'ai pas la possibilité matérielle de la faire		Non	Je n'en ressens pas le besoin		Non	Je n'ai pas le temps		Oui		30 minutes	Non	Je n'ai pas la possibilité matérielle de la faire		Oui		30 minutes	Oui	Non		Non
2013-11-13 14:19:44	1	184	83	50- 59	Le jour (entre 7H et 20H)	L'après-midi (14H-18H)	3 à 6 h	9 à 12 h	1	aucun reussi en 2013	Entre 1 et 2h	plus tard que minuit	Non	7	Oui	Oui	Non			0	2	2	0	0	Entre 5 et 6	Entre 6 et 7	Entre 7 et 8	Oui		8 minutes	Oui		8 minutes	Oui		8 minutes	Oui		8 minutes	Oui		8 minutes	Oui		30-40 minutes	Oui	Non		Non
2013-11-15 08:26:41	1	177	74	> 60	Sans emploi	Le matin (7H-12H), Entre 12H et 14H, En début de soirée (18H-20H)	6 à 9 h	9 à 12 h	2	UTMB 2004 42h47m Réunion 2004 37h11m Mercantour 2005 20h18m	> 3h	22h	Non	<1	Non	Non	Non			0	0	2	0	0	Entre 7 et 8	Entre 9 et 10	Entre 8 et 9	Non	Je n'ai pas le temps		Oui		1h	Non	Je n'ai pas le temps		Oui		1h	Non	Je n'ai pas le temps		Oui		1h	Oui			Oui
2013-11-18 12:31:47	1	179	73	50- 59	Le jour (entre 7H et 20H)	Le soir (après 20H)	6 à 9 h	Plus de 15 h	2	2013 Ut4M 36H21 49ème 2013 Ulta Lozère 11H15 40ème 2012 Ulta des Coursières 16H28 64 ème 2013 UTMB 19h16 747ème (blessé) 2011 Ulta des templiers 21H27 378ème (blessé 2mois ½ avant opération disjonction acromio-claviculaire)	Entre 1 et 2h	22h	Non	6	Oui	Oui	Non			0	5	0	0	0	Entre 6 et 7	Entre 6 et 7	Entre 6 et 7	Non	Je n'ai pas la possibilité matérielle de la faire		Non	Je n'ai pas le temps		Non	Je n'ai pas la possibilité matérielle de la faire		Non	Je n'ai pas le temps		Non	Je n'ai pas la possibilité matérielle de la faire		Oui		20 mn	Oui	Non		Non
2013-11-19 08:05:02	1	174	71	40-49	Le jour (entre 7H et 20H)	Cela varie chaque jour	3 à 6 h	9 à 12 h	1	Ultra Trail des Coursières 2011 14h50 La Boucle Trail Verbier Saint-Bernard 2012 27h	Entre 2 et 3h	23h	Non	3	Non	Oui	Non			0	2	1	0	0	Entre 7 et 8	Entre 8 et 9	Entre 8 et 9	Non	Je n'ai pas le temps		Oui		30 minutes	Non	Je n'ai pas le temps		Oui		30 minutes	Non	Je n'ai pas le temps		Oui	Je n'ai pas la possibilité matérielle de la faire	30 minutes	Oui	Oui	entre 1h du matin et 3h du matin en refuge sur la Boucle à Verbier 2h de sommeil pour 27h de course	Non
2013-11-20 01:37:03	1	172	62	40-49	Le jour (entre 7H et 20H)	Cela varie chaque jour	6 à 9 h	12 à 15 h	2	Finisher en 38 h UTMB 2006 Finisher Montagn'Hard 97 kms en 27h 2009 Finisher en 41h UTMB 2008 Finisher Eco trail Paris 80kms en 9h15 2012 Finisher en 28h48 TDS 2013	Entre 1 et 2h	22h	Non	7	Non	Non	Non		Si grosse séance d'entraînement (VMA - escalade - travail de force - renforcement musculaire) étirements passifs. Relaxation, sophrologie au couché dans le lit.	Aucunes	Deux	Aucunes	Aucuns	Aucuns	Entre 7 et 8	Entre 8 et 9	Entre 8 et 9	Non	Je n'en ressens pas le besoin		Non			Oui		15-20'	Oui		15-20'	Oui		15-20'	Oui		15-20'	Oui	Oui	Pause de 20' par nuit de course. J'ai souvent attendu d'en avoir besoin, quitte à devoir me "trainer" jusqu'au poste suivant... Toutefois, avec la répétition des ultra j'ai de moins en moins besoin de ces pauses... Je les fais soit en fin de nuit juste avant le lever du jour entre 4 et 5h30'. Montagn'Hard 97kms 27h TDS 120kms en 29h48 Fin UTMB 2010 98kms en environ 18h57'	Oui
2013-11-21 12:15:06	1	172	68	18- 29	Le jour (entre 7H et 20H)	L'après-midi (14H-18H), En début de soirée (18H-20H), Cela varie chaque jour	9 à 12 h	12 à 15 h	4	SAINTELYON 2012 08h52'51 TRAIL ARDÉCHOIS 2013 16:13:42 GRAND RAID 73 2013 10h01'49 UT4M 2013 41h20	> 3h	22h	Non	7	Non	Non	Non			0	2	1	0	0	Entre 7 et 8	Entre 7 et 8	Entre 7 et 8	Oui		20min	Oui		20min	Oui		20min	Oui		20min	Oui		20min	Oui		20min	Oui	Oui	UT4M 2013 41h20 départ de la course à 5h du matin sommeil à 12h30 le lendemain d'une durée de 20min	Non
2013-11-24 13:00:30	1	172	63	30-39	Le jour (entre 7H et 20H)	Avant 7H, Le matin (7H-12H), En début de soirée (18H-20H)	9 à 12 h	Plus de 15 h	0	Ai participé à la Trans'aq en 2011.	< 1	21h	Non	je ne sais pas	Non	Non	Non			0	4	0	1	0	Entre 7 et 8	Entre 7 et 8	Entre 7 et 8	Non	Je n'ai pas le temps		Oui		60 minutes	Non	Je n'ai pas le temps		Oui		60	Non	Je n'ai pas le temps		Oui		60	Non	Non		Oui
2013-11-25 08:38:28	1	1,74	72	18- 29	Le jour (entre 7H et 20H)	Avant 7H, En début de soirée (18H-20H)	3 à 6 h	6 à 9 h	1	Ultra-Marathon. 115km - réalisé en 40h. Par session de 25km avec du temps de récupération entre chaque session.	> 3h	23h	Non	4	Non	Non	Non			0	1	1	0	1	Entre 6 et 7	Entre 7 et 8	Entre 7 et 8	Non	Je n'ai pas la possibilité matérielle de la faire		Oui		15	Non	Je n'ai pas la possibilité matérielle de la faire		Oui		15	Non	Je n'ai pas la possibilité matérielle de la faire		Oui		30	Non			Non
2013-11-25 17:37:35	1	185	82	18- 29	Le jour (entre 7H et 20H)	En début de soirée (18H-20H)	6 à 9 h	9 à 12 h	1	21e Canadian Death Race 2013 17heures/125km Autres performances: 13e Ultimate XC 8heures/58km 5e Quebec Mega Trail 3h45/42km	Entre 2 et 3h	22h	Non	1	Non	Non	Non			0	1	0	0	1	Entre 7 et 8	Entre 8 et 9	> 10	Oui		20	Non	Je n'en ressens pas le besoin		Oui		20	Oui		20	Oui		1h	Non	Je n'en ressens pas le besoin		Non			Non
2013-11-25 13:57:01	1	168	57	40-49	Le jour (entre 7H et 20H)	Le matin (7H-12H), Entre 12H et 14H, Le soir (après 20H)	3 à 6 h	6 à 9 h	1	2009 25eme grand duc 2010 26eme Ultra Beaufortain 2012 114eme TDS 2013 49eme Echapeebelledone	Entre 1 et 2h	23h	Non	10	Non	Non	Non			0	3	1	0	0	Entre 7 et 8	Entre 8 et 9	Entre 8 et 9	Non	Je n'ai pas la possibilité matérielle de la faire		Non	Je n'en ressens pas le besoin		Non	Je n'ai pas la possibilité matérielle de la faire		Non	Je n'en ressens pas le besoin		Non	Je n'en ressens pas le besoin		Non	Je n'en ressens pas le besoin		Oui	Non		Non
2013-11-25 18:56:30	1	179	71	30-39	Le jour (entre 7H et 20H)	Le matin (7H-12H)	9 à 12 h	Plus de 15 h	1	2013 2ème, Ultimate XC, 58 km 1er, Ultratrail Harricana, 65 km	< 1	21h	Non	9	Non	Non	Non			0	1	0	0	0	Entre 7 et 8	Entre 8 et 9	Entre 8 et 9	Non	Je n'ai pas le temps		Non	Je n'ai pas le temps		Non	Je n'ai pas le temps		Non	Je n'ai pas le temps		Non	Je n'ai pas le temps		Non	Je n'ai pas le temps		Non			Non
2013-11-25 19:59:58	1	183	85	30-39	Le jour (entre 7H et 20H)	En début de soirée (18H-20H), Le soir (après 20H)	3 à 6 h	6 à 9 h	1	TNF Endurance Challenge Bear Mountain NY 50 Miles, 11h57 (le seul!)	< 1	22h	Non	10	Non	Non	Non			0	0	0	0	0	Entre 7 et 8	Entre 7 et 8	Entre 8 et 9	Non	Je n'ai pas le temps		Non	Je n'ai pas le temps		Non	Je n'en ressens pas le besoin		Non	Je n'en ressens pas le besoin		Non	Je n'ai pas le temps		Non	Je n'en ressens pas le besoin		Non			Non
2013-12-03 00:40:40	2	159	45	40-49	Le jour (entre 7H et 20H)	Cela varie chaque jour	9 à 12 h	12 à 15 h	2	euskal trail 2013 100km D+500M 20h environ DIAGONALE FOUS 2013 57H	< 1	22h	Non	4 ANS	Non	Non	Non			0	3	0	0	0	Entre 7 et 8	Entre 7 et 8	Entre 7 et 8	Non	Je n'en ressens pas le besoin		Non	Je n'en ressens pas le besoin		Non	Je n'en ressens pas le besoin		Non	Je n'en ressens pas le besoin		Non	Je n'en ressens pas le besoin		Non	Je n'en ressens pas le besoin		Non	Non		Non
2013-12-03 13:07:49	1	170	68	50- 59	Le jour (entre 7H et 20H)	Avant 7H, Entre 12H et 14H	6 à 9 h	9 à 12 h	1	jamais abandonné, meilleure place sans me rappeler exactement: fin deuxième tiers du pseudo utmb 2012	< 1	21h	Oui	15	Non	Non	Non			o	2	0	0	1	Entre 7 et 8	Entre 8 et 9	Entre 9 et 10	Non	Je n'ai pas le temps		Oui		30mn	Non	Je n'ai pas le temps		Non	Je n'en ressens pas le besoin		Non	Je n'ai pas le temps		Non		1h	Oui	Non		Oui
2013-12-04 06:52:41	1	180	80	40-49	Le jour (entre 7H et 20H)	Avant 7H, En début de soirée (18H-20H)	3 à 6 h	6 à 9 h	4	2007 11 émes du semi raid du golfe du morbihan 2033 84 émes des templiers	Entre 1 et 2h	22h	Oui	2013	Non	Oui	Non		AUCUNE	0	3	0	0	0	Entre 7 et 8	Entre 7 et 8	Entre 7 et 8	Non	Je n'en ressens pas le besoin		Non	Je n'en ressens pas le besoin		Non	Je n'en ressens pas le besoin		Non	Je n'en ressens pas le besoin		Non	Je n'en ressens pas le besoin		Non	Je n'en ressens pas le besoin		Oui	Non		Oui
2013-12-05 06:02:42	1	187	76	30-39	Le jour (entre 7H et 20H)	Avant 7H, Le matin (7H-12H), Entre 12H et 14H	6 à 9 h	9 à 12 h	0	pas encore effectué d'ultra-trail distance max couru en trails à ce jour = 50km / 3000D+ mais à J-2 de la SaintéLyon en solo sur cette édition 2013, au programme 75km (i) mon cycle préparatoire à l'ultra se fera encore sur 2014 avec du trail en Hte Montagne mais 64km max, pour un 1er test sur la 6666 Occitane (105km/6000D+) en mai 2015 puis la TDS (119km/7250D+) en août 2015	Entre 2 et 3h	23h	Non	2	Non	Oui	Non			0	5	2	0	0	Entre 5 et 6	Entre 7 et 8	Entre 7 et 8	Non	Je n'ai pas le temps		Non	Je n'ai pas le temps		Non	Je n'ai pas le temps		Non	Je n'ai pas le temps		Non	Je n'ai pas le temps		Non	Je n'ai pas le temps		Non			Non
2013-12-13 15:08:27	1	173	68	40-49	Le jour (entre 7H et 20H)	Le matin (7H-12H), En début de soirée (18H-20H)	3 à 6 h	9 à 12 h	2	En general dans le premier tiers	Entre 1 et 2h	23h	Non	12	Non	Non	Non			0	7	un bol	0	1	Entre 7 et 8	Entre 8 et 9	Entre 8 et 9	Oui		15 min	Oui		15min	Oui		15min	Oui		15min	Oui		15min	Oui		15min	Oui	Non	GRP et autres sans sommeil en 40 heures	Oui
2013-12-14 03:42:28	1	189	69	30-39	Le jour (entre 7H et 20H)	Le matin (7H-12H), Entre 12H et 14H	3 à 6 h	3 à 6 h	2	UTMB 2011 : 43h45 Grand raid Réunion 2013 : 59h30	Entre 1 et 2h	22h	Non	12	Oui	Oui	Non		Lecture avant de dormir	0	1	1	0	0	Entre 7 et 8	Entre 8 et 9	Entre 8 et 9	Non	Je n'en ressens pas le besoin		Non	Je n'en ressens pas le besoin		Non	Je n'en ressens pas le besoin		Non	Je n'en ressens pas le besoin		Non	Je n'en ressens pas le besoin		Non	Je n'en ressens pas le besoin		Oui	Non		Oui
2013-12-19 10:56:01	1	185	77	18- 29	Le jour (entre 7H et 20H)	En début de soirée (18H-20H)	3 à 6 h	6 à 9 h	1	J'ai participé à un seul ultra et j ai abandonné	Entre 1 et 2h	21h	Non	2010	Non	Non	Non			0	1	1	0	0	Entre 8 et 9	Entre 8 et 9	Entre 8 et 9	Non	Je n'en ressens pas le besoin		Non	Je n'en ressens pas le besoin		Non	Je n'en ressens pas le besoin		Non	Je n'en ressens pas le besoin		Non	Je n'ai pas le temps		Non	Je n'ai pas le temps		Oui	Oui	J'ai dormi une heure sur un epreue qui durait 24 heures	Non
2013-12-22 13:45:39	1	167	63	50- 59	Le jour (entre 7H et 20H)	Entre 12H et 14H, L'après-midi (14H-18H), En début de soirée (18H-20H)	9 à 12 h	Plus de 15 h	4	UTMB 2004 : 216ème Diagonale des Fous : 230ème	Entre 2 et 3h	23h	Oui	7 ans	Non	Non	Non		Rien de spécial !!	0	3	0	0	0	Entre 7 et 8	Entre 7 et 8	Entre 7 et 8	Non	Je n'en ressens pas le besoin		Non	Je n'en ressens pas le besoin		Non	Je n'en ressens pas le besoin		Non	Je n'en ressens pas le besoin		Non	Je n'en ressens pas le besoin		Non	Je n'en ressens pas le besoin		Oui	Non		Oui
2013-12-23 01:46:28	1	178	70	40-49	Le jour (entre 7H et 20H)	Le matin (7H-12H), En début de soirée (18H-20H)	6 à 9 h	Plus de 15 h	3	3eme senior trail du Ventoux 56km 2011 1er V1 Trail du Ventoux 2013	Entre 2 et 3h	22h	Non	5	Non	Non	Non			0	7	0	0	1	Entre 7 et 8	Entre 7 et 8	Entre 8 et 9	Non	Je n'ai pas la possibilité matérielle de la faire		Oui		1	Non	Je n'ai pas la possibilité matérielle de la faire		Oui		1	Non	Je n'ai pas la possibilité matérielle de la faire		Oui		1	Oui	Non		Oui
2013-12-24 08:20:20	1	185	71	40-49	Le jour (entre 7H et 20H)	Entre 12H et 14H, L'après-midi (14H-18H)	6 à 9 h	12 à 15 h	2	Trail de Bourbon (aucune idée de la place, c'était mon premier trail) en 2011	Entre 2 et 3h	22h	Non	des années !!!	Non	Oui	Non		je lis	0	0	2	0	0	Entre 7 et 8	Entre 7 et 8	Entre 7 et 8	Non	Je n'ai pas le temps		Non	je ne prends pas le temps		Non	Je n'ai pas le temps		Non	ca m'arrive parfois, mais c'est très très rare		Non	Je n'ai pas le temps		Non	idem		Oui	Non		Non
2013-12-27 04:47:28	2	160	54	30-39	Le jour (entre 7H et 20H)	Le matin (7H-12H), Entre 12H et 14H	3 à 6 h	9 à 12 h	1	INFERNAL TRAIL ST NABORD 40H44	Entre 1 et 2h	21h	Oui	8	Non	Oui	Non			0	4	1	0	0	Entre 7 et 8	Entre 7 et 8	Entre 8 et 9	Non	Je n'ai pas le temps		Oui		20 -30 MN	Non	Je n'ai pas le temps		Oui		20-30MN	Non	Je n'ai pas le temps		Oui		20-30MN	Oui	Non		Oui
2013-12-29 12:18:17	1	179	68	30-39	Le jour (entre 7H et 20H)	En début de soirée (18H-20H), Le soir (après 20H)	3 à 6 h	6 à 9 h	0	0	< 1	Minuit	Non	10	Non	Non	Non			0	4	0	0	0	Entre 7 et 8	Entre 8 et 9	> 10	Non	Je n'ai pas le temps		Non			Non	Je n'ai pas le temps		Non	je cours a l'heure de la sieste		Non	Je n'ai pas la possibilité matérielle de la faire		Non	je cours à l'heure de la sieste		Non	Non		Non
2014-01-01 04:42:08	1	168	62	50- 59	Le jour (entre 7H et 20H)	Le matin (7H-12H), Entre 12H et 14H, En début de soirée (18H-20H)	6 à 9 h	6 à 9 h	2	Utmb: 6eme en 2004 GRR: 14 eme en 2012 Cromagnon: 2 eme en 2001 et 3ème en 2012 RMV: 1er en 2005 RAID dentelles ventoux: 1er en 2012 Ut leman: 1er en 2013 MdS: 16 eme en 2013	Entre 1 et 2h	23h	Non	11	Non	Non	Non			0	0	8	0	0	Entre 6 et 7	Entre 7 et 8	Entre 7 et 8	Non	Je n'en ressens pas le besoin		Non	Je n'en ressens pas le besoin		Non	Je n'en ressens pas le besoin		Non	Je n'en ressens pas le besoin		Non	Je n'en ressens pas le besoin		Non	Je n'en ressens pas le besoin		Oui	Non		Oui
2013-10-01 16:58:20	1	183	78	40-49	Le jour (entre 7H et 20H)	Avant 7H, Entre 12H et 14H, Le soir (après 20H)	6 à 9 h	12 à 15 h	2	3 fois top 6 utmb	Entre 1 et 2h	22h	Non	10	Non	Non	Non			0	0	1	0	1	Entre 7 et 8	Entre 8 et 9	Entre 7 et 8	Non	Je n'ai pas le temps		Oui		20 minutes	Non	Je n'ai pas le temps		Oui	20 minutes		Oui		20 minutes	Oui		1 heure	Oui	Non		Non
2013-10-01 22:43:58	1	172	64	40-49	Le jour (entre 7H et 20H)	Le matin (7H-12H), L'après-midi (14H-18H)	3 à 6 h	Plus de 15 h	3	Echappée belle 2013 23ième TOE 2011 17 ième UTMB 05/06/07 autour des 100	> 3h	21h	Non	10	Non	Non	Non			0	0	0	0	0	Entre 8 et 9	Entre 8 et 9	Entre 8 et 9	Non	Je n'en ressens pas le besoin		Non	Je n'en ressens pas le besoin		Non	Je n'en ressens pas le besoin		Oui		15 min	Oui		15 min	Oui		15 min	Oui	Non		Oui
2013-10-01 22:57:57	1	187	81	30-39	Le jour (entre 7H et 20H)	Avant 7H, En début de soirée (18H-20H), Le soir (après 20H), Cela varie chaque jour	3 à 6 h	3 à 6 h	1	350 ème utmb 2009 100 ème tor des geants 2010 50 ème utpma 2012	< 1	22h	Oui	5	Non	Non	Non			0	4	1	0	1	Entre 5 et 6	Entre 7 et 8	Entre 7 et 8	Non	Je n'ai pas le temps		Oui		20 MINUTES	Non	Je n'ai pas le temps		Oui		20	Non	Je n'ai pas le temps		Oui		20	Oui	Non		Oui
2013-10-01 23:20:57	1	165	58	40-49	Le jour (entre 7H et 20H)	Avant 7H, Entre 12H et 14H	9 à 12 h	12 à 15 h	5 et +	2012 - Run d'Amore 100-miles - 14:54 2012 - Jed Smith 50K - 3:19 2011 - Last Chance 80K - 5:43 2011 - San Francisco 12-hours - 128 km Et de nombreux podiums sur des parcours plus accidentés	< 1	je ne regarde jamais d'écran	Non	7	Non	Non	Non			0	0	0	0	0	Entre 6 et 7	Entre 7 et 8	Entre 9 et 10	Non	Je n'ai pas le temps		Non	Je n'en ressens pas le besoin		Non	Je n'ai pas le temps		Oui		40 minutes	Non	Je n'ai pas le temps		Oui		40 minutes	Oui	Non		Non
2013-10-01 23:26:53	1	170	65	30-39	Le jour (entre 7H et 20H)	Le matin (7H-12H), Entre 12H et 14H, En début de soirée (18H-20H)	6 à 9 h	12 à 15 h	3	Ultratrail du Mont Blanc 2004, 58ème Ultratrail du Mont Blanc 2005, 98ème Diagonale des Fous 2005, 79ème Grand Raid des Pyrénées 2010, 33ème Diagonale des Fous 2010, 86ème Tor des Géants 2011, 336 km, 35ème Tor des Géants 2012, 336 km, 67ème Tor des Géants 2013, 336 km, 82ème	Entre 1 et 2h	22h	Non	10	Non	Non	Non			0	2	1	0	1	Entre 7 et 8	Entre 7 et 8	Entre 7 et 8	Non	Je n'ai pas la possibilité matérielle de la faire		Non			Non	Je n'ai pas la possibilité matérielle de la faire		Oui		20 MN	Non	Je n'ai pas la possibilité matérielle de la faire		Oui		45 MN	Oui	Oui	Sur mes UTMB (6 participations de 2004 à 2009, entre 31 heures et 39 heures) j'ai pratiqué à plusieurs reprises des mico sièstes de 10 mn environ.	Oui
2013-10-02 00:07:40	1	186	83	18- 29	Le jour (entre 7H et 20H)	Avant 7H, Entre 12H et 14H, Le soir (après 20H)	6 à 9 h	9 à 12 h	1	28ème à l'Echappée Belle 2013 351ème à l'UTMB 2012 33ème Aravis Trail 2012 221ème CCC 2011	Entre 1 et 2h	22h	Non	6	Non	Non	Non			0	2	2	0	0	Entre 6 et 7	Entre 7 et 8	Entre 7 et 8	Non	Je n'en ressens pas le besoin		Non	Je n'en ressens pas le besoin		Non	Je n'en ressens pas le besoin		Oui		0h15	Oui		0h30	Oui		1h	Oui	Oui	Sur un lit de camp dans une tente de ravitaillement pendant 15 minutes. Durée totale de course: 37h	Non
2013-10-02 00:08:39	1	171	62	40-49	Le jour (entre 7H et 20H)	Avant 7H, Entre 12H et 14H, L'après-midi (14H-18H)	6 à 9 h	9 à 12 h	5 et +	2012, Grand trail du Nord, 2e 2011, TDG, 11e	Entre 1 et 2h	21h	Non	10	Non	Non	Non			0	1	6	0	0	Entre 7 et 8	Entre 8 et 9	Entre 8 et 9	Non	je me reveille plus fatiquez		Non			Non			Non			Non			Non			Oui	Oui	utmb,38h et 34h, 1 p'tit sieste de 15' rdc 40h : 2 p'tit siestes de 15'	Oui
2013-10-02 00:46:18	1	181	72	30-39	Le jour (entre 7H et 20H)	Cela varie chaque jour	12 à 15 h	Plus de 15 h	2	4ème au Grand Raid Réunion 2009 4ème au Grand Raid Réunion 2012	Entre 1 et 2h	22h	Non	2011	Oui	Oui	Oui	Parfois (avant lors de crise de "non sommeil" ALPRAZOLAN	Maintenant, respiration, détente et vide intellectuel.	0	0	1 tous les 2 jours	1 tous les 4 jours	2 par semaine	Entre 7 et 8	Entre 8 et 9	Entre 8 et 9	Non	Je n'ai pas la possibilité matérielle de la faire		Oui		30' à 2h	Non	Je n'ai pas le temps		Oui		30' à 2h	Non	Je n'ai pas le temps		Oui		30' à 2h	Oui	Non		Oui
2013-10-02 00:51:41	2	166	59	30-39	Le jour (entre 7H et 20H)	Avant 7H, En début de soirée (18H-20H), Cela varie chaque jour	12 à 15 h	Plus de 15 h	3	UTMB 2013 - 39h45	> 3h	23h	Non	3	Oui	Oui	Non		regarder des films jusqu'à m'endormir devant	0	3	0.5	0	0	Entre 7 et 8	Entre 8 et 9	Entre 8 et 9	Non	Je n'ai pas le temps		Non	Je n'en ressens pas le besoin		Non	Je n'ai pas le temps		Non	Je n'en ressens pas le besoin		Non	Je n'ai pas le temps		Oui		1 heure	Oui	Oui	TDS 2011, sieste de 15 mn par terre à un ravitaillement. Temps total environ 30h	Oui
2013-10-02 00:55:11	1	170	67	30-39	Le jour (entre 7H et 20H)	Avant 7H, Entre 12H et 14H, En début de soirée (18H-20H)	3 à 6 h	6 à 9 h	1	GRP160 en 2012: 105eme Ultra aubrac en 2011: 76eme	> 3h	22h	Non	5ans	Non	Non	Non			Zero	5	1	Zero	Zero	Entre 7 et 8	Entre 7 et 8	Entre 8 et 9	Non	Je n'ai pas la possibilité matérielle de la faire		Non	Je n'ai pas le temps		Non	Je n'ai pas le temps		Non	Je n'ai pas le temps		Non	Je n'ai pas le temps		Non	Je n'ai pas le temps		Oui	Oui	20 minutes a la 30e heure de course. Cause: épuisement et intolérance digestive majeure. Ça allait impeccable après!	Non
2013-10-02 01:24:37	1	182	88	40-49	La nuit	Avant 7H, Le matin (7H-12H), L'après-midi (14H-18H)	6 à 9 h	9 à 12 h	1	templier2006 utmb 2009 occitane 2013	< 1	jamais après 20h	Oui	2008	Non	Non	Non			0	6	0	0	0	Entre 6 et 7	Entre 6 et 7	Entre 7 et 8	Oui		2h	Non	Je n'en ressens pas le besoin		Oui		2h	Non	Je n'en ressens pas le besoin		Oui		2h	Non	Je n'en ressens pas le besoin		Oui	Non		Oui
2013-10-02 01:30:47	2	165	58	30-39	Le jour (entre 7H et 20H)	Avant 7H, Entre 12H et 14H, En début de soirée (18H-20H)	3 à 6 h	9 à 12 h	1	Eco-trail 2013 80 km, 10 heures	Entre 1 et 2h	22h	Non	2009	Non	Non	Non			0	0	2 à 4	0	0	Entre 8 et 9	Entre 9 et 10	Entre 9 et 10	Non	Je n'ai pas le temps		Oui		20 minutes	Non	Je n'ai pas le temps		Oui		20 minutes	Non	Je n'ai pas le temps		Oui		20 minutes	Non			Non
2013-10-02 01:54:23	1	183	72	40-49	Le jour (entre 7H et 20H)	Le matin (7H-12H), L'après-midi (14H-18H), En début de soirée (18H-20H), Cela varie chaque jour	6 à 9 h	12 à 15 h	1	23 ème en 31h42 au grand raid des pyrénées 2013.	Entre 2 et 3h	23h	Non	9	Non	Non	Non		Je me couche...	0	2	0	0	0	Entre 7 et 8	Entre 9 et 10	Entre 9 et 10	Non	Je n'en ressens pas le besoin		Non	Je n'en ressens pas le besoin		Non	Je n'en ressens pas le besoin		Non	Je n'en ressens pas le besoin		Non	Je n'en ressens pas le besoin		Non	Je n'en ressens pas le besoin		Oui	Non		Non
2013-10-02 01:59:37	1	171	75	40-49	Le jour (entre 7H et 20H)	Cela varie chaque jour	3 à 6 h	9 à 12 h	1	117 tor 2013	> 3h	Minuit	Oui	4	Non	Non	Non		je dors bcp mieux depuis que j'ai eliminé le gluten de mon alimentation	0	0	1	0.5	0	Entre 6 et 7	Entre 6 et 7	Entre 6 et 7	Non	Je n'en ressens pas le besoin		Oui		20 minutes	Non	Je n'en ressens pas le besoin	20 minutes	Oui		20 minutes	Non	Je n'en ressens pas le besoin		Oui		20 minutes	Oui	Non		Oui
2013-10-02 02:02:32	1	184	73	30-39	Le jour (entre 7H et 20H)	Entre 12H et 14H, En début de soirée (18H-20H)	3 à 6 h	6 à 9 h	1	GRP 2008 : 2e en 31 h 20 min UTMB 2009 : 115e en 30 h 40 min	< 1	21h	Non	6	Non	Oui	Non			0	0	0	0	0	Entre 8 et 9	Entre 8 et 9	Entre 8 et 9	Non	Je n'en ressens pas le besoin		Non	Je n'en ressens pas le besoin		Non	Je n'en ressens pas le besoin		Non	Je n'en ressens pas le besoin		Non	Je n'ai pas le temps		Oui		30 min	Oui	Non		Oui
2013-10-02 03:12:03	1	170	68	40-49	Le jour (entre 7H et 20H)	Entre 12H et 14H, L'après-midi (14H-18H), En début de soirée (18H-20H)	3 à 6 h	6 à 9 h	3	79ème UTMB 2007 11e Ronda del Cims 2011 75ème GRR 2011	Entre 1 et 2h	22h	Non	6	Non	Non	Non			2	5	0	0	1	Entre 6 et 7	Entre 6 et 7	Entre 6 et 7	Non	Je n'ai pas la possibilité matérielle de la faire		Oui		20 minutes	Non	Je n'ai pas la possibilité matérielle de la faire		Oui		20 minutes	Non	Je n'ai pas la possibilité matérielle de la faire		Oui		30 minutes	Oui	Non		Oui
2013-10-02 05:25:03	1	174	82	30-39	Le jour (entre 7H et 20H)	Le matin (7H-12H), En début de soirée (18H-20H)	6 à 9 h	9 à 12 h	3	2012 Bellevaux 2012 75 km citadelle lille 2011 Origole 2008 CCC	Entre 2 et 3h	Minuit	Non	3	Non	Oui	Non			0	0	6	0	4	Entre 7 et 8	Entre 7 et 8	Entre 7 et 8	Non	Je n'ai pas le temps		Oui		1	Non	Je n'ai pas le temps		Oui		1	Non	Je n'ai pas le temps		Oui		1	Oui	Oui	24 h0 de course départ 0h00, sieste de 15 minutes	Non
2013-10-02 05:34:34	1	186	71	40-49	Le jour (entre 7H et 20H)	Le matin (7H-12H), En début de soirée (18H-20H)	6 à 9 h	12 à 15 h	3	1er ultra sancy 2007 14éme CCC 2006	Entre 1 et 2h	22h	Non	5	Oui	Oui	Non			0	0	3	0	0	Entre 7 et 8	Entre 8 et 9	Entre 8 et 9	Non	Je n'ai pas le temps		Non	Je n'en ressens pas le besoin		Non	Je n'ai pas le temps		Non	Je n'en ressens pas le besoin		Non	Je n'ai pas le temps		Non	pas l'habitude		Oui	Non		Non
2013-10-02 05:36:03	1	179	76	30-39	Le jour (entre 7H et 20H)	Le matin (7H-12H), L'après-midi (14H-18H), Le soir (après 20H)	3 à 6 h	6 à 9 h	3	5 UTMB dans le top 100 (pas dans le top 50) (2003 à 2008) Traversée des Pyrénées : 10 jours 10 heures (4h de dodo par nuit) 29h09 à l'UTMB Quelques top 5/10 sur des ultra trail confidentiel (6666 occitane, Grand Raid Occitan, 100 km de la drome, Grand Raid du ventoux ...)	Entre 1 et 2h	plus tard que minuit	Non		Non	Non	Non			0	5	0	0	0	Entre 6 et 7	Entre 7 et 8	Entre 7 et 8	Non	Je n'en ressens pas le besoin		Non	Je n'en ressens pas le besoin		Non			Non	Je n'en ressens pas le besoin		Non	Je n'en ressens pas le besoin		Non	Je n'en ressens pas le besoin		Oui	Non		Non
2013-10-02 05:51:34	1	173	75	40-49	Le jour (entre 7H et 20H)	Cela varie chaque jour	Moins de 3 h	3 à 6 h	3	UTMB 2009 Endurance trail 2012	< 1	jamais après 20h	Oui	3	Non	Non	Non			0	3	0	0	0	Entre 7 et 8	Entre 7 et 8	Entre 7 et 8	Non	Je n'en ressens pas le besoin		Non	Je n'en ressens pas le besoin		Non	Je n'en ressens pas le besoin		Non	Je n'en ressens pas le besoin		Non	Je n'en ressens pas le besoin		Non	Je n'en ressens pas le besoin		Oui	Non		Oui
2013-10-02 05:54:56	1	169	57	30-39	Le jour (entre 7H et 20H)	Avant 7H, L'après-midi (14H-18H), Le soir (après 20H)	6 à 9 h	9 à 12 h	3	Marche de la bièvre 2010 (50km / 7h - marche rapide) Grand Trail du Nord 2011 (150 km / 28h - ultra-trail)	Entre 1 et 2h	Minuit	Non	1	Non	Non	Non		Me blottir contre ma femme ...	Je ne fume pas	4	1	0,5	0,000001	Entre 6 et 7	Entre 7 et 8	Entre 7 et 8	Non	Je n'ai pas le temps		Non	Je n'ai pas le temps		Non	Je n'ai pas le temps		Non	Je n'ai pas le temps		Non	Je n'ai pas le temps		Non	Je n'ai pas le temps		Oui	Non		Non
2013-10-02 06:01:38	1	178	71	18- 29	Le jour (entre 7H et 20H)	Avant 7H, En début de soirée (18H-20H), Le soir (après 20H)	6 à 9 h	9 à 12 h	3	24h : 155km UTMB 2012 : 18h Endurance Ultra Trail Millau : 18h Liège > Bruxelles 160km : 24h UT4M 2013 : 38h ; 38e	Entre 1 et 2h	22h	Non	2	Non	Non	Non		Tisanne de temps en temps	0	3	0	0	0,5	Entre 7 et 8	Entre 8 et 9	Entre 8 et 9	Non	Je n'ai pas la possibilité matérielle de la faire		Oui		30	Non	Je n'ai pas la possibilité matérielle de la faire		Oui		30	Non	Je n'ai pas la possibilité matérielle de la faire		Oui		30	Oui	Oui	24h : 2x micro sieste 15min UT4M : tentative 15min (trop de bruit). +2x 5min en nature	Non
2013-10-02 07:33:37	1	181	71	30-39	La nuit	Cela varie chaque jour	9 à 12 h	Plus de 15 h	2	3e moins hard 2010 3e GRP 2011 (80km) 1er Trail des cretes (allobroges) 2012 2e uttj 2012 14e CCC 2012 1er Cote roannaise 2013 1er UTPMA 2013 2e UT4M 2013	< 1	je ne regarde jamais d'écran	Non	7	Non	Non	Non			0	2	1	0	0	Entre 6 et 7	Entre 7 et 8	Entre 7 et 8	Oui		2h	Non	Je n'en ressens pas le besoin		Oui		2h	Non			Non	Je n'en ressens pas le besoin		Non	Je n'en ressens pas le besoin		Oui	Non		Non
2013-10-02 07:37:12	2	161	53	50- 59	Le jour (entre 7H et 20H)	Entre 12H et 14H, En début de soirée (18H-20H)	6 à 9 h	6 à 9 h	5 et +	2013 Eiger Ultra Trail 18h47 pour 90 km	< 1	23h	Non	20 ans	Non	Non	Non			0	3	1	0	0	Entre 8 et 9	Entre 8 et 9	Entre 8 et 9	Non	Je n'en ressens pas le besoin		Non	Je n'en ressens pas le besoin		Non	Je n'en ressens pas le besoin		Non	Je n'en ressens pas le besoin		Non	Je n'en ressens pas le besoin		Non	Je n'en ressens pas le besoin		Oui	Non		Non
2013-10-02 08:16:03	1	175	80	30-39	Le jour (entre 7H et 20H)	Avant 7H, En début de soirée (18H-20H)	3 à 6 h	12 à 15 h	3	UTMB 2007 (232e, 32h52)	Entre 1 et 2h	21h	Non	1	Non	Oui	Non			0	0	4	0	1	Entre 8 et 9	Entre 9 et 10	Entre 8 et 9	Non	Je n'ai pas le temps		Oui		1	Non	Je n'ai pas le temps		Oui		1	Non	Je n'ai pas le temps		Oui		1	Oui	Oui	Généralement, une ou plusieurs courtes pauses de 5-15 mn sur le bord du sentier, sur 30-35 h de course. total de 10-45 mn de sommeil.	Oui
2013-10-02 09:49:17	1	183	102	40-49	Le jour (entre 7H et 20H)	Le matin (7H-12H), Entre 12H et 14H, En début de soirée (18H-20H)	3 à 6 h	12 à 15 h	2	2012 100e maxi race annecy 18h20 2012 54e ultra tour du beaufortain	Entre 2 et 3h	22h	Non	3	Non	Oui	Non			0	1	2	0	2	Entre 6 et 7	Entre 7 et 8	Entre 8 et 9	Oui		30mn	Non	Je n'en ressens pas le besoin		Non	Je n'ai pas le temps		Oui		30mn	Non	Je n'ai pas le temps		Oui		30mn	Oui	Non		Non
2013-10-02 09:55:37	1	184	70	40-49	Le jour (entre 7H et 20H)	Entre 12H et 14H, Le soir (après 20H)	3 à 6 h	6 à 9 h	2	2009 : Ecotrail Paris 80 km - 7h34 - 35ème 2009 : Origole 75 km - 9h50 - 9ème 2011 : CCC - 13h52 - 85ème 2012 : GRR - 45h47 - 180ème 2013 : UTMB - 32h16 - 194ème	Entre 2 et 3h	23h	Non	3	Oui	Non	Non			0	2	0	0	0	Entre 6 et 7	Entre 7 et 8	Entre 7 et 8	Non	Je n'ai pas la possibilité matérielle de la faire		Non	j'essaie souvent sans parvenir à m'endormir		Non	Je n'ai pas la possibilité matérielle de la faire		Non	j'essaie souvent sans parvenir à m'endormir		Non	Je n'ai pas la possibilité matérielle de la faire		Non	j'essaie souvent sans parvenir à m'endormir		Oui	Non		Oui
2013-10-02 10:18:47	1	168	69	50- 59	Le jour (entre 7H et 20H)	Cela varie chaque jour	3 à 6 h	3 à 6 h	2	utmb 2005 36h11(250ème) ;utmb 2008 38h11 (396ème) grand raid dentelles ventoux 2009 16h03 (19ème)	> 3h	23h	Non	2	Non	Non	Non			0	2	0	0	1	Entre 7 et 8	Entre 7 et 8	Entre 7 et 8	Non	Je n'en ressens pas le besoin		Non	Je n'en ressens pas le besoin		Non	Je n'en ressens pas le besoin		Non	Je n'en ressens pas le besoin		Non	Je n'en ressens pas le besoin		Non	Je n'en ressens pas le besoin		Oui	Non		Oui
2013-10-02 11:17:47	1	181	80	50- 59	Le jour (entre 7H et 20H)	Avant 7H, Le matin (7H-12H), En début de soirée (18H-20H)	3 à 6 h	6 à 9 h	1	37 H UTMB 2005 6 h 40 Sainté Lyon 1999 7h 14 Le Puy Firminy 2004 160 Km 24 h de Roche la Molière 2000	Entre 1 et 2h	21h	Non	2010	Non	Non	Non		Je ferme les yeux (lol)	0	0	1	0	0.2	Entre 7 et 8	Entre 7 et 8	Entre 8 et 9	Non	Je n'en ressens pas le besoin		Oui		une demie heure	Non	Je n'ai pas la possibilité matérielle de la faire		Oui			Non	Je n'ai pas la possibilité matérielle de la faire		Oui		1 h	Oui	Non		Oui
2013-10-02 11:24:50	1	175	64	40-49	Posté	Le matin (7H-12H), L'après-midi (14H-18H)	6 à 9 h	9 à 12 h	1	2006 9ème Sky race 2007 16ème CCC 2008 30ème CCC 2009 9ème UT beaufortain 2010 12ème maxi race 2011 4ème UT Vercors	Entre 1 et 2h	22h	Non	4	Non	Non	Non			0	3	1	0	0,3	Entre 6 et 7	Entre 7 et 8	Entre 7 et 8	Oui		20 minutes	Oui		20 minutes	Oui		20 minutes	Oui		20 minutes	Oui		20 minutes	Oui		20 minutes	Non			Non
2013-10-02 12:13:22	1	169	69	40-49	Le jour (entre 7H et 20H)	En début de soirée (18H-20H)	9 à 12 h	12 à 15 h	3	UTAubrac 2013 (23eme) Echappée belle 2013 (58 eme) UT4M (80 eme) Diagonale des fous 2009 (200eme) GRP 2011 (91eme)	Entre 2 et 3h	22h	Non	7	Non	Non	Non			0	4	0	0	0	Entre 7 et 8	Entre 8 et 9	Entre 8 et 9	Non	Je n'ai pas la possibilité matérielle de la faire		Non	Je n'en ressens pas le besoin		Non	Je n'ai pas la possibilité matérielle de la faire	1h	Non			Oui		1h	Oui		1h	Oui	Oui	GRP : 20 minutes à une base vie au bout de 24h sur 32h de course Echappée belle : 10 minutes à une base vie au bout de 16h sur 40h30	Oui
2013-10-02 12:39:12	1	184	76	50- 59	Le jour (entre 7H et 20H)	Avant 7H, Entre 12H et 14H, Le soir (après 20H)	6 à 9 h	9 à 12 h	4	utmb 2006 23eme echappe belle 2013 13 eme 1000 kil 2012	Entre 1 et 2h	23h	Non	3	Non	Non	Non		détente musculaire	0	4	0	0	0	Entre 6 et 7	Entre 7 et 8	Entre 7 et 8	Non	Je n'en ressens pas le besoin		Non	Je n'en ressens pas le besoin		Non	Je n'ai pas le temps		Oui		45mn	Non	Je n'ai pas le temps		Oui		45 mn à 1h30	Oui	Oui	tor 2012: 9h env sur 104 utmb: 0 ptit trotte 2010: 14h	Non
2013-10-02 13:27:23	1	165	60	40-49	Le jour (entre 7H et 20H)	Le matin (7H-12H), En début de soirée (18H-20H)	3 à 6 h	9 à 12 h	4	UTMB 2006 28ème Tor des Géants 2011 7ème	Entre 1 et 2h	21h	Non	20	Non	Non	Non			0	1	0	0	1	Entre 7 et 8	Entre 7 et 8	Entre 7 et 8	Non	Je n'ai pas la possibilité matérielle de la faire		Oui		15 min	Non	Je n'ai pas la possibilité matérielle de la faire		Oui		15 min	Non	Je n'ai pas la possibilité matérielle de la faire		Oui		15 min	Oui	Oui	3h30' en 2011 au Tor sur 96h28' 7h en 2013 au Tor sur 107h30' 10' à l'UTMB 2009 sur 39h	Oui
2013-10-02 13:31:41	1	165	59	50- 59	Le jour (entre 7H et 20H)	Le matin (7H-12H), Entre 12H et 14H, L'après-midi (14H-18H)	3 à 6 h	3 à 6 h	4	13ème à la Montagn'hard 2011 17ème à l'ultra du Verdon 2012 164ème à la diagonale des fous 2012 ...	Entre 1 et 2h	23h	Non	2	Non	Non	Non			0	0	0	0	0	Entre 7 et 8	Entre 8 et 9	Entre 9 et 10	Non	Je n'ai pas la possibilité matérielle de la faire		Oui		1/2h	Non	Je n'ai pas la possibilité matérielle de la faire		Oui		1/2h	Non	Je n'ai pas la possibilité matérielle de la faire		Oui		1/2h	Oui	Non		Oui
2013-10-02 13:48:03	2	165	54	40-49	Le jour (entre 7H et 20H)	Cela varie chaque jour	9 à 12 h	12 à 15 h	2	2010	Entre 1 et 2h	23h	Non	1	Non	Non	Non			0	3	1	0	0	Entre 6 et 7	Entre 7 et 8	Entre 7 et 8	Non	Je n'ai pas le temps		Non	Je n'en ressens pas le besoin		Non	Je n'ai pas le temps		Oui		30 minutes	Non	Je n'ai pas le temps		Oui		30 minutes	Oui	Non		Non
2013-10-02 13:51:47	1	187	78	40-49	Le jour (entre 7H et 20H)	Entre 12H et 14H, En début de soirée (18H-20H)	6 à 9 h	9 à 12 h	2	semi de diagonale des fous en 2008-50 eme ccc en 2007-100 eme	> 3h	22h	Oui	13	Non	Non	Non			0	3	0	0	1	< 5	< 5	< 5	Oui		15 min	Oui		15 min	Oui		15 min	Oui		15 min	Oui		15 min	Oui		15 min	Non	Non		Oui
2013-10-02 14:00:45	1	172	65	40-49	Le jour (entre 7H et 20H)	Avant 7H, Le matin (7H-12H), Entre 12H et 14H, En début de soirée (18H-20H)	3 à 6 h	6 à 9 h	2	moitié du classement en général	Entre 2 et 3h	23h	Non	20	Non	Non	Non			0	0	0	0	0	Entre 7 et 8	Entre 8 et 9	Entre 8 et 9	Non	Je n'ai pas la possibilité matérielle de la faire		Oui		20 minutes	Non	Je n'ai pas la possibilité matérielle de la faire		Oui		30	Non	Je n'ai pas la possibilité matérielle de la faire		Oui		45	Oui	Non		Oui
2013-10-02 14:16:33	1	171	66	40-49	Le jour (entre 7H et 20H)	Le matin (7H-12H), Entre 12H et 14H, Le soir (après 20H)	3 à 6 h	6 à 9 h	2	grand raid dentelles ventoux 2013 = 1er	< 1	23h	Non	10	Non	Non	Non			0	0	0	0	0	Entre 6 et 7	Entre 6 et 7	Entre 6 et 7	Non		30mn	Non			Oui			Oui		30	Oui		30	Oui		30	Oui	Non		Non
2013-10-02 15:05:05	1	175	63	40-49	Le jour (entre 7H et 20H)	L'après-midi (14H-18H), En début de soirée (18H-20H), Le soir (après 20H)	9 à 12 h	Plus de 15 h	1	5 eme UTMB 2010 10 eme champ monde 2009	Entre 2 et 3h	23h	Non	10	Non	Non	Non			0	1 à 2	1 à 2	0	0 à 1	Entre 7 et 8	Entre 8 et 9	Entre 8 et 9	Non	Je n'ai pas le temps		Non	Je n'en ressens pas le besoin		Non	Je n'ai pas le temps		Non	Je n'ai pas le temps		Non	Je n'ai pas le temps		Non	Je n'ai pas le temps		Oui	Non		Non
2013-10-02 17:12:59	1	174	78	40-49	Le jour (entre 7H et 20H)	Le matin (7H-12H), Entre 12H et 14H	6 à 9 h	9 à 12 h	3	Utmb 2006 39h12 / grand raid du morbihan 2009 26h14	Entre 1 et 2h	Minuit	Oui	5	Oui	Non	Non		Rien de spécial	0	4	1	0	0	Entre 6 et 7	Entre 6 et 7	Entre 7 et 8	Non	Je n'ai pas le temps		Oui		45'	Non	Je n'ai pas le temps		Oui		45'	Non	Je n'ai pas le temps		Oui		45'	Oui	Oui	Sur un utmb des micros sommeil de 20' - sur la ptl (110h) une grosse nuit de 2h sinon, des pauses voir siestes de 40´ x 3 par jour - je ne suis pas un gros dormeur en compèt.	Oui
2013-10-02 17:15:48	2	1, 67	67.5	40-49	Le jour (entre 7H et 20H)	Avant 7H, Le matin (7H-12H), L'après-midi (14H-18H)	6 à 9 h	9 à 12 h	1	2013: TDS (119 km, 7200 D+) en 26 heures 35 2009: Ultra Nouvelle- Calédonie (107 km, 4900 D+) 21 heures 21	Entre 1 et 2h	21h	Non	5	Non	Non	Non			0	0	0	0	0	Entre 7 et 8	Entre 8 et 9	Entre 8 et 9	Non	Je n'ai pas le temps		Oui		1 heure	Non	Je n'ai pas le temps		Non	Je n'en ressens pas le besoin		Non	Je n'ai pas le temps		Oui		1 heure 30	Oui	Non		Non
2013-10-02 22:55:05	1	175	67	40-49	Le jour (entre 7H et 20H)	Cela varie chaque jour	Plus de 15 h	Plus de 15 h	3	4éme diagonale de fous 2010 1er ultratrail Verdon 2011 1er ultrachampsaur 2011 2éme diagonale de fous 2011 2ème Cimasa 2013	Entre 1 et 2h	21h	Non	1	Oui	Oui	Non		je ferme les yeux!	0	5	0	2	1	Entre 7 et 8	Entre 7 et 8	Entre 8 et 9	Non	Je n'en ressens pas le besoin		Non	Je n'en ressens pas le besoin		Non	Je n'en ressens pas le besoin		Non	Je n'en ressens pas le besoin		Non	Je n'en ressens pas le besoin		Oui			Oui	Non	Pendant le Rntrip 440 Kms, sieste de 30 min toutes les 6 à 8 heures à partir de 40 hde course ( total 104h)	Non
2013-10-03 00:55:01	1	188	88	30-39	Le jour (entre 7H et 20H)	En début de soirée (18H-20H)	3 à 6 h	9 à 12 h	0	Je ne fais au maximum que des distances de 70km environ. Aventuriers de la Drôme, 67km, 4200 D+, 12h30 environ	Entre 2 et 3h	plus tard que minuit	Non	6	Oui	Oui	Non	parfois utilisation de phytothérapie ou homéopathie		0	4	0	0	2	Entre 5 et 6	Entre 5 et 6	Entre 9 et 10	Non	Je n'ai pas la possibilité matérielle de la faire		Oui		20 minutes	Non	Je n'ai pas le temps		Oui		30 min	Non	Je n'ai pas le temps		Oui		1h	Non			Non
2013-10-03 01:59:33	1	192	76	18- 29	Le jour (entre 7H et 20H)	Le matin (7H-12H), En début de soirée (18H-20H)	3 à 6 h	9 à 12 h	2	1er espoir UTMB 2011 et 2012 (179ème) 32h40 UTMB 2013 (212ème)	> 3h	22h	Non	2	Non	Non	Non		Je m'allonge sur le dos puis environs 5min plus tard je me mets sur le ventre et m'endors en 2min	0	0	1	2	0	Entre 6 et 7	Entre 8 et 9	Entre 8 et 9	Non	Je n'ai pas le temps		Non	Je n'en ressens pas le besoin		Non	Je n'ai pas le temps		Non			Non	Je n'ai pas le temps		Oui		20min	Oui	Non		Oui
2013-10-03 02:15:12	1	175	68	30-39	Le jour (entre 7H et 20H)	Avant 7H, Entre 12H et 14H, L'après-midi (14H-18H)	3 à 6 h	3 à 6 h	1	2013 : echappée belle 72eme 2012: GRR 390eme	Entre 1 et 2h	22h	Non	5	Non	Oui	Non			0	0	0	33 cl	1	Entre 7 et 8	Entre 7 et 8	Entre 7 et 8	Non	Je n'ai pas la possibilité matérielle de la faire		Oui		30mn	Non	Je n'ai pas la possibilité matérielle de la faire		Oui		30	Non	Je n'ai pas la possibilité matérielle de la faire		Oui		30mn	Oui	Non		Oui
2013-10-03 02:25:01	1	179	80	50- 59	Le jour (entre 7H et 20H)	Le matin (7H-12H), L'après-midi (14H-18H), Le soir (après 20H)	3 à 6 h	12 à 15 h	1	174eme grand raid Réunion 2008	Entre 1 et 2h	21h	Non	4	Non	Non	Non			0	4	0	0	0	Entre 7 et 8	Entre 7 et 8	Entre 7 et 8	Non	Je n'ai pas le temps		Oui		1h	Non	Je n'ai pas le temps		Oui		1h	Non	Je n'ai pas le temps		Oui		1h	Oui	Non		Oui
2013-10-03 02:38:59	1	192	82.8	30-39	Le jour (entre 7H et 20H)	Entre 12H et 14H, En début de soirée (18H-20H)	9 à 12 h	12 à 15 h	1	2010 CCC : 138 17h27	< 1	22h	Non	2011	Non	Non	Non			0	0	0	0	0	Entre 9 et 10	Entre 9 et 10	Entre 9 et 10	Non	Je n'ai pas le temps		Non	Je n'en ressens pas le besoin		Non	Je n'en ressens pas le besoin		Non	Je n'en ressens pas le besoin		Non	Je n'en ressens pas le besoin		Oui		2	Oui	Non		Non
2013-10-03 02:39:40	1	178	82	50- 59	Le jour (entre 7H et 20H)	En début de soirée (18H-20H)	6 à 9 h	9 à 12 h	2	utmb 2009	Entre 1 et 2h	22h	Non	10	Non	Non	Non			0	3	1	0,3	0,3	Entre 6 et 7	Entre 7 et 8	Entre 7 et 8	Non	Je n'en ressens pas le besoin		Non			Non	Je n'en ressens pas le besoin		Oui		30 min	Non	Je n'en ressens pas le besoin		Oui		30 min	Oui	Non		Oui
2013-10-03 02:48:52	1	180	78	30-39	Le jour (entre 7H et 20H)	Le matin (7H-12H), En début de soirée (18H-20H), Le soir (après 20H)	3 à 6 h	12 à 15 h	1	1 seul résultat	Entre 1 et 2h	Minuit	Non	3	Non	Non	Non			0	0	0	0	0	Entre 6 et 7	Entre 6 et 7	Entre 7 et 8	Oui		40	Oui		40	Oui		40	Oui		40	Oui		40	Oui		40/60	Oui	Non		Non
2013-10-03 02:57:29	1	176	68	30-39	Le jour (entre 7H et 20H)	Entre 12H et 14H, En début de soirée (18H-20H)	9 à 12 h	12 à 15 h	1	2011 - 17h40 105km Challenge Charles & Alice 2013 - 18h36 108km Challenge Charles & Alice	Entre 1 et 2h	22h	Non	1	Non	Non	Non			0	2	0	0	0	Entre 7 et 8	Entre 7 et 8	Entre 8 et 9	Non	Je n'en ressens pas le besoin		Non	Je n'en ressens pas le besoin		Oui		15min	Oui		15min	Oui	Je n'ai pas le temps	15min	Oui		15min	Non			Non
2013-10-03 02:58:12	1	176	68	30-39	Le jour (entre 7H et 20H)	Entre 12H et 14H, En début de soirée (18H-20H)	9 à 12 h	12 à 15 h	1	2011 - 17h40 105km Challenge Charles & Alice 2013 - 18h36 108km Challenge Charles & Alice	Entre 1 et 2h	22h	Non	1	Non	Non	Non			0	2	0	0	0	Entre 7 et 8	Entre 7 et 8	Entre 8 et 9	Non	Je n'en ressens pas le besoin		Non	Je n'en ressens pas le besoin		Oui		15min	Oui		15min	Oui	Je n'ai pas le temps	15min	Oui		15min	Non			Non
2013-10-03 02:59:59	2	165	56	40-49	Posté	Le matin (7H-12H), L'après-midi (14H-18H)	3 à 6 h	6 à 9 h	1	Raid du Morbihan (86km) mon 1er : 14h17 2013	Entre 1 et 2h	22h	Oui	10	Non	Oui	Non			0	3	0	0	0	Entre 5 et 6	Entre 5 et 6	Entre 6 et 7	Non	Je n'en ressens pas le besoin		Non	Je n'en ressens pas le besoin		Non	Je n'en ressens pas le besoin		Non	Je n'en ressens pas le besoin		Non	Je n'en ressens pas le besoin		Non			Oui	Non		Non
2013-10-03 03:00:26	1	179	71	18- 29	Le jour (entre 7H et 20H)	Le matin (7H-12H), L'après-midi (14H-18H), En début de soirée (18H-20H)	9 à 12 h	12 à 15 h	3	Verdon 101km (2012) : 20h45 - 32ème scratch Beaufortain 103km (2013) : 19h50 - (62eme scratch)	Entre 1 et 2h	22h	Non	2	Non	Non	Non			0	1	3	0	1	Entre 7 et 8	Entre 8 et 9	Entre 8 et 9	Non	Je n'ai pas la possibilité matérielle de la faire		Oui		30	Non	Je n'ai pas la possibilité matérielle de la faire		Oui		45	Oui		15	Oui		1h	Oui	Non		Non
2013-10-03 03:03:18	1	181	73	30-39	Le jour (entre 7H et 20H)	Entre 12H et 14H, Le soir (après 20H)	6 à 9 h	3 à 6 h	1	UTMB 2013 43h	< 1	21h	Non	1	Non	Non	Non			0	0	0	0	0	Entre 8 et 9	Entre 8 et 9	Entre 8 et 9	Non	Je n'ai pas la possibilité matérielle de la faire		Non	Je n'ai pas le temps		Non	Je n'ai pas le temps		Non	Je n'ai pas le temps		Non	Je n'ai pas le temps		Non	Je n'ai pas le temps		Oui	Non		Oui
2013-10-03 03:03:38	1	184	69	30-39	Le jour (entre 7H et 20H)	Le matin (7H-12H), En début de soirée (18H-20H)	3 à 6 h	6 à 9 h	1	Matagalls - Montserrat 2012 et 2013 (19h)	> 3h	23h	Non	1	Non	Non	Non			0	0	0	0	1	Entre 6 et 7	Entre 8 et 9	Entre 8 et 9	Non	Je n'en ressens pas le besoin		Non	Je n'en ressens pas le besoin		Non	Je n'en ressens pas le besoin		Non	Je n'en ressens pas le besoin		Non	Je n'en ressens pas le besoin		Non	Je n'en ressens pas le besoin		Oui	Non		Non
2013-10-03 03:05:27	1	190	80	30-39	Le jour (entre 7H et 20H)	Le matin (7H-12H)	3 à 6 h	3 à 6 h	1	2006 : semi raid La Réunion 2007 : arc en ciel La Réunion 2008 : semi raid La Ruénion 2009 : Grand raid La Réunion 2010 :arc en ciel La Réunion 2011 : grand raid La Réunion 2012 : arc en ciel La Réunion 2013 : Eco Trail de PAris	Entre 2 et 3h	22h	Non	6 mois	Non	Non	Non		lire pour s'endormir	0	0	2	0	1	Entre 7 et 8	Entre 7 et 8	Entre 8 et 9	Non	Je n'ai pas le temps		Non			Non	Je n'ai pas le temps		Oui		1h	Non	Je n'ai pas le temps		Oui		1h	Oui	Non		Oui
2013-10-03 03:16:19	1	183	78	40-49	Le jour (entre 7H et 20H)	Entre 12H et 14H, En début de soirée (18H-20H)	3 à 6 h	6 à 9 h	1	2012: 103km 6200m en 21h34 2013: 103km 6200m en 20h37	Entre 1 et 2h	22h	Non	13	Non	Non	Non			0	5	1	0	0	Entre 7 et 8	Entre 7 et 8	Entre 8 et 9	Non	Je n'en ressens pas le besoin		Non	Je n'en ressens pas le besoin		Non			Non			Non			Non			Non			Non
2013-10-03 03:20:07	1	181	72	50- 59	Le jour (entre 7H et 20H)	Le matin (7H-12H), L'après-midi (14H-18H), En début de soirée (18H-20H)	6 à 9 h	12 à 15 h	3	7 utb 2010/ 6 trail verbier 2011/ 23 UTMB 2011/ 7 trail de la drome 105 km en 2013 / 10 trail verbier 2013	> 3h	23h	Non	25	Non	Oui	Non			0	0	0	0	0	Entre 6 et 7	Entre 7 et 8	Entre 8 et 9	Oui		40mn	Oui		60 mn	Oui		40 mn	Oui		60 mn	Oui		40 mn	Oui		1 h 30	Oui	Non		Non
2013-10-03 03:27:11	1	176	68	> 60	Le jour (entre 7H et 20H)	Le matin (7H-12H), En début de soirée (18H-20H)	3 à 6 h	6 à 9 h	3	Grand trail du Nord 2010 - 20° 22h04 Eco trail de Paris 2012 - 559° 9h45	< 1	23h	Oui	5	Non	Non	Non			0	2	1	0	0,5	Entre 7 et 8	Entre 7 et 8	Entre 8 et 9	Non	Je n'en ressens pas le besoin		Oui		20'	Non	Je n'ai pas le temps		Oui		20'	Oui		20'	Oui		45'	Oui	Non		Non
2013-10-03 03:27:47	1	173	66	30-39	Le jour (entre 7H et 20H)	Entre 12H et 14H, En début de soirée (18H-20H)	6 à 9 h	9 à 12 h	2	107eme en 36h55 sur le 160km du GRP (2013) 129eme en 15h sur le 80km du GRP (2012)	Entre 1 et 2h	21h	Non	1	Non	Non	Non			0	3	1	2	0	Entre 6 et 7	Entre 7 et 8	Entre 7 et 8	Non	Je n'ai pas le temps		Non	je ne prend pas le temps		Non	Je n'ai pas le temps		Non	Je n'ai pas le temps		Non	Je n'ai pas le temps		Non	Je n'ai pas le temps		Oui	Oui	je me suis suis endormie 2x10min sur un banc a un ravito	Non
2013-10-03 03:32:24	1	180	75	50- 59	Le jour (entre 7H et 20H)	Cela varie chaque jour	3 à 6 h	9 à 12 h	1	43h utmb 2006	Entre 1 et 2h	22h	Oui	5	Non	Oui	Oui	Donormyl		0	6	0	0	0	Entre 6 et 7	Entre 7 et 8	Entre 7 et 8	Oui		10	Non	Je n'ai pas le temps		Oui		10	Non	Je n'ai pas le temps		Oui		10	Non	Je n'en ressens pas le besoin		Non	Non		Oui
2013-10-03 03:48:17	1	170	62	40-49	Le jour (entre 7H et 20H)	Entre 12H et 14H	3 à 6 h	9 à 12 h	1	21h45 la CCC en 2012	Entre 1 et 2h	22h	Non	13	Non	Non	Non			0	5	0	0	1	Entre 7 et 8	Entre 8 et 9	Entre 8 et 9	Non	Je n'ai pas la possibilité matérielle de la faire		Oui		30mn	Non	Je n'ai pas la possibilité matérielle de la faire		Oui		30mn	Non	Je n'ai pas la possibilité matérielle de la faire		Oui		30mn	Oui	Non		Non
2013-10-03 03:50:47	1	184	70	30-39	Le jour (entre 7H et 20H)	Le matin (7H-12H), En début de soirée (18H-20H), Cela varie chaque jour	Moins de 3 h	3 à 6 h	4	(temps au scratch) Tor des Géants 2011 :16ème Grand Raid de la Réunion 2012 : 90 scratch Ronda del Cims 2012 : 29-30 Ultradraille 2013 : 4 Annecime 2009: 19-20	Entre 1 et 2h	plus tard que minuit	Non	0.5	Non	Non	Non		je me couche quand je suis épuisé et que je pique du nez	0	0.25 (parfois je bois du café, parfois pas du tout, moyenne donc)	1	0	0.25	Entre 6 et 7	Entre 7 et 8	Entre 7 et 8	Non	Je n'en ressens pas le besoin		Non	Je n'en ressens pas le besoin		Non		20 min	Oui		20 min	Oui		13 min	Oui		20 min	Oui	Oui	si je passe une nuit en course, je ferai probablement une sieste de 20-30 minutes. Je considère que sur 28h de course, je peux m'en tirer avec cette dose de sommeil. Si moins de 20h, je ne dormirai probablement pas du tout. Après 20h, la probabilité que je fasse une seconde sieste augment mais n'est pas systématique. Quand je parle de sieste, elle peut avoir lieu pendant la nuit ou pendant la jou…	Oui
2013-10-03 03:53:37	1	181	66	30-39	Le jour (entre 7H et 20H)	En début de soirée (18H-20H)	9 à 12 h	Plus de 15 h	0	aucun	Entre 1 et 2h	Minuit	Oui	6	Non	Oui	Non			4	0	0	0	2	Entre 6 et 7	Entre 7 et 8	Entre 6 et 7	Non	Je n'ai pas la possibilité matérielle de la faire		Non	Je n'ai pas le temps		Non	Je n'ai pas le temps		Non	Je n'ai pas le temps		Non	Je n'ai pas le temps		Non	Je n'ai pas le temps		Non			Non
2013-10-03 03:54:09	1	175	70	40-49	Le jour (entre 7H et 20H)	Avant 7H, Le matin (7H-12H), En début de soirée (18H-20H), Le soir (après 20H), Cela varie chaque jour	9 à 12 h	9 à 12 h	3	finisher TOE 2011, UTMB 2012, échapée Belle 2013	Entre 2 et 3h	23h	Non	2	Oui	Oui	Non	Je prends avant un ultra 1 imovane sinon, je ne dors pas du tout la nuit avant		0	0	0	0	0	Entre 6 et 7	Entre 7 et 8	Entre 7 et 8	Non	Je n'ai pas le temps		Oui		1	Non	Je n'ai pas le temps		Oui		1h	Non	Je n'ai pas le temps		Oui		1h	Oui	Non		Oui
2013-10-03 03:55:35	1	180	77	30-39	Le jour (entre 7H et 20H)	Avant 7H, Le matin (7H-12H), Entre 12H et 14H	3 à 6 h	9 à 12 h	0	Templiers 2011: 14h Maxi-race 2012: arrêté au 48km-9h de course Saintelyon 2012: 10h30	Entre 2 et 3h	23h	Oui	8	Non	Non	Non			0	2	4	0	0	Entre 6 et 7	Entre 7 et 8	Entre 7 et 8	Non	Je n'en ressens pas le besoin		Non	Je n'en ressens pas le besoin		Non	Je n'ai pas le temps		Non	Je n'en ressens pas le besoin		Non	Je n'ai pas le temps		Oui		1h	Oui	Non		Non
2013-10-03 03:59:29	2	154	45	40-49	Le jour (entre 7H et 20H)	Entre 12H et 14H, En début de soirée (18H-20H), Cela varie chaque jour	6 à 9 h	12 à 15 h	3	echappée belle 3em fille 2013 CCC 2010 412em scratch	< 1	je ne regarde jamais d'écran	Non	2	Non	Oui	Non			0	2	1	0	0	< 5	< 5	< 5	Non	Je n'ai pas le temps		Non	Je n'en ressens pas le besoin		Non	Je n'ai pas le temps		Non		1	Non	Je n'ai pas le temps		Oui		2	Oui	Oui	echappee belle 40h28, 2h de sommeil (en refuge) grand raid de la réunion 63h, 1h30 sommeil (sur une table, et par terre) CCC 23H, 0 sommeil	Oui
2013-10-03 04:00:47	1	177	70	40-49	Posté	Le matin (7H-12H)	9 à 12 h	Plus de 15 h	5 et +	2008 12eme GRR 2009 Victoire VERDON CANYON 2010 10ème Sultan Marathon des sables 2011 3ème GRPyrenees 2012 3ème UTAT 2013 Victoire SIGNES	Entre 2 et 3h	22h	Non	8	Non	Non	Non			0	2	0	1	0	Entre 5 et 6	Entre 7 et 8	Entre 8 et 9	Non	Je n'ai pas la possibilité matérielle de la faire		Oui		20'-30'	Non			Oui			Non	Je n'ai pas la possibilité matérielle de la faire	20-30'	Non	Je n'en ressens pas le besoin		Oui	Non	GRR 2008 = 26h GRP 2011 = 24H15	Non
2013-10-03 04:03:52	1	183	74.5	30-39	Le jour (entre 7H et 20H)	L'après-midi (14H-18H), En début de soirée (18H-20H)	Moins de 3 h	3 à 6 h	0	Pas encore pour cette anne Debut des ultra en 2014	Entre 1 et 2h	23h	Oui	10	Non	Non	Non			0	3	1	0	0	Entre 6 et 7	Entre 7 et 8	Entre 7 et 8	Non	Je n'en ressens pas le besoin		Non	Je n'en ressens pas le besoin		Non	Je n'en ressens pas le besoin		Non	Je n'en ressens pas le besoin		Non	Je n'en ressens pas le besoin		Non	Je n'en ressens pas le besoin		Non			Non
2013-10-03 04:04:22	1	176	67	30-39	Le jour (entre 7H et 20H)	Le matin (7H-12H), L'après-midi (14H-18H), En début de soirée (18H-20H)	6 à 9 h	9 à 12 h	0	Je n'ai pas fait d'ultra-trail cette année, mais l'objectif d'en réaliser 2 l'année prochaine pour 2014. Cette année, le plus long fût le trail tour des Fiz 63Km et 5000m D+.	Entre 2 et 3h	21h	Oui	2005	Non	Oui	Non			0	2	1	0	0	Entre 6 et 7	Entre 8 et 9	Entre 8 et 9	Non	Je n'ai pas la possibilité matérielle de la faire		Non	Je n'en ressens pas le besoin		Non	Je n'ai pas la possibilité matérielle de la faire		Oui		entre 30' et 1 heure selon l'état de fatigue	Non	Je n'ai pas la possibilité matérielle de la faire		Oui		entre 30' et 1 heure selon l'état de fatigue	Non	Non		Non
2013-10-03 04:22:09	1	181	68	40-49	Le jour (entre 7H et 20H)	Entre 12H et 14H, Le soir (après 20H), Cela varie chaque jour	3 à 6 h	6 à 9 h	2	tour beaufortain 2010 (56eme/136) grand duc 2012 (48/107) TDS 2012 (189/631)	Entre 1 et 2h	23h	Non	10	Non	Non	Non			0	3	1	0	0.2	Entre 7 et 8	Entre 7 et 8	Entre 8 et 9	Non	Je n'ai pas la possibilité matérielle de la faire		Oui		15'	Non	Je n'ai pas la possibilité matérielle de la faire		Oui		15'	Non	Je n'ai pas la possibilité matérielle de la faire		Oui		15'	Oui	Oui	3 siestes de 20-25 minutes durant la matinée (allongé dans l'herbe entre 2 ravitos, ou sur un banc au ravito) mais c'était trop tard: jamais pu récupérer de la nuit blanche -> abandon en début d'après-midi	Non
2013-10-03 04:34:00	1	179	80	40-49	Le jour (entre 7H et 20H)	Avant 7H, Entre 12H et 14H	6 à 9 h	9 à 12 h	3	GRP160 2013 46h Challenge du Verdon 100Km 2013 26h Ultra endurance des templiers 2012 21h Maxirace Annecy 2012 17h	Entre 1 et 2h	21h	Oui	7	Non	Non	Non			0	1	2	0	0	Entre 7 et 8	Entre 7 et 8	Entre 7 et 8	Non	Je n'ai pas le temps		Non	Je n'ai pas le temps		Non	Je n'ai pas le temps		Non	Je n'ai pas le temps		Non	Je n'ai pas le temps		Non	Je n'ai pas le temps		Oui	Non		Oui
2013-10-03 04:34:05	1	187	86	30-39	Le jour (entre 7H et 20H)	Entre 12H et 14H, En début de soirée (18H-20H)	6 à 9 h	9 à 12 h	1	CCC 2012 : 17h40 6000D 2012 (tronquée) : 7h28 Templiers 2012 : 13h16	Entre 2 et 3h	Minuit	Non	5	Non	Oui	Non			0	0	3	0	2	Entre 6 et 7	Entre 7 et 8	Entre 7 et 8	Non	Je n'ai pas le temps		Non	Je n'en ressens pas le besoin		Non	Je n'ai pas le temps		Non	Je n'en ressens pas le besoin		Non	Je n'ai pas le temps		Non	Je n'en ressens pas le besoin		Oui	Non		Non
2013-10-03 04:34:59	2	166	58	30-39	Le jour (entre 7H et 20H)	Avant 7H, Le matin (7H-12H), Entre 12H et 14H, L'après-midi (14H-18H), Le soir (après 20H), Cela varie chaque jour	6 à 9 h	9 à 12 h	2	2010 : 3 reprise UTMB, 3 6000D 2011 : abandon TDS 2012 : TDS 1ere Femme 2013 : abandon CCC	Entre 1 et 2h	23h	Non	5	Non	Oui	Non	des fois decontractyl et euphytose	ecouter de la musqiue	0	0	4	0	0	< 5	Entre 6 et 7	Entre 7 et 8	Non	Je n'ai pas le temps		Non	je profite du tempslibre pour faire autre chose		Non	Je n'ai pas le temps		Non	Je n'en ressens pas le besoin	0	Non	Je n'ai pas le temps		Oui		1h	Oui	Oui	microsiestes de 2min 3 fois	Non
2013-10-03 04:44:52	1	173	65	18- 29	Le jour (entre 7H et 20H)	Avant 7H, Le soir (après 20H), Cela varie chaque jour	6 à 9 h	9 à 12 h	0	--	Entre 1 et 2h	23h	Non	15	Non	Non	Non			0	1	0	2	1	Entre 6 et 7	Entre 7 et 8	Entre 7 et 8	Non	Je n'ai pas la possibilité matérielle de la faire		Non	Je n'en ressens pas le besoin		Non	Je n'ai pas le temps		Non	Je n'en ressens pas le besoin		Non	Je n'ai pas le temps		Oui		1h	Non	Non		Non
2013-10-03 04:48:49	1	176	76	18- 29	Le jour (entre 7H et 20H)	Le matin (7H-12H), En début de soirée (18H-20H), Cela varie chaque jour	6 à 9 h	9 à 12 h	1	1000 sur la saintelyon et en 2014 la ccc sinon jusqua maintenent jai fait que des 50 km avec 4OOO m	Entre 1 et 2h	22h	Oui	2	Non	Non	Non			0	1	2	1	0	Entre 7 et 8	Entre 7 et 8	Entre 7 et 8	Non	Je n'en ressens pas le besoin		Non	Je n'en ressens pas le besoin		Non	Je n'en ressens pas le besoin		Non	Je n'en ressens pas le besoin		Non	Je n'en ressens pas le besoin		Non	Je n'en ressens pas le besoin		Oui	Non		Non
2013-10-03 04:49:17	1	180	69	30-39	Le jour (entre 7H et 20H)	Avant 7H, Le soir (après 20H), Cela varie chaque jour	9 à 12 h	12 à 15 h	3	TRE RIFUGI VALPELLICE TRAIL - 54,2 KM 8h27min28sec	< 1	21h	Oui	2	Non	Non	Non		M'etendre!	0	2	1	0	1	Entre 6 et 7	Entre 8 et 9	Entre 8 et 9	Non	Je ne l'aime pas		Non	Je ne l'aime pas		Non	Je ne l'aime pas		Non	Je ne l'aime pas		Non	Je ne l'aime pas		Non	Je ne l'aime pas		Oui	Non		Non
2013-10-03 04:56:29	1	173	70	40-49	Le jour (entre 7H et 20H)	Entre 12H et 14H, En début de soirée (18H-20H)	3 à 6 h	6 à 9 h	0	premier ultra en juin 2014	Entre 1 et 2h	22h	Non	2	Non	Non	Non			0	3	1	0	0	Entre 7 et 8	Entre 8 et 9	Entre 7 et 8	Non	Je n'en ressens pas le besoin		Oui		30mn	Oui		30mn	Oui		30mn	Oui		30mn	Oui		30mn	Non			Non
2013-10-03 05:02:00	1	172	66	40-49	Le jour (entre 7H et 20H)	Le matin (7H-12H), En début de soirée (18H-20H)	3 à 6 h	12 à 15 h	2	UTMB 2013 : 37h13 Montagnhard 2012 : 27h54 Verbier 2011 : 22h38 Verbier 2010 : 26h54 Grand Raid Pyrénées 2009 : 39h34	Entre 2 et 3h	Minuit	Non	4	Non	Non	Non			0	0	0	0	1	Entre 6 et 7	Entre 7 et 8	Entre 7 et 8	Non	Je n'en ressens pas le besoin		Oui		30 mn	Non			Oui		30 mn	Non			Oui		1 h	Oui	Non		Oui
2013-10-03 05:07:57	1	183	74	18- 29	Le jour (entre 7H et 20H)	Entre 12H et 14H, L'après-midi (14H-18H), En début de soirée (18H-20H)	6 à 9 h	9 à 12 h	0	0	> 3h	Minuit	Non	5	Non	Non	Non			0	3	0	0	0	Entre 7 et 8	Entre 9 et 10	> 10	Non	Je n'en ressens pas le besoin		Non	Je n'en ressens pas le besoin		Non	Je n'en ressens pas le besoin		Non	Je n'en ressens pas le besoin		Oui			Non	Je n'en ressens pas le besoin		Non			Non
2013-10-03 05:09:17	1	178	65	30-39	Le jour (entre 7H et 20H)	L'après-midi (14H-18H), En début de soirée (18H-20H)	3 à 6 h	9 à 12 h	2	Ardennes Mega Trail 16h55 92kms au gps	< 1	jamais après 20h	Non	10	Non	Non	Non			0	2	1	0	1	Entre 7 et 8	Entre 8 et 9	Entre 8 et 9	Non	Je n'ai pas la possibilité matérielle de la faire		Oui		20'	Non	Je n'ai pas la possibilité matérielle de la faire		Oui		45'	Non	Je n'ai pas la possibilité matérielle de la faire		Oui		60'	Oui	Non		Non
2013-10-03 05:17:41	2	165	58	18- 29	Le jour (entre 7H et 20H)	Cela varie chaque jour	6 à 9 h	12 à 15 h	1	J'ai commencé l'ultra seulement en Aout dernier en étant pacer (donc non classée).	< 1	22h	Non	7	Non	Non	Non			0	1	0	0	0	Entre 7 et 8	Entre 8 et 9	Entre 8 et 9	Non	Je n'en ressens pas le besoin		Non	Je n'en ressens pas le besoin		Non	Je n'ai pas le temps		Non	Je n'en ressens pas le besoin		Non	Je n'ai pas le temps		Oui		1h	Oui	Non		Non
2013-10-03 05:23:11	1	169	64	40-49	La nuit	Cela varie chaque jour	9 à 12 h	Plus de 15 h	1	12ème à l'ut4m solo (90 km) 330 à la tds 2012	Entre 2 et 3h	23h	Non	2	Non	Non	Non			0	3	0	0	0	Entre 6 et 7	Entre 7 et 8	Entre 7 et 8	Non	Je n'en ressens pas le besoin		Non			Non	Je n'en ressens pas le besoin		Non	Je n'en ressens pas le besoin		Non	Je n'en ressens pas le besoin		Non	Je n'en ressens pas le besoin		Oui	Non		Non
2013-10-03 05:27:08	1	182	69	40-49	Le jour (entre 7H et 20H)	Le matin (7H-12H), Le soir (après 20H)	6 à 9 h	9 à 12 h	3	UTMB 2012. 21h27	Entre 2 et 3h	23h	Non	3	Non	Non	Non			0	1	0	0	0	Entre 6 et 7	Entre 8 et 9	Entre 8 et 9	Non	Je n'ai pas la possibilité matérielle de la faire		Non	Je n'ai pas le temps		Non	Je n'ai pas la possibilité matérielle de la faire		Non	Je n'ai pas le temps		Non	Je n'ai pas la possibilité matérielle de la faire		Oui		30 minutes	Oui	Oui	Temps de course 28h50 Durée de sommeil 30 minutes Allongé à même le sol à un ravitaillement (abri en dur) en fin de soirée.	Non
2013-10-03 05:39:14	1	178	64	30-39	Le jour (entre 7H et 20H)	Le matin (7H-12H), En début de soirée (18H-20H)	Moins de 3 h	3 à 6 h	2	UTMB 369ème Grand Duc Chartreuse 33ème SaintéLyon 170ème UTB 66ème Ardennes Méga Trail 31ème	Entre 1 et 2h	Minuit	Non	8	Non	Non	Non			0	2	0	0	0	Entre 7 et 8	Entre 8 et 9	Entre 8 et 9	Non	Je n'ai pas le temps		Non	Je n'en ressens pas le besoin		Non	Je n'ai pas le temps		Non	Je n'en ressens pas le besoin		Non	Je n'ai pas le temps		Non	Je n'en ressens pas le besoin		Oui	Non		Oui
2013-10-03 05:43:51	1	180	70	40-49	Le jour (entre 7H et 20H)	Le matin (7H-12H), En début de soirée (18H-20H)	9 à 12 h	Plus de 15 h	3	5e 24 h de trail en 2013	Entre 2 et 3h	Minuit	Oui	2	Non	Non	Non			0	2017-04-03	1	0	1	Entre 6 et 7	Entre 6 et 7	Entre 7 et 8	Non			Oui		1-2 h	Oui		20 mn	Oui		1 h	Oui		20 mn	Oui		1 h	Oui	Oui	sur un table (micro sieste de 15 mn), sous une table (30 mn mais difficile à déterminer avec exactitude), Pour ce qui concerne la durée totale, je ne m'en souviens plus.	Oui
2013-10-03 05:44:55	1	184	79	18- 29	Le jour (entre 7H et 20H)	Cela varie chaque jour	3 à 6 h	9 à 12 h	1	19h semi raid de la réunion 2010 27h tds 2013	< 1	21h	Non	4	Non	Non	Non			1	2	1	0	1	Entre 7 et 8	Entre 7 et 8	Entre 7 et 8	Oui		20	Oui		20	Oui		20	Non			Oui		20	Oui		20	Oui	Non		Non
2013-10-03 05:49:27	1	174	69	40-49	Le jour (entre 7H et 20H)	Le matin (7H-12H), Entre 12H et 14H, Le soir (après 20H)	3 à 6 h	6 à 9 h	1	2012 - Les templiers - Endurance trail 100km - 16h	Entre 1 et 2h	22h	Non	8	Oui	Oui	Non		Homéopathie	0	3	1	0	0	Entre 6 et 7	Entre 7 et 8	Entre 7 et 8	Non	Je n'ai pas le temps		Oui		15'	Non	Je n'ai pas le temps		Oui		15'	Non	Je n'ai pas le temps		Oui		30'	Non			Non
2013-10-03 05:49:40	2	165	60	18- 29	Le jour (entre 7H et 20H)	En début de soirée (18H-20H)	6 à 9 h	12 à 15 h	2	2012 - CCC 20h 2012 - La diagonale des fous 170km en 61h	< 1	22h	Non	1 ans	Non	Non	Non			0	0	0	1 ou 2	0	Entre 6 et 7	Entre 7 et 8	Entre 8 et 9	Oui		10min	Non	Je n'en ressens pas le besoin		Non	Je n'ai pas le temps		Non	Je n'en ressens pas le besoin		Non	Je n'ai pas le temps		Oui		10	Oui	Non		Oui
2013-10-03 05:53:51	1	175	63	40-49	Le jour (entre 7H et 20H)	Avant 7H, Le matin (7H-12H)	3 à 6 h	9 à 12 h	1	rien	Entre 2 et 3h	22h	Non	10	Non	Non	Non			no	2	no	no	no	Entre 7 et 8	Entre 7 et 8	Entre 7 et 8	Non	Je n'en ressens pas le besoin		Non	Je n'ai pas le temps		Non	Je n'ai pas le temps		Non	Je n'ai pas le temps		Non	Je n'ai pas le temps		Non	Je n'ai pas le temps		Oui	Non		Non
2013-10-03 05:56:11	1	175	67	30-39	Le jour (entre 7H et 20H)	Avant 7H, Entre 12H et 14H, L'après-midi (14H-18H)	3 à 6 h	6 à 9 h	2	2013 : - Echappée Bell : 78ième - Grand Duc : 44ième 2012 : - UTMB et UTTJ 2011 : - Aravis Trail et Tour de l'Oisans 2010 : - CCC et Grand trail des Ecrins 2009 : - TDS et Grand Duc 2008 : - UTMB et Tour du Beaufortain 2007 : CCC	Entre 1 et 2h	23h	Oui		Non	Non	Non		Rien	0	0	1	0	0	Entre 7 et 8	Entre 8 et 9	Entre 8 et 9	Non	Je n'en ressens pas le besoin		Non	Je n'en ressens pas le besoin		Non	Je n'en ressens pas le besoin		Non	Je n'en ressens pas le besoin		Non	Je n'en ressens pas le besoin		Non	Je n'en ressens pas le besoin		Oui	Non		Oui
2013-10-03 06:00:58	1	172	72	30-39	Le jour (entre 7H et 20H)	Avant 7H, Le soir (après 20H)	3 à 6 h	6 à 9 h	1	Abandon sur le GRP en 2012 et non présentation au départ en 2013 pour cause de grosse fatigue	< 1	22h	Non	7	Non	Non	Non			0	0	3	1	0	Entre 7 et 8	Entre 7 et 8	Entre 7 et 8	Non	Je n'ai pas la possibilité matérielle de la faire		Oui		2	Non	Je n'ai pas la possibilité matérielle de la faire		Oui		2	Non	Je n'ai pas la possibilité matérielle de la faire		Oui		2	Non			Non
2013-10-03 06:03:34	1	179	82	40-49	Le jour (entre 7H et 20H)	Entre 12H et 14H, L'après-midi (14H-18H), En début de soirée (18H-20H)	3 à 6 h	6 à 9 h	0	2013	Entre 1 et 2h	22h	Non	2	Non	Non	Non			0	5	2	0	0	Entre 7 et 8	Entre 6 et 7	Entre 7 et 8	Oui		1h	Non	Je n'en ressens pas le besoin		Non	Je n'ai pas le temps		Oui		2h	Non	Je n'ai pas le temps		Oui		2h	Non			Non
2013-10-03 06:08:06	1	181	72.5	30-39	Le jour (entre 7H et 20H)	Entre 12H et 14H, En début de soirée (18H-20H)	3 à 6 h	12 à 15 h	1	Celestrail: 8ème 2012 Diagonale des fous: 160ème 2012	< 1	jamais après 20h	Non	5	Non	Non	Non			0	1	1	0	0	Entre 7 et 8	Entre 8 et 9	Entre 8 et 9	Non	Je n'ai pas la possibilité matérielle de la faire		Oui		15 min	Non	Je n'ai pas la possibilité matérielle de la faire		Oui		15 min	Non	Je n'ai pas la possibilité matérielle de la faire		Oui		15 min	Oui	Non		Oui
2013-10-03 06:13:47	1	175	75	30-39	Le jour (entre 7H et 20H)	Entre 12H et 14H, Le soir (après 20H), Cela varie chaque jour	3 à 6 h	6 à 9 h	0	Sorti par les Barrières horaires à l'ULTRA ARDECHOIS en 2012	Entre 1 et 2h	plus tard que minuit	Non	15	Non	Oui	Non			0	0	1	0	0	Entre 5 et 6	Entre 5 et 6	Entre 6 et 7	Non	Je n'ai pas le temps		Oui		1h	Non	Je n'ai pas le temps		Oui		1h	Non	Je n'ai pas le temps		Oui		1h	Non			Non
2013-10-03 06:16:37	1	175	70	40-49	Le jour (entre 7H et 20H)	Le matin (7H-12H), En début de soirée (18H-20H), Cela varie chaque jour	6 à 9 h	12 à 15 h	0	MDS 66 EME 2001 100KM DE MILLAU 2006 10H07 100 KM BECON LES GRANITS 9H49 2003 RAID IN FRANCE 2008 10EME EMBRUNMAN 2008 12H20 120EME	Entre 1 et 2h	22h	Non	10	Non	Non	Non			0	0	1	0	1	Entre 7 et 8	Entre 7 et 8	Entre 7 et 8	Non	Je n'en ressens pas le besoin		Non	Je n'en ressens pas le besoin		Non	Je n'en ressens pas le besoin		Non	Je n'en ressens pas le besoin		Non	Je n'en ressens pas le besoin		Non	Je n'en ressens pas le besoin		Oui	Non		Oui
2013-10-03 06:21:50	1	170	60	30-39	Posté	Cela varie chaque jour	9 à 12 h	Plus de 15 h	4	16 utmb 4 endurance trail 4 ultra zugspitze	Entre 1 et 2h	21h	Non	1	Non	Non	Non			0	4	1	0	1	Entre 6 et 7	Entre 6 et 7	Entre 7 et 8	Non	Je n'ai pas le temps		Oui		30mn	Non	Je n'ai pas le temps		Oui		30mn	Non	Je n'ai pas le temps		Oui		45mn	Oui	Non		Non
2013-10-03 06:27:05	2	166	51	40-49	Le jour (entre 7H et 20H)	Avant 7H, Entre 12H et 14H, Cela varie chaque jour	6 à 9 h	9 à 12 h	0	je débute ! j'ai néanmoins remporté en 2009 une course à étapes (350km en 7 jours), le swiss jura marathon	Entre 2 et 3h	21h	Non	1	Oui	Oui	Non			0	2	0	0	0	Entre 7 et 8	Entre 8 et 9	Entre 7 et 8	Non	Je n'ai pas la possibilité matérielle de la faire		Non	Je n'ai pas la possibilité matérielle de la faire		Non	Je n'ai pas la possibilité matérielle de la faire		Non	Je n'ai pas la possibilité matérielle de la faire		Non	Je n'ai pas la possibilité matérielle de la faire		Oui		30 min	Non			Non
2013-10-03 06:28:28	1	178	70.5	18- 29	Posté	Cela varie chaque jour	6 à 9 h	9 à 12 h	2	175 eme sur l'ultra 80km Du mont Blanc et 840 sur la TDS( Traces des Ducs de Savoie) 120km	Entre 1 et 2h	22h	Non	Il y a 5mois	Non	Oui	Non			Non fumeur	0	0	5	Aucun	Entre 7 et 8	Entre 8 et 9	Entre 8 et 9	Non	Je n'en ressens pas le besoin		Non	Je n'en ressens pas le besoin		Non	Je n'en ressens pas le besoin		Non	Je n'en ressens pas le besoin		Non	Je n'en ressens pas le besoin		Non	Je n'en ressens pas le besoin		Oui	Non		Non
2013-10-03 06:34:17	1	190	86	40-49	Le jour (entre 7H et 20H)	Cela varie chaque jour	6 à 9 h	12 à 15 h	4	83ème place en 108h45 au Tor des Géants 2012	Entre 1 et 2h	23h	Non	20	Non	Non	Non			0	4	2	0	0	Entre 5 et 6	Entre 6 et 7	Entre 7 et 8	Oui		15 minutes	Oui		15 minutes	Oui		15 minutes	Oui		15 minutes	Oui		15 minutes	Oui		15 minutes	Oui	Non	Micros-sieste de 10 minutes lorsque le corps et l'esprit me l'ordonnaient.	Non
2013-10-03 06:37:16	1	192	89	40-49	Le jour (entre 7H et 20H)	Avant 7H	6 à 9 h	9 à 12 h	1	8 h 30 sur la sainté lyon	> 3h	21h	Oui	9	Non	Non	Non			0	0	1	0	0	Entre 7 et 8	Entre 7 et 8	Entre 7 et 8	Non	Je n'ai pas la possibilité matérielle de la faire		Non		0	Non	Je n'ai pas la possibilité matérielle de la faire		Oui		30	Non	Je n'ai pas la possibilité matérielle de la faire		Oui		30	Non			Non
2013-10-03 06:41:03	1	185	85	18- 29	Le jour (entre 7H et 20H)	Le matin (7H-12H), En début de soirée (18H-20H)	3 à 6 h	9 à 12 h	0	Je n'ai pas fais d'ultra encore !	Entre 1 et 2h	21h	Non	6	Non	Non	Non			0	0	1	0	0	Entre 7 et 8	Entre 7 et 8	Entre 8 et 9	Non	Je n'en ressens pas le besoin		Non	Je n'en ressens pas le besoin		Non	Je n'en ressens pas le besoin		Non	Je n'en ressens pas le besoin		Oui		30 minutes	Non	Je n'en ressens pas le besoin		Non			Non
2013-10-03 06:45:41	1	171	66	40-49	Le jour (entre 7H et 20H)	En début de soirée (18H-20H)	6 à 9 h	12 à 15 h	2	2002 : 6000D (50 km) en 7 h 20 2007 : UTMB en 40 h 30 2008 : Eco-Trail de Paris (80 km) en 8 h 27	Entre 1 et 2h	23h	Non	5	Non	Non	Non			0	0	2	0	0	Entre 7 et 8	Entre 8 et 9	Entre 8 et 9	Non	Je n'ai pas le temps		Oui		1 h	Non	Je n'ai pas le temps		Oui		1 h	Non	Je n'ai pas le temps		Oui		1 h	Oui	Oui	UTMB 2007 : 20 mn de sommeil la deuxième nuit, après environ 30 h de course (temps : 40 h 30)	Oui
2013-10-03 06:46:57	2	162	53	40-49	Le jour (entre 7H et 20H)	Le matin (7H-12H), Entre 12H et 14H, En début de soirée (18H-20H)	6 à 9 h	9 à 12 h	2	2011 Ultra des coursières 3ème féminine au scratch	< 1	22h	Non	6	Non	Non	Non			0	2	0	0	0	Entre 5 et 6	Entre 7 et 8	Entre 8 et 9	Non	Je n'en ressens pas le besoin		Non	Je n'en ressens pas le besoin		Non	Je n'en ressens pas le besoin		Non	Je n'en ressens pas le besoin		Non	Je n'en ressens pas le besoin		Non	Je n'en ressens pas le besoin		Oui	Non		Oui
2013-10-03 07:06:45	1	177	68	40-49	Le jour (entre 7H et 20H)	Avant 7H, L'après-midi (14H-18H)	9 à 12 h	Plus de 15 h	3	Vainqueur GRR 2007	Entre 1 et 2h	21h	Non		Oui	Non	Non			0	3	0	0	1	Entre 6 et 7	Entre 7 et 8	Entre 6 et 7	Oui		15	Oui			Oui			Oui			Non	Je n'ai pas le temps		Oui		15	Oui	Non		Oui
2013-10-03 07:18:10	1	173	60	18- 29	Le jour (entre 7H et 20H)	Avant 7H, Entre 12H et 14H, En début de soirée (18H-20H)	6 à 9 h	9 à 12 h	2	Templiers 2012 : 9h05 soit 201e scratch Aiguilles Rouges 2012 : 8h53 soit 81e scratch	Entre 1 et 2h	Minuit	Non	jamais	Non	Non	Non			0	2	0	0	0.125	Entre 6 et 7	Entre 7 et 8	Entre 7 et 8	Non	Je n'en ressens pas le besoin		Non	Je n'en ressens pas le besoin		Non	Je n'en ressens pas le besoin		Non	Je n'en ressens pas le besoin		Non	Je n'ai pas la possibilité matérielle de la faire		Oui		20 min ou 1.5 heures	Non			Non
2013-10-03 07:24:22	1	167	63	50- 59	Le jour (entre 7H et 20H)	Le matin (7H-12H), En début de soirée (18H-20H)	6 à 9 h	9 à 12 h	3	3eme GRP 240 en 2012 3eme PTL en 2013 90eme GRP 160 en 2011 220eme UTMB en 2008	Entre 1 et 2h	23h	Non	1	Non	Non	Non		Lecture	0	4	0	0	1	Entre 6 et 7	Entre 7 et 8	Entre 7 et 8	Non	Je n'ai pas le temps		Oui		1h	Non	Je n'ai pas le temps		Oui		1	Non	Je n'ai pas le temps		Non	Je n'ai pas le temps		Oui	Non		Oui
2013-10-03 07:39:28	1	172	72	40-49	Le jour (entre 7H et 20H)	Le matin (7H-12H), Entre 12H et 14H, En début de soirée (18H-20H)	6 à 9 h	12 à 15 h	2	2012: TDS 24h42' - Maxirace 15h24	Entre 1 et 2h	plus tard que minuit	Non	12	Non	Non	Non			0	2	0	0	0	Entre 6 et 7	Entre 7 et 8	Entre 7 et 8	Non	Je n'en ressens pas le besoin		Non	Je n'en ressens pas le besoin		Non	Je n'en ressens pas le besoin		Non	Je n'en ressens pas le besoin		Non	Je n'en ressens pas le besoin		Non	Je n'en ressens pas le besoin		Oui	Non		Non
2013-10-03 09:23:35	1	170	70	40-49	Le jour (entre 7H et 20H)	En début de soirée (18H-20H)	3 à 6 h	9 à 12 h	2	23h22 2013	Entre 1 et 2h	jamais après 20h	Oui		Non	Non	Non			0	4	0	0	0	Entre 6 et 7	Entre 6 et 7	Entre 7 et 8	Non	Je n'en ressens pas le besoin		Non	Je n'en ressens pas le besoin		Non	Je n'en ressens pas le besoin		Non	Je n'en ressens pas le besoin		Oui		20mn	Non	Je n'en ressens pas le besoin		Oui	Non		Non
2013-10-03 07:44:10	2	168	50	30-39	Le jour (entre 7H et 20H)	Le matin (7H-12H)	6 à 9 h	9 à 12 h	2	Victoire CCC 2013 Victoire 80 km du Mont-Blanc 2013	Entre 1 et 2h	21h	Non	5	Non	Non	Non			0	0	1	2	0	Entre 8 et 9	Entre 8 et 9	Entre 8 et 9	Non	Je n'ai pas le temps		Non	Je n'en ressens pas le besoin		Non	Je n'ai pas le temps		Oui		1h	Non	Je n'ai pas le temps		Oui		1h	Non			Non
2013-10-03 03:22:18	1	185	78	40-49	Le jour (entre 7H et 20H)	Cela varie chaque jour	6 à 9 h	12 à 15 h	3	Finisher sur l'Echappée Belle sans courbatures et frais. Sauf le sommeil ;) MontagnHard arrétée au 80kms (pb gastrique) J'ai commencé le trail et les ultras cette année pour l'expérience. Afin de préparer la saison 2014 qui est en cours de planification.	Entre 1 et 2h	23h	Non	2	Non	Non	Non		Je regarde Derrick ! (je plaisante)	0	3	0	0	0	Entre 7 et 8	Entre 8 et 9	Entre 8 et 9	Non	je le fais des fois	20mn	Oui		20	Non	je le fais des fois	20	Oui		20	Oui		20	Oui		20	Oui	Oui	MontagnHard (107kms-9000D+) arrêt au 80kms / 20h de course - Dormi 15 mn après 18h de course	Oui
2013-10-03 07:50:43	2	169	52	40-49	Le jour (entre 7H et 20H)	Avant 7H, Le matin (7H-12H)	3 à 6 h	6 à 9 h	3	2010 3eme feminine GRP 160 2012 3eme féminine Occitane 119 2013 1ere féminine Grand Raid Occitan 150 2013 9eme feminine Ice trail tarentaise	Entre 1 et 2h	22h	Oui	4	Non	Oui	Oui	stylnox (1/4 ou 1/2) et/ou lexomyl (1/4 ou 1/2)		0	2	0	1	0	Entre 6 et 7	Entre 7 et 8	Entre 7 et 8	Non	Je n'ai pas la possibilité matérielle de la faire		Non			Non	Je n'ai pas la possibilité matérielle de la faire		Oui		1h	Non	Je n'ai pas la possibilité matérielle de la faire		Oui		2h	Oui	Oui	GRaid Reunion 2012 : 54 h et 3 fois 1/2 heure de sommeil: 1h30	Oui
2013-10-03 07:51:47	1	174	75	30-39	Le jour (entre 7H et 20H)	Le matin (7H-12H), Le soir (après 20H)	3 à 6 h	9 à 12 h	1	2011, Grp 80km: 17h 2012, TDS 29h30 2013: GRP 160: 40h13	Entre 1 et 2h	22h	Non	10	Non	Non	Non			0	2	0	0	0	Entre 7 et 8	Entre 8 et 9	Entre 8 et 9	Non	Je n'ai pas le temps	20mn	Oui		20mn	Non	Je n'ai pas le temps		Non	Je n'en ressens pas le besoin		Non	Je n'ai pas le temps		Oui		20mn	Oui	Non		Non
2013-10-03 07:55:02	1	167	63	18- 29	Le jour (entre 7H et 20H)	Le matin (7H-12H), L'après-midi (14H-18H)	6 à 9 h	6 à 9 h	0	0	Entre 1 et 2h	22h	Non	0	Non	Non	Non		Me mettre à plat ventre	0	0	2	0	2	Entre 7 et 8	Entre 8 et 9	Entre 8 et 9	Non	Je n'ai pas le temps		Non	Je n'en ressens pas le besoin		Non	Je n'ai pas le temps		Non	Je n'en ressens pas le besoin		Non	Je n'ai pas le temps		Non	Je n'en ressens pas le besoin		Non			Non
2013-10-03 07:57:39	2	155	50	40-49	Le jour (entre 7H et 20H)	Le matin (7H-12H), L'après-midi (14H-18H), En début de soirée (18H-20H), Cela varie chaque jour	3 à 6 h	9 à 12 h	2	2012 : Maxi Race 16h14 2012 : CCC 19h18 2013 : La Boucle De Verbier 24h15	Entre 1 et 2h	22h	Oui	10	Non	Non	Non			0	4	0	0	0	Entre 6 et 7	Entre 7 et 8	Entre 7 et 8	Oui		30'	Non	Je n'en ressens pas le besoin		Oui		30'	Non	Je n'en ressens pas le besoin		Oui		1h	Oui		30' à 1h	Oui	Non		Non
2013-10-03 07:58:14	1	186	76	30-39	Posté	Le matin (7H-12H), L'après-midi (14H-18H), En début de soirée (18H-20H)	3 à 6 h	6 à 9 h	2	utmb 2007 180 eme raid golfe Morbihan 2011 1 er ccc 2012 106 eme	Entre 1 et 2h	22h	Oui	2	Non	Non	Non			0	3	0	0	0	Entre 6 et 7	Entre 7 et 8	Entre 7 et 8	Oui		30 min	Non	Je n'en ressens pas le besoin		Oui		30 min	Non	Je n'en ressens pas le besoin		Oui		30min	Oui		30min	Oui	Non		Non
2013-10-03 08:00:48	1	185	78	40-49	Le jour (entre 7H et 20H)	Le matin (7H-12H), En début de soirée (18H-20H), Cela varie chaque jour	6 à 9 h	9 à 12 h	2	18h à la ccc 2011, 31h à la transmartinique 2012	Entre 1 et 2h	22h	Oui	10	Non	Non	Non			0	2	0	0	1	Entre 7 et 8	Entre 7 et 8	Entre 7 et 8	Non	Je n'ai pas le temps	20 minutes	Non	Je n'en ressens pas le besoin		Oui		20 minutes	Non	Je n'en ressens pas le besoin		Oui		20 minutes	Non	Je n'en ressens pas le besoin		Oui	Non		Non
2013-10-03 08:01:27	2	168	50	30-39	Le jour (entre 7H et 20H)	Le matin (7H-12H)	6 à 9 h	9 à 12 h	2	Victoire CCC 2013 Victoire 80 km du Mont-Blanc 2013	Entre 1 et 2h	21h	Non	5	Non	Non	Non			0	0	1	2	0	Entre 8 et 9	Entre 8 et 9	Entre 8 et 9	Non	Je n'ai pas le temps		Non	Je n'en ressens pas le besoin		Non	Je n'ai pas le temps		Oui		1h	Non	Je n'ai pas le temps		Oui		1h	Non			Non
2013-10-03 08:10:40	1	182	69	40-49	Le jour (entre 7H et 20H)	Le matin (7H-12H), En début de soirée (18H-20H), Le soir (après 20H)	6 à 9 h	9 à 12 h	3	Mon premier ultra 19h sur 121km Mon premier 80km en 9h30 6000D en 9h40	Entre 2 et 3h	Minuit	Non	2	Non	Non	Non			0	6	0	0	2	Entre 7 et 8	Entre 8 et 9	Entre 8 et 9	Non	Je n'en ressens pas le besoin		Oui		1 heure 30	Non	Je n'en ressens pas le besoin		Oui		1 h 30	Non	Je n'en ressens pas le besoin		Oui		1h30	Non			Non
2013-10-03 08:16:11	1	174	63	50- 59	Le jour (entre 7H et 20H)	Le matin (7H-12H), L'après-midi (14H-18H)	6 à 9 h	9 à 12 h	1	CCC. Finisher (26h)	Entre 2 et 3h	23h	Non	5	Oui	Non	Non			5	3	0	0	0	Entre 6 et 7	Entre 7 et 8	Entre 8 et 9	Non	Je n'ai pas la possibilité matérielle de la faire		Oui		1	Non	Je n'ai pas la possibilité matérielle de la faire		Oui		1	Non	Je n'ai pas la possibilité matérielle de la faire		Oui		1	Oui	Non		Non
2013-10-03 08:18:40	1	180	70	30-39	Le jour (entre 7H et 20H)	Entre 12H et 14H, En début de soirée (18H-20H), Le soir (après 20H)	9 à 12 h	12 à 15 h	1	108/232	< 1	23h	Non	4	Non	Oui	Non			0	3	2	0	0	Entre 7 et 8	Entre 7 et 8	Entre 7 et 8	Non	Je n'ai pas la possibilité matérielle de la faire		Oui		30	Non	Je n'ai pas la possibilité matérielle de la faire		Oui		30	Non	Je n'ai pas la possibilité matérielle de la faire		Oui		30	Non			Non
2013-10-03 08:21:39	1	183	71	40-49	Le jour (entre 7H et 20H)	Avant 7H, Entre 12H et 14H, En début de soirée (18H-20H)	3 à 6 h	6 à 9 h	1	Grand raid reunion 46h 2006 Utmb 45h 2013	< 1	22h	Non	2	Non	Non	Non			0	3	0	0	0	Entre 6 et 7	Entre 7 et 8	Entre 7 et 8	Oui		20 minutes	Oui		20	Oui		20	Oui		20	Oui		20	Oui		20	Oui	Oui	Micro sommeils en général au ravito suivant les barrières horaires. Entre 8 et 20 minutes. Exemple UTMB 2013, 35 minutes en 45h. Mais toujours au delà de la 24eme heures de course.	Oui
2013-10-03 08:24:38	1	177	72	40-49	Le jour (entre 7H et 20H)	Le matin (7H-12H), L'après-midi (14H-18H), En début de soirée (18H-20H)	3 à 6 h	9 à 12 h	2	158ème TDS 2011 45ème GRP 160 2012 6ème PTL 2013	Entre 2 et 3h	22h	Oui	5 ans	Non	Non	Non			0	4	0	0	moins de 1	Entre 7 et 8	Entre 7 et 8	Entre 7 et 8	Non	Je n'en ressens pas le besoin		Non			Non	Je n'en ressens pas le besoin		Non	Je n'en ressens pas le besoin		Non	Je n'en ressens pas le besoin		Oui		15min	Oui	Non		Non
2013-10-03 08:26:09	1	183	67	18- 29	Le jour (entre 7H et 20H)	Le matin (7H-12H), L'après-midi (14H-18H), En début de soirée (18H-20H)	6 à 9 h	12 à 15 h	2	MAXI RACE 2012 - 92 km - 5400+ en 15h57' ENDURANCE TRAIL 2012 - 100km - 4500+ en 16h19' GRP 2013 - 160 km - 10500+ en 41h20'	Entre 1 et 2h	22h	Oui	1	Non	Oui	Non		respiration abdominale	0	2	2	0	0	Entre 7 et 8	Entre 8 et 9	Entre 8 et 9	Oui		20	Oui		20	Oui		20	Non	Je n'en ressens pas le besoin		Oui		30	Oui		30	Oui	Non		Non
2013-10-03 08:40:05	1	180	79	30-39	Posté	Cela varie chaque jour	9 à 12 h	12 à 15 h	2	Trail des remparts lillois 82eme sur 400 participants Participation a l ICE trail la TARENTAISE 2013 arrêté a l avant dernière BH pour retard (15minutes)	Entre 2 et 3h	23h	Non	Il y a 5 a 7 ans environ	Non	Non	Non		Allonge yeux fermés et se concentre sur le calme	0	4 a 6	0	0	0	Entre 5 et 6	Entre 7 et 8	Entre 7 et 8	Oui		30 minutes a 1 heure	Non	Je n'en ressens pas le besoin		Oui		30' a 1 h	Non	Je n'en ressens pas le besoin		Oui		30' a 1h	Non	Je n'en ressens pas le besoin		Non	Non		Non
2013-10-03 08:41:52	1	193	82	18- 29	Le jour (entre 7H et 20H)	L'après-midi (14H-18H), En début de soirée (18H-20H), Le soir (après 20H)	3 à 6 h	6 à 9 h	1	Finisher Grand Duc de Chartreuse 2011 Finisher SaintéLyon 2008 et 2012	Entre 2 et 3h	23h	Non	4	Oui	Non	Non		Pensées positives et d'extérieurs (sensation de glisse dans l'eau...)	0	2	0	0	1	Entre 8 et 9	Entre 9 et 10	Entre 9 et 10	Non	Je n'ai pas la possibilité matérielle de la faire		Oui		20 minutes	Non			Oui		20 minutes	Non	Je n'ai pas la possibilité matérielle de la faire		Oui		20 minutes	Oui	Non		Non
2013-10-03 08:43:42	1	184	74	18- 29	Le jour (entre 7H et 20H)	L'après-midi (14H-18H), En début de soirée (18H-20H), Le soir (après 20H)	3 à 6 h	6 à 9 h	0	1222eme marathon du mont blanc en 2012.	Entre 1 et 2h	22h	Non	1	Non	Non	Non			0	6	0	0	0	Entre 7 et 8	Entre 9 et 10	Entre 9 et 10	Non	Je n'en ressens pas le besoin		Non	Je n'en ressens pas le besoin		Non	Je n'en ressens pas le besoin		Oui		30 min	Oui		30min	Oui		30min	Non			Non
2013-10-03 08:49:12	1	180	80	40-49	Le jour (entre 7H et 20H)	Le matin (7H-12H), L'après-midi (14H-18H), Cela varie chaque jour	3 à 6 h	3 à 6 h	3	UTV. Vercors 22 éme en 2011 UT4M Grenoble 89 eme en 2013	Entre 1 et 2h	23h	Non	5	Non	Non	Non		Je ferme les yeux et me rapproche de mon épouse.	0	0	10	0	0	Entre 7 et 8	Entre 7 et 8	Entre 7 et 8	Oui		10 minutes	Oui		10 minutes	Oui		10 minutes	Oui		10 minutes	Oui		10 minutes	Oui		10 minutes	Oui	Oui	j'ai dormi 2 fois 20 minutes pour un total de 40 h00 de course	Non
2013-10-03 08:52:06	1	170	66	40-49	Le jour (entre 7H et 20H)	Avant 7H, Le matin (7H-12H), L'après-midi (14H-18H)	3 à 6 h	6 à 9 h	3	ecotrail paris 7h58 2013 grand raid Morbihan 2011 33h35	< 1	22h	Non	2	Non	Non	Non		la lecture	0	4	0	0	0	Entre 6 et 7	Entre 7 et 8	Entre 8 et 9	Oui		40mn	Oui		1h 15	Oui		40	Oui		1h15	Oui		40	Oui		1h15	Oui	Non		Non
2013-10-03 08:55:20	1	176	67	30-39	Posté	Cela varie chaque jour	3 à 6 h	3 à 6 h	1	ccc 2013 : 22h55	> 3h	23h	Non	1	Non	Non	Non			0	0	0	0/10	0	Entre 6 et 7	Entre 7 et 8	Entre 7 et 8	Oui		1	Non	Je n'en ressens pas le besoin		Oui			Non	Je n'en ressens pas le besoin		Oui			Non	Je n'en ressens pas le besoin		Oui	Non		Non
2013-10-03 08:58:48	1	175	76	40-49	Le jour (entre 7H et 20H)	En début de soirée (18H-20H)	6 à 9 h	9 à 12 h	2	UTMB Utpma	Entre 2 et 3h	22h	Oui	4	Oui	Oui	Oui	Surmontil		0	4	0	0	0	Entre 6 et 7	Entre 7 et 8	Entre 7 et 8	Non	Je n'en ressens pas le besoin		Non	Je n'en ressens pas le besoin		Non	Je n'en ressens pas le besoin		Non	Je n'en ressens pas le besoin		Non	Je n'en ressens pas le besoin		Non	Je n'en ressens pas le besoin		Oui	Oui	UTMB temps de course 44h temps de sommeil 2fois15minute	Oui
2013-10-03 08:59:01	1	177	71	30-39	La nuit	Le matin (7H-12H), Entre 12H et 14H, En début de soirée (18H-20H)	6 à 9 h	9 à 12 h	1	2014 sera ma 1ère saison d'ultra-trail après avoir participé à des trails longues distances	Entre 1 et 2h	22h	Oui	1	Non	Non	Non			0	3	1	1	0	Entre 6 et 7	Entre 7 et 8	Entre 7 et 8	Oui		1	Non	Je n'en ressens pas le besoin		Oui		30min à 1heure	Oui		30min à 1heure	Oui		30min à 1heure	Oui		1heure	Non			Non
2013-10-03 08:59:17	1	180	70	30-39	Le jour (entre 7H et 20H)	Entre 12H et 14H, En début de soirée (18H-20H)	6 à 9 h	9 à 12 h	1	80 km en 11H - 2012	Entre 2 et 3h	23h	Non	4	Non	Oui	Non		Je me force à faire le vide dans ma tête. Cela consiste à se dire une routine "ne penses à rien, ne penses à rien..."	1	1	2	0	2	Entre 7 et 8	Entre 9 et 10	Entre 8 et 9	Non	Je n'ai pas le temps		Non	Je n'ai pas le temps		Non	Je n'ai pas le temps		Non	Je n'ai pas le temps		Non	Je n'ai pas le temps		Oui		30 min	Non			Non
2013-10-03 09:01:49	1	186	82	30-39	Le jour (entre 7H et 20H)	Le matin (7H-12H), En début de soirée (18H-20H)	3 à 6 h	6 à 9 h	1	514 CCC 2011 520 CCC 2012 612 TDS 2013	Entre 1 et 2h	21h	Non	10	Non	Non	Non			0	4	0	0	0	Entre 5 et 6	Entre 6 et 7	Entre 8 et 9	Non	Je n'ai pas la possibilité matérielle de la faire		Oui		45'	Non	Je n'ai pas la possibilité matérielle de la faire		Oui		45'	Non	Je n'ai pas la possibilité matérielle de la faire		Oui		1heure	Oui	Non		Non
2013-10-03 09:03:55	1	182	77	40-49	Le jour (entre 7H et 20H)	Le matin (7H-12H), L'après-midi (14H-18H)	3 à 6 h	9 à 12 h	3	16 heures à la trans aubrac 105km 21h l'utpma 105 38h53 le grp 160km ..2013	Entre 1 et 2h	22h	Non	10	Non	Non	Non			0	3	0	0	1	Entre 6 et 7	Entre 9 et 10	Entre 8 et 9	Oui		30min	Oui		20min	Oui		30	Oui		30min	Oui		30min à 45min	Oui		30min	Oui	Oui	38h53 de course 5min de sommeil sur un banc durant la nuit. Sommeil profond	Non
2013-10-03 09:34:15	1	183	86	30-39	Le jour (entre 7H et 20H)	Entre 12H et 14H	3 à 6 h	9 à 12 h	1	22 h CCC en 2008, 36 h GRP en 2011	Entre 1 et 2h	22h	Non	15	Non	Non	Non			0	4	0	0	0	Entre 7 et 8	Entre 8 et 9	Entre 8 et 9	Non	Je n'en ressens pas le besoin		Non	Je n'en ressens pas le besoin		Non	Je n'en ressens pas le besoin		Non	Je n'en ressens pas le besoin		Non	Je n'en ressens pas le besoin		Non	Je n'en ressens pas le besoin		Oui	Non		Non
2013-10-03 09:42:41	1	176	76	40-49	Le jour (entre 7H et 20H)	En début de soirée (18H-20H)	3 à 6 h	6 à 9 h	2	Grand trail du nord 150 KM 22H37 13éme en 2011	Entre 1 et 2h	22h	Oui	4	Non	Oui	Non		tisanes	0	3	2	0	2	Entre 6 et 7	Entre 7 et 8	Entre 8 et 9	Non	Je n'ai pas le temps		Oui		1HEURE	Non	Je n'ai pas le temps		Oui		1 HEURE	Non	Je n'ai pas le temps		Oui		1 HEURE	Oui	Non		Non
2013-10-03 10:06:17	2	158	47	30-39	Le jour (entre 7H et 20H)	Entre 12H et 14H	9 à 12 h	Plus de 15 h	1	UTAT : Ultra Trail Atlas Toubkal / octobre 2012: 105km - 6500m D+/- en 21h30 - 5ième féminine Ultra Trail Anbdorre / Juin 2013 : 112km - 10000m D+/- en 29h30 - 64ième au scratch	Entre 1 et 2h	22h	Non	6	Non	Oui	Non		Lecture, iPhone, ordi portable...	0	5	0	0	0	Entre 6 et 7	Entre 7 et 8	Entre 8 et 9	Non	Je n'ai pas le temps		Non	Je n'ai pas le temps		Non	Je n'ai pas le temps		Non	Je n'ai pas le temps		Non	Je n'ai pas le temps		Oui		30 min	Oui	Non		Oui
2013-10-03 10:12:49	1	171	69	40-49	Le jour (entre 7H et 20H)	Le matin (7H-12H), En début de soirée (18H-20H), Le soir (après 20H)	3 à 6 h	12 à 15 h	1	Trail des poilus 2013	Entre 2 et 3h	22h	Oui	10	Non	Non	Non			0	0	0	2	0	Entre 6 et 7	Entre 7 et 8	Entre 7 et 8	Non	Je n'ai pas le temps		Non	Je n'en ressens pas le besoin		Non	Je n'en ressens pas le besoin		Non	Je n'en ressens pas le besoin		Non	Je n'en ressens pas le besoin		Non	Je n'en ressens pas le besoin		Oui	Non		Non
2013-10-03 10:16:08	1	185	78	40-49	Le jour (entre 7H et 20H)	En début de soirée (18H-20H)	6 à 9 h	9 à 12 h	1	Ultra à venir 103 kms Milliau (Templiers)	Entre 1 et 2h	23h	Oui	6	Non	Non	Non			0	5	0	0	0	Entre 6 et 7	Entre 9 et 10	Entre 8 et 9	Non	Je n'ai pas la possibilité matérielle de la faire		Oui		20 min	Non	Je n'ai pas la possibilité matérielle de la faire		Oui		30 min	Non	Je n'ai pas la possibilité matérielle de la faire		Oui		30	Non			Non
2013-10-03 10:37:20	1	175	66	50- 59	Le jour (entre 7H et 20H)	Entre 12H et 14H	9 à 12 h	12 à 15 h	2	6000d 52eme saintélyon 42eme	> 3h	21h	Non	5	Non	Oui	Non			0	4	0	8	0	Entre 7 et 8	Entre 7 et 8	Entre 7 et 8	Non	Je n'ai pas le temps		Non	Je n'ai pas le temps		Non	Je n'ai pas le temps		Non	Je n'ai pas le temps		Non	Je n'ai pas le temps		Non	Je n'ai pas le temps		Non			Non
2013-10-03 10:46:28	1	182	74	18- 29	Le jour (entre 7H et 20H)	Le matin (7H-12H), En début de soirée (18H-20H)	6 à 9 h	9 à 12 h	1	80km 19h grp 2013	Entre 1 et 2h	22h	Oui	2	Non	Non	Non			0	2	1	0	0	Entre 7 et 8	Entre 8 et 9	Entre 8 et 9	Non	Je n'ai pas la possibilité matérielle de la faire		Oui		1h	Non	Je n'ai pas la possibilité matérielle de la faire		Oui		1h	Non	Je n'ai pas la possibilité matérielle de la faire		Oui		1h	Non	Non		Non
2013-10-03 11:45:22	1	192	82	40-49	Le jour (entre 7H et 20H)	En début de soirée (18H-20H)	3 à 6 h	9 à 12 h	2	2013 49ème au GRP 2012 58ème en 2012 au TOR des Geants 4 fois l'UTMB et tout le temps entre la place 200 et 250	Entre 1 et 2h	23h	Non	4	Non	Non	Non		Je lis 15mn maximum, j’éteins la lumière et en 2mn je dors!	0	0	0	0	0.5	Entre 6 et 7	Entre 8 et 9	Entre 8 et 9	Non	Je n'ai pas le temps		Oui		30mn	Non	Je n'ai pas le temps		Oui		30	Non	Je n'ai pas le temps		Oui		1h	Oui	Oui	Sur un Ultra tres long UTMB, GRP Grand Raid de la Reunion je dors un à deux fois 20. La où je me pose je m'endors soit en bordure de chemin soit dans une base vie	Oui
2013-10-03 08:15:35	1	169	62	> 60	Sans emploi	Cela varie chaque jour	9 à 12 h	12 à 15 h	2	UTMB 2009 en V3 TDG 2012 en V3	Entre 1 et 2h	22h	Non	8	Non	Non	Non			0	2	0	0	0	Entre 8 et 9	Entre 8 et 9	Entre 8 et 9	Non	Je n'en ressens pas le besoin		Non	Je n'en ressens pas le besoin		Non	Je n'en ressens pas le besoin		Non	Je n'en ressens pas le besoin		Non	retraité		Oui		20 minutes	Oui	Non		Oui
2013-10-03 11:46:13	1	180	70	40-49	Le jour (entre 7H et 20H)	Cela varie chaque jour	Moins de 3 h	3 à 6 h	2	Ecotrail de Paris 80 Kms en 9h TDS abandon au 70k	> 3h	23h	Non	5	Oui	Oui	Oui	Larochelle		0	4	0	0	0	Entre 7 et 8	Entre 8 et 9	Entre 8 et 9	Non	Je n'ai pas le temps		Non	Je n'ai pas le temps		Non	Je n'ai pas le temps		Oui		30	Non	Je n'ai pas le temps		Oui			Oui	Non		Non
2013-10-03 11:53:42	1	179	73	40-49	Le jour (entre 7H et 20H)	Le matin (7H-12H), L'après-midi (14H-18H)	9 à 12 h	12 à 15 h	2	Grand raid Pyrenees (160) 2011 59ème 31h00 Echappee belle 2013 77ème 42h00	> 3h	Minuit	Non	5	Oui	Oui	Non			0	0	0	3	0	Entre 6 et 7	Entre 6 et 7	Entre 7 et 8	Non	Je n'ai pas le temps		Non	Je n'ai pas le temps		Non	Je n'ai pas le temps		Non	Je n'ai pas le temps		Non	Je n'ai pas le temps		Non	Je n'ai pas le temps		Oui	Non		Non
2013-10-03 11:55:10	1	184	71	50- 59	Posté	Cela varie chaque jour	9 à 12 h	12 à 15 h	3	2009 gta	Entre 1 et 2h	21h	Non	10	Non	Non	Non			0	2	1	0	0	Entre 7 et 8	Entre 8 et 9	Entre 8 et 9	Non	Je n'ai pas le temps		Non	Je n'en ressens pas le besoin		Non	Je n'en ressens pas le besoin		Non	Je n'en ressens pas le besoin		Oui		20mn	Non	Je n'en ressens pas le besoin		Oui	Non		Oui
2013-10-03 12:10:42	1	185	77	30-39	Le jour (entre 7H et 20H)	Le matin (7H-12H), Entre 12H et 14H, Le soir (après 20H)	Moins de 3 h	3 à 6 h	1	385e pour mon 1er ultra et ma 1ere CCC en 2013. (objectif dans les 1000)	Entre 1 et 2h	23h	Oui	2010	Non	Non	Non		un peu de lecture, c'est très efficace...	4	3	3	1	1	Entre 6 et 7	Entre 9 et 10	Entre 9 et 10	Non	Je n'ai pas le temps		Oui		45 min	Non	Je n'ai pas le temps		Oui		45 min	Non	Je n'ai pas le temps		Oui		2 hr	Oui	Non		Non
2013-10-03 12:18:13	1	185	70	30-39	Le jour (entre 7H et 20H)	Avant 7H, Le matin (7H-12H), En début de soirée (18H-20H)	6 à 9 h	9 à 12 h	3	5ème 6666 GTMC	Entre 2 et 3h	22h	Oui	7	Non	Oui	Non		Grande facilité d'endormissement mais plusieurs réveils nocturnes	0	1	1	0	0	Entre 7 et 8	Entre 7 et 8	Entre 7 et 8	Non	Je n'ai pas la possibilité matérielle de la faire		Oui		30' à 2h	Non	Je n'ai pas la possibilité matérielle de la faire		Oui		30' à 2h	Non	Je n'ai pas la possibilité matérielle de la faire		Oui		30' à 2h	Oui	Non		Non
2013-10-03 12:30:24	1	176	73	40-49	Le jour (entre 7H et 20H)	Le matin (7H-12H), L'après-midi (14H-18H)	9 à 12 h	12 à 15 h	3	160 km en 34h30 100 km en 19h00	< 1	22h	Non	6	Non	Oui	Non			0	2	0	0	0	Entre 8 et 9	Entre 8 et 9	Entre 8 et 9	Non	Je n'en ressens pas le besoin		Non	Je n'en ressens pas le besoin		Non	Je n'en ressens pas le besoin		Non	Je n'en ressens pas le besoin		Non	Je n'ai pas le temps		Non	Je n'ai pas le temps		Oui	Non	pour le grp en 34 H JE N'est pas dormi	Oui
2013-10-03 12:57:31	1	184	75.9	40-49	Le jour (entre 7H et 20H)	Le matin (7H-12H), Entre 12H et 14H, L'après-midi (14H-18H)	3 à 6 h	6 à 9 h	1	2013 - 6666 occitane 120 km - 24h15	Entre 1 et 2h	22h	Non	8	Non	Non	Non			0	3	1	0	0	Entre 6 et 7	Entre 7 et 8	Entre 7 et 8	Non	Je n'en ressens pas le besoin		Non	Je n'en ressens pas le besoin		Non	Je n'en ressens pas le besoin		Non	Je n'en ressens pas le besoin		Non	Je n'ai pas le temps		Oui		1	Oui	Non		Oui
2013-10-03 13:07:20	1	179	73	18- 29	Le jour (entre 7H et 20H)	Le matin (7H-12H), L'après-midi (14H-18H)	9 à 12 h	12 à 15 h	2	2013 PIC SAINT LOUP ULTRA DRAILLE 40ème	Entre 1 et 2h	22h	Non	1	Non	Non	Non			0	2	0	0	0	Entre 7 et 8	Entre 8 et 9	Entre 8 et 9	Non	Je n'ai pas le temps		Non	Je n'en ressens pas le besoin		Non	Je n'ai pas le temps		Oui		30 minutes	Non	Je n'ai pas le temps		Oui		30 minutes	Oui	Non		Non
2013-10-03 13:10:07	1	172	70	40-49	Le jour (entre 7H et 20H)	L'après-midi (14H-18H), En début de soirée (18H-20H), Cela varie chaque jour	3 à 6 h	9 à 12 h	1		Entre 1 et 2h	22h	Non	1	Non	Oui	Non			0	2	0	0	0	Entre 8 et 9	Entre 8 et 9	Entre 8 et 9	Oui		1H	Oui		1H	Oui		1H	Oui		1H	Oui		1H	Oui		1H	Non			Non
2013-10-03 13:12:52	1	183	72	30-39	Le jour (entre 7H et 20H)	Le matin (7H-12H), Entre 12H et 14H, L'après-midi (14H-18H)	6 à 9 h	9 à 12 h	2	12 eme au bretagne ultra trail 2013	Entre 1 et 2h	22h	Oui	3	Non	Non	Non			0	2	0	0	1	Entre 7 et 8	Entre 8 et 9	Entre 8 et 9	Non	Je n'ai pas la possibilité matérielle de la faire		Oui		15min	Non	Je n'ai pas la possibilité matérielle de la faire		Oui		15min	Non	Je n'ai pas la possibilité matérielle de la faire		Oui		15min	Oui	Non		Non
2013-10-03 13:18:06	1	183	75	40-49	Le jour (entre 7H et 20H)	Entre 12H et 14H	6 à 9 h	9 à 12 h	2	2013 100km Race to the Stones 15h 2013 50 miles 12h	Entre 2 et 3h	23h	Non	2	Non	Non	Non			25	8	0	0	3	Entre 7 et 8	Entre 8 et 9	Entre 8 et 9	Non	Je n'en ressens pas le besoin		Non	Je n'en ressens pas le besoin		Non	Je n'en ressens pas le besoin		Non	Je n'en ressens pas le besoin		Non	Je n'ai pas le temps		Non	Je n'ai pas le temps		Non			Non
2013-10-03 13:21:50	1	172	64	18- 29	Posté	Cela varie chaque jour	6 à 9 h	12 à 15 h	2	48 ème UTCO 2013	Entre 1 et 2h	22h	Non	7	Non	Non	Non			10	5	0	0	0	Entre 6 et 7	< 5	Entre 7 et 8	Non	Je n'en ressens pas le besoin		Non	Je n'en ressens pas le besoin		Non	Je n'en ressens pas le besoin		Non	Je n'en ressens pas le besoin		Oui		30min	Oui		1h	Oui	Non		Non
2013-10-03 13:21:59	1	171	61	40-49	Le jour (entre 7H et 20H)	Le matin (7H-12H), L'après-midi (14H-18H)	9 à 12 h	Plus de 15 h	3	8ième TDS 2011, 6ième TGV 5ième TDS 2012, 6ième à la TDS 2013, 4ième grand duc	< 1	21h	Non	10	Non	Non	Non			0	0	1	0	1	Entre 9 et 10	Entre 9 et 10	Entre 9 et 10	Non	Je n'en ressens pas le besoin		Non	Je n'en ressens pas le besoin		Non	Je n'en ressens pas le besoin		Non	Je n'en ressens pas le besoin		Oui		20'	Oui		20'	Non			Non
2013-10-03 13:32:30	1	186	76	30-39	Posté	Cela varie chaque jour	3 à 6 h	6 à 9 h	1	2013 Raid du Morbihan - 86km - 9h21 - 26e/742 2012 Grand Raid du Morbihan - 177km - 32h03 - 182e/339 2011 Eco Trail Paris - 80km - 9h01 - 156e/1479	Entre 1 et 2h	22h	Non	8	Non	Oui	Non			0	0	8	0	1	Entre 5 et 6	Entre 7 et 8	Entre 7 et 8	Oui		45min	Oui		15min	Oui		45min	Non	Je n'en ressens pas le besoin		Oui		60min	Non	Je n'en ressens pas le besoin		Oui	Non	Sur 1 nuit de course aucun besoin de dormir de ressenti.	Oui
2013-10-03 13:51:28	1	179	73	18- 29	Le jour (entre 7H et 20H)	Cela varie chaque jour	3 à 6 h	9 à 12 h	2	2013 Tour du lac annecy 21H	Entre 1 et 2h	22h	Non	1	Non	Non	Non			1	2	0	0	1	Entre 6 et 7	Entre 7 et 8	Entre 7 et 8	Oui		30 minutes	Non	Je n'en ressens pas le besoin		Oui		30 minutes	Non	Je n'en ressens pas le besoin		Oui		30 minutes	Non	Je n'en ressens pas le besoin		Oui	Oui	sur un lit de camp au ravito: 20 minutes pour 22H de course	Non
2013-10-03 13:53:37	2	165	57	30-39	Le jour (entre 7H et 20H)	Le matin (7H-12H), En début de soirée (18H-20H)	6 à 9 h	9 à 12 h	1	7ème femme au trail de Bourbon 2010 2ème à la 6666 2012	< 1	21h	Non	4	Non	Oui	Non			0	2	1	1	1	Entre 7 et 8	Entre 7 et 8	Entre 8 et 9	Oui		15 min	Oui		20 min	Oui		10 min	Oui		20 min	Oui		15 min	Oui		20 min	Oui	Non		Non
2013-10-03 14:01:03	1	172	67	40-49	Le jour (entre 7H et 20H)	Avant 7H, L'après-midi (14H-18H), Le soir (après 20H)	9 à 12 h	Plus de 15 h	4	37h grand raid des Pyrénées 2011 30 transmartinique 2008 37 grand raid de la reunion 2007	Entre 1 et 2h	22h	Oui	2	Non	Non	Non			0	5	0	0	0	Entre 5 et 6	Entre 5 et 6	Entre 6 et 7	Oui		1h	Non	Je n'en ressens pas le besoin		Non			Non			Non			Non			Oui	Non		Oui
2013-10-03 14:14:09	1	168	72	30-39	Posté	Le matin (7H-12H), Cela varie chaque jour	3 à 6 h	6 à 9 h	1	saintelyon : 8h12 ccc (utmb) : 25h09 le puy-firminy : 9h20 grand trail du saint jacques : 10h10	Entre 1 et 2h	22h	Oui	15	Non	Non	Non		pas de méthodes particulières. Je m'endors très facilement et très rapidement	0	0	0	0	0	Entre 6 et 7	Entre 7 et 8	Entre 7 et 8	Oui		20 min	Oui		20 min	Oui		30 min	Oui		20 min	Oui		30 min	Oui		20 min	Oui	Non		Non
2013-10-03 14:16:33	1	181	74	30-39	Le jour (entre 7H et 20H)	Avant 7H, Le soir (après 20H)	9 à 12 h	12 à 15 h	3	maxi race annecy 2012 -90 km 5400m D+ 13h 17 min eco trail paris 2013-80 km 7h45min andorra mitic ultra trail 2011-112km 9700mD+ 31h 21min	Entre 1 et 2h	22h	Oui	10	Non	Non	Non		la musique( banco de gaia,david lynch,pink floyd,chopin,) la respiration	0	2	2	0	0	Entre 6 et 7	Entre 6 et 7	Entre 6 et 7	Non	Je n'en ressens pas le besoin		Non	Je n'en ressens pas le besoin		Non	Je n'en ressens pas le besoin		Non	Je n'en ressens pas le besoin		Non	Je n'en ressens pas le besoin		Non	Je n'en ressens pas le besoin		Oui	Non		Oui
2013-10-03 14:19:09	1	184	63	30-39	Le jour (entre 7H et 20H)	Avant 7H, Le matin (7H-12H), Entre 12H et 14H	3 à 6 h	6 à 9 h	2	102eme UTMB 2010 9e sur La Montagn'hard 60 2013 36e (11:33:59) sur Maxi Race Lac D'annecy 2011 127e (15:04:09) sur UTMB (The North Face Ultra-Trail Du Mont-Blanc) 2010 (89km) 207e (32:37:04) sur UTMB (The North Face Ultra-Trail Du Mont-Blanc) 2013 (168km)	Entre 1 et 2h	Minuit	Non	10	Non	Non	Non			0	6	0	1	0	Entre 6 et 7	Entre 7 et 8	Entre 7 et 8	Non	Je n'ai pas le temps		Oui		15 minutes	Non	Je n'ai pas le temps		Oui		15	Non	Je n'ai pas le temps		Oui		15	Oui	Non		Oui
2013-10-03 14:20:34	1	178	73	30-39	Le jour (entre 7H et 20H)	Le matin (7H-12H), En début de soirée (18H-20H)	6 à 9 h	12 à 15 h	2	15h30 maxi race 92km 40h30 UTMB 170km 16h30 CCC 100km 13h00 U3T 80km	Entre 1 et 2h	22h	Non	4	Non	Non	Non			0	3	1	0	0	Entre 6 et 7	Entre 7 et 8	Entre 7 et 8	Non	Je n'ai pas le temps		Non	Je n'ai pas la possibilité matérielle de la faire		Non	Je n'ai pas la possibilité matérielle de la faire		Non	Je n'ai pas le temps		Non	Je n'ai pas le temps		Non	Je n'ai pas le temps		Oui	Non		Oui
2013-10-03 14:23:10	1	174	72	30-39	Le jour (entre 7H et 20H)	Avant 7H, Entre 12H et 14H, En début de soirée (18H-20H)	9 à 12 h	Plus de 15 h	1	1er UTCO 2013 64eme CCC 2012	Entre 1 et 2h	23h	Non	6	Non	Non	Non			0	5	1	0	0	Entre 7 et 8	Entre 7 et 8	Entre 8 et 9	Non	Je n'ai pas le temps		Non	Je n'ai pas le temps		Non	Je n'ai pas le temps		Non	Je n'ai pas le temps		Non	Je n'ai pas le temps		Non	Je n'ai pas le temps		Non			Non
2013-10-03 14:41:28	1	180	76	40-49	Le jour (entre 7H et 20H)	Entre 12H et 14H, En début de soirée (18H-20H), Le soir (après 20H)	6 à 9 h	12 à 15 h	1	2013	< 1	22h	Non	10	Non	Oui	Non			0	0	0	0	1	Entre 6 et 7	Entre 7 et 8	Entre 8 et 9	Oui		30	Non	Je n'en ressens pas le besoin		Oui		30	Non	Je n'en ressens pas le besoin		Oui		30	Non	Je n'en ressens pas le besoin		Oui	Non		Non
2013-10-03 14:52:12	1	180	80	40-49	Le jour (entre 7H et 20H)	Cela varie chaque jour	6 à 9 h	9 à 12 h	2	UTMB 2005: 34h Grand Raid du Mercantour 2009: 17h Marathon des Sables 2010: 55éme au scratch Endurance Trail 2012: 17h30 Marathon des Sables 2013: 154ème au scratch	Entre 2 et 3h	23h	Non	2	Non	Non	Non			0	4	0	1	0	Entre 6 et 7	Entre 8 et 9	Entre 8 et 9	Non	Je n'ai pas la possibilité matérielle de la faire		Non	je fais la sieste (1h) si j'en ressens le besoin (rare)		Non	Je n'ai pas la possibilité matérielle de la faire		Non	je fais la sieste (1h) si j'en ressens le besoin (rare)		Non	Je n'ai pas la possibilité matérielle de la faire		Non	je fais la sieste (1h) si j'en ressens le besoin (rare)		Oui	Non		Oui
2013-10-03 15:04:03	1	177	67	18- 29	Le jour (entre 7H et 20H)	Avant 7H, Entre 12H et 14H, En début de soirée (18H-20H), Cela varie chaque jour	9 à 12 h	Plus de 15 h	2	Saison 2013: 21eme TransVulcania 83km - 8h24 (Espagne) 7eme à L'Ice Trail Tarentaise - 8h55 (France) 8eme à UROC 100k - 11h32 (USA) 4ème de la coupe du monde de Skyrunning "Ultra"	< 1	22h	Non	5	Non	Non	Non			0	0	2	0	0	Entre 7 et 8	Entre 8 et 9	> 10	Non	Je n'en ressens pas le besoin		Non	Je n'en ressens pas le besoin		Non	Je n'ai pas le temps		Oui		20 minutes	Non	Je n'ai pas le temps		Oui		1h à 2h	Oui	Non		Non
2013-10-03 15:04:35	1	181	74	30-39	Le jour (entre 7H et 20H)	Le soir (après 20H)	3 à 6 h	6 à 9 h	3	Eco trail de Paris 9h15 (2013) TDS 29h15 (2013)	< 1	Minuit	Non	10	Non	Non	Non			0	5	0	2	0	Entre 6 et 7	Entre 9 et 10	Entre 9 et 10	Non	Je n'ai pas la possibilité matérielle de la faire		Oui		20 min	Non	Je n'ai pas la possibilité matérielle de la faire		Oui		20 min	Non	Je n'ai pas la possibilité matérielle de la faire		Oui		20 min	Oui	Oui	5 min de sommeil à un ravito dans un lit	Non
2013-10-03 15:07:42	1	176	89	40-49	Le jour (entre 7H et 20H)	Avant 7H, Le soir (après 20H)	3 à 6 h	6 à 9 h	0	Pa d ultras	Entre 1 et 2h	23h	Non	3	Non	Non	Non			0	4	2	0	1	Entre 5 et 6	Entre 5 et 6	Entre 5 et 6	Oui		30 mn	Oui		20mn	Oui		20mn	Oui		20mn	Oui		20mn	Oui		20mn	Non			Non
2013-10-03 15:22:10	1	179	75	18- 29	Le jour (entre 7H et 20H)	Cela varie chaque jour	3 à 6 h	12 à 15 h	1	La ccc 2013 568eme	Entre 1 et 2h	23h	Non	3	Non	Non	Non			0	4	0	0	0	Entre 7 et 8	Entre 9 et 10	Entre 9 et 10	Non	Je n'ai pas le temps		Non	Je n'en ressens pas le besoin		Non	Je n'ai pas le temps		Non	Je n'en ressens pas le besoin		Non	Je n'ai pas le temps		Non			Oui	Non		Non
2013-10-03 15:36:56	1	176	70	> 60	Sans emploi	Le matin (7H-12H), L'après-midi (14H-18H)	6 à 9 h	6 à 9 h	0	pas fait d'ultra	Entre 2 et 3h	23h	Non	2 ans	Non	Non	Non			jamais fumé	1	0	0	0	Entre 7 et 8	Entre 7 et 8	Entre 7 et 8	Non			Non			Non			Non			Non			Non			Non			Non
2013-10-03 23:23:50	1	163	62	40-49	Le jour (entre 7H et 20H)	Le matin (7H-12H), En début de soirée (18H-20H), Le soir (après 20H)	3 à 6 h	6 à 9 h	2	2012 trail ardechois et ccc chamonix 2013 utmb	Entre 1 et 2h	jamais après 20h	Non	4	Non	Non	Non			0	2	0	0	0	Entre 6 et 7	Entre 6 et 7	Entre 7 et 8	Non	Je n'en ressens pas le besoin		Non	Je n'ai pas le temps		Non	Je n'en ressens pas le besoin		Non	Je n'en ressens pas le besoin		Non	Je n'en ressens pas le besoin		Non			Oui	Non		Oui
2013-10-03 23:40:24	1	176	84	50- 59	Le jour (entre 7H et 20H)	Avant 7H, Le soir (après 20H)	3 à 6 h	6 à 9 h	4	2011 Trans 333 (350km non stop - désert) 5ème 86h30 2006 Mauritanienne Race (200km non stop - desert) 9ème 48h30 2013 Grand Raid Morbihan (180km) 258/760 33h52	Entre 1 et 2h	22h	Oui	1	Non	Non	Non			0	3	0	1	1	Entre 6 et 7	Entre 6 et 7	Entre 6 et 7	Non	Je n'ai pas la possibilité matérielle de la faire		Oui		15mn	Non	Je n'ai pas la possibilité matérielle de la faire		Oui		15mn	Non	Je n'ai pas la possibilité matérielle de la faire		Oui		15mn	Oui	Oui	- Non sur les courses inférieures à 36h (Morbihan 33h50 sans dormir, Mercantour, CCC, 24h,...) - Tentative infructueuse de sommeil sur la Mauritanienne race. Au final 48h sans dormir (+12h sans sommeil à l'arrivée -Sur la trans 333, 3 x 1h30 de sommeil en fin de nuit (vers 4h00 du matin) + 2 x 15mn de sommeil flash sur la piste quand nécessaire, soit moins de 6h de sommeil en 4 jours	Oui
2013-10-04 01:00:34	1	170	66	40-49	Le jour (entre 7H et 20H)	Avant 7H, Le matin (7H-12H), Entre 12H et 14H	6 à 9 h	9 à 12 h	1	je moque du classement et ne le regarde jamais.	Entre 1 et 2h	jamais après 20h	Non	5	Non	Non	Non			0	0	2	0	0	Entre 7 et 8	Entre 7 et 8	Entre 7 et 8	Non	Je n'en ressens pas le besoin		Non	Je n'en ressens pas le besoin		Non	Je n'en ressens pas le besoin		Non	Je n'en ressens pas le besoin		Non	Je n'en ressens pas le besoin		Non	Je n'en ressens pas le besoin		Oui	Non		Non
2013-10-04 01:51:58	1	170	60	40-49	Le jour (entre 7H et 20H)	Entre 12H et 14H, En début de soirée (18H-20H)	6 à 9 h	12 à 15 h	3	Trail du Ventoux (14ème - 2ème V1) Trail de Signes (6ème - 3ème V1) Trail des Mélèzes (5ème - 3ème V1) Endurance Trail des Templiers UTMB Diagonal des Fous Tor des Géants Grand Raid du Ventoux Euskal Trail Trail de la Ste Victoire Merell Sky Race Trail de la Sainte Beaume Eco Trail de Paris Trail de l'Ardéchois Trail des Citadelles UT4M Grand Raid du Verdon	Entre 1 et 2h	22h	Oui	10	Oui	Non	Non			0	0	1	0	0	Entre 7 et 8	Entre 8 et 9	Entre 8 et 9	Non	Je n'ai pas la possibilité matérielle de la faire		Oui		1	Non	Je n'ai pas la possibilité matérielle de la faire		Oui		1	Non			Oui		1	Oui	Oui	UT4M (2h)	Oui
2013-10-04 01:59:53	1	174	63	40-49	Le jour (entre 7H et 20H)	Entre 12H et 14H	6 à 9 h	9 à 12 h	2	2013 GRP 98ème (36h18) 2013 UTPMA 116ème (19hh08)	Entre 1 et 2h	22h	Non	10	Non	Oui	Non			0	1	2	0	0	Entre 7 et 8	Entre 7 et 8	Entre 8 et 9	Oui		20min	Oui		20min	Non	Je n'ai pas le temps		Oui		30min	Oui		30min	Oui		30min	Oui	Non		Non
2013-10-04 02:09:54	1	177	71	40-49	Le jour (entre 7H et 20H)	Entre 12H et 14H	6 à 9 h	6 à 9 h	3	Diagonales des fous 2009 UTCO 2012 6000D 2012 UTMB 2012	Entre 1 et 2h	23h	Non	20	Non	Non	Non			0	5	0	0	0	Entre 6 et 7	Entre 6 et 7	Entre 6 et 7	Non	Je n'ai pas le temps		Oui		1h	Non	Je n'ai pas le temps		Oui		1h	Non	Je n'ai pas le temps		Oui		1h	Oui	Non		Oui
2013-10-04 02:47:00	1	183	73	30-39	Le jour (entre 7H et 20H)	Le matin (7H-12H), Entre 12H et 14H	3 à 6 h	6 à 9 h	1	GRP 160 km en 2010 / 71ème / 35h06 Occitane 118 km en 2010 / 13ème / 20h02 Ultra Templiers 116 km en 2009 / 54ème / 16h16 Échappée Belle 150 km en 2013 / 150ème / 52h18 (en mode cool) (24 heures d'Aulnat 190 km en 2012)	Entre 1 et 2h	21h	Non	10	Non	Non	Non			0	3	1	0	0	Entre 8 et 9	Entre 8 et 9	Entre 8 et 9	Non	Je n'en ressens pas le besoin		Non	Je n'en ressens pas le besoin		Non	Je n'ai pas le temps		Oui		1h30	Non	Je n'ai pas le temps		Oui		1h30 à 2h00	Oui	Non		Oui
2013-10-04 03:05:10	2	163	52	50- 59	Le jour (entre 7H et 20H)	Le matin (7H-12H), L'après-midi (14H-18H)	Moins de 3 h	3 à 6 h	1	je frôle toujours les barrières horaires .... mais je suis "finisher" de l'UTMB, 2 fois la Réunion, la PTL et le tor des geants cette année + le mercantour (2 fois)	Entre 1 et 2h	jamais après 20h	Non	5	Oui	Oui	Oui	melatonine	musique fréquences adaptées + respirations	0	0	0	0	0	Entre 7 et 8	Entre 7 et 8	Entre 7 et 8	Non	Je n'en ressens pas le besoin		Non	Je n'en ressens pas le besoin		Non	Je n'en ressens pas le besoin		Non	Je n'en ressens pas le besoin		Non	Je n'en ressens pas le besoin		Non	Je n'en ressens pas le besoin		Oui	Non		Oui
2013-10-04 03:11:01	1	182	81	30-39	Le jour (entre 7H et 20H)	Le matin (7H-12H), Entre 12H et 14H, En début de soirée (18H-20H)	6 à 9 h	12 à 15 h	1	2009 CCC 2011 Défi de l'Oisans non stop 2012 UTMB de repli 2013 Echappée Belle	Entre 2 et 3h	22h	Non	3 ans	Non	Non	Non			0	0	0	0	0	Entre 7 et 8	Entre 7 et 8	Entre 8 et 9	Non	Je n'en ressens pas le besoin		Non	Je n'en ressens pas le besoin		Non	Je n'en ressens pas le besoin		Non	Je n'en ressens pas le besoin		Non	Je n'ai pas le temps		Oui		30' ds le canapé	Oui		Echappée Belle : 1h sur 39h	Oui
2013-10-04 03:19:57	1	178	72	40-49	Le jour (entre 7H et 20H)	Avant 7H, Entre 12H et 14H, Le soir (après 20H)	3 à 6 h	9 à 12 h	1	-	Entre 1 et 2h	22h	Non	10	Non	Non	Non			0	0	0	0	0	Entre 6 et 7	Entre 7 et 8	Entre 7 et 8	Non	Je n'ai pas la possibilité matérielle de la faire		Oui		10mn	Non	Je n'ai pas la possibilité matérielle de la faire		Oui		10mn	Non	Je n'ai pas la possibilité matérielle de la faire		Oui		10mn	Oui	Non		Non
2013-10-04 03:21:32	1	178	65	30-39	Le jour (entre 7H et 20H)	Avant 7H, Le soir (après 20H), Cela varie chaque jour	3 à 6 h	6 à 9 h	2	51e CCC en 2009 (couru en roue libre car c'était le 1er) Sinon plutôt formaté pour le moment pour des distances un plus courtes, (vainqueur Lyon Urban Trail 2009 - 42 km), mais ça va rapidement changer	Entre 1 et 2h	23h	Non	2	Non	Non	Non		Je ferme les yeux... et je m'endors !	0	1	2	0	0,5	Entre 6 et 7	Entre 6 et 7	Entre 7 et 8	Non	Je n'ai pas le temps		Oui		15 mn	Non	Je n'ai pas le temps		Oui		15 mn	Non	Je n'ai pas le temps		Oui		15 mn	Non			Non
2013-10-04 03:33:06	1	175	60	30-39	Le jour (entre 7H et 20H)	Le matin (7H-12H), Entre 12H et 14H, En début de soirée (18H-20H)	6 à 9 h	12 à 15 h	1	Echappée Belle 2013 (143 kms) - 16ème	Entre 1 et 2h	23h	Non	13	Non	Non	Non		Lecture 1/4h	0	0	2	0	0	Entre 7 et 8	Entre 9 et 10	Entre 9 et 10	Non	Je n'en ressens pas le besoin		Non	Je n'en ressens pas le besoin		Non	Je n'en ressens pas le besoin		Non	Je n'en ressens pas le besoin		Non	Je n'en ressens pas le besoin		Non	Je n'en ressens pas le besoin		Oui	Non		Non
2013-10-04 04:06:46	1	185	81	50- 59	Le jour (entre 7H et 20H)	Le matin (7H-12H), Entre 12H et 14H, En début de soirée (18H-20H)	3 à 6 h	6 à 9 h	2	pas de recherche de meilleurs resultats : simplement finir dans les temps et au mieux 2005 : CROMagnon, UTMB(champex),Templiers, SaintéLyon 2006 : Auffargis 50, Dentelles-Ventoux(100), Cro Magnon, UTMB, Saintélyon. 2007 : Auffargis 50, Mercantour (75k), UTMB, Manikou, 2008 : Ecotrail 82km, Auffargis 50, Tour du Canigou, Diago 2009 : Pierrefonds, Trail du Josas 34, Trail des Cerfs (50) Mercantour,…	> 3h	plus tard que minuit	Non	14	Non	Non	Non			0	6	1	0	2	Entre 6 et 7	Entre 7 et 8	Entre 8 et 9	Non	Je n'ai pas la possibilité matérielle de la faire		Non	ca peut m'arriver en fonction de la fatigue	1h	Non	Je n'ai pas le temps		Non	ca peut m'arriver en fonction de la fatigue		Non	Je n'en ressens pas le besoin		Non	Ca peut ma'arriver mais pas automatique		Oui	Non		Oui
2013-10-04 04:07:37	1	171	64	50- 59	Le jour (entre 7H et 20H)	Entre 12H et 14H, En début de soirée (18H-20H)	3 à 6 h	6 à 9 h	1	utmb 2004 : 60ème utmb 2006, 2008, 2009 : 200ème environ	Entre 1 et 2h	21h	Non	3	Non	Non	Non			0	2	0	0	1	Entre 8 et 9	Entre 8 et 9	Entre 8 et 9	Non	Je n'ai pas la possibilité matérielle de la faire		Oui		20 minutes	Non	Je n'ai pas la possibilité matérielle de la faire		Oui		20 minutes	Non	Je n'ai pas la possibilité matérielle de la faire		Oui		20 minutes	Oui	Oui	J'ai fait de nombreuses fois l'utmb, et j'ai à chaque fois dormi de l'ordre d'une heure à Champex, dans des conditions confortables, après la douche et m'être changé.	Oui
2013-10-04 04:40:32	1	185	78	30-39	Le jour (entre 7H et 20H)	Avant 7H, Entre 12H et 14H, Le soir (après 20H)	3 à 6 h	6 à 9 h	1	2008 51ème GRR, 22ème Arc En ciel 2010 30ème GRR, 16ème 6666 Occitane 2011 11ème L'Infernal Trail 150, 29ème Citadelles 2012 54ème GRP	Entre 1 et 2h	23h	Non	5	Non	Non	Non			0	3	0	0	0	Entre 5 et 6	Entre 6 et 7	Entre 6 et 7	Non	Je n'ai pas le temps		Non	Je n'ai pas le temps		Non	Je n'ai pas le temps		Oui		1	Non	Je n'ai pas le temps		Oui		1	Oui	Oui	Cela dépend des courses. Mais je m'arrête pour une durée maximale cumulée d'1H sur des durées de course de 30H si je sens que ma fatigue mentale et physique est trop importante. Le temps "perdu" à dormir est largement compensé ensuite.	Oui
2013-10-04 04:55:21	1	171	64	50- 59	Le jour (entre 7H et 20H)	Avant 7H, Le matin (7H-12H)	6 à 9 h	12 à 15 h	2	15h30 sur la Maxi Race 2012 et 19h30 sur la CCC 2011	Entre 2 et 3h	22h	Non	3	Non	Non	Non			0	2	0	0	0	Entre 7 et 8	Entre 7 et 8	Entre 7 et 8	Non	Je n'en ressens pas le besoin		Non	Je n'en ressens pas le besoin		Non	Je n'en ressens pas le besoin		Non	Je n'en ressens pas le besoin		Non	Je n'en ressens pas le besoin		Non	Je n'en ressens pas le besoin		Oui	Non		Oui
2013-10-04 05:16:42	1	188	82	30-39	Le jour (entre 7H et 20H)	En début de soirée (18H-20H), Cela varie chaque jour	3 à 6 h	6 à 9 h	1	2013: ccc 22h16	Entre 1 et 2h	23h	Oui	2	Non	Oui	Non			0	0	0	5	0	Entre 7 et 8	Entre 8 et 9	Entre 7 et 8	Non	Je n'ai pas la possibilité matérielle de la faire		Non	Je n'en ressens pas le besoin		Non	Je n'ai pas le temps		Non	Je n'en ressens pas le besoin		Non	Je n'ai pas le temps		Non	Je n'en ressens pas le besoin		Oui	Non		Non
2013-10-04 05:23:50	2	157	53	40-49	Le jour (entre 7H et 20H)	En début de soirée (18H-20H), Cela varie chaque jour	3 à 6 h	6 à 9 h	2	je ne tiens compte que du plaisir de les faire. Mon but est toujours de finir, le mieux possible évidemment	Entre 1 et 2h	23h	Non	5 ans	Non	Oui	Non		relâchement corporel, type sophrologie	0	4	6	0	0	Entre 7 et 8	Entre 7 et 8	Entre 8 et 9	Non	Je n'ai pas le temps		Oui		20mn	Non	Je n'ai pas le temps		Oui		20mn	Oui		20mn	Oui		20mn	Oui	Non		Non
2013-10-04 05:48:45	1	176	78	40-49	Le jour (entre 7H et 20H)	Cela varie chaque jour	3 à 6 h	6 à 9 h	2	ecotrail 2013 9h58	< 1	23h	Oui	3	Non	Non	Non			8	5	0	0	0	Entre 6 et 7	Entre 7 et 8	Entre 8 et 9	Oui		1h	Oui		1h	Oui		1h	Oui		1h	Oui		1h	Oui			Oui	Non		Non
2013-10-04 05:54:14	1	171	60	50- 59	Sans emploi	Le matin (7H-12H), L'après-midi (14H-18H)	6 à 9 h	9 à 12 h	4	TOR :100ème en 2010 en 132h26 quinze jours après le GRP Raid des Pyrénées 5ème en 77h50 en 2011 GRO 26ème en 36h24 en 2012 9 x le raid du Golfe du Morbihan entre 24 et 32 heures plus beaucoup d'autres courses entre 100 et 400 km	Entre 1 et 2h	23h	Non	15	Non	Non	Non			0	0	0	0	0	Entre 8 et 9	Entre 8 et 9	Entre 8 et 9	Non			Non	Je n'en ressens pas le besoin		Non			Non	Je n'en ressens pas le besoin		Non			Non	Je n'en ressens pas le besoin		Oui	Non	pas de sommeil jusqu'à 48 heures de course	Oui
2013-10-04 06:14:10	1	178	72	40-49	Le jour (entre 7H et 20H)	Le soir (après 20H)	3 à 6 h	9 à 12 h	2	2008:utmb 39h 45 2009:utmb 38h 42 2011: ultra des templier 16h38 (106km 4800+) 2012: ptl	Entre 1 et 2h	23h	Non	5	Non	Oui	Non			0	1	3	0	0	Entre 6 et 7	Entre 6 et 7	Entre 8 et 9	Oui		15 à 30 mn	Oui		1 h	Oui		15 à 30 mn	Oui		1 h	Oui		15 à 30 mn	Oui		1 h	Oui	Non		Oui
2013-10-04 07:20:15	1	172	62	40-49	Le jour (entre 7H et 20H)	Le matin (7H-12H), Entre 12H et 14H, En début de soirée (18H-20H)	6 à 9 h	9 à 12 h	2	UTMB 2103 et 20111 UTB 2012 CCC 2009 MAXIRACE 2011 et 2012	< 1	21h	Non	2012	Non	Non	Non			0	1 à 2	0	0	0	Entre 7 et 8	Entre 8 et 9	Entre 8 et 9	Non	Je n'ai pas le temps		Oui		30 minutes	Non	Je n'ai pas le temps		Oui		30 minutes	Non	Je n'ai pas le temps		Oui		30 minutes	Oui	Non		Oui
2013-10-04 08:03:35	1	178	82	40-49	Le jour (entre 7H et 20H)	Cela varie chaque jour	3 à 6 h	6 à 9 h	3	2013 ut4m 50h, uttj . 2012 utmb ,hospitalier , 6000d 2010 utmb. Classement dans le dernier tiers	Entre 2 et 3h	23h	Oui	2	Non	Non	Non			5	4	0	0	0	Entre 6 et 7	Entre 6 et 7	Entre 7 et 8	Non	Je n'ai pas le temps		Oui		45	Non	Je n'ai pas le temps		Oui		45	Non			Oui		1	Oui	Non		Oui
2013-10-04 08:18:20	1	175	60	40-49	Le jour (entre 7H et 20H)	Le matin (7H-12H), Entre 12H et 14H, L'après-midi (14H-18H)	6 à 9 h	9 à 12 h	2	Depuis 2011, systématiquement dans les 10 premiers de chaque trail. En 2013, sur les 9 trails pour lesquels j'ai pris le départ : 1 victoire (trail de Cipières 18km pour 800m D+) 3 podiums scratch (Hermès, Roubion, l'Escarène) 4 victoires en V1 (Breil, Beaujolais village, Limaces, Ultra vercors). Cela représente au scratch 2 6ème place (Breil et BV) et 2 4ème place (limaces et Vercors) 1 abandon …	Entre 1 et 2h	22h	Oui	1	Non	Non	Non			0	1	0	0	0	Entre 7 et 8	Entre 8 et 9	Entre 8 et 9	Non	Je n'ai pas le temps		Non	Je n'en ressens pas le besoin		Non	Je n'ai pas le temps		Oui		1 heure	Non	Je n'ai pas le temps		Oui		1 heure	Non			Non
2013-10-04 08:44:08	1	176	72	30-39	Le jour (entre 7H et 20H)	En début de soirée (18H-20H)	3 à 6 h	6 à 9 h	2	approximativement car j'ai pas été vérifié : 2013 : 5h45 nivolet revard 45eme 2012 : année quasi blanche 2011 : TDG : 30eme 105h 2011 : TOE non stop : 47heures 2010 : Grande traversée des alpes : 89heures sur 15 jours(17eme) 2010 : 24h00 de grenoble : 202km ....bon après ça date un peu...utmb/diago..plus de 50ultras en 8 ans.	Entre 2 et 3h	23h	Non	6	Non	Oui	Oui	- euphytose - effinove (ce sont des compléments pas des medicaments)	- je note tout ce que j'ai dans la tete avant de me coucher - je range tout avant de me coucher - je me relaxe avec une douche	0	1	0	0	0	Entre 7 et 8	Entre 8 et 9	Entre 7 et 8	Oui		15min	Oui		60min	Oui		20min	Oui		60min	Oui		60min	Oui		60min	Oui	Oui	30 à 1h minutes vers 2h ou 4h du matin ou au moment ou j'ai sommeil.	Oui
2013-10-04 09:44:45	2	163	57	> 60	Sans emploi	Le matin (7H-12H), Entre 12H et 14H, L'après-midi (14H-18H), Cela varie chaque jour	6 à 9 h	9 à 12 h	2	UTMB 2006 38h16 GRR 2006 46h03 GRP 2009 41h40 Andora Ultra Mitic 2013 37h18	Entre 1 et 2h	jamais après 20h	Non	10	Non	Non	Non			0	3	11	0	0	Entre 7 et 8	Entre 7 et 8	Entre 7 et 8	Non	Je n'en ressens pas le besoin		Non	Je n'en ressens pas le besoin		Non	Je n'en ressens pas le besoin		Non	Je n'en ressens pas le besoin		Non	Je n'en ressens pas le besoin		Non	Je n'en ressens pas le besoin		Oui	Non		Oui
2013-10-04 09:59:21	1	185	75	40-49	Le jour (entre 7H et 20H)	Le matin (7H-12H), En début de soirée (18H-20H)	3 à 6 h	9 à 12 h	2	Gran trail Valdigne - 100° (2008) TDS 2009 : 177° CCC 2013 : 434°	< 1	22h	Non	6	Non	Non	Non			0	4	0	0	0	Entre 7 et 8	Entre 7 et 8	Entre 8 et 9	Oui	rarement ET 15mn	15mn	Non	Je n'en ressens pas le besoin	15mn	Non	rarement ET 15mn	15mn	Non	Je n'en ressens pas le besoin		Oui		15mn	Oui		15mn (je mets TOUJOURS le chrono	Oui	Non		Oui
2013-10-04 10:12:53	1	185	75	40-49	Le jour (entre 7H et 20H)	Le matin (7H-12H), En début de soirée (18H-20H)	3 à 6 h	9 à 12 h	2	Gran trail Valdigne - 100° (2008) TDS 2009 : 177° CCC 2013 : 434°	< 1	22h	Non	6	Non	Non	Non			0	4	0	0	0	Entre 7 et 8	Entre 7 et 8	Entre 8 et 9	Oui	rarement ET 15mn	15mn	Non	Je n'en ressens pas le besoin	15mn	Non	rarement ET 15mn	15mn	Non	Je n'en ressens pas le besoin		Oui		15mn	Oui		15mn (je mets TOUJOURS le chrono	Oui	Non		Oui
2013-10-04 11:49:03	1	168	59	40-49	Le jour (entre 7H et 20H)	Cela varie chaque jour	6 à 9 h	12 à 15 h	2	Pourquoi ce questionnaire n'est-il adressé qu'aux trailers et pas aux ultra marathoniens route (style 24 heures, spartathlon, ...). Je mets les réponses dans trail, mais je ne fais pas de trail, que de la route, pourtant je cours 24 heures et plus, ça ne compte pas, le marché n'est pas suffisant..? 24H circuit - 227,6 km Spartathlon (247,2 km) - 32H45	Entre 2 et 3h	23h	Non	2	Non	Non	Non			0	2	2	0	2	Entre 6 et 7	Entre 7 et 8	Entre 7 et 8	Non	Je n'en ressens pas le besoin		Non	Je n'en ressens pas le besoin		Non	Je n'en ressens pas le besoin		Non	Je n'en ressens pas le besoin		Non	Je n'ai pas la possibilité matérielle de la faire		Oui		1H30	Oui	Non		Non
2013-10-04 14:17:09	1	178	62	30-39	Le jour (entre 7H et 20H)	En début de soirée (18H-20H)	3 à 6 h	6 à 9 h	0	La grande course des Templiers 2012: 10h56 La Sainté-Lyon 2011: 9h26	Entre 2 et 3h	23h	Non	8	Non	Non	Non			0	2	2	0	0	Entre 6 et 7	Entre 9 et 10	Entre 8 et 9	Non	Je n'ai pas la possibilité matérielle de la faire		Non	Je n'ai pas le temps		Non	Je n'ai pas la possibilité matérielle de la faire		Non	Je n'ai pas le temps		Non	Je n'ai pas la possibilité matérielle de la faire		Oui		1heure	Non	Non		Non
2013-10-04 15:32:56	1	184	70	30-39	Le jour (entre 7H et 20H)	Entre 12H et 14H, En début de soirée (18H-20H)	Moins de 3 h	6 à 9 h	1	ccc 2012 en 24h	< 1	23h	Non	12	Non	Non	Non			0	0.5	1	0	0	Entre 7 et 8	Entre 8 et 9	Entre 8 et 9	Non	Je n'en ressens pas le besoin		Non	Je n'en ressens pas le besoin		Non	Je n'en ressens pas le besoin		Non	Je n'en ressens pas le besoin		Non	Je n'en ressens pas le besoin		Non	Je n'en ressens pas le besoin		Oui	Non		Non
2013-10-04 16:23:37	1	180	84	50- 59	Le jour (entre 7H et 20H)	Entre 12H et 14H	3 à 6 h	6 à 9 h	3	Utmb 2010-2011 maxirace 2012	Entre 1 et 2h	21h	Non	8	Non	Non	Non			0	6	0	0	0	Entre 6 et 7	Entre 6 et 7	Entre 6 et 7	Non	Je n'en ressens pas le besoin		Oui		0h30	Non	Je n'en ressens pas le besoin		Oui		0h30	Non	Je n'en ressens pas le besoin		Oui		0h30	Oui	Non		Oui
2013-10-04 16:46:17	2	125	92	> 60	La nuit	Cela varie chaque jour	Plus de 15 h	Plus de 15 h	0	4.30 2011	< 1	jamais après 20h	Non	30	Non	Non	Non			0	1	0	0	0	Entre 5 et 6	Entre 5 et 6	Entre 5 et 6	Non	Je n'en ressens pas le besoin		Non	Je n'en ressens pas le besoin		Non	Je n'en ressens pas le besoin		Non			Non	Je n'en ressens pas le besoin		Non	Je n'en ressens pas le besoin		Non			Non
2013-10-05 00:43:56	1	176	60	30-39	Le jour (entre 7H et 20H)	Le matin (7H-12H), L'après-midi (14H-18H), En début de soirée (18H-20H)	9 à 12 h	12 à 15 h	2	2 fois 5em a la tds 2013 et 2011 3em, 2em sur l'ultra tour du beaufortain 2013 et 209	< 1	21h	Non		Non	Oui	Non			0	2	0	0	0	Entre 8 et 9	Entre 8 et 9	Entre 8 et 9	Non	Je n'en ressens pas le besoin		Non	Je n'en ressens pas le besoin		Non	Je n'en ressens pas le besoin		Non			Non	Je n'en ressens pas le besoin		Oui		45min	Oui	Non		Non
2013-10-05 00:46:42	1	185	72	40-49	Le jour (entre 7H et 20H)	Cela varie chaque jour	3 à 6 h	6 à 9 h	2	100/250	Entre 1 et 2h	23h	Non	8	Non	Non	Non			0	3	4	0	2	Entre 6 et 7	Entre 7 et 8	Entre 8 et 9	Non	Je n'en ressens pas le besoin		Oui		30'	Non	Je n'en ressens pas le besoin		Oui		30'	Non	Je n'en ressens pas le besoin		Oui		30'	Non			Non
2013-10-05 00:55:08	1	182	82	40-49	Le jour (entre 7H et 20H)	Le matin (7H-12H), En début de soirée (18H-20H)	6 à 9 h	9 à 12 h	1	jamais finisher... sniifff	Entre 1 et 2h	21h	Non	2004	Non	Non	Non			0	3	2	0	0	Entre 8 et 9	Entre 8 et 9	Entre 8 et 9	Non	Je n'en ressens pas le besoin		Non	Je n'en ressens pas le besoin		Non	Je n'en ressens pas le besoin		Non	Je n'en ressens pas le besoin		Non	Je n'ai pas le temps		Oui			Oui	Non		Non
2013-10-05 02:38:11	2	165	48	30-39	Le jour (entre 7H et 20H)	Avant 7H, Le matin (7H-12H), Entre 12H et 14H	3 à 6 h	6 à 9 h	1	2013 : 1e f. Challenge Charles & Alice (67 km) 2013 : finir UTMB	< 1	22h	Non	8	Non	Non	Non		Quelques pages de lecture	0	0	2	0	0	Entre 6 et 7	Entre 6 et 7	Entre 6 et 7	Non	Je n'ai pas la possibilité matérielle de la faire		Oui		20 mn	Non	Je n'ai pas la possibilité matérielle de la faire		Oui		20 mn	Non	Je n'ai pas la possibilité matérielle de la faire		Oui		20 mn	Oui	Non		Oui
2013-10-05 03:14:04	1	168	71	> 60	Sans emploi	Le matin (7H-12H), L'après-midi (14H-18H)	3 à 6 h	6 à 9 h	4	2011 TDS 301ème 2010 montagnard 30ème1er V3 2012 UTMB 1480 2012 Ardechois endurance trail 71ème	Entre 1 et 2h	23h	Non	5	Non	Non	Non			0	1	3	0	0	Entre 6 et 7	Entre 6 et 7	Entre 6 et 7	Oui		20 à 30 mn	Oui			Oui		5 à 10 mn	Oui		20 à 30 mn	Oui		5mn	Oui		20 à 30 mn	Oui	Non		Non
2013-10-05 04:36:48	1	184	72	40-49	Le jour (entre 7H et 20H)	Cela varie chaque jour	9 à 12 h	12 à 15 h	3	je ne sais plus trop...	Entre 1 et 2h	21h	Oui	2	Non	Non	Non			0	3	1	0	0	Entre 7 et 8	Entre 8 et 9	Entre 8 et 9	Non	Je n'ai pas le temps		Oui		1	Non			Non			Non			Oui		1	Oui			Non
2013-10-05 05:41:27	1	183	70	30-39	Le jour (entre 7H et 20H)	En début de soirée (18H-20H)	9 à 12 h	12 à 15 h	4	102km coursieres des hauts du lyonnais 2010 en 13h45 105km endurance trail templier 2012 en 17h 105km UTPMA 2013 en 18h 100km verdon canyon challenge 2011 en 23h et d'autre ultra en mode balade	Entre 1 et 2h	22h	Non	5	Non	Non	Non			0	2	0	0	1	Entre 7 et 8	Entre 8 et 9	Entre 8 et 9	Non	Je n'ai pas le temps		Oui		20min	Non			Oui		20min	Non	Je n'ai pas le temps		Oui		20min	Oui	Non		Non
2013-10-05 05:51:12	1	173	60	50- 59	Le jour (entre 7H et 20H)	Avant 7H, Entre 12H et 14H	12 à 15 h	Plus de 15 h	3	UT4M 2013 -> 21em	< 1	21h	Non	4	Non	Non	Non			0	4	0	0	0	Entre 6 et 7	Entre 7 et 8	Entre 7 et 8	Non	Je n'en ressens pas le besoin		Non	Je n'en ressens pas le besoin		Non	Je n'en ressens pas le besoin		Non	Je n'en ressens pas le besoin		Non	Je n'en ressens pas le besoin		Non	Je n'en ressens pas le besoin		Oui	Non		Non
2013-10-05 07:54:50	1	180	68	> 60	Sans emploi	Le matin (7H-12H)	3 à 6 h	6 à 9 h	2	UTMB 2009 45H34	Entre 2 et 3h	21h	Non	10	Non	Non	Non			0	2	0	1	1	Entre 8 et 9	Entre 8 et 9	Entre 8 et 9	Non	Je n'en ressens pas le besoin		Non	Je n'en ressens pas le besoin		Non	Je n'en ressens pas le besoin		Non	Je n'en ressens pas le besoin		Non	Je n'en ressens pas le besoin		Non	Je n'en ressens pas le besoin		Oui	Non		Oui
2013-10-05 09:52:07	1	185	79	50- 59	Le jour (entre 7H et 20H)	Le matin (7H-12H), Le soir (après 20H)	Moins de 3 h	3 à 6 h	1	UTMB 2007 44H41	< 1	22h	Oui	3	Non	Non	Non			1	2	2	0	0	Entre 6 et 7	Entre 7 et 8	Entre 7 et 8	Non	Je n'en ressens pas le besoin		Non	Je n'en ressens pas le besoin		Non	Je n'en ressens pas le besoin		Non	Je n'en ressens pas le besoin		Non	Je n'en ressens pas le besoin		Non	Je n'en ressens pas le besoin		Oui	Non		Oui
2013-10-05 10:59:25	1	179	76	50- 59	Le jour (entre 7H et 20H)	Avant 7H, Le matin (7H-12H)	9 à 12 h	9 à 12 h	5 et +	3 eme place sur Transhariana , 3 jours et 2 nuits sans dormir en 2009	< 1	21h	Non	2 ans	Non	Non	Non			0	7	0	0	0	Entre 6 et 7	Entre 7 et 8	Entre 7 et 8	Non	Je n'en ressens pas le besoin		Non	Je n'en ressens pas le besoin		Non	Je n'en ressens pas le besoin		Non	Je n'en ressens pas le besoin		Non	Je n'ai pas le temps		Oui		30 mn	Oui	Non		Oui
2013-10-05 11:39:13	1	173	65	40-49	Le jour (entre 7H et 20H)	Le matin (7H-12H), Entre 12H et 14H	3 à 6 h	6 à 9 h	0	Pas de trail. De + 80 km Un 2x50 km sur 2 jours en 2013	Entre 2 et 3h	22h	Oui	1	Non	Non	Non		Musique de relaxation Lecture Vidéo	0	0	1	0	0	Entre 6 et 7	Entre 7 et 8	Entre 7 et 8	Non	Je n'ai pas le temps		Oui		20 min	Non	Je n'ai pas le temps		Oui		30 min	Non	Je n'ai pas le temps		Oui		1h	Non			Non
2013-10-10 04:35:10	2	170	55	40-49	Le jour (entre 7H et 20H)	Le matin (7H-12H), En début de soirée (18H-20H)	9 à 12 h	9 à 12 h	3	2011: raid du golfe du Morbihan 180km 30h50 (2012: 100km de Belves 10h50 ce n'est pas du trail mais...) 2013: semi raid du golfe du Morbihan 86 km10h45	Entre 2 et 3h	22h	Non	10	Non	Non	Non		la lecture	0	1	1	1	1	Entre 7 et 8	Entre 8 et 9	Entre 8 et 9	Non	Je n'en ressens pas le besoin		Non	Je n'en ressens pas le besoin		Non	Je n'en ressens pas le besoin		Non	Je n'en ressens pas le besoin		Oui		15-20 min	Oui		30min-1h00	Oui	Non		Oui
2013-10-05 15:47:58	1	180	72	40-49	Le jour (entre 7H et 20H)	Entre 12H et 14H	3 à 6 h	6 à 9 h	2	2009 : TransAq 2010 : 24h00/154km 2011 : Ultra Raid du Morbihan 2013 : Ultra GRP	Entre 1 et 2h	Minuit	Non	10	Non	Non	Non			0	1	2	0	1	Entre 5 et 6	Entre 6 et 7	Entre 6 et 7	Non	Je n'ai pas la possibilité matérielle de la faire		Non	Je n'ai pas la possibilité matérielle de la faire		Non	Je n'ai pas la possibilité matérielle de la faire		Non	Je n'ai pas la possibilité matérielle de la faire		Non	Je n'ai pas la possibilité matérielle de la faire		Non	Je n'ai pas la possibilité matérielle de la faire		Oui	Oui	Pour une course de 24h00 non oui pour une course de 32h00 (20 minutes) ( abandon à l'integrale de Riquet)	Non
2013-10-06 05:16:51	1	184	70	30-39	Le jour (entre 7H et 20H)	Entre 12H et 14H	6 à 9 h	9 à 12 h	3	153km sur 24h en 2012 6666 en 2013	< 1	21h	Non	2	Non	Non	Non			0	0	5	0	0	Entre 6 et 7	Entre 7 et 8	Entre 6 et 7	Non	Je n'ai pas la possibilité matérielle de la faire		Oui		20min	Non	Je n'ai pas la possibilité matérielle de la faire		Oui		30min	Non	Je n'ai pas la possibilité matérielle de la faire		Oui		1h	Oui	Oui	31h et 45min de sommeil Avant le coup de barre rt à un point de contrôle	Oui
2013-10-06 06:52:02	1	167	62	30-39	Le jour (entre 7H et 20H)	En début de soirée (18H-20H)	6 à 9 h	12 à 15 h	0	saintelyon 8h19	> 3h	plus tard que minuit	Oui	5 ans	Non	Oui	Non		concentration sur la respiration	0	4	0	2	0	Entre 6 et 7	Entre 7 et 8	Entre 7 et 8	Non	Je n'ai pas le temps		Non	Je n'en ressens pas le besoin		Non	Je n'en ressens pas le besoin		Non	Je n'en ressens pas le besoin		Non	Je n'ai pas le temps		Oui		15 minutes	Oui	Non		Non
2013-10-06 08:45:18	1	178	75	30-39	Le jour (entre 7H et 20H)	L'après-midi (14H-18H)	6 à 9 h	12 à 15 h	3	Ultr'ardèche 2012 : 27h41 Raid de l'Archange 2013 : une cinquantaine d'heures	> 3h	21h	Non	5	Non	Non	Non			0	5	0	0	0	Entre 6 et 7	Entre 8 et 9	Entre 8 et 9	Non	Je n'ai pas le temps		Oui		30 minutes	Non	Je n'ai pas le temps		Oui		30 minutes	Non	Je n'ai pas le temps		Oui		30 minutes	Oui	Non		Oui
2013-10-06 09:40:39	1	175	62	30-39	Le jour (entre 7H et 20H)	Cela varie chaque jour	6 à 9 h	12 à 15 h	2	finisher ut4m 2013	Entre 1 et 2h	22h	Oui	2	Non	Oui	Non			0	3	0	0	0	Entre 5 et 6	Entre 6 et 7	Entre 6 et 7	Oui		30mn	Non	Je n'en ressens pas le besoin		Oui		30mn	Oui		20mn	Oui		30mn	Non	Je n'en ressens pas le besoin		Oui	Non		Non
2013-10-06 09:53:25	1	170	65	40-49	La nuit	Le matin (7H-12H)	6 à 9 h	12 à 15 h	1	53 éme CCC 2012 .	Entre 1 et 2h	22h	Non	10	Non	Non	Non			0	0	2	0	0	Entre 7 et 8	Entre 7 et 8	Entre 8 et 9	Non	Je n'en ressens pas le besoin		Oui		30	Oui		15	Oui		30	Non	Je n'ai pas le temps		Oui		60	Oui	Non		Oui
2013-10-06 13:31:28	1	176	67	40-49	Le jour (entre 7H et 20H)	Avant 7H, Le matin (7H-12H), Le soir (après 20H), Cela varie chaque jour	6 à 9 h	Plus de 15 h	2	UTMB 20O9 : 37 100 km bugey 2011 : 4 Tour oisans 2011 : 6 Tor des Géants 2012 : 8/11 Montagn'hard 2012: 9 Tor des Géants 2013 : 12	Entre 2 et 3h	Minuit	Non	9	Non	Non	Non			0	5	0	0	1	Entre 7 et 8	Entre 7 et 8	Entre 7 et 8	Non	Je n'ai pas la possibilité matérielle de la faire		Non	Je n'en ressens pas le besoin		Non	Je n'ai pas la possibilité matérielle de la faire		Non	Je n'en ressens pas le besoin		Non	Je n'ai pas la possibilité matérielle de la faire		Oui		30	Oui	Non		Non
2013-10-06 13:37:54	1	179	64	50- 59	Le jour (entre 7H et 20H)	L'après-midi (14H-18H)	3 à 6 h	6 à 9 h	3	UTMB 2005/6/7 Verbier St Bernard 2009/10/12 TOR 2012 Défi de l'Oisan TOE 2011 Eiger trail 2012 Trans'Aq 2009 Swiss Jura Marathon 2000/8 ...	Entre 1 et 2h	21h	Non	8	Non	Non	Non		J'évite de ressasser les problèmes	0	1	1	1	0.5	Entre 6 et 7	Entre 7 et 8	Entre 7 et 8	Oui		30'-40'	Oui		30'-40'	Oui		30'-40'	Oui		30'-40'	Oui		30'-40'	Oui		30'-40'	Oui	Non		Oui
2013-10-06 14:42:58	1	180	81	40-49	Le jour (entre 7H et 20H)	Avant 7H, Entre 12H et 14H, Le soir (après 20H)	3 à 6 h	6 à 9 h	2	2006 UTMB 164ème sinon, plutôt autour de 15-25% du classement (encore en 2013)	Entre 1 et 2h	22h	Non	1	Non	Non	Non			0	2017-10-08	0	2017-02-01	0.3	Entre 6 et 7	Entre 7 et 8	Entre 7 et 8	Non	Je n'en ressens pas le besoin		Non	Je n'en ressens pas le besoin		Non	Je n'en ressens pas le besoin		Non	Je n'en ressens pas le besoin		Non	Je n'en ressens pas le besoin		Non	Je n'en ressens pas le besoin		Oui	Non		Oui
2013-10-06 14:56:59	1	182	65	50- 59	Le jour (entre 7H et 20H)	Le matin (7H-12H), Entre 12H et 14H, Le soir (après 20H)	6 à 9 h	9 à 12 h	3	Gran Trail Valdigne 2007 UTMB 2007 Trail du Mercantour 2009 UTMB 2009 Endurance Ultra Trail Templiers 2009 Tor des Géants 2010 Tour Oisans Ecrins non stop 2011 Tor des Géants 2011 UTPMA 2013 Echappée Belle 2013	Entre 2 et 3h	23h	Non	1	Non	Non	Non			jamais	2	zéro	zéro	0,5	Entre 7 et 8	Entre 8 et 9	Entre 8 et 9	Non	Je n'ai pas le temps		Non	pas l'habitude...		Non	Je n'ai pas le temps		Oui		Parfois si manque de sommeil, 30'	Non	Je n'ai pas le temps		Oui		Parfois, 30' à 1h30	Non	Non		Oui
2013-10-06 15:11:33	1	180	75	30-39	Le jour (entre 7H et 20H)	Entre 12H et 14H, En début de soirée (18H-20H)	3 à 6 h	6 à 9 h	0	54 km 5h38 2013	< 1	22h	Oui	3	Non	Non	Non			0	2	1	1	2	Entre 7 et 8	Entre 8 et 9	Entre 9 et 10	Non	Je n'ai pas le temps		Non	Je n'ai pas le temps		Non	Je n'ai pas le temps		Non	Je n'ai pas le temps		Non	Je n'ai pas le temps		Non	Je n'ai pas le temps		Non			Non
2013-10-06 15:44:21	1	186	80	30-39	Le jour (entre 7H et 20H)	Le matin (7H-12H), Entre 12H et 14H, Cela varie chaque jour	3 à 6 h	9 à 12 h	1		Entre 1 et 2h	23h	Non	3	Non	Non	Non			0	2	0	0	0	Entre 7 et 8	Entre 9 et 10	Entre 9 et 10	Non	Je n'ai pas le temps		Non	Je n'ai pas le temps		Non	Je n'ai pas le temps		Non	Je n'ai pas le temps		Non	Je n'ai pas le temps		Non	Je n'ai pas le temps		Oui	Oui	30 mn apres 24h	Oui
2013-10-07 05:55:25	1	170	56	40-49	Le jour (entre 7H et 20H)	Le matin (7H-12H), Entre 12H et 14H, En début de soirée (18H-20H)	3 à 6 h	6 à 9 h	0	2012 13h37 les templiers	< 1	21h	Non	2007	Non	Non	Non			0	3	0	0	5	Entre 7 et 8	Entre 8 et 9	Entre 8 et 9	Oui		50mn	Oui		50mn	Oui		50mn	Oui		50mn	Oui		50mn	Oui		50mn	Non			Non
2013-10-07 07:13:17	1	182	75	30-39	Le jour (entre 7H et 20H)	En début de soirée (18H-20H)	6 à 9 h	12 à 15 h	2	saintelyon 2012 534 en 8h34	Entre 1 et 2h	22h	Non	10	Non	Non	Non			0	1	1	0	1	Entre 7 et 8	Entre 7 et 8	Entre 7 et 8	Oui		15	Oui		15	Oui		15	Oui		15	Oui		15	Oui		15	Oui	Non		Non
2013-10-07 07:20:46	2	165	54	40-49	Le jour (entre 7H et 20H)	Cela varie chaque jour	6 à 9 h	12 à 15 h	2	tds 2013 ccc 2012	Entre 1 et 2h	22h	Non	5	Oui	Non	Non			0	6	0	0	0	Entre 6 et 7	Entre 6 et 7	Entre 6 et 7	Non	Je n'ai pas le temps		Non	Je n'ai pas le temps		Non	Je n'ai pas le temps		Non	Je n'ai pas le temps		Non			Non	Je n'ai pas le temps		Oui	Oui	30mn à un ravito sur 29 h de course	Non
2013-10-07 07:49:17	1	174	69	40-49	Le jour (entre 7H et 20H)	En début de soirée (18H-20H)	6 à 9 h	9 à 12 h	2	2010 GRP80 en 16h	Entre 2 et 3h	23h	Non	10	Non	Non	Non			0	1	0	0	0	Entre 6 et 7	Entre 7 et 8	Entre 7 et 8	Oui		15	Oui		20	Oui		15	Oui		20	Oui		15	Oui		30	Oui	Non		Non
2013-10-07 09:26:07	1	175	72	30-39	Le jour (entre 7H et 20H)	Avant 7H, Entre 12H et 14H, Le soir (après 20H)	6 à 9 h	12 à 15 h	2	27eme / trail de vulcain 63km / 2011 le reste... milieu de peloton	Entre 2 et 3h	21h	Non	8	Non	Non	Non			0	0	0	0	4	Entre 6 et 7	Entre 7 et 8	Entre 8 et 9	Non	Je n'en ressens pas le besoin		Non	Je n'en ressens pas le besoin		Non	Je n'en ressens pas le besoin		Non	Je n'en ressens pas le besoin		Oui		30 min	Oui		30 min	Non	Oui		Oui
2013-10-07 09:36:20	1	175	68	40-49	Le jour (entre 7H et 20H)	Le matin (7H-12H), En début de soirée (18H-20H)	6 à 9 h	12 à 15 h	3	5	Entre 1 et 2h	22h	Oui	3	Non	Non	Non			o	2	1	o	o	Entre 7 et 8	Entre 7 et 8	Entre 7 et 8	Oui		15	Oui			Oui		15	Oui		15	Oui		15	Oui		15	Oui	Non		Non
2013-10-07 09:58:20	1	173	65	18- 29	Le jour (entre 7H et 20H)	Cela varie chaque jour	Moins de 3 h	3 à 6 h	1	12h tour des fiz	< 1	22h	Non	2	Non	Non	Non			0	0	1	1	0	Entre 7 et 8	Entre 9 et 10	Entre 9 et 10	Non	Je n'ai pas le temps		Oui		1h	Non	Je n'ai pas le temps		Non	Je n'ai pas le temps		Non	Je n'ai pas le temps		Oui		1h	Non	Non		Non
2013-10-07 10:02:19	1	180	74	40-49	Le jour (entre 7H et 20H)	Avant 7H, Le matin (7H-12H)	3 à 6 h	6 à 9 h	1	33è de l'Echappée Belle en 38h	Entre 1 et 2h	22h	Non	2	Non	Non	Non			0	1	0	0	0	Entre 8 et 9	Entre 8 et 9	Entre 8 et 9	Non	Je n'en ressens pas le besoin		Non	Je n'en ressens pas le besoin		Non	Je n'en ressens pas le besoin		Non	Je n'en ressens pas le besoin		Non	Je n'ai pas le temps		Non	Je n'en ressens pas le besoin		Oui	Non		Non
2013-10-07 10:18:19	2	163	54	40-49	Le jour (entre 7H et 20H)	L'après-midi (14H-18H)	3 à 6 h	6 à 9 h	0	0	> 3h	23h	Non	1	Non	Non	Non			0	0	0	0	0	Entre 6 et 7	Entre 7 et 8	Entre 8 et 9	Non			Non			Non			Non			Non			Non			Non			Non
2013-10-07 10:56:36	1	172	72	30-39	Le jour (entre 7H et 20H)	L'après-midi (14H-18H), En début de soirée (18H-20H)	6 à 9 h	9 à 12 h	1	Royal Raid, 10hr10	Entre 1 et 2h	21h	Non	3	Non	Non	Non		Ecouter une radio	0	2	0	0	0	Entre 7 et 8	Entre 7 et 8	Entre 8 et 9	Non	Je n'ai pas la possibilité matérielle de la faire		Oui		60min	Non	Je n'ai pas la possibilité matérielle de la faire		Oui		60min	Non	Je n'ai pas la possibilité matérielle de la faire		Oui		120min	Non			Non
2013-10-07 12:12:30	1	185	77	40-49	Le jour (entre 7H et 20H)	L'après-midi (14H-18H)	3 à 6 h	12 à 15 h	2	finisher utmb 2006 et 2009 top 100 gr73 2007 GTA en off en 15 jours en 2012 18eme v1 ecotrail sommand 2013	Entre 1 et 2h	22h	Non	10	Non	Non	Non			0	1	4	0	0	Entre 6 et 7	Entre 7 et 8	Entre 8 et 9	Non	Je n'ai pas le temps		Oui		20mn	Non	Je n'ai pas le temps		Oui		20mn	Non	Je n'ai pas le temps		Oui		40mn	Oui	Non		Oui
2013-10-07 12:14:46	1	185	84	18- 29	Le jour (entre 7H et 20H)	Avant 7H	3 à 6 h	6 à 9 h	0	.	Entre 1 et 2h	22h	Non	1	Non	Non	Non			0	0	0	0	1	Entre 7 et 8	Entre 7 et 8	Entre 8 et 9	Oui		10	Non	Je n'en ressens pas le besoin		Non	Je n'en ressens pas le besoin		Oui		60	Non	Je n'en ressens pas le besoin		Oui		90	Non			Non
2013-10-07 12:51:58	1	182	75	50- 59	Le jour (entre 7H et 20H)	Le matin (7H-12H), Entre 12H et 14H	3 à 6 h	9 à 12 h	1	2006 utmb 115éme	Entre 2 et 3h	21h	Oui	4 ans	Non	Non	Non			0	2017-04-03	0	0	0	Entre 7 et 8	Entre 7 et 8	Entre 9 et 10	Oui		10/15 mn	Oui		10/15 mn	Non	Je n'ai pas le temps		Oui		10/15 mn	Non	Je n'ai pas le temps		Oui		10/15 mn	Oui	Non		Oui
2013-10-07 13:25:03	1	171	60	50- 59	Le jour (entre 7H et 20H)	Avant 7H, Le matin (7H-12H), L'après-midi (14H-18H), Cela varie chaque jour	9 à 12 h	12 à 15 h	2	10:37 80Km	Entre 2 et 3h	23h	Non	1	Non	Non	Non			0	1	4	0	0	Entre 6 et 7	Entre 6 et 7	Entre 6 et 7	Oui		30 minutes	Oui		30 minutes	Oui		30 minutes	Oui		30 minutes	Oui		30 minutes	Oui		30 minutes	Oui	Oui	en bord du sentier, 1 heure	Oui
2013-10-07 13:25:28	1	171	60	50- 59	Le jour (entre 7H et 20H)	Avant 7H, Le matin (7H-12H), L'après-midi (14H-18H), Cela varie chaque jour	9 à 12 h	12 à 15 h	2	10:37 80Km	Entre 2 et 3h	23h	Non	1	Non	Non	Non			0	1	4	0	0	Entre 6 et 7	Entre 6 et 7	Entre 6 et 7	Oui		30 minutes	Oui		30 minutes	Oui		30 minutes	Oui		30 minutes	Oui		30 minutes	Oui		30 minutes	Oui	Oui	en bord du sentier, 1 heure	Oui
2013-10-07 14:21:43	1	167	62	30-39	Le jour (entre 7H et 20H)	Le matin (7H-12H), Entre 12H et 14H	6 à 9 h	9 à 12 h	1	80 km du mont blanc : 17h30 et 200ème/650 env	Entre 2 et 3h	23h	Non	2	Non	Non	Non			0	0	2	0	0	Entre 7 et 8	Entre 7 et 8	Entre 7 et 8	Non	Je n'ai pas le temps		Oui		20 min	Non	Je n'ai pas le temps		Oui		20 min	Non	Je n'ai pas le temps		Oui		20 min	Non			Non
2013-10-07 14:39:29	1	170	59	40-49	Le jour (entre 7H et 20H)	Entre 12H et 14H	9 à 12 h	Plus de 15 h	3	MOC 2009 4ème CCC 2009 7ème TGV 2009 3ème SaintéLyon 2009 4ème Endurance des Templiers 2010 3ème CCC 2010 9ème CCC 2011 5ème Maxi Race 2012 8ème Trail St Jacques 2012 1er SaintéLyon 2012 8ème	Entre 1 et 2h	23h	Non	10	Non	Non	Non		étirement puis dodo	0	0	0	0	0	Entre 6 et 7	Entre 7 et 8	Entre 8 et 9	Non	Je n'en ressens pas le besoin		Non	Je n'en ressens pas le besoin		Non	Je n'en ressens pas le besoin		Non	Je n'en ressens pas le besoin		Non	Je n'en ressens pas le besoin		Non	parfois, rarrement		Oui	Non		Non
2013-10-07 17:24:07	2	168	44	30-39	Le jour (entre 7H et 20H)	Cela varie chaque jour	Plus de 15 h	Plus de 15 h	3	pas encore trop d'ultras : seulement 4 ème de la CCC 2012 PUIS DES TRAILS LONGS 80kms eco trail de paris : 1ère en 2008 ; 2ème 2011 Ice trail tarentaise 1ère en 2012	< 1	22h	Non	1	Non	Non	Non			0	2	2	0	0	Entre 7 et 8	Entre 8 et 9	Entre 8 et 9	Non	Je n'ai pas le temps		Non	Je n'ai pas le temps		Non			Non	je ne m'en donne pas trop le droit		Non	Je n'ai pas le temps		Non	je n e m'en donne pas le droit		Non			Non
2013-10-07 21:40:47	1	171	65	30-39	Le jour (entre 7H et 20H)	L'après-midi (14H-18H)	6 à 9 h	12 à 15 h	1	4eme	Entre 2 et 3h	22h	Non	il y a 1 semaine	Non	Non	Non	Rien	Aucune	rien	3	0	0	0	Entre 7 et 8	Entre 7 et 8	Entre 7 et 8	Non	Je n'en ressens pas le besoin		Oui		1hr30	Non	Je n'en ressens pas le besoin		Oui		1hr30	Non	Je n'ai pas le temps		Oui		2hr	Oui	Oui	Après 30 heures de course j'ai dormi 1hr pour repartir pour encore 13heures de course	Oui
2013-10-07 23:42:18	1	172	65	50- 59	Le jour (entre 7H et 20H)	Entre 12H et 14H, En début de soirée (18H-20H)	6 à 9 h	9 à 12 h	1	160e Tds 2012	< 1	22h	Non	4	Non	Non	Non			0	1	0	0	1	Entre 7 et 8	Entre 8 et 9	Entre 8 et 9	Non	Je n'en ressens pas le besoin		Non			Non	Je n'ai pas le temps		Oui		30 mn	Non	Je n'ai pas le temps		Oui		30 mn	Oui	Non		Non
2013-10-08 04:25:32	2	170	53	40-49	Sans emploi	L'après-midi (14H-18H), En début de soirée (18H-20H)	6 à 9 h	Plus de 15 h	3	10 eme feminine à UTB 2013	Entre 1 et 2h	22h	Non	4	Oui	Oui	Non			0	3	0	0	0	Entre 6 et 7	Entre 7 et 8	Entre 7 et 8	Non	Je n'ai pas le temps		Non	Je n'en ressens pas le besoin		Non	Je n'en ressens pas le besoin		Non	Je n'en ressens pas le besoin		Oui			Oui			Oui	Non		Non
2013-10-08 04:49:00	1	175	68	30-39	Le jour (entre 7H et 20H)	Avant 7H	6 à 9 h	12 à 15 h	2	9h20: Royal raid,80km en 2013 15h59: Vibram100 a Hong Kong en 2012 39h: UTMB en 2013	Entre 1 et 2h	22h	Non	2ans	Non	Non	Non			0	1	1	0	1	Entre 7 et 8	Entre 7 et 8	Entre 7 et 8	Non	Je n'ai pas le temps		Non	Je n'ai pas le temps		Non	Je n'ai pas le temps		Non	Je n'ai pas le temps		Non	Je n'ai pas le temps		Non	Je n'ai pas le temps		Oui	Non		Oui
2013-10-08 05:54:00	1	181	78	50- 59	Le jour (entre 7H et 20H)	En début de soirée (18H-20H)	9 à 12 h	Plus de 15 h	2	ccc 2010 57 aubrac 2012 22 ventoux2009 10	Entre 1 et 2h	22h	Non	2	Non	Non	Non			0	0	1	0	0	Entre 5 et 6	Entre 5 et 6	Entre 5 et 6	Oui		15 mn	Oui		15 mn	Oui		15 mn	Oui		15 mn	Oui		15 mn	Oui		15 mn	Oui	Non		Non
2013-10-08 06:27:19	1	175	70	30-39	La nuit	L'après-midi (14H-18H), En début de soirée (18H-20H)	6 à 9 h	12 à 15 h	4	102km en 17h00 2013	Entre 1 et 2h	je ne regarde jamais d'écran	Non	8	Non	Non	Non			aucune	5	aucune	aucun	aucun	Entre 5 et 6	Entre 6 et 7	Entre 8 et 9	Non	Je n'en ressens pas le besoin	30minutes	Non	Je n'en ressens pas le besoin	30minutes	Non	Je n'en ressens pas le besoin		Non	Je n'en ressens pas le besoin		Non	Je n'en ressens pas le besoin		Non	Je n'en ressens pas le besoin		Oui	Oui	7h30 ,pendant 30minutes	Non
2013-10-08 07:17:07	1	172	61	40-49	Le jour (entre 7H et 20H)	L'après-midi (14H-18H)	9 à 12 h	Plus de 15 h	3	9hr30 pour 80 km 3000mt deniv+	Entre 2 et 3h	22h	Non	20	Non	Non	Non		aucune	non fumeur	nil	1	nil	nil	Entre 7 et 8	Entre 7 et 8	Entre 7 et 8	Non	Je n'en ressens pas le besoin		Non	Je n'en ressens pas le besoin		Non	Je n'en ressens pas le besoin		Non	Je n'en ressens pas le besoin		Non	Je n'en ressens pas le besoin		Non	Je n'en ressens pas le besoin		Oui	Oui	Apres 24 hrs sur le bord du sentier.	Oui
2013-10-08 09:11:39	1	177	71	30-39	Le jour (entre 7H et 20H)	En début de soirée (18H-20H), Le soir (après 20H)	3 à 6 h	9 à 12 h	3	1er CCC 1er au Libyan Challenge 1er GTA (14étapes) 2è du grand Raid Manikou 2x1er au Tchimbé Raid Martinique 4è au Swiss Iron Trail 9è,14è & 23è au Grand Raid de la Réunion	Entre 1 et 2h	Minuit	Non	2	Non	Non	Non		la lecture si besoin ou rien!	0	0	1	0	0	Entre 6 et 7	Entre 7 et 8	Entre 7 et 8	Non	Je n'ai pas le temps		Non	Je n'en ressens pas le besoin		Non	Je n'ai pas le temps		Non	Je n'en ressens pas le besoin		Oui		30min	Non	Je n'en ressens pas le besoin		Oui	Non		Non
2013-10-08 11:00:48	1	175	70	50- 59	Le jour (entre 7H et 20H)	En début de soirée (18H-20H)	Moins de 3 h	3 à 6 h	0	2013	< 1	jamais après 20h	Oui	3	Oui	Oui	Non			0	0	1	0	0	Entre 6 et 7	Entre 6 et 7	Entre 7 et 8	Oui		15 mm	Oui		20 mm	Oui		15 mm	Oui		15	Oui		20 mm	Oui		20 mm	Non			Non
2013-10-08 11:04:36	1	169	63	40-49	Le jour (entre 7H et 20H)	Entre 12H et 14H	6 à 9 h	6 à 9 h	1	2013 TDS 23h20 157ème 2012 GRP80 15h20 146ème	Entre 1 et 2h	22h	Non	1	Non	Non	Non		Je ferme les yeux et je dors...instantanément...	0	3	0	0	1	Entre 7 et 8	Entre 7 et 8	Entre 8 et 9	Non	Je n'ai pas la possibilité matérielle de la faire		Oui		30 minutes	Non	Je n'ai pas la possibilité matérielle de la faire		Oui		30 minutes	Non	Je n'ai pas la possibilité matérielle de la faire		Oui		1 heure	Oui	Non		Non
2013-10-08 11:20:08	1	175	65	40-49	Le jour (entre 7H et 20H)	En début de soirée (18H-20H)	3 à 6 h	9 à 12 h	2	ULTRA BEAUFORTAIN 2011 : 35ème en 17:19 UTMB 2012 : 518ème en 18:06 GRAND DUC CHARTREUSE 2013 : 29ème en 13:02 UTMB 2013 : 430ème en 36:24	Entre 1 et 2h	23h	Non	1	Non	Non	Non			0	1	1	0	0	Entre 7 et 8	Entre 8 et 9	Entre 9 et 10	Non	Je n'ai pas le temps		Oui		1 h	Non	Je n'ai pas le temps		Oui		1 h	Non	Je n'ai pas le temps		Oui		1h	Oui	Oui	Pas de temps de sommeil sur UTMB 2012 mais forte somnolence "en route" au petit matin du samedi, après ravito des Houches. Arrivée Chamonix vers 13 H. Temps total 18:05	Oui
2013-10-08 11:41:16	1	174	70	40-49	Le jour (entre 7H et 20H)	L'après-midi (14H-18H), En début de soirée (18H-20H), Le soir (après 20H)	6 à 9 h	12 à 15 h	1	271 -> GRP 2012 170 -> UTPMA 2013	Entre 1 et 2h	22h	Oui	10	Non	Non	Non			0	0.5	3	0	0	Entre 5 et 6	Entre 8 et 9	Entre 9 et 10	Non	Je n'en ressens pas le besoin		Non	Je n'en ressens pas le besoin		Oui		15mn	Non	Je n'en ressens pas le besoin		Oui		15mn	Non	Je n'en ressens pas le besoin		Oui	Non		Oui
2013-10-08 11:44:28	1	182	71	50- 59	Le jour (entre 7H et 20H)	Le matin (7H-12H), L'après-midi (14H-18H)	3 à 6 h	6 à 9 h	2	6000d- 2009	Entre 1 et 2h	22h	Non	3	Non	Oui	Non			0	4	0	0	0/1	Entre 5 et 6	Entre 6 et 7	Entre 7 et 8	Non	je n ai pas eu l habitude		Non	Je n'en ressens pas le besoin		Non	Je n'ai pas le temps		Non	Je n'en ressens pas le besoin		Non	Je n'ai pas le temps		Non	Je n'en ressens pas le besoin		Oui	Non		Non
2013-10-08 11:49:02	1	177	76	30-39	Le jour (entre 7H et 20H)	Le matin (7H-12H), L'après-midi (14H-18H), En début de soirée (18H-20H)	6 à 9 h	12 à 15 h	2	Eiger Ultra Trail E101 / 18h43min46sec Moutainman Ultra / 14h05min10sec	Entre 1 et 2h	21h	Non	5	Non	Non	Non			0	0	0	2	0	Entre 7 et 8	Entre 9 et 10	Entre 9 et 10	Oui		45mim	Oui		45min	Oui		45min	Oui		45min	Oui		45min	Oui		45min	Oui	Non		Non
2013-10-08 11:56:02	2	163	61	40-49	La nuit	Le matin (7H-12H), L'après-midi (14H-18H)	3 à 6 h	6 à 9 h	1	2007 diagonale des fous 58h 2008 guerledan 7h34 2005 raid des trolls 19h 45 en 5 étapes	< 1	jamais après 20h	Non	5	Non	Non	Non			0	5	0	0	0	Entre 5 et 6	Entre 8 et 9	Entre 8 et 9	Oui		1h30	Oui		1h30	Oui		2h	Oui		1h30	Oui		2h	Oui		1h30	Oui	Non	raid du golf du morbihan 80km 12 h de course 0 h de sommeil 12 h de Séné 1h de sommeil car froid	Non
2013-10-08 12:00:42	1	166	60	50- 59	Le jour (entre 7H et 20H)	L'après-midi (14H-18H), En début de soirée (18H-20H), Le soir (après 20H)	3 à 6 h	9 à 12 h	1	Finisher 2/2 ( coursières, 6666)	Entre 1 et 2h	23h	Non	2	Non	Non	Non			0	3	1	0	0	Entre 7 et 8	Entre 8 et 9	Entre 8 et 9	Non	Je n'en ressens pas le besoin		Non	Je n'en ressens pas le besoin		Non	Je n'en ressens pas le besoin		Non	Je n'en ressens pas le besoin		Non	Je n'en ressens pas le besoin		Non	Je n'en ressens pas le besoin		Oui	Non		Non
2013-10-08 12:09:01	1	176	65	40-49	Le jour (entre 7H et 20H)	En début de soirée (18H-20H)	6 à 9 h	12 à 15 h	2	2012, 25 heures pour 156km et 2100d+	Entre 2 et 3h	22h	Non	18	Non	Oui	Non		la lecture	0	2	0	0	1	Entre 6 et 7	Entre 6 et 7	Entre 6 et 7	Oui		45mn	Oui		45mn	Oui		45mn	Oui		45mn	Oui		45mn	Oui		45mn	Oui	Non		Non
2013-10-08 12:12:24	2	161	53	18- 29	Le jour (entre 7H et 20H)	Le matin (7H-12H), En début de soirée (18H-20H)	3 à 6 h	6 à 9 h	1	diagonale des fous 2012, 10e femme, 168e au général	Entre 1 et 2h	22h	Non	4	Non	Non	Non			0	3	0	0	0	Entre 8 et 9	Entre 8 et 9	Entre 8 et 9	Non	Je n'ai pas le temps		Oui		25min	Non	Je n'ai pas le temps		Oui		25min	Oui		25min	Oui		25min	Non	Non		Oui
2013-10-08 12:29:47	1	170	59	40-49	Sans emploi	Cela varie chaque jour	9 à 12 h	12 à 15 h	1	finisher !!!	Entre 1 et 2h	23h	Non	8	Non	Non	Non			0	1	0	0	0	Entre 5 et 6	Entre 5 et 6	Entre 5 et 6	Oui		25 minutes environ	Oui		25 minutes environ	Oui		25 minutes environ	Oui		25 minutes environ	Oui		25 minutes environ	Oui		25 minutes environ	Oui	Non		Oui
2013-10-08 12:34:16	1	174	63	18- 29	Le jour (entre 7H et 20H)	Entre 12H et 14H, En début de soirée (18H-20H)	9 à 12 h	12 à 15 h	1	Infernal trail 2012 33h59 160km 7300m D+	Entre 1 et 2h	22h	Non	2	Non	Non	Non			0	2	1	0	0	Entre 6 et 7	Entre 8 et 9	Entre 7 et 8	Non	Je n'en ressens pas le besoin		Non	Je n'en ressens pas le besoin		Non	Je n'ai pas le temps		Oui		1h	Non	Je n'ai pas le temps		Oui		1h	Non	Non		Oui
2013-10-08 12:58:44	1	191	77	40-49	Le jour (entre 7H et 20H)	Le matin (7H-12H), En début de soirée (18H-20H), Le soir (après 20H)	6 à 9 h	9 à 12 h	1	2009 saintelyon 7h 39- 2010 les templiers 11 h 54- 2011 les templiers 11h09 - 2011 la 6000 D 8h 24 - 2013 la transjutrail 11 h	Entre 2 et 3h	23h	Non	10	Non	Non	Non			0	5	2	0	0	Entre 7 et 8	Entre 8 et 9	Entre 8 et 9	Non	Je n'en ressens pas le besoin		Non	Je n'en ressens pas le besoin		Non	Je n'en ressens pas le besoin		Non	Je n'en ressens pas le besoin		Non	Je n'en ressens pas le besoin		Non	Je n'en ressens pas le besoin		Non			Non
2013-10-08 13:15:51	1	172	62	40-49	Le jour (entre 7H et 20H)	En début de soirée (18H-20H)	3 à 6 h	6 à 9 h	2	4° UTA en 2010 200° Grand Raid Réunion en 2010 7° UTA 2012	Entre 1 et 2h	22h	Oui	5	Non	Oui	Non			0	0	0	0	0	Entre 8 et 9	Entre 8 et 9	Entre 9 et 10	Non	Je n'en ressens pas le besoin	00h30	Non	Je n'en ressens pas le besoin		Oui		00h30	Oui		00h30	Oui		00h45	Oui		00h45	Oui	Non		Oui
2013-10-08 13:19:31	1	182	73	30-39	Le jour (entre 7H et 20H)	Avant 7H, Le matin (7H-12H), En début de soirée (18H-20H)	9 à 12 h	12 à 15 h	2	Saintélyon 2010 90ème , Ecotrail de Paris 2010 50 km 43ème, Ecotrail de Paris 2011 80 km 46ème , Ambazac 2011 65 km 20ème , CCC 2011 53ème , Trail du loup blanc 55 km 2011 4ème, Maxi race Lac d’Annecy 2012 96 km 124ème , Trail des tordus 2012 10ème , TDS 2012 (abandon), Grand raid de la Réunion 2012 177 km 84ème , Eco trail de Paris 30 km 22ème, The trail 80 km en 4xrelais Teamcoachplus 1er , Tra…	Entre 1 et 2h	21h	Non	5	Non	Non	Non			0	0	0	0	0	Entre 7 et 8	Entre 8 et 9	Entre 7 et 8	Oui		20/30 min	Non	aléatoire	15/45 min	Oui		20 min	Oui		15/ 60 min	Oui		20	Oui		1h	Oui	Non		Oui
2013-10-08 13:30:45	2	162	54	30-39	Le jour (entre 7H et 20H)	Le matin (7H-12H), En début de soirée (18H-20H)	6 à 9 h	9 à 12 h	1	je demarre...je me suis essayé au +/- 70km...et viens d'echouer à un 140km avec 10000m D+ cet été (mauvaise gestion alimentaire), à mi parcours. Je pense refaire en 2014	< 1	22h	Non	0	Non	Non	Non			0	0	2	0	0	Entre 7 et 8	Entre 9 et 10	Entre 9 et 10	Non	Je n'ai pas la possibilité matérielle de la faire		Oui		45	Non	Je n'ai pas la possibilité matérielle de la faire		Oui		90minutes	Non	Je n'ai pas la possibilité matérielle de la faire		Oui		45	Oui	Non	cet été. depart à 6h du matin (nuit courte car trajet et tension d'avant course et travaille la veille) abandon à 4h du matin couché à 6h, difficilement reveil à 8h car n'arrive pas à dormir, envie de repartir mais hors barriere horaire!! sinon, course en alpinisme ?!!	Non
2013-10-08 13:57:30	1	183	82	18- 29	Le jour (entre 7H et 20H)	Le matin (7H-12H), En début de soirée (18H-20H), Le soir (après 20H)	3 à 6 h	3 à 6 h	1	trail du Verdon 100km 6200m D+ en 2013 (22h30)	Entre 1 et 2h	22h	Non		Non	Non	Non			0	1	0	0	1	Entre 5 et 6	Entre 7 et 8	Entre 7 et 8	Oui		15 mn	Non	Je n'en ressens pas le besoin		Non	Je n'ai pas le temps		Non	Je n'en ressens pas le besoin		Non	Je n'ai pas le temps		Non	Je n'en ressens pas le besoin		Oui	Non		Non
2013-10-08 13:58:53	2	170	55	50- 59	Le jour (entre 7H et 20H)	Le matin (7H-12H), L'après-midi (14H-18H), En début de soirée (18H-20H)	6 à 9 h	9 à 12 h	2	UTMB 2011 (37H45 - 2eme V2)	Entre 1 et 2h	22h	Non	20	Non	Non	Non			0	0	1	0	0	Entre 7 et 8	Entre 8 et 9	Entre 8 et 9	Non	Je n'en ressens pas le besoin		Non	Je n'en ressens pas le besoin		Oui		15 minutes	Oui		15 minutes	Oui		15 minutes	Oui		15 minutes	Oui	Non		Oui
2013-10-08 14:02:24	2	175	56	40-49	Le jour (entre 7H et 20H)	Avant 7H, Entre 12H et 14H, En début de soirée (18H-20H)	3 à 6 h	3 à 6 h	2	2013 : 16h pour 85Km (UTV) et 13h30 pour 72Km (Vulcain)	Entre 1 et 2h	23h	Non	3	Oui	Oui	Non			0	6	0	0	0	Entre 6 et 7	Entre 7 et 8	Entre 8 et 9	Non	Je n'ai pas la possibilité matérielle de la faire		Non	Peur de ne pas dormir		Non	Je n'ai pas la possibilité matérielle de la faire		Non	Peur de ne pas dormir		Non	Je n'ai pas la possibilité matérielle de la faire		Non	Je n'ai pas le temps		Non	Non		Non
2013-10-08 14:05:47	1	174	77	30-39	Posté	Le matin (7H-12H), L'après-midi (14H-18H), En début de soirée (18H-20H)	3 à 6 h	6 à 9 h	1	36h sur l utmb 2013 18h ccc 2012 21h sur l'ut beaufortain 2011 8h08 sur 100kms de belves 2011 220 kms sur 24h de roche la moliere 2013	Entre 1 et 2h	plus tard que minuit	Non	8	Non	Non	Non			0	1	0	0	0	Entre 6 et 7	Entre 7 et 8	Entre 7 et 8	Oui		30min	Oui		20min	Oui		30min	Oui		20min	Oui		30min	Oui		30 min	Oui	Non		Oui
2013-10-08 14:07:14	1	183	79	40-49	Le jour (entre 7H et 20H)	Avant 7H, Le matin (7H-12H), En début de soirée (18H-20H)	3 à 6 h	9 à 12 h	2	120éme GRP ( 80 KMS ) en 2012 13éme Ultra Lozère Trail 2012 21ème Trail Origole 2012 75éme Vulcain ( 81 KMS) 2013 115ème Echappée Belle 2013	Entre 2 et 3h	22h	Non	2 ans	Non	Non	Non		Lecture	0	2	3	0	0	Entre 6 et 7	Entre 7 et 8	Entre 7 et 8	Non	Je n'ai pas la possibilité matérielle de la faire		Oui		45 minutes	Non	Je n'ai pas la possibilité matérielle de la faire		Oui		45 minutes	Non	Je n'ai pas la possibilité matérielle de la faire		Oui		45 minutes	Oui	Non		Oui
2013-10-08 14:34:44	1	180	79	18- 29	Le jour (entre 7H et 20H)	Le matin (7H-12H), En début de soirée (18H-20H)	9 à 12 h	12 à 15 h	0	5 trail du laka 5 montan aspe 1 delice de l ursuya 1	> 3h	22h	Oui	2	Non	Non	Non			0	1	0	0	0	Entre 7 et 8	Entre 7 et 8	Entre 8 et 9	Oui		30m	Non	Je n'en ressens pas le besoin		Oui		30m	Non	Je n'en ressens pas le besoin		Oui		30m	Oui		1h	Non			Non
2013-10-08 14:34:55	1	180	79	18- 29	Le jour (entre 7H et 20H)	Le matin (7H-12H), En début de soirée (18H-20H)	9 à 12 h	12 à 15 h	0	5 trail du laka 5 montan aspe 1 delice de l ursuya 1	> 3h	22h	Oui	2	Non	Non	Non			0	1	0	0	0	Entre 7 et 8	Entre 7 et 8	Entre 8 et 9	Oui		30m	Non	Je n'en ressens pas le besoin		Oui		30m	Non	Je n'en ressens pas le besoin		Oui		30m	Oui		1h	Non			Non
2013-10-08 14:57:50	1	171	64	40-49	Le jour (entre 7H et 20H)	Entre 12H et 14H, Le soir (après 20H), Cela varie chaque jour	6 à 9 h	Plus de 15 h	1	139eme sur la CCC en 2013	Entre 2 et 3h	23h	Non	4 ans	Oui	Oui	Non			0	0	1 a 2 litres	0	0	Entre 7 et 8	Entre 8 et 9	Entre 9 et 10	Non	Je n'ai pas la possibilité matérielle de la faire		Non	Je n'aime pas faire la sieste car le soir j'ai du mal à dormir		Non	Même chose		Non	Même chose		Non	Même chose		Non	Même chose		Non			Non
2013-10-08 14:59:29	1	183	85	50- 59	Le jour (entre 7H et 20H)	Avant 7H, En début de soirée (18H-20H)	3 à 6 h	12 à 15 h	2	2013 TDG 97 ém 1993 à 1999 1er sur le Grand duc en chartreuse	Entre 1 et 2h	21h	Non	3	Non	Non	Non			0	3	1	0	0	Entre 6 et 7	Entre 6 et 7	Entre 7 et 8	Non	Je n'en ressens pas le besoin		Non	Je n'en ressens pas le besoin		Non	Je n'en ressens pas le besoin		Non	Je n'en ressens pas le besoin		Oui		30mn	Non		30mn	Oui	Non		Oui
2013-10-08 15:12:09	2	173	57	50- 59	Le jour (entre 7H et 20H)	En début de soirée (18H-20H)	6 à 9 h	9 à 12 h	3	3éme V2 UTMB en 2007, 3éme V2 DIAGONALE DES FOUS en 2009, 1ère V2 TGV 2009, 1ère V2 AIGUILLES ROUGES 2002	Entre 2 et 3h	23h	Non	12	Non	Non	Non			0	1	0	1	0	Entre 6 et 7	Entre 6 et 7	Entre 6 et 7	Non	Je n'ai pas le temps		Non	Je n'en ressens pas le besoin		Non	Je n'en ressens pas le besoin		Non	Je n'en ressens pas le besoin		Non	Je n'en ressens pas le besoin		Non	Je n'en ressens pas le besoin		Oui	Non		Oui
2013-10-08 15:14:52	1	177	72	40-49	Le jour (entre 7H et 20H)	Le matin (7H-12H), En début de soirée (18H-20H)	6 à 9 h	12 à 15 h	2	UTCO 2012 Montagn'hard 2013	Entre 1 et 2h	22h	Non	4	Non	Oui	Non			0	2017-05-04	1	0	1	Entre 7 et 8	Entre 7 et 8	Entre 7 et 8	Non	Je n'en ressens pas le besoin		Non	Je n'en ressens pas le besoin		Non	Je n'en ressens pas le besoin		Non	Je n'en ressens pas le besoin		Non	Je n'ai pas le temps		Oui		40' plutôt le W.End	Oui	Non		Non
2013-10-08 15:15:45	1	178	76	40-49	Le jour (entre 7H et 20H)	L'après-midi (14H-18H)	Moins de 3 h	6 à 9 h	1	428 utmb 2006	Entre 2 et 3h	plus tard que minuit	Non	5	Non	Non	Non			0	2	1	0	2017-02-01	Entre 5 et 6	Entre 7 et 8	Entre 7 et 8	Non	Je n'ai pas le temps		Non	Je n'ai pas le temps		Non	Je n'ai pas le temps		Non	Je n'ai pas le temps		Non	Je n'ai pas le temps		Non			Non	Non		Oui
2013-10-08 15:39:09	1	178	81	50- 59	Le jour (entre 7H et 20H)	En début de soirée (18H-20H), Le soir (après 20H)	3 à 6 h	6 à 9 h	2	GRR 2008 finisher GRP 2011 finisher UTMB 2010 finisher abandon cause sommeil GRP 2010 et UTMB 2009	Entre 1 et 2h	23h	Non	8	Non	Non	Non			0	4	0	0	1	Entre 6 et 7	Entre 6 et 7	Entre 7 et 8	Non	Je n'ai pas le temps		Non	Je n'en ressens pas le besoin		Non	Je n'ai pas le temps		Non	Je n'en ressens pas le besoin		Non	Je n'ai pas le temps		Oui		2017-02-01	Oui	Non		Oui
2013-10-08 23:32:00	1	187	89	50- 59	Le jour (entre 7H et 20H)	Entre 12H et 14H, Le soir (après 20H)	3 à 6 h	6 à 9 h	2	42h sur le GRP, 43h sur le GRR, 42h sur l'UTMB...	< 1	23h	Non	2	Non	Non	Non			0	3	1	0	0	Entre 5 et 6	Entre 7 et 8	Entre 7 et 8	Oui		10mn	Oui		10mn	Oui		10mn	Non	Je n'en ressens pas le besoin		Oui		10mn	Oui		10mn	Oui	Oui	20mn sur le grr (42h), 10mn sur le GRP (42h), 10mn sur l'UTMB (42h)	Oui
2013-10-08 23:40:58	2	154	48	40-49	Le jour (entre 7H et 20H)	Le matin (7H-12H), Entre 12H et 14H	3 à 6 h	9 à 12 h	3	2ème féminine au scratch 2013 aravis Finisher échappée belle 13 en duo 2013 5 eme UTV 2012	Entre 1 et 2h	22h	Oui	8 ans	Non	Non	Non			0	4 tasses	1 tasse	0	0	Entre 6 et 7	Entre 7 et 8	Entre 8 et 9	Non	Je n'en ressens pas le besoin		Non	Je n'en ressens pas le besoin		Non	Je n'en ressens pas le besoin		Non	Je n'en ressens pas le besoin		Non	Je n'en ressens pas le besoin		Non	Je n'en ressens pas le besoin		Oui	Non		Oui
2013-10-08 23:41:39	1	177	81	40-49	Le jour (entre 7H et 20H)	L'après-midi (14H-18H)	3 à 6 h	6 à 9 h	1	Utmb 2006, 122 eme Réunion 2001 , 74 eme Templiers 2004, 27 eme	< 1	22h	Non	20 ans	Non	Non	Non			0	3	0	0	1	Entre 7 et 8	Entre 7 et 8	Entre 8 et 9	Non	Je n'en ressens pas le besoin		Oui		45mn a 1h30	Non	Je n'ai pas la possibilité matérielle de la faire		Non	Je n'en ressens pas le besoin		Non	Je n'ai pas le temps		Non	Je n'ai pas le temps		Oui	Non		Oui
2013-10-09 01:03:07	1	176	67	40-49	Le jour (entre 7H et 20H)	Le matin (7H-12H)	6 à 9 h	12 à 15 h	2	6 au 240 du grp	< 1	21h	Non	3	Non	Non	Non			4	3	0	1	1	Entre 7 et 8	Entre 7 et 8	Entre 7 et 8	Non	Je n'ai pas la possibilité matérielle de la faire		Oui		30 minutes	Non	Je n'ai pas la possibilité matérielle de la faire		Oui		30 minutes	Non	Je n'ai pas la possibilité matérielle de la faire		Oui		30 minutes	Oui	Oui	2 fois 2 heures pour 85h de course....j'étais sec a la fin...	Oui
2013-10-09 01:52:02	1	172	67	40-49	Le jour (entre 7H et 20H)	Cela varie chaque jour	9 à 12 h	12 à 15 h	0	Saintélyon 2012 : 8h50	Entre 2 et 3h	21h	Oui	4	Non	Non	Non			0	4	0	0	0	Entre 7 et 8	Entre 7 et 8	Entre 7 et 8	Non	Je n'ai pas le temps		Non	Je n'ai pas le temps		Non	Je n'ai pas le temps		Non	Je n'ai pas le temps		Non	Je n'ai pas le temps		Non	Je n'ai pas le temps		Oui	Non		Non
2013-10-09 02:32:40	1	172	63	40-49	Le jour (entre 7H et 20H)	Le matin (7H-12H)	6 à 9 h	9 à 12 h	1	Diagonale des Fous 46 heures 2004 Ecotrail de Paris 9 heures 2010 Aubrac Ultra trail 15 heures 2011 Ardéchois Ultra 15 heures 2012 UTMB 44 heures 2013	Entre 1 et 2h	23h	Non	5	Non	Non	Non			0	2	0	0	1	Entre 7 et 8	Entre 8 et 9	Entre 8 et 9	Non	Je n'en ressens pas le besoin		Non	Je n'en ressens pas le besoin		Non	Je n'en ressens pas le besoin		Non	Je n'en ressens pas le besoin		Non	Je n'ai pas le temps		Non	Je n'ai pas le temps		Non	Oui		Oui
2013-10-09 03:25:15	1	184	71	30-39	Le jour (entre 7H et 20H)	Le matin (7H-12H), Entre 12H et 14H, En début de soirée (18H-20H)	6 à 9 h	9 à 12 h	2	5eme UT4M 2013 5eme Ultra Montée du Salève 2013 qq places dans les 20-30	< 1	21h	Non	2004	Non	Oui	Non		je me concentre sur la respiration, exercices de remobilisation et concentration expliqué dans le livre "ultra trail"	0	0	0	0	0	Entre 7 et 8	Entre 8 et 9	Entre 9 et 10	Non	Je n'ai pas la possibilité matérielle de la faire		Oui		20 mn mais non systématique	Non	Je n'ai pas la possibilité matérielle de la faire		Oui		20 mn mais non systématique	Non	Je n'ai pas la possibilité matérielle de la faire		Oui		20 mn	Oui	Oui	3 tentatives infructueuses de micro-sommeil de 2 mn le long du chemin. 1 * 10mn (alors que le reveil était calé sur 15 mn) dans l'herbe, le long du chemin. Temps de course: 31h. Départ 5h00	Non
2013-10-09 03:37:35	1	188	82	30-39	Le jour (entre 7H et 20H)	Le matin (7H-12H), L'après-midi (14H-18H)	9 à 12 h	12 à 15 h	2	Abandon au Km110 du Grand Trail du Nord en 2012 sur tendinite genou. Abandon au Km55 de l'Ardennes Méga Trail en 2013 sur douleurs cuisses.	Entre 2 et 3h	22h	Non	2006	Non	Non	Non			0	1	1	0	1	Entre 5 et 6	Entre 7 et 8	Entre 7 et 8	Oui		20 minutes	Oui		1 heure	Oui		20 minutes	Oui		1 heure	Oui		20 minutes	Oui		1 heure	Oui	Non		Non
2013-10-09 05:31:22	1	180	65	40-49	Le jour (entre 7H et 20H)	L'après-midi (14H-18H)	3 à 6 h	3 à 6 h	1	UTPMA 2013 un peu plus de 20h00	< 1	21h	Non	1	Non	Non	Non			0	3	2	0	0	Entre 7 et 8	Entre 8 et 9	Entre 8 et 9	Non	Je n'ai pas la possibilité matérielle de la faire		Non	Je n'ai pas le temps		Non	Je n'ai pas la possibilité matérielle de la faire		Non	Je n'ai pas le temps		Non	Je n'ai pas la possibilité matérielle de la faire		Oui		30mn	Non			Non
2013-10-09 05:51:28	1	172	83	30-39	Le jour (entre 7H et 20H)	Avant 7H, Le matin (7H-12H), En début de soirée (18H-20H), Le soir (après 20H)	3 à 6 h	9 à 12 h	2	Eco-trail de paris 2011 dernier tiers UTTJ 2012 dernier tiers Grand raid de la réunion 2012 dernier tiers UTTJ 2013 dernier tiers	Entre 1 et 2h	23h	Oui	1	Non	Non	Non			0	2	0	0	0	Entre 5 et 6	Entre 6 et 7	Entre 7 et 8	Non	Je n'ai pas le temps		Non	Je n'ai pas le temps		Oui		1h	Non	Je n'ai pas le temps		Non	Je n'ai pas le temps		Oui		1h30	Oui	Oui	UTTJ 2012 21h de course, 5h de sommeil en dortoir UTTJ 2013 24h de course, 6h de sommeil en dortoir	Non
2013-10-09 07:02:57	2	167	57	30-39	Le jour (entre 7H et 20H)	Le matin (7H-12H), L'après-midi (14H-18H)	3 à 6 h	6 à 9 h	0	0	Entre 1 et 2h	22h	Non	5	Non	Non	Non			0	0	2	0	0	Entre 6 et 7	Entre 7 et 8	Entre 7 et 8	Oui		1 heure	Oui		1 heure	Oui		1 heure	Non	Je n'en ressens pas le besoin		Oui		2 heures	Oui		2 heures	Non			Non
2013-10-09 07:49:51	1	177	74	40-49	Le jour (entre 7H et 20H)	Cela varie chaque jour	9 à 12 h	Plus de 15 h	3	2013: 105 UTPMA 18h48	> 3h	21h	Non	5	Non	Non	Non			0	5	1	1	0	Entre 7 et 8	Entre 8 et 9	Entre 8 et 9	Non	Je n'en ressens pas le besoin		Non	Je n'en ressens pas le besoin		Non	Je n'en ressens pas le besoin		Non	Je n'en ressens pas le besoin		Oui		20	Oui		20	Oui	Non		Non
2013-10-09 11:32:00	1	171	65	40-49	Le jour (entre 7H et 20H)	Avant 7H, Entre 12H et 14H, En début de soirée (18H-20H)	3 à 6 h	6 à 9 h	1	9eme UTCO en 2012 263eme TDS en 2012 290eme CCC en 2011	Entre 2 et 3h	23h	Non	13	Non	Non	Non			0	1	2	0	0	Entre 7 et 8	Entre 8 et 9	Entre 8 et 9	Non	Je n'en ressens pas le besoin		Non	Je n'en ressens pas le besoin		Non	Je n'en ressens pas le besoin		Non	Je n'en ressens pas le besoin		Non	Je n'en ressens pas le besoin		Non	Je n'en ressens pas le besoin		Oui	Non		Non
2013-10-09 11:46:21	1	174	73	18- 29	Le jour (entre 7H et 20H)	En début de soirée (18H-20H)	6 à 9 h	9 à 12 h	0	Nuit des Cabornes 7h30. 50 km 2500 D+	Entre 1 et 2h	22h	Non	3	Oui	Oui	Oui	Pas de médicament mais machine à pression positive continue (PPC) pour traitement d'apnées du sommeil.		0	2	4	0	0	Entre 7 et 8	Entre 8 et 9	Entre 8 et 9	Non	Je n'ai pas le temps		Non	Je n'ai pas le temps		Non	Je n'ai pas le temps		Non	Je n'ai pas le temps		Non	Je n'ai pas le temps		Non	Je n'ai pas le temps		Non			Non
2013-10-09 12:25:15	1	189	78	18- 29	Le jour (entre 7H et 20H)	En début de soirée (18H-20H)	6 à 9 h	12 à 15 h	1	2013 premiere place échappée belle relais 2	> 3h	22h	Non	3	Non	Non	Non			0	0	0	0	0,5	Entre 8 et 9	Entre 8 et 9	Entre 8 et 9	Non	Je n'en ressens pas le besoin		Non	Je n'en ressens pas le besoin		Non	Je n'en ressens pas le besoin		Non	Je n'en ressens pas le besoin		Non	Je n'en ressens pas le besoin		Oui		1h	Oui	Non		Oui
2013-10-09 12:43:54	1	189	77	40-49	Le jour (entre 7H et 20H)	Avant 7H	6 à 9 h	Plus de 15 h	1	Aucun ; à voir dans quelques jour lors de la Diagonale des Fous où j'espère tout d'abord finir et si oui avec comme objectif 40 heures.	< 1	21h	Non	5	Non	Non	Non			0	0	0	0	0	Entre 7 et 8	Entre 7 et 8	Entre 7 et 8	Non	Je n'en ressens pas le besoin		Oui		1 heure	Oui		20 minutes	Oui		1 heure	Oui		20 minutes	Oui		1 heure	Non			Non
2013-10-09 12:57:12	1	170	70	30-39	Le jour (entre 7H et 20H)	Le matin (7H-12H), Entre 12H et 14H, L'après-midi (14H-18H)	3 à 6 h	6 à 9 h	2	2013 utmb 34h 2012 andorra mitic 30h30	> 3h	23h	Non	9	Non	Non	Non			0	3	0	0	1	Entre 5 et 6	Entre 7 et 8	Entre 7 et 8	Non	Je n'en ressens pas le besoin		Non	Je n'en ressens pas le besoin		Non	Je n'en ressens pas le besoin		Non	Je n'en ressens pas le besoin		Non	Je n'en ressens pas le besoin		Non	Je n'en ressens pas le besoin		Oui	Non		Oui
2013-10-09 13:04:27	1	185	74	30-39	Le jour (entre 7H et 20H)	Entre 12H et 14H, L'après-midi (14H-18H)	6 à 9 h	9 à 12 h	1	Endurance Trail 2012 - 77e TDS 2013 - 166e	Entre 1 et 2h	23h	Non	4	Non	Non	Non			0	1	3	0	0	Entre 7 et 8	Entre 8 et 9	Entre 8 et 9	Non	Je n'en ressens pas le besoin		Oui		20 min	Non	Je n'ai pas la possibilité matérielle de la faire		Oui		20 min	Non	Je n'ai pas la possibilité matérielle de la faire		Oui		20 min	Oui	Oui	midi 20 min milieu de nuit 15min	Non
2013-10-09 13:12:22	1	187	83.3	40-49	Le jour (entre 7H et 20H)	Entre 12H et 14H, L'après-midi (14H-18H), En début de soirée (18H-20H)	3 à 6 h	6 à 9 h	1	CCC2010 TEMPLIERS 2006 2007 RAID DU GOLFE 2009 SEMI RAID DU GOLFE 2008 2011 2013	< 1	22h	Non	12	Non	Non	Non			0	0	5	0	0	Entre 8 et 9	Entre 8 et 9	Entre 8 et 9	Oui		20MN	Oui		1H	Non	Je n'ai pas le temps		Oui		1H	Non	Je n'ai pas le temps		Oui		1H	Oui	Non		Oui
2013-10-09 13:49:49	1	170	57	40-49	Le jour (entre 7H et 20H)	Avant 7H, Le matin (7H-12H), L'après-midi (14H-18H)	3 à 6 h	6 à 9 h	1	ccc 2013	Entre 1 et 2h	23h	Non	3	Non	Non	Non		radio ou lecture	0	0	2	0	2	Entre 7 et 8	Entre 8 et 9	Entre 8 et 9	Non	Je n'ai pas la possibilité matérielle de la faire		Oui		20min	Non	Je n'ai pas la possibilité matérielle de la faire		Oui		30-45min	Non	Je n'ai pas la possibilité matérielle de la faire		Oui		45min	Oui	Non		Non
2013-10-09 14:08:56	1	182	79	30-39	Le jour (entre 7H et 20H)	Cela varie chaque jour	Plus de 15 h	Plus de 15 h	1	Tor des Géants en 117h	Entre 2 et 3h	23h	Non	10	Non	Non	Non			0	12	0	0	0	Entre 6 et 7	Entre 6 et 7	Entre 6 et 7	Non	Je n'ai pas le temps		Non	Je n'ai pas le temps		Non	Je n'ai pas le temps		Non	Je n'ai pas le temps		Non	Je n'ai pas le temps		Non	Je n'ai pas le temps		Oui	Non		Oui
2013-10-09 14:26:15	1	181	73	40-49	Posté	Cela varie chaque jour	6 à 9 h	9 à 12 h	1	2011 : Infernal Trail des Vosges 160 km : 27è sur 59 arrivants (150 partants) en 35h30	Entre 1 et 2h	22h	Non	6	Non	Non	Non			0	1	1	0	0	Entre 5 et 6	Entre 8 et 9	Entre 8 et 9	Non	Je n'ai pas le temps		Non	enfants à s'occuper		Non	Je n'ai pas le temps		Non	enfants		Non	Je n'ai pas le temps		Non	enfants		Oui	Non		Oui
2013-10-09 15:07:56	1	176	62	50- 59	Le jour (entre 7H et 20H)	Le matin (7H-12H), L'après-midi (14H-18H)	9 à 12 h	12 à 15 h	2	TOUR DES GEANTS 87 EN 2013 UTMB 277 EN 2012 310 EN 2009 164 EN 2008 DENTELLES DU VENTOUX 9 EN 2012 TEMPLIERS 38 EN 2010 VERDON CANYON 10 EN 2010	Entre 1 et 2h	22h	Non	15	Non	Non	Non			0	3	4	4	0	Entre 5 et 6	Entre 5 et 6	Entre 5 et 6	Non	Je n'en ressens pas le besoin		Non	Je n'en ressens pas le besoin		Non	Je n'en ressens pas le besoin		Non			Non	Je n'en ressens pas le besoin		Oui		1	Oui	Non		Non
2013-10-10 01:54:22	2	172	65	18- 29	Le jour (entre 7H et 20H)	L'après-midi (14H-18H), En début de soirée (18H-20H)	3 à 6 h	9 à 12 h	0	aucun	< 1	22h	Oui	5	Oui	Oui	Non			0	2	0	0	0	Entre 7 et 8	Entre 7 et 8	Entre 7 et 8	Non	Je n'en ressens pas le besoin		Non	Je n'en ressens pas le besoin		Non	Je n'en ressens pas le besoin		Non	Je n'en ressens pas le besoin		Non	Je n'ai pas le temps		Non	Je n'ai pas le temps		Non			Non
2013-10-10 01:56:23	1	172	64	40-49	Sans emploi	Le matin (7H-12H), Entre 12H et 14H, L'après-midi (14H-18H), En début de soirée (18H-20H), Cela varie chaque jour	6 à 9 h	6 à 9 h	4	Grand raid occitan (150 km, 2012) : 32h. Eco-Trail de Paris (83 km, 2011) : 8h38'. Origole (73 km, 2010) : 10h07'.	Entre 1 et 2h	23h	Non	>6	Non	Non	Non			0	0	1	0	0	Entre 7 et 8	Entre 8 et 9	Entre 8 et 9	Non	Je n'en ressens pas le besoin		Non	Je n'en ressens pas le besoin		Non	Je n'en ressens pas le besoin		Non	Je n'en ressens pas le besoin		Non	Je n'ai pas la possibilité matérielle de la faire		Non	du mal à redécoller ensuite		Oui	Non		Non
2013-10-10 02:08:19	1	174	66	40-49	Sans emploi	Cela varie chaque jour	9 à 12 h	Plus de 15 h	3	UT4M 2013 23è	> 3h	Minuit	Non	2	Non	Non	Non			0	0	0	0	0	Entre 6 et 7	Entre 5 et 6	Entre 7 et 8	Oui	Je n'en ressens pas le besoin		Non	Je n'en ressens pas le besoin		Non	Je n'en ressens pas le besoin		Non	Je n'en ressens pas le besoin		Non	Je n'ai pas le temps		Non	Je n'ai pas le temps		Oui	Non		Non
2013-10-10 03:07:04	1	180	74	40-49	Le jour (entre 7H et 20H)	Le matin (7H-12H), L'après-midi (14H-18H), Cela varie chaque jour	3 à 6 h	12 à 15 h	2	2008 140 km 31h	< 1	22h	Non	9	Non	Non	Non			0	1	1	0	0	Entre 8 et 9	Entre 8 et 9	Entre 8 et 9	Oui	Je n'en ressens pas le besoin	15min	Non	Je n'en ressens pas le besoin		Oui		15min	Non	Je n'en ressens pas le besoin		Oui		15min	Non	Je n'en ressens pas le besoin		Oui	Oui	2 à 3 fois 10 à 15 min sur 40 h	Oui
2013-10-10 03:51:48	1	170	72	40-49	Le jour (entre 7H et 20H)	Avant 7H, Le matin (7H-12H), En début de soirée (18H-20H)	6 à 9 h	9 à 12 h	1	177 ULTRA MARIN DU GOLF DU MORBIHAN 31HEURES30 2 FOIS UTMB RACCOURCI 2010 ET 2012 UT4M MAIS ABANDON AU 88 CAUSE SOMMEIL 2013 LES HOSPITALIERS 2011	Entre 2 et 3h	23h	Oui	3	Non	Non	Non			0	5	0	0	1	Entre 6 et 7	Entre 7 et 8	Entre 8 et 9	Oui		10mn	Non	Je n'en ressens pas le besoin		Oui		10mn	Non	Je n'en ressens pas le besoin		Oui		10mn	Non			Oui	Oui	30mn sur ultra du golf du morbihand 31h30 dans un chemin car je fuis le confort 15mn utmb 2012 raccouci	Non
2014-01-19 03:42:40	2	173	68	30-39	Le jour (entre 7H et 20H)	Cela varie chaque jour	6 à 9 h	12 à 15 h	1	2013 finisher en 43 h de l Utrail Trail des 4 Massifs	< 1	21h	Non	1	Non	Non	Non			0	0	2	0	0	Entre 8 et 9	Entre 8 et 9	Entre 8 et 9	Oui		15	Non	Je n'en ressens pas le besoin		Oui		15	Oui		15	Oui		15	Oui		15	Oui	Oui	Fermer les yeux 2 fois 4 minutes au base vie avec la peur de ne pas me réveiller et de prendre trop de temps par rapport a la barrière horaire TPS de Course 43 h (départ 5h du mat´ arrivée le nuit du lendemain)	Non
2014-01-20 11:52:35	1	177	70	40-49	Le jour (entre 7H et 20H)	En début de soirée (18H-20H)	3 à 6 h	6 à 9 h	2	2010 grand raid reunion 56h00 2102 grand raid pyrenees 43h00 2013 raid golfe morbihan 30h00	< 1	21h	Non	2011	Non	Non	Non		lecture avant de m endormir j adore ça !	0	2	2	0	0	Entre 9 et 10	> 10	> 10	Non	Je n'ai pas la possibilité matérielle de la faire		Oui		1h00	Non	Je n'ai pas la possibilité matérielle de la faire		Oui		1hoo	Non			Oui		1h00	Oui	Oui	dormi 20 minutes a un gros poste de ravitaillement sur lit picot. aux 3/4 de la course qui avait durée 30h00	Oui
2014-01-22 07:01:21	1	173	69	40-49	Posté	Cela varie chaque jour	3 à 6 h	3 à 6 h	2	-2011: Trail tour du canton 82.00 km 13h 03' 00" -2012: La barjo 88.91 km 12h 39' 04" -2013: Saintélyon 76.00 km 12h 04' 29"	Entre 2 et 3h	23h	Non	2	Non	Non	Non			0	2	1	0	0	Entre 6 et 7	Entre 8 et 9	Entre 7 et 8	Non	Je n'en ressens pas le besoin		Non	Je n'en ressens pas le besoin		Non	Je n'en ressens pas le besoin		Non	Je n'en ressens pas le besoin		Non	Je n'en ressens pas le besoin		Non	Je n'en ressens pas le besoin		Oui	Non		Non
2014-02-02 14:55:29	2	169	60	30-39	Le jour (entre 7H et 20H)	Avant 7H, Le matin (7H-12H), Le soir (après 20H)	6 à 9 h	9 à 12 h	5 et +	j'ai pas fait de répétitions pour le moment mais voici quelques résultats: https://www.runedia.com/runbook.php?urlrunner=harriet-kjaer	Entre 1 et 2h	23h	Non	moins de 1	Non	Non	Non		lire	0	2017-03-01	0	0	0	Entre 6 et 7	Entre 7 et 8	Entre 6 et 7	Non	Je n'ai pas le temps		Oui		1h	Non	Je n'ai pas le temps		Oui		1-2h	Non	Je n'ai pas le temps		Oui		1-2h	Oui	Non		Non
2014-01-24 08:30:08	1	174	67	40-49	Posté	Le matin (7H-12H), En début de soirée (18H-20H)	3 à 6 h	6 à 9 h	0	SaintéLyon 2012 8h43 70 km	Entre 1 et 2h	23h	Non	8	Non	Non	Non			0	4	1	0	0	Entre 6 et 7	Entre 8 et 9	Entre 9 et 10	Non	Je n'ai pas le temps		Non	Je n'en ressens pas le besoin		Non	Je n'ai pas le temps		Oui		30 min	Non	Je n'ai pas le temps		Oui		1h	Non			Non
2014-02-03 06:06:31	1	189	90	40-49	Le jour (entre 7H et 20H)	Le matin (7H-12H), Entre 12H et 14H, Le soir (après 20H)	3 à 6 h	6 à 9 h	4	Les Sentes de Légendes 101 km Trail (BEL) 14h09 en 2009 La Piste des Sangliers 111 km Trail (BEL) 18h37 en 2010 UTMB raccourci 2010 en 22h29 Le tour du Chalet 108km Trail (BEL) 18h20 en 2011 TDS 2011 120km en 31h40 La Moulinette Céleste 108km Trail (BEL) 21h27 en 2012 La balade du Bandit d'Honneur 105km Trail (BEL) 17h16 en 2013 Grand Trail des Lacs et Châteaux 84 km (BEL) 13h04 2013	Entre 1 et 2h	22h	Non	15	Non	Non	Non			0	2	0	1	0.3	Entre 6 et 7	Entre 7 et 8	Entre 7 et 8	Non	Je n'ai pas le temps		Non	Je n'ai pas le temps		Non	Je n'ai pas la possibilité matérielle de la faire		Non	Je n'en ressens pas le besoin		Non	Je n'ai pas la possibilité matérielle de la faire		Non	Je n'en ressens pas le besoin		Oui	Non		Non
2014-02-03 14:54:21	1	175	72	40-49	Le jour (entre 7H et 20H)	Entre 12H et 14H	3 à 6 h	6 à 9 h	1	15h45 - Grand Raid des Pyrénées 80km 2012 (1er Ultra) 39h00 - Grand Raid des Pyrénées 160km 2013	Entre 1 et 2h	22h	Non	5	Non	Non	Non			0	2	1	0	1	Entre 6 et 7	Entre 7 et 8	Entre 8 et 9	Non	Je n'ai pas le temps		Oui		1h	Non	Je n'ai pas le temps		Oui		1	Non	Je n'ai pas le temps		Oui		1	Oui	Oui	Vers 4h du matin, j'ai ressenti une intense fatigue. J'ai un peu stressé, puis je me suis dis que la solution était très simple : dormir. J'ai donc cherché un endroit pour dormir (maison abandonnée) Vu mon inexpérience (1er ultra avec une nuit de course) je me suis dis sois tu es cuit et là... sois tu es dans "l'aventure" et donc tu vas te réveiller rapidement, donc j'ai décidé de ne pas mettre d…	Non
2014-02-05 07:37:02	1	168	60	30-39	Le jour (entre 7H et 20H)	Entre 12H et 14H, En début de soirée (18H-20H), Le soir (après 20H)	6 à 9 h	9 à 12 h	3	finisher diagonale des fous 2012 (170km) en 61h26 finisher grp 2013 (160km) en 41h36	Entre 2 et 3h	23h	Non	12	Non	Non	Non			0	6	1	0	2	Entre 6 et 7	Entre 7 et 8	Entre 7 et 8	Non	Je n'en ressens pas le besoin		Non	Je n'en ressens pas le besoin		Non	Je n'en ressens pas le besoin		Non	Je n'en ressens pas le besoin		Oui		30m à 1h	Non	Je n'en ressens pas le besoin		Oui	Non		Oui
2014-02-06 13:07:22	1	172	65.5	> 60	Sans emploi	Cela varie chaque jour	3 à 6 h	6 à 9 h	1	50heures à La Diagonale 1999 12h30 100kms Millau 2006 16h à l'Ultra de l'Aubrac 17h30 à Mont Dore-Sancy 149kms au 24h de Portet/Garonne 2011 24h Téléthon 2013 Foulayronnes 127kms	Entre 2 et 3h	23h	Non	1995 ??	Non	Non	Non		Je n'ai vraiment pas besoin d'une quelconque méthode pour dormir	Jamais fumé	4 à 5	<1	Rarement	0	Entre 7 et 8	Entre 8 et 9	Entre 8 et 9	Non	Je n'en ressens pas le besoin		Non	Je n'en ressens pas le besoin		Non	Je n'en ressens pas le besoin		Non	Je n'en ressens pas le besoin		Non	Je n'en ressens pas le besoin		Non	Je n'en ressens pas le besoin		Oui	Non		Oui
2014-02-11 13:50:57	1	183	71	50- 59	Le jour (entre 7H et 20H)	Le matin (7H-12H), Entre 12H et 14H, En début de soirée (18H-20H)	6 à 9 h	9 à 12 h	2	Ultra marin 2012 158ème Endurance trail 2010 182ème	Entre 2 et 3h	23h	Non	15	Oui	Oui	Non			0	5	0	0	1	Entre 6 et 7	Entre 7 et 8	Entre 7 et 8	Non	Je n'ai pas le temps		Oui		30 à 45 mn	Non	Je n'ai pas le temps		Oui		30-45 mn	Non	Je n'ai pas le temps		Oui		30-45 mn	Oui	Oui	Par terre après fatigue intense et subite	Non
2014-05-16 01:59:31	1	169	70	18- 29	Le jour (entre 7H et 20H)	Entre 12H et 14H, En début de soirée (18H-20H), Le soir (après 20H)	3 à 6 h	3 à 6 h	0	Gap'en cimes 2013 : 400éme (mais fini! victoire!) Lyon urban trail 2014	< 1	je ne regarde jamais d'écran	Non	2	Non	Non	Non		diminution de la fréquence respiratoire ou sinon je fermes les yeux.	1	1	1	0	1	Entre 7 et 8	Entre 8 et 9	Entre 8 et 9	Non	Je n'ai pas la possibilité matérielle de la faire	15min	Oui		1h	Non	Je n'ai pas la possibilité matérielle de la faire		Oui		1h	Non	Je n'ai pas la possibilité matérielle de la faire		Oui		1h	Non			Non
2015-07-13 10:54:08	1	178	79	40-49	Le jour (entre 7H et 20H)	Le matin (7H-12H), En début de soirée (18H-20H), Le soir (après 20H), Cela varie chaque jour	3 à 6 h	12 à 15 h	2	ecotrail 2012 - 12h30 24h solo (piste) 2013 - 136kms 24h solo (grand brassac) - 103 kms mds 2015 - 39h45	Entre 1 et 2h	22h	Oui	5	Non	Non	Non			0	12	0	0	2	Entre 6 et 7	> 10	Entre 7 et 8	Non	Je n'ai pas la possibilité matérielle de la faire		Oui		1h	Non	Je n'ai pas la possibilité matérielle de la faire		Oui		1	Non	Je n'ai pas la possibilité matérielle de la faire		Oui		2	Oui	Oui	bivouac 1h (130kms), voiture 1h30 (103kms), sur une chaise par 15'/20'sur 100kms...	Non
2013-10-24 10:00:30	1	178	73	50- 59	Diurno (tra le 7:00 e le 20:00)	Prima delle 7:00, Pomeriggio (tra le 14:00 et le 18:00)	da 3 a 6 ore	da 6 a 9 ore	1	20th TDG 2010	Meno di un’ora	non sto mai davanti ad uno schermo	No	8	No	Si	No			0	0	0	0	0	Tra le 5 e le 6 ore	Tra le 5 e le 6 ore	Tra le 7 e le 8 ore	No	Non ho tempo		No	Non ho tempo		No	Non ho tempo		No	Non ho tempo		No	Non ho tempo		No	Non ho tempo		Si	No		Si
2013-11-12 07:18:31	1	188	79	40-49	Diurno (tra le 7:00 e le 20:00)	Pomeriggio (tra le 14:00 et le 18:00), Prima serata (tra le 18:00 et le 20:00)	da 9 a 12 ore	da 3 a 6 ore	1	CCC del 2011 in 15h34'37"	Tra 1 e 2 ore	23:00:00	Si	12	No	No	No			0	1	1	0,5	2	Tra le 7 e le 8 ore	Tra le 7 e le 8 ore	Tra le 7 e le 8 ore	No	Non ne sento il bisogno		Si		1/2 ora - 1 ora	No	Non ne sento il bisogno		No	Non ne sento il bisogno		No	Non ne sento il bisogno		Si		1/2 ora - 1 ora	No			No
2013-11-12 07:26:57	1	172	62	40-49	Diurno (tra le 7:00 e le 20:00)	Tra le 12:00 e le 14:00	da 6 a 9 ore	da 9 a 12 ore	1	Gran Trail Valdigne 2007 - 6th place 12h24'	Meno di un’ora	22:00:00	No	16	No	No	No			0	2	1	0	1	Tra le 7 e le 8 ore	Tra le 7 e le 8 ore	Tra le 6 e le 7 ore	No	Non ne sento il bisogno		No	Non ne sento il bisogno		No	Non ne sento il bisogno		No	Non ne sento il bisogno		No	Non ho tempo		No	Non ne sento il bisogno		Si	No		Si
2013-11-12 07:36:58	2	173	72	40-49	Diurno (tra le 7:00 e le 20:00)	Prima serata (tra le 18:00 et le 20:00), La sera (dopo 20:00)	da 12 a 15 ore	Più di 15 ore	5 e più	2009	Tra 1 e 2 ore	non sto mai davanti ad uno schermo	No	3	No	No	No			0	2	1	0	1	Tra le 5 e le 6 ore	Tra le 5 e le 6 ore	Tra le 6 e le 7 ore	No	Non posso farla (assenza di condizioni che me lo permettano)		Si		1 ora	No	Non posso farla (assenza di condizioni che me lo permettano)		No	Non ne sento il bisogno		No	Non ho tempo		Si		1 ora	Si	No		Si
2013-11-12 07:57:08	2	170	62	30-39	Diurno (tra le 7:00 e le 20:00)	Varia di giorno in giorno	Più di 15 ore	Più di 15 ore	5 e più	TOR DES GEANTS 2012 127 ORE	Tra 1 e 2 ore	23:00:00	No	8	No	No	No			0	10	0	0	0	Meno di 5 ore	Meno di 5 ore	Meno di 5 ore	Si		15 minutu	Si		15 minuti	No	Non ho tempo		Si			No	Non ho tempo		Si		15 min	Si	Si	microsonni max 10-15 min	Si
2013-11-12 07:58:15	1	185	85	50- 59	Diurno (tra le 7:00 e le 20:00)	Mattino (tra le 7:00 e le 12:00), Pomeriggio (tra le 14:00 et le 18:00)	da 6 a 9 ore	da 9 a 12 ore	5 e più	2010 abbots way - lavaredo ultra trail	Tra 1 e 2 ore	22:00:00	No	15	No	No	No			No	No	1	No	No	Tra le 7 e le 8 ore	Tra le 8 e le 9 ore	Tra le 8 e le 9 ore	No	Non ne sento il bisogno		No	Non ne sento il bisogno		No	Non ne sento il bisogno		No	Non ne sento il bisogno		No	Non ne sento il bisogno		No	Non ne sento il bisogno		Si	No		Si
2013-11-12 08:00:52	1	168	60	30-39	Diurno (tra le 7:00 e le 20:00)	La sera (dopo 20:00)	da 9 a 12 ore	da 12 a 15 ore	3	morenic trail 2013 110 km in 13 h 56'	Tra 1 e 2 ore	21:00:00	No	2	No	No	No			0	0	2	0	0	Tra le 7 e le 8 ore	Tra le 8 e le 9 ore	Tra le 8 e le 9 ore	Si		1 ora	No	Non ne sento il bisogno		Si		mezz'ora	No	Non ne sento il bisogno		Si		2 ore	Si		2 ore	No			No
2013-11-12 08:02:15	1	165	59	18- 29	A turni	Mattino (tra le 7:00 e le 12:00), Tra le 12:00 e le 14:00, Prima serata (tra le 18:00 et le 20:00)	Più di 15 ore	Più di 15 ore	5 e più	tartufo trail 2013 66 km 8h 50 min	Meno di un’ora	non sto mai davanti ad uno schermo	Si	6 mesi	No	No	No			0	3	1	0	0	Tra le 6 e le 7 ore	Tra le 6 e le 7 ore	Tra le 6 e le 7 ore	No	Non ne sento il bisogno		No	Non ne sento il bisogno		No	Non ne sento il bisogno		No	Non ne sento il bisogno		No	Non ne sento il bisogno		No	Non ne sento il bisogno		No			No
2013-11-12 08:05:12	1	172	63	18- 29	Disoccupato	Mattino (tra le 7:00 e le 12:00), Pomeriggio (tra le 14:00 et le 18:00)	da 12 a 15 ore	Più di 15 ore	3	Ultra trail del lago d'orta 2013	Tra 1 e 2 ore	22:00:00	No	5	No	No	No			0	0	0	0	0	Tra le 8 e le 9 ore	Tra le 8 e le 9 ore	Tra le 8 e le 9 ore	No	Non ne sento il bisogno		No	Non ne sento il bisogno		No	Non ne sento il bisogno		No	Non ne sento il bisogno		No	Non ne sento il bisogno		No	Non ne sento il bisogno		No			No
2013-11-12 08:08:29	2	160	55	30-39	Diurno (tra le 7:00 e le 20:00)	Tra le 12:00 e le 14:00	da 6 a 9 ore	da 12 a 15 ore	3	TDS 2013 19h20 4^donna TOR DE GEANTS 2013 94h45 3^donna	Meno di un’ora	non sto mai davanti ad uno schermo	No	8	No	No	No			0	1	1	0	0	Tra le 6 e le 7 ore	Tra le 6 e le 7 ore	Tra le 7 e le 8 ore	No	Non ho tempo		Si		20/30min	No	Non ho tempo		No	Non ho tempo		No	Non ho tempo		Si		20/30min	Si	No		No
2013-11-12 08:12:21	1	178	78	30-39	Diurno (tra le 7:00 e le 20:00)	Tra le 12:00 e le 14:00, Varia di giorno in giorno	da 3 a 6 ore	da 6 a 9 ore	5 e più	il malandrino 2013	Più di 3 ore	23:00:00	No	6	No	No	No			0	2	0	0	1	Tra le 6 e le 7 ore	Tra le 7 e le 8 ore	Tra le 8 e le 9 ore	Si		1ora	Si			No	non ho tempo per entrambe		Si		1 ora	No	non ho tempo		Si		1 ora	Si	No		No
2013-11-12 08:12:45	1	170	67	40-49	Diurno (tra le 7:00 e le 20:00)	Prima serata (tra le 18:00 et le 20:00)	da 3 a 6 ore	da 9 a 12 ore	3	19 pos 2013	Tra 1 e 2 ore	23:00:00	Si	13	No	No	No			0	3	0	0	0	Tra le 7 e le 8 ore	Tra le 8 e le 9 ore	Tra le 8 e le 9 ore	No	Non ho tempo		No	Non ne sento il bisogno		No	Non ho tempo		No	Non ne sento il bisogno		No	Non ho tempo		Si		1h	Si	No		No
2013-11-12 08:14:50	1	165	56	40-49	Diurno (tra le 7:00 e le 20:00)	Prima delle 7:00	da 3 a 6 ore	da 6 a 9 ore	1	2013 - Trail Lago d'Orta - 14h	Meno di un’ora	22:00:00	Si	1	No	No	No			0	0	0	0	0	Tra le 7 e le 8 ore	Tra le 7 e le 8 ore	Tra le 7 e le 8 ore	No	Non posso farla (assenza di condizioni che me lo permettano)		No	Non ne sento il bisogno		No	Non posso farla (assenza di condizioni che me lo permettano)		No	Non ne sento il bisogno		No	Non posso farla (assenza di condizioni che me lo permettano)		Si		2h	No			No
2013-11-12 08:16:16	1	172	60	18- 29	Diurno (tra le 7:00 e le 20:00)	Mattino (tra le 7:00 e le 12:00), Prima serata (tra le 18:00 et le 20:00), Varia di giorno in giorno	da 9 a 12 ore	da 12 a 15 ore	2	Valdigne 2012 diciassettesimo	Tra 1 e 2 ore	23:00:00	Si	3	No	No	No			0	1	2	0	0	Tra le 8 e le 9 ore	Tra le 8 e le 9 ore	Tra le 8 e le 9 ore	No	Non ne sento il bisogno		No	Non ne sento il bisogno		No	Non ho tempo		Si		30/45 min	No	Non ho tempo		Si		30/45min	Si	No		No
2013-11-12 08:16:59	1	170	65	40-49	Diurno (tra le 7:00 e le 20:00)	Varia di giorno in giorno	da 3 a 6 ore	da 6 a 9 ore	0	6,4	Tra 1 e 2 ore	23:00:00	Si	1	No	No	No			0	5	0	0	0	Tra le 5 e le 6 ore	Tra le 5 e le 6 ore	Tra le 5 e le 6 ore	No	Non ho tempo		No			No			No			No			No			No			No
2013-11-12 08:22:56	1	180	74	40-49	Disoccupato	Mattino (tra le 7:00 e le 12:00), Prima serata (tra le 18:00 et le 20:00)	da 9 a 12 ore	da 12 a 15 ore	1	2013	Tra 1 e 2 ore	23:00:00	No	10	No	No	No			0	2	1	0	0	Tra le 6 e le 7 ore	Tra le 6 e le 7 ore	Tra le 6 e le 7 ore	No	Non ne sento il bisogno		No	Non ne sento il bisogno		Si		1 h	No	Non ne sento il bisogno		Si		1h	No	Non ne sento il bisogno		Si	No		No
2013-11-12 08:23:36	1	180	72	50- 59	Disoccupato	Mattino (tra le 7:00 e le 12:00), Pomeriggio (tra le 14:00 et le 18:00), Prima serata (tra le 18:00 et le 20:00)	da 6 a 9 ore	da 9 a 12 ore	2	La mia vittoria è arrivare e sono sempre circa a tre quarti della classifica tanti davanti pochi didietro	Meno di un’ora	22:00:00	No	15	No	No	No		Leggo un libro	Non fumo	4	1	0	2	Tra le 5 e le 6 ore	Tra le 6 e le 7 ore	Tra le 6 e le 7 ore	No	Non ho tempo		Si		1 ora	No			Si		1 ors	No			Si		2/3 ore	Si	No		No
2013-11-12 08:29:43	1	176	70	30-39	Disoccupato	Pomeriggio (tra le 14:00 et le 18:00)	Meno di 3 ore	da 6 a 9 ore	5 e più	14mo UTMB 1mo Porte di pietra e altre vittorie	Più di 3 ore	22:00:00	No	1	No	No	No			0	2	0	0	0	Tra le 8 e le 9 ore	Tra le 8 e le 9 ore	Tra le 8 e le 9 ore	Si	Non ne sento il bisogno	1ora	Si	Non ne sento il bisogno	1ora	Si	Non ne sento il bisogno	1ora	Si	Non ne sento il bisogno	1ora	Si	Non ne sento il bisogno	1ora	Si	Non ne sento il bisogno	1ora	Si	No		No
2013-11-12 08:30:13	1	175	69	30-39	A turni	Varia di giorno in giorno	da 9 a 12 ore	da 12 a 15 ore	2	2 posto 2013	Meno di un’ora	Mai dopo 20:00	No	2	No	No	No			0	2	1	0	0	Più di 10 ore	Più di 10 ore	Tra le 5 e le 6 ore	No	Non posso farla (assenza di condizioni che me lo permettano)		Si		2 ore	Si		2 ore	Si		2 ore	No	Non ho tempo		Si		2 ore	No			No
2013-11-12 08:30:45	1	184	78	30-39	Diurno (tra le 7:00 e le 20:00)	Tra le 12:00 e le 14:00, La sera (dopo 20:00)	da 9 a 12 ore	da 12 a 15 ore	5 e più	1o posto trail 50km 2009	Tra 1 e 2 ore	23:00:00	No	2	No	Si	No			0	2017-03-02	1	0	0	Tra le 6 e le 7 ore	Tra le 5 e le 6 ore	Tra le 7 e le 8 ore	No	Non posso farla (assenza di condizioni che me lo permettano)		No	Non ho tempo		No	Non ho tempo		No	Non ho tempo		No	Non ho tempo		No	Non ho tempo		Si	No		No
2013-11-12 08:32:10	1	177	74	30-39	Diurno (tra le 7:00 e le 20:00)	Tra le 12:00 e le 14:00, La sera (dopo 20:00)	da 3 a 6 ore	da 6 a 9 ore	2	15° Morenic Trail 2012	Tra 1 e 2 ore	Dopo la mezzanotte	No	5	No	No	No			0	5	1	1	2	Tra le 6 e le 7 ore	Tra le 6 e le 7 ore	Tra le 7 e le 8 ore	No	Non ne sento il bisogno		No	Non ne sento il bisogno		No	Non ne sento il bisogno		No	Non ne sento il bisogno		No	Non ne sento il bisogno		No	Non ne sento il bisogno		No			No
2013-11-12 08:37:52	1	184	75	30-39	Diurno (tra le 7:00 e le 20:00)	Mattino (tra le 7:00 e le 12:00), La sera (dopo 20:00), Varia di giorno in giorno	Più di 15 ore	Più di 15 ore	1	2011 - 4° classificato Ultra trail del Verdon (100 km - 7000 D+)	Meno di un’ora	non sto mai davanti ad uno schermo	No	2	No	No	No	---	---	0	0	1	0	0	Tra le 7 e le 8 ore	Tra le 6 e le 7 ore	Tra le 8 e le 9 ore	No	Non ho tempo		No	Non ne sento il bisogno		No	Non ho tempo		Si		1 ora	No	Non ho tempo		Si		1 ora	Si	Si	30 ore - 15 minuti di sonno	No
2013-11-12 08:41:00	1	182	74	40-49	Diurno (tra le 7:00 e le 20:00)	Varia di giorno in giorno	da 3 a 6 ore	da 6 a 9 ore	1	2012	Meno di un’ora	22:00:00	No	13	No	Si	No		leggo	0	3	0	0	0	Tra le 6 e le 7 ore	Tra le 6 e le 7 ore	Tra le 7 e le 8 ore	No	Non ne sento il bisogno		No	Non ne sento il bisogno		No	Non ne sento il bisogno		No	Non ne sento il bisogno		No	Non ne sento il bisogno		No	Non ne sento il bisogno		Si	No		No
2013-11-12 08:44:51	1	180	72	30-39	Diurno (tra le 7:00 e le 20:00)	Prima serata (tra le 18:00 et le 20:00)	da 6 a 9 ore	da 9 a 12 ore	0	superiori ai 65 km non ne ho fatte	Tra 2 e 3 ore	23:00:00	No	4	No	No	No			0	2	0	0	2	Tra le 6 e le 7 ore	Tra le 6 e le 7 ore	Tra le 7 e le 8 ore	No	Non ne sento il bisogno		No	Non ne sento il bisogno		No	Non ne sento il bisogno		No	Non ne sento il bisogno		No	Non ne sento il bisogno		No	Non posso farla (assenza di condizioni che me lo permettano)		No			No
2013-11-12 08:46:49	1	170	74	40-49	Diurno (tra le 7:00 e le 20:00)	Varia di giorno in giorno	da 9 a 12 ore	da 12 a 15 ore	4	3° Gran Trail 3V 2012	Tra 1 e 2 ore	23:00:00	No	15	No	No	No			0	2	3	0	1	Tra le 6 e le 7 ore	Tra le 7 e le 8 ore	Tra le 8 e le 9 ore	No	Non posso farla (assenza di condizioni che me lo permettano)		No	Non ne sento il bisogno		No	Non posso farla (assenza di condizioni che me lo permettano)		No	Non ne sento il bisogno		No	Non posso farla (assenza di condizioni che me lo permettano)		No	Non ne sento il bisogno		Si	No		Si
2013-11-12 08:49:24	1	181	66	30-39	Diurno (tra le 7:00 e le 20:00)	Prima delle 7:00	da 6 a 9 ore	da 12 a 15 ore	2	2012 The Abbots Way 17h09'	Tra 2 e 3 ore	Dopo la mezzanotte	No	11	No	No	No			0	0	0	0	0	Tra le 5 e le 6 ore	Tra le 6 e le 7 ore	Tra le 7 e le 8 ore	No	Non ho tempo	15 minuti	No	Non ne sento il bisogno	15'	No	Non ho tempo	15'	Si		30'	No	Non ho tempo	15'	Si		30'	Si	No		No
2013-11-12 08:52:47	1	170	68	50- 59	Diurno (tra le 7:00 e le 20:00)	Mattino (tra le 7:00 e le 12:00), Tra le 12:00 e le 14:00	da 3 a 6 ore	da 6 a 9 ore	2	ptl 2013	Tra 1 e 2 ore	23:00:00	No	10	No	No	No			0	3	0	0	1	Tra le 6 e le 7 ore	Tra le 6 e le 7 ore	Tra le 6 e le 7 ore	No	Non ne sento il bisogno		No	Non ne sento il bisogno		No	Non ne sento il bisogno		No	Non ne sento il bisogno		No	Non ne sento il bisogno		Si		2 ore	Si	No		Si
2013-11-12 09:02:31	1	173	62	30-39	Diurno (tra le 7:00 e le 20:00)	Prima serata (tra le 18:00 et le 20:00)	da 12 a 15 ore	da 12 a 15 ore	3	Ultratrail li faccio come allenamento x ulttamaratone su cemento con salita. Nove colli running 20 ore, 2012. 1° classificato	Più di 3 ore	Dopo la mezzanotte	Si	3	No	No	No			nn fumo	nessuna	nessuna	1,5 litri	nn bevo	Tra le 5 e le 6 ore	Tra le 6 e le 7 ore	Tra le 6 e le 7 ore	No	Non ne sento il bisogno		No	Non ne sento il bisogno		No	Non ne sento il bisogno		No	Non ne sento il bisogno		No	Non ne sento il bisogno		No	Non ne sento il bisogno		Si	No		No
2013-11-12 09:10:47	2	165	55	30-39	A turni	Mattino (tra le 7:00 e le 12:00), Tra le 12:00 e le 14:00, Pomeriggio (tra le 14:00 et le 18:00)	da 9 a 12 ore	da 12 a 15 ore	4	mondiale irlanda 5 valdigne 4 porte di pietra 1	Meno di un’ora	22:00:00	No	10	No	Si	No			0	3	0	0	2	Tra le 7 e le 8 ore	Tra le 7 e le 8 ore	Tra le 9 e le 10 ore	No	Non posso farla (assenza di condizioni che me lo permettano)		Si		1	No	Non ho tempo		Si		1	No	Non ho tempo		Si		2	Si	No		No
2013-11-12 09:23:32	1	177	73	50- 59	Diurno (tra le 7:00 e le 20:00)	Varia di giorno in giorno	da 6 a 9 ore	da 9 a 12 ore	0	8h55' tre cime lavaredo 2008	Meno di un’ora	Mai dopo 20:00	No	13	No	No	No			0	2017-02-01	0	0	2017-02-01	Tra le 5 e le 6 ore	Tra le 6 e le 7 ore	Tra le 6 e le 7 ore	No	Non ne sento il bisogno		No	Non ne sento il bisogno		No	Non ne sento il bisogno		No	Non ne sento il bisogno		No	Non ne sento il bisogno		No	Non ne sento il bisogno		Si	No		Si
2013-11-12 09:28:42	1	176	73	40-49	Diurno (tra le 7:00 e le 20:00)	Mattino (tra le 7:00 e le 12:00), Prima serata (tra le 18:00 et le 20:00)	da 3 a 6 ore	da 6 a 9 ore	2	12h e 30 alla Lavaredo Ultra Trail 258° nel 2013	Tra 1 e 2 ore	22:00:00	No	3	No	No	No			0	0-1	1	0	1	Tra le 6 e le 7 ore	Tra le 6 e le 7 ore	Tra le 6 e le 7 ore	Si		30 minuti	Si		30 minuti	Si		30 minuti	Si		30 minuti	Si		30 minuti	Si		30 minuti	No			No
2013-11-12 09:48:58	1	175	74	50- 59	Diurno (tra le 7:00 e le 20:00)	Prima delle 7:00, Prima serata (tra le 18:00 et le 20:00)	da 6 a 9 ore	da 6 a 9 ore	2	2011	Tra 1 e 2 ore	23:00:00	Si	25	No	No	No			nessuna	3	nessuna	1	nessuno	Tra le 7 e le 8 ore	Tra le 6 e le 7 ore	Tra le 7 e le 8 ore	No	Non ne sento il bisogno		No	Non ne sento il bisogno		Si	Non ne sento il bisogno		Si	Non ne sento il bisogno		Si	Non ne sento il bisogno		Si	Non ne sento il bisogno		Si	No		No
2013-11-12 09:58:20	1	167	72	30-39	Diurno (tra le 7:00 e le 20:00)	La sera (dopo 20:00)	da 6 a 9 ore	da 9 a 12 ore	0	mai fatti ultra trai		Dopo la mezzanotte	Si	11	No	No	No			0	2	0	0	0	Tra le 7 e le 8 ore	Tra le 6 e le 7 ore	Tra le 8 e le 9 ore	No	Non ne sento il bisogno		Si		2 ore	No	Non ne sento il bisogno		Si		2 ore	Si		2 ore	Si		2 ore	Si	No		No
2013-11-12 09:59:18	1	175	63	40-49	Diurno (tra le 7:00 e le 20:00)	Prima delle 7:00, Mattino (tra le 7:00 e le 12:00)	da 9 a 12 ore	da 12 a 15 ore	3	2012 199 km 13 ore 50	Tra 2 e 3 ore	22:00:00	No	5	No	No	No			4	5	0	0	1	Tra le 6 e le 7 ore	Tra le 6 e le 7 ore	Tra le 7 e le 8 ore	Si		1 ora	Si			Si		1 ora	Si			Si		1 ora	Si		1 ora	Si	No		No
2013-11-12 10:10:14	1	175	67	40-49	Diurno (tra le 7:00 e le 20:00)	Prima delle 7:00, La sera (dopo 20:00)	da 3 a 6 ore	da 9 a 12 ore	2	2012 CRO	Meno di un’ora	Mezzanotte	No	5	No	No	No			0	2	0	0	2 VINO	Tra le 6 e le 7 ore	Tra le 7 e le 8 ore	Tra le 7 e le 8 ore	No	Non ne sento il bisogno		No	Non ne sento il bisogno		No	Non ne sento il bisogno		No	Non ne sento il bisogno		No	Non ne sento il bisogno		No	Non ne sento il bisogno		Si	No		No
2013-11-12 10:16:06	1	195	88	30-39	Diurno (tra le 7:00 e le 20:00)	Tra le 12:00 e le 14:00	da 6 a 9 ore	da 3 a 6 ore	2	METà CLASSIFICA	Tra 1 e 2 ore	23:00:00	Si	1	No	No	No			0	2	5	0	2	Tra le 8 e le 9 ore	Tra le 8 e le 9 ore	Tra le 7 e le 8 ore	Si		20 MIN	Si		20 MIN	Si		20 MIN	Si		20 MIN	Si		20 MIN	Si		20 MIN	Si	No		No
2013-11-12 10:20:07	1	172	63	18- 29	Disoccupato	Mattino (tra le 7:00 e le 12:00)	da 9 a 12 ore	da 12 a 15 ore	0	Non ne ho mai corse	Meno di un’ora	Mai dopo 20:00	No	1	No	No	No	Nulla	Nulla	10	2	0	0	1	Tra le 8 e le 9 ore	Tra le 8 e le 9 ore	Tra le 8 e le 9 ore	Si		30 minuti	Si		30 minuti	Si		30 minuti	Si		30 minuti	Si		30 minuti	Si		30 minuti	No			No
2013-11-12 10:25:56	1	167	70	> 60	Diurno (tra le 7:00 e le 20:00)	Mattino (tra le 7:00 e le 12:00), Varia di giorno in giorno	da 6 a 9 ore	Meno di 3 ore	4	ultra trail du mont blanc 2013 in 45 ore	Tra 2 e 3 ore	23:00:00	No	2	No	Si	Si	omeopatici		no	2	0	0	0	Tra le 6 e le 7 ore	Tra le 6 e le 7 ore	Tra le 6 e le 7 ore	Si		10 minuti ( digestione	Si		10 minuti	Si		10 miniti	Si			Si			Si		10 minuti	Si			Si
2013-11-12 10:26:55	1	167	70	> 60	Diurno (tra le 7:00 e le 20:00)	Mattino (tra le 7:00 e le 12:00), Varia di giorno in giorno	da 6 a 9 ore	Meno di 3 ore	4	ultra trail du mont blanc 2013 in 45 ore	Tra 2 e 3 ore	23:00:00	No	2	No	Si	Si	omeopatici		no	2	0	0	0	Tra le 6 e le 7 ore	Tra le 6 e le 7 ore	Tra le 6 e le 7 ore	Si		10 minuti ( digestione	Si		10 minuti	Si		10 miniti	Si			Si			Si		10 minuti	Si			Si
2013-11-12 10:27:34	1	185	84	40-49	Diurno (tra le 7:00 e le 20:00)	Mattino (tra le 7:00 e le 12:00), Pomeriggio (tra le 14:00 et le 18:00), La sera (dopo 20:00)	da 6 a 9 ore	Più di 15 ore	2	359 utmb 2011	Meno di un’ora	23:00:00	Si	1	No	No	No	nulla	nulla	0	3	1	1	2	Meno di 5 ore	Meno di 5 ore	Tra le 6 e le 7 ore	No	Non ne sento il bisogno		No	Non ne sento il bisogno		Si		2 ore	Si		2 ore	Si		2 ore	Si		2ore	Si			Si
2013-11-12 10:37:37	1	178	74	50- 59	A turni	Mattino (tra le 7:00 e le 12:00), Varia di giorno in giorno	da 3 a 6 ore	Più di 15 ore	3	323 tor des geants 2012	Tra 1 e 2 ore	Mezzanotte	No	30	No	No	No			0	5	2	3	0	Tra le 6 e le 7 ore	Tra le 6 e le 7 ore	Tra le 6 e le 7 ore	Si	Non ne sento il bisogno	2	No	Non ne sento il bisogno	2	Si	Non ho tempo	2	No	Non ne sento il bisogno	1	Si	Non ho tempo	1	No	Non ho tempo	1	Si	No		Si
2013-11-12 10:53:06	1	177	70	> 60	Disoccupato	Mattino (tra le 7:00 e le 12:00), Varia di giorno in giorno	da 3 a 6 ore	da 6 a 9 ore	3	2013	Tra 2 e 3 ore	23:00:00	No	20	No	No	No			0	2	1	0	0	Tra le 5 e le 6 ore	Tra le 6 e le 7 ore	Tra le 6 e le 7 ore	Si		1/2 ora	Si		1/2 ora	Si		1/2 ora	Si		1/2 ora	Si		1 ora	Si		1 ora	Si	No		Si
2013-11-12 11:02:57	1	177	80	50- 59	Diurno (tra le 7:00 e le 20:00)	Prima delle 7:00, Tra le 12:00 e le 14:00, La sera (dopo 20:00)	da 3 a 6 ore	da 6 a 9 ore	2	2012 - 4° class - 90 km	Meno di un’ora	23:00:00	No	5	No	No	No			0	1	0	0	0	Tra le 6 e le 7 ore	Tra le 6 e le 7 ore	Tra le 6 e le 7 ore	No	Non ne sento il bisogno		No	Non ne sento il bisogno		No	Non ne sento il bisogno		No	Non ne sento il bisogno		No	Non ne sento il bisogno		No	Non ne sento il bisogno		Si	Si	36 ore gara - 0 ore sonno 35 ore gara - 0 ore sonno 35 ore gara - svariati colpi di sonno 41 ore gara - 2 ore sonno	Si
2013-11-12 11:18:29	1	183	78	50- 59	Diurno (tra le 7:00 e le 20:00)	Tra le 12:00 e le 14:00, Pomeriggio (tra le 14:00 et le 18:00)	da 3 a 6 ore	da 6 a 9 ore	2	forse la LUT del 2009 ( o era il 2008)	Meno di un’ora	21:00:00	No	8	No	No	No		nessuno	0	4	0	0	0/max.1	Tra le 6 e le 7 ore	Tra le 6 e le 7 ore	Tra le 7 e le 8 ore	No	a volte	15 min.	No	Non posso farla (assenza di condizioni che me lo permettano)		No	Non posso farla (assenza di condizioni che me lo permettano)		No	Non posso farla (assenza di condizioni che me lo permettano)		Si		15 min	Si	Non posso farla (assenza di condizioni che me lo permettano)	15 min	Si	Si	all'Abbott's way. pochissimo e male per mancanza di posto idoneo.	No
2013-11-12 11:23:06	2	165	56	40-49	Diurno (tra le 7:00 e le 20:00)	Mattino (tra le 7:00 e le 12:00), Pomeriggio (tra le 14:00 et le 18:00)	da 3 a 6 ore	da 3 a 6 ore	0	nesuno	Tra 1 e 2 ore	22:00:00	No	3	No	No	No			ZERO	3	QUASI MAI	nessuno	nessuna	Tra le 5 e le 6 ore	Tra le 6 e le 7 ore	Tra le 6 e le 7 ore	No	Non ho tempo		No	Non ho tempo		No	Non ho tempo		No	Non ho tempo		No	Non ho tempo		No	Non ho tempo		No			No
2013-11-12 11:28:59	1	176	71	40-49	Diurno (tra le 7:00 e le 20:00)	Pomeriggio (tra le 14:00 et le 18:00), Prima serata (tra le 18:00 et le 20:00)	da 3 a 6 ore	da 6 a 9 ore	1	Finisher UTMB 2007	Tra 2 e 3 ore	22:00:00	Si	1	No	No	No			0	1	1	1	1	Tra le 8 e le 9 ore	Tra le 8 e le 9 ore	Tra le 7 e le 8 ore	No	Non ho tempo		Si		15 minuti	No	Non ho tempo		No			No	Non ho tempo		Si		30	Si	No		Si
2013-11-12 11:42:57	1	165	59	30-39	Diurno (tra le 7:00 e le 20:00)	Tra le 12:00 e le 14:00	da 6 a 9 ore	da 9 a 12 ore	2	Cro magnon 2010 20 ore	Tra 1 e 2 ore	22:00:00	No	10	No	No	No			0	4	0	0	0	Tra le 6 e le 7 ore	Tra le 6 e le 7 ore	Tra le 7 e le 8 ore	No	Non ne sento il bisogno		No	Non ne sento il bisogno		No	Non ne sento il bisogno		No	Non ne sento il bisogno		No			Si		1 h	Si	No		Si
2013-11-12 11:46:48	1	176	70	50- 59	A turni	Mattino (tra le 7:00 e le 12:00), Pomeriggio (tra le 14:00 et le 18:00), Varia di giorno in giorno	da 6 a 9 ore	da 9 a 12 ore	1	TDS 2013	Più di 3 ore	22:00:00	No	1	No	No	No			0	1	2	0	2	Tra le 6 e le 7 ore	Tra le 6 e le 7 ore	Tra le 7 e le 8 ore	No	Non ne sento il bisogno		No	Non ne sento il bisogno		No	Non ho tempo		No			No	Non ho tempo		Si		1 ora	Si	No		No
2013-11-12 11:47:52	1	180	78	50- 59	Diurno (tra le 7:00 e le 20:00)	Prima serata (tra le 18:00 et le 20:00)	da 12 a 15 ore	da 12 a 15 ore	0	2013 lago orta trail	Tra 1 e 2 ore	23:00:00	No	1	No	Si	No			0	3	2	0	0	Tra le 5 e le 6 ore	Tra le 5 e le 6 ore	Tra le 5 e le 6 ore	No	Non ne sento il bisogno		No	Non ne sento il bisogno		No	Non ne sento il bisogno		No	Non ne sento il bisogno		No	Non ne sento il bisogno		No	Non ne sento il bisogno		No			No
2013-11-12 12:13:08	1	178	58	18- 29	Diurno (tra le 7:00 e le 20:00)	Prima serata (tra le 18:00 et le 20:00)	da 6 a 9 ore	da 6 a 9 ore	3	15 assoluto nel 2013 3 rifugi val pellice	Tra 1 e 2 ore	22:00:00	Si	1	No	No	No			nessuna	1	nesuna	essuna	nessuna	Tra le 8 e le 9 ore	Tra le 7 e le 8 ore	Tra le 7 e le 8 ore	No	Non ne sento il bisogno		No	Non ne sento il bisogno		No	Non ne sento il bisogno		No	Non ne sento il bisogno		No	Non ne sento il bisogno		No			No			No
2013-11-12 12:47:44	1	176	60	30-39	Diurno (tra le 7:00 e le 20:00)	Varia di giorno in giorno	da 6 a 9 ore	da 9 a 12 ore	1	2013	Tra 1 e 2 ore	21:00:00	No	2	No	No	No			0	3	0	0	0	Tra le 7 e le 8 ore	Tra le 7 e le 8 ore	Tra le 6 e le 7 ore	No	Non ne sento il bisogno		No	Non ne sento il bisogno		No	Non ne sento il bisogno		No	Non ne sento il bisogno		No	Non ne sento il bisogno		No	Non ne sento il bisogno		Si	No		No
2013-11-12 12:52:44	2	158	57	30-39	Diurno (tra le 7:00 e le 20:00)	Prima delle 7:00, La sera (dopo 20:00)	da 3 a 6 ore	da 6 a 9 ore	1	12:35:00	Tra 1 e 2 ore	23:00:00	Si		No	Si	No			0	2	0	0	0	Tra le 6 e le 7 ore	Tra le 7 e le 8 ore	Tra le 6 e le 7 ore	No	Non ne sento il bisogno		No	Non ne sento il bisogno		No	Non ne sento il bisogno		No	Non ne sento il bisogno		No	Non ne sento il bisogno		No	Non ne sento il bisogno		No			No
2013-11-12 13:43:06	1	1,84	71	30-39	Diurno (tra le 7:00 e le 20:00)	Prima delle 7:00, Prima serata (tra le 18:00 et le 20:00)	da 3 a 6 ore	da 6 a 9 ore	2	2012	Meno di un’ora	22:00:00	No	3	No	No	No			0	2	0	0	0	Tra le 5 e le 6 ore	Tra le 7 e le 8 ore	Tra le 7 e le 8 ore	No	Non ne sento il bisogno		No	Non ne sento il bisogno		No	Non ne sento il bisogno		No	Non ne sento il bisogno		No	Non ho tempo		No	Non ne sento il bisogno		Si	No		No
2013-11-12 13:48:59	1	170	67	40-49	Diurno (tra le 7:00 e le 20:00)	La sera (dopo 20:00)	da 6 a 9 ore	da 6 a 9 ore	1	2011 150km 22h30m	Meno di un’ora	Dopo la mezzanotte	No	5	No	No	No			0	4	2	0	0	Tra le 6 e le 7 ore	Tra le 7 e le 8 ore	Tra le 6 e le 7 ore	Si		40min	Si		40min	Si		40min	Si		40min	Si		40min	Si		40min	Si		37h-1h	No
2013-11-12 13:52:08	1	180	97	30-39	Diurno (tra le 7:00 e le 20:00)	Prima delle 7:00, Mattino (tra le 7:00 e le 12:00)	da 3 a 6 ore	da 6 a 9 ore	4	2012	Tra 2 e 3 ore	Dopo la mezzanotte	No	6	No	Si	No			0	2	0	0	0	Tra le 6 e le 7 ore	Tra le 7 e le 8 ore	Tra le 7 e le 8 ore	No	Non ne sento il bisogno		No	Non ne sento il bisogno		No	Non ne sento il bisogno		No	Non ne sento il bisogno		No	Non ne sento il bisogno		No	Non ne sento il bisogno		Si	No		Si
2013-11-12 13:53:04	1	174	73	30-39	Diurno (tra le 7:00 e le 20:00)	Prima delle 7:00, Pomeriggio (tra le 14:00 et le 18:00), La sera (dopo 20:00)	da 3 a 6 ore	da 3 a 6 ore	2	Ccc 2013	Tra 1 e 2 ore	23:00:00	Si	10	No	No	No			0	4	0	0	0	Tra le 6 e le 7 ore	Tra le 6 e le 7 ore	Tra le 7 e le 8 ore	No	Non ne sento il bisogno		No	Non ne sento il bisogno		No	Non ne sento il bisogno		No	Non ne sento il bisogno		No	Non ne sento il bisogno		No	Non ne sento il bisogno		Si	No		No
2013-11-12 14:09:12	1	178	69	30-39	Diurno (tra le 7:00 e le 20:00)	Mattino (tra le 7:00 e le 12:00), Pomeriggio (tra le 14:00 et le 18:00)	Meno di 3 ore	da 3 a 6 ore	0	0	Tra 1 e 2 ore	22:00:00	No	6	No	No	No			0	1	1	ogni tanto	ogni tanto	Tra le 7 e le 8 ore	Tra le 7 e le 8 ore	Tra le 8 e le 9 ore	No	Non ne sento il bisogno		No	Non ne sento il bisogno		No	Non ho tempo		No	Non ne sento il bisogno		No	Non ho tempo		No	Non posso farla (assenza di condizioni che me lo permettano)		No			No
2013-11-12 14:13:12	1	174	63	30-39	Diurno (tra le 7:00 e le 20:00)	Prima delle 7:00, Tra le 12:00 e le 14:00, La sera (dopo 20:00)	da 3 a 6 ore	da 3 a 6 ore	2	2013	Tra 2 e 3 ore	23:00:00	Si	5	No	No	No		Nessuno... chiudo gli occhi e dormo!!	0	3	1	0	0	Tra le 6 e le 7 ore	Tra le 6 e le 7 ore	Tra le 8 e le 9 ore	No	Non ne sento il bisogno		No	Non ne sento il bisogno		No	Non ne sento il bisogno		No	Non ne sento il bisogno		No	Non ne sento il bisogno		No	Non ne sento il bisogno		Si	No		No
2013-11-12 14:19:26	1	172	62	40-49	Diurno (tra le 7:00 e le 20:00)	Varia di giorno in giorno	da 6 a 9 ore	da 6 a 9 ore	0	0	Tra 1 e 2 ore	23:00:00	Si		No	No	No			0	2	0	0	0/1	Tra le 5 e le 6 ore	Tra le 6 e le 7 ore	Tra le 6 e le 7 ore	No	Non ne sento il bisogno		No	Non ne sento il bisogno		No	Non ne sento il bisogno		No	Non ne sento il bisogno		No	Non ne sento il bisogno		No	Non ne sento il bisogno		No			No
2013-11-12 14:21:35	1	172	79	30-39	Diurno (tra le 7:00 e le 20:00)	Prima serata (tra le 18:00 et le 20:00)	da 6 a 9 ore	da 9 a 12 ore	2	2012	Tra 1 e 2 ore	23:00:00	No	7	Si	No	No			0	2	0	2	0	Tra le 7 e le 8 ore	Tra le 7 e le 8 ore	Tra le 7 e le 8 ore	Si	Non posso farla (assenza di condizioni che me lo permettano)	30 min	Si	Non posso farla (assenza di condizioni che me lo permettano)	30 min	Si	Non posso farla (assenza di condizioni che me lo permettano)	30 min	Si	Non posso farla (assenza di condizioni che me lo permettano)	30 min	Si	Non posso farla (assenza di condizioni che me lo permettano)	30 min	Si	Non posso farla (assenza di condizioni che me lo permettano)	30 min	No	No		No
2013-11-12 14:40:35	1	180	75	18- 29	Diurno (tra le 7:00 e le 20:00)	Prima serata (tra le 18:00 et le 20:00), La sera (dopo 20:00)	da 6 a 9 ore	da 9 a 12 ore	0	2013	Tra 1 e 2 ore	23:00:00	No	4	No	No	No			0	0	0	0	0	Tra le 7 e le 8 ore	Tra le 8 e le 9 ore	Tra le 6 e le 7 ore	No	Non ho tempo		No	Non ho tempo	1	No	Non ho tempo		No	Non ho tempo		No	Non ho tempo		No	Non ho tempo		No			No
2013-11-12 14:41:52	2	160	54	40-49	Diurno (tra le 7:00 e le 20:00)	Mattino (tra le 7:00 e le 12:00)	da 6 a 9 ore	da 12 a 15 ore	3	2013	Meno di un’ora	23:00:00	Si	1	No	No	No			0	4	1	0	0	Più di 10 ore	Tra le 9 e le 10 ore	Più di 10 ore	No	Non ne sento il bisogno		No	Non ne sento il bisogno		No	Non ne sento il bisogno		No	Non ne sento il bisogno		No	Non ne sento il bisogno		No	Non ne sento il bisogno		Si	Si	29 0re tempo di gara; 30minuti sonno	No
2013-11-12 14:43:51	1	183	83	30-39	Diurno (tra le 7:00 e le 20:00)	Pomeriggio (tra le 14:00 et le 18:00)	da 6 a 9 ore	da 9 a 12 ore	4	100 e lode 15 ore 2013	Tra 1 e 2 ore	23:00:00	No	10	No	Si	No			0	2017-04-03	0	0	2	Tra le 6 e le 7 ore	Tra le 7 e le 8 ore	Tra le 6 e le 7 ore	Si	Non posso farla (assenza di condizioni che me lo permettano)	15min	No	Non ne sento il bisogno		Si	Non ho tempo	15 min	Si	Non ne sento il bisogno		Si	Non ho tempo	15	Si	Non ho tempo		Si	No		No
2013-11-12 14:54:26	1	193	80	18- 29	Diurno (tra le 7:00 e le 20:00)	Prima serata (tra le 18:00 et le 20:00)	da 6 a 9 ore	da 12 a 15 ore	1	Val digne 2012	Tra 1 e 2 ore	22:00:00	No	1	No	No	No		vado a letto	0	0	0	0	0	Tra le 7 e le 8 ore	Tra le 8 e le 9 ore	Tra le 8 e le 9 ore	No	Non ho tempo		Si		1 h	No	Non ho tempo		Si		1h	No	Non ho tempo		Si		1h	Si	No		No
2013-11-12 14:54:42	1	193	80	18- 29	Diurno (tra le 7:00 e le 20:00)	Prima serata (tra le 18:00 et le 20:00)	da 6 a 9 ore	da 12 a 15 ore	1	Val digne 2012	Tra 1 e 2 ore	22:00:00	No	1	No	No	No		vado a letto	0	0	0	0	0	Tra le 7 e le 8 ore	Tra le 8 e le 9 ore	Tra le 8 e le 9 ore	No	Non ho tempo		Si		1 h	No	Non ho tempo		Si		1h	No	Non ho tempo		Si		1h	Si	No		No
2013-11-12 15:18:49	1	182	80	40-49	Diurno (tra le 7:00 e le 20:00)	Prima serata (tra le 18:00 et le 20:00)	da 6 a 9 ore	da 9 a 12 ore	4	Trail Cenis Tour 2013 50 Km 3° assoluto TDS 2013 119Km 31° assoluto	Tra 1 e 2 ore	23:00:00	No	1	No	No	No			Non fumo	1	Nessuna	Nessuno ..solo in gara	Nessuno	Tra le 6 e le 7 ore	Tra le 9 e le 10 ore	Tra le 7 e le 8 ore	No	Non ho tempo		No	Non ho tempo		No	Non ho tempo		No	Non ho tempo		No	Non ho tempo		No	Non ho tempo		Si	No		Si
2013-11-12 15:43:58	1	180	86	30-39	Diurno (tra le 7:00 e le 20:00)	Prima serata (tra le 18:00 et le 20:00)	da 6 a 9 ore	da 6 a 9 ore	1	2013 170esimo tor des geants	Tra 1 e 2 ore	22:00:00	Si	2	No	No	No			0	2	0	1	1	Tra le 6 e le 7 ore	Tra le 8 e le 9 ore	Tra le 8 e le 9 ore	No	Non ho tempo		No	Non ne sento il bisogno		No	Non ho tempo		No	Non ne sento il bisogno		No	Non ho tempo		No	Non ne sento il bisogno		No	No		No
2013-11-12 16:31:48	1	171	59	30-39	Diurno (tra le 7:00 e le 20:00)	Pomeriggio (tra le 14:00 et le 18:00), Prima serata (tra le 18:00 et le 20:00)	da 9 a 12 ore	da 12 a 15 ore	0	30esimo ElbaTrail 2013	Tra 1 e 2 ore	Mezzanotte	Si	3	No	No	No			0	3	0	0	1	Tra le 6 e le 7 ore	Tra le 6 e le 7 ore	Tra le 6 e le 7 ore	No	Non sono capace		No	Non sono capace		No	Non sono capace		No	Non sono capace		No			No			No			No
2013-11-12 16:59:03	1	184	89	40-49	Diurno (tra le 7:00 e le 20:00)	Prima delle 7:00, La sera (dopo 20:00), Varia di giorno in giorno	Meno di 3 ore	Più di 15 ore	1	11:10 2013	Tra 1 e 2 ore	Dopo la mezzanotte	Si	7	No	Si	No			0	7	0	0	2	Tra le 5 e le 6 ore	Tra le 6 e le 7 ore	Tra le 7 e le 8 ore	No	Non ne sento il bisogno		No	Non ne sento il bisogno		No	Non ne sento il bisogno		No	Non ne sento il bisogno		No	Non ne sento il bisogno		No	Non ne sento il bisogno		No			No
2013-11-12 22:55:11	1	178	80	40-49	Diurno (tra le 7:00 e le 20:00)	Mattino (tra le 7:00 e le 12:00), Prima serata (tra le 18:00 et le 20:00), Varia di giorno in giorno	da 3 a 6 ore	da 6 a 9 ore	1	2013	Tra 1 e 2 ore	22:00:00	Si	5	No	Si	No		lettura	0	4	0	0	3	Tra le 5 e le 6 ore	Tra le 5 e le 6 ore	Tra le 5 e le 6 ore	Si	Non ho tempo	40 min	Si		40 min	No	Non posso farla (assenza di condizioni che me lo permettano)		Si		40 mi	No	Non posso farla (assenza di condizioni che me lo permettano)		Si		40 min	Si	No		No
2013-11-12 23:09:41	1	190	89	40-49	Diurno (tra le 7:00 e le 20:00)	Prima delle 7:00, Prima serata (tra le 18:00 et le 20:00)	Meno di 3 ore	da 6 a 9 ore	2	Anno 2011 3° Categoria MM45 Pionieri del Gran Sasso	Meno di un’ora	22:00:00	No	20 anni	No	No	No		leggere	NO	3	1	0	1	Tra le 7 e le 8 ore	Tra le 8 e le 9 ore	Tra le 7 e le 8 ore	No	Non ne sento il bisogno	30'	No	Non ne sento il bisogno	30'	No	Non ne sento il bisogno	0	Si	Non ne sento il bisogno	30'	Si	Non ne sento il bisogno	30'	Si	Non ne sento il bisogno	30'	No	No		No
2013-11-12 23:38:47	1	170	65	30-39	Diurno (tra le 7:00 e le 20:00)	Prima serata (tra le 18:00 et le 20:00), La sera (dopo 20:00)	da 3 a 6 ore	da 3 a 6 ore	2	55 anno 2010	Meno di un’ora	Mezzanotte	No	1	No	No	No			0	4	0	0	1	Tra le 5 e le 6 ore	Tra le 6 e le 7 ore	Tra le 6 e le 7 ore	No	Non ho tempo		Si		30 min	No	Non ho tempo		No	Non ho tempo		No	Non ho tempo		No	Non ho tempo		Si	No		Si
2013-11-13 00:34:21	1	172	61	18- 29	Diurno (tra le 7:00 e le 20:00)	Mattino (tra le 7:00 e le 12:00), Pomeriggio (tra le 14:00 et le 18:00)	da 6 a 9 ore	da 12 a 15 ore	0	2013	Tra 1 e 2 ore	21:00:00	Si	15	No	Si	No			0	2	1	0	0	Tra le 7 e le 8 ore	Tra le 7 e le 8 ore	Tra le 7 e le 8 ore	No	Non ne sento il bisogno		No	Non ne sento il bisogno		No	Non ho tempo		Si		0.5 ore	No	Non ho tempo		Si		0.5 ore	No			No
2013-11-13 01:06:30	2	167	51	40-49	Diurno (tra le 7:00 e le 20:00)	Varia di giorno in giorno	da 6 a 9 ore	da 9 a 12 ore	2	2013 terza ai mondiali	Tra 1 e 2 ore	22:00:00	Si	6	Si	Si	No			0	2p	0	1	0	Tra le 7 e le 8 ore	Tra le 7 e le 8 ore	Tra le 6 e le 7 ore	No	Non posso farla (assenza di condizioni che me lo permettano)		Si		2 ore	No	Non ho tempo		No	Non ne sento il bisogno		No	Non ho tempo		No	Non ho tempo		No	No		No
2013-11-13 01:10:32	2	167	51	40-49	Diurno (tra le 7:00 e le 20:00)	Varia di giorno in giorno	da 6 a 9 ore	da 9 a 12 ore	2	2013 terza ai mondiali	Tra 1 e 2 ore	22:00:00	Si	6	Si	Si	No			0	2p	0	1	0	Tra le 7 e le 8 ore	Tra le 7 e le 8 ore	Tra le 6 e le 7 ore	No	Non posso farla (assenza di condizioni che me lo permettano)		Si		2 ore	No	Non ho tempo		No	Non ne sento il bisogno		No	Non ho tempo		No	Non ho tempo		No	No		No
2013-11-13 01:12:20	1	205	105	40-49	Diurno (tra le 7:00 e le 20:00)	Tra le 12:00 e le 14:00	Meno di 3 ore	da 3 a 6 ore	0	0	Tra 1 e 2 ore	21:00:00	No	8	No	No	No		Meditazione vipassana!	0	2	0	0	2	Tra le 7 e le 8 ore	Tra le 7 e le 8 ore	Tra le 7 e le 8 ore	Si		1 ora	Si		1	No	Non ho tempo		Si		1 ora	Si		1 ora	Si		1 ora	No			No
2013-11-13 01:37:37	1	178	65	50- 59	Diurno (tra le 7:00 e le 20:00)	Tra le 12:00 e le 14:00	da 6 a 9 ore	da 9 a 12 ore	4	6° Monte Soglio 2011, 13° Trans d'Havet 2012, 20° Cromagnon 2012	Meno di un’ora	21:00:00	Si	5	No	No	No		penso a cose positive	0	0	0	0	0,5	Tra le 8 e le 9 ore	Tra le 8 e le 9 ore	Tra le 8 e le 9 ore	No			No			No	Non ho tempo	h1,5	Si		h1,30	No	Non ho tempo		Si		2,3	Si	No		No
2013-11-13 01:44:09	1	173	70	40-49	Diurno (tra le 7:00 e le 20:00)	Tra le 12:00 e le 14:00, Prima serata (tra le 18:00 et le 20:00)	da 6 a 9 ore	da 9 a 12 ore	3	TDS 2011	Tra 1 e 2 ore	21:00:00	No	3	No	No	No			nessuna	1	nessuna	nessuna	1	Tra le 7 e le 8 ore	Tra le 8 e le 9 ore	Tra le 8 e le 9 ore	No	Non ho tempo		Si		1 ora	No	Non ho tempo		Si		1 ora	No	Non ho tempo		Si		1 ora	Si	No		Si
2013-11-13 01:56:46	1	180	78	30-39	Diurno (tra le 7:00 e le 20:00)	Tra le 12:00 e le 14:00, Prima serata (tra le 18:00 et le 20:00)	da 9 a 12 ore	da 12 a 15 ore	1	282° AL TOR DES GEANTS	Tra 1 e 2 ore	23:00:00	Si	10	No	Si	No			0	2017-03-02	0/1	0	0	Tra le 6 e le 7 ore	Tra le 6 e le 7 ore	Tra le 8 e le 9 ore	No	Non posso farla (assenza di condizioni che me lo permettano)		Si		1 ORA	No	Non posso farla (assenza di condizioni che me lo permettano)		Si		1 ORA	No	Non posso farla (assenza di condizioni che me lo permettano)		Si		1 ORA	No	No		No
2013-11-13 01:59:10	2	173	63	40-49	Diurno (tra le 7:00 e le 20:00)	Varia di giorno in giorno	da 3 a 6 ore	da 6 a 9 ore	5 e più	2013	Tra 1 e 2 ore	non sto mai davanti ad uno schermo	No	20	No	Si	No			0	2	0	0	1	Tra le 5 e le 6 ore	Tra le 5 e le 6 ore	Tra le 6 e le 7 ore	No	Non ne sento il bisogno		No	Non ne sento il bisogno		No	Non ne sento il bisogno		No	Non ne sento il bisogno		No	Non ne sento il bisogno		No	Non ne sento il bisogno		Si	No		Si
2013-11-13 03:01:33	1	175	59	40-49	Diurno (tra le 7:00 e le 20:00)	Tra le 12:00 e le 14:00	Meno di 3 ore	da 6 a 9 ore	0	Ventesimo	Tra 2 e 3 ore	23:00:00	No	10	No	Si	No			0	2	0	0	0	Tra le 6 e le 7 ore	Tra le 6 e le 7 ore	Tra le 7 e le 8 ore	Si	Non ho tempo	25	Si	Non ho tempo		No	Non ho tempo		Si		30	Si	Non ho tempo		Si		40	No	No		No
2013-11-13 04:54:49	1	183	67	18- 29	Diurno (tra le 7:00 e le 20:00)	Prima serata (tra le 18:00 et le 20:00)	da 6 a 9 ore	da 12 a 15 ore	0	1° trail degli eroi (46 km) 2012 e 2013 1° Troi dei cimbri (55 km) 2012 1° Cortina trail (45 km) 2012	Meno di un’ora	22:00:00	No		No	No	No			0	0	0	0	0	Tra le 9 e le 10 ore	Tra le 9 e le 10 ore	Tra le 9 e le 10 ore	No	Non posso farla (assenza di condizioni che me lo permettano)		Si		1 ora	No	Non posso farla (assenza di condizioni che me lo permettano)		Si		1 ora	No	Non posso farla (assenza di condizioni che me lo permettano)		Si		1 ora	No			No
2013-11-13 07:10:43	1	169	68	50- 59	Diurno (tra le 7:00 e le 20:00)	Pomeriggio (tra le 14:00 et le 18:00)	da 6 a 9 ore	da 9 a 12 ore	0	ultra-trail 0	Tra 1 e 2 ore	22:00:00	No	3	No	No	No			1	1	0	0	2	Tra le 8 e le 9 ore	Tra le 8 e le 9 ore	Tra le 8 e le 9 ore	No	Non ho tempo		Si		1	No	Non ho tempo		No	Non ne sento il bisogno		No			No	Non ho tempo		No			No
2013-11-13 10:20:13	1	175	74	30-39	Diurno (tra le 7:00 e le 20:00)	La sera (dopo 20:00), Varia di giorno in giorno	da 9 a 12 ore	da 12 a 15 ore	2	Verbier-St. Bernard (110km) 2013	Tra 1 e 2 ore	23:00:00	No	4	No	No	No		nulla	0	4	1	0	0	Tra le 6 e le 7 ore	Tra le 6 e le 7 ore	Tra le 8 e le 9 ore	No	Non posso farla (assenza di condizioni che me lo permettano)		No	Non ho tempo		No	Non posso farla (assenza di condizioni che me lo permettano)		No	Non ho tempo		No	Non posso farla (assenza di condizioni che me lo permettano)		No	Non ho tempo		Si	Si	25 ore di gara, 1,30 ore di sonno	No
2013-11-13 10:37:53	1	180	76	50- 59	Diurno (tra le 7:00 e le 20:00)	Mattino (tra le 7:00 e le 12:00), Prima serata (tra le 18:00 et le 20:00)	da 3 a 6 ore	da 6 a 9 ore	1	300 ccc 2009 294 tds 2013	Tra 1 e 2 ore	23:00:00	No	10	No	No	No			0	0	1	0	2017-02-01	Tra le 6 e le 7 ore	Tra le 7 e le 8 ore	Tra le 7 e le 8 ore	No	Non ne sento il bisogno		No	Non ne sento il bisogno		No	Non ne sento il bisogno		No	Non ne sento il bisogno		Si		30 minuti	No	Non ne sento il bisogno		Si	No		No
2013-11-13 11:17:40	1	174	75	40-49	Diurno (tra le 7:00 e le 20:00)	Mattino (tra le 7:00 e le 12:00), Pomeriggio (tra le 14:00 et le 18:00), La sera (dopo 20:00)	da 3 a 6 ore	da 6 a 9 ore	1	2013 - 11ore 49 minuti	Tra 1 e 2 ore	Mezzanotte	No	13	No	No	No			0	3	0	0	3	Tra le 6 e le 7 ore	Tra le 7 e le 8 ore	Tra le 7 e le 8 ore	No	Non ne sento il bisogno		No	Non ne sento il bisogno		No	Non ne sento il bisogno		No	Non ne sento il bisogno		No	Non ne sento il bisogno		No	Non ne sento il bisogno		No			No
2013-11-13 12:23:13	2	167	60	30-39	Diurno (tra le 7:00 e le 20:00)	Tra le 12:00 e le 14:00, La sera (dopo 20:00)	da 6 a 9 ore	da 12 a 15 ore	4	2013 marathon trail lago di como 116 km5900 d+ 19h26min	Meno di un’ora	non sto mai davanti ad uno schermo	No	5	No	No	No			0	3	4	1	0	Tra le 5 e le 6 ore	Tra le 6 e le 7 ore	Tra le 6 e le 7 ore	No	Non posso farla (assenza di condizioni che me lo permettano)		Si		20 minuti	No	Non posso farla (assenza di condizioni che me lo permettano)		No	Non ho tempo	20 min	No	Non posso farla (assenza di condizioni che me lo permettano)		No	Non ho tempo		Si	No		Si
2013-11-13 12:33:29	1	178	75	40-49	Diurno (tra le 7:00 e le 20:00)	Pomeriggio (tra le 14:00 et le 18:00), Prima serata (tra le 18:00 et le 20:00)	da 6 a 9 ore	da 9 a 12 ore	3	finisher Tor des Geants 2011 147 ore	Tra 1 e 2 ore	22:00:00	No	5	No	No	No		Leggo libri	0	0	1	0	0	Tra le 6 e le 7 ore	Tra le 6 e le 7 ore	Tra le 7 e le 8 ore	No	Non ho tempo		No	Non ho tempo		No	Non ho tempo		No	Non ne sento il bisogno		No	Non ho tempo		No	Non ne sento il bisogno		Si	No		Si
2013-11-13 14:51:35	1	170	61	18- 29	Diurno (tra le 7:00 e le 20:00)	Mattino (tra le 7:00 e le 12:00), Prima serata (tra le 18:00 et le 20:00), La sera (dopo 20:00)	da 9 a 12 ore	da 12 a 15 ore	0	2013	Meno di un’ora	22:00:00	No	2	No	No	No			0	0	1	0	0	Tra le 7 e le 8 ore	Tra le 9 e le 10 ore	Tra le 9 e le 10 ore	Si	Non ne sento il bisogno	30min	Si	Non ne sento il bisogno	30min	Si	Non ne sento il bisogno	30min	Si	Non ne sento il bisogno	30min	Si	Non ne sento il bisogno	30min	Si	Non ne sento il bisogno	30min	No			No
2013-11-13 16:16:50	2	165	51	40-49	Diurno (tra le 7:00 e le 20:00)	Mattino (tra le 7:00 e le 12:00)	da 12 a 15 ore	da 12 a 15 ore	3	2013 Anche se ho vinto trail internazionali e fatto podi di 2 classificata in ultra trail italiani, a livello di prestigio internazionale direi: 3ta alla chamonix mont blanc 80km 4ta CCC	Tra 2 e 3 ore	non sto mai davanti ad uno schermo	No	5	Si	Si	Si	Sonniferi blandi		2	0	1	0	0	Tra le 6 e le 7 ore	Tra le 6 e le 7 ore	Tra le 6 e le 7 ore	No	Non ne sento il bisogno		No	Non ne sento il bisogno		No	Non ne sento il bisogno		No	Non ne sento il bisogno		No	Non ne sento il bisogno		No	Non ne sento il bisogno		Si	No		No
2013-11-14 05:44:02	1	179	79	40-49	Diurno (tra le 7:00 e le 20:00)	Mattino (tra le 7:00 e le 12:00), Pomeriggio (tra le 14:00 et le 18:00), La sera (dopo 20:00)	da 3 a 6 ore	da 6 a 9 ore	3	cromagnon 2012	Tra 1 e 2 ore	23:00:00	No	10	No	No	No			0	3	0	2	0	Tra le 6 e le 7 ore	Tra le 6 e le 7 ore	Tra le 6 e le 7 ore	No	Non ne sento il bisogno		No	Non ne sento il bisogno		No	Non ne sento il bisogno		No	Non ne sento il bisogno		No	Non ne sento il bisogno		No	Non ne sento il bisogno		No			No
2013-11-14 06:57:01	1	175	75	18- 29	Disoccupato	Varia di giorno in giorno	Più di 15 ore	Più di 15 ore	0	Nessuno	Tra 1 e 2 ore	22:00:00	No	20	No	Si	No			0	0	0	0	0	Tra le 7 e le 8 ore	Tra le 7 e le 8 ore	Tra le 7 e le 8 ore	No	Non posso farla (assenza di condizioni che me lo permettano)		Si	Non ne sento il bisogno	20 min	No	Non posso farla (assenza di condizioni che me lo permettano)		No	Non ne sento il bisogno		Si		20	No	Non ne sento il bisogno		No			No
2013-11-15 03:02:24	2	167	50	40-49	Diurno (tra le 7:00 e le 20:00)	Tra le 12:00 e le 14:00, Prima serata (tra le 18:00 et le 20:00)	Meno di 3 ore	da 6 a 9 ore	0	2a donna 2009	Meno di un’ora	23:00:00	No	5	No	No	No			0	3	0	0	0	Tra le 6 e le 7 ore	Tra le 6 e le 7 ore	Tra le 6 e le 7 ore	No	Non ne sento il bisogno		No	Non ne sento il bisogno		No	Non ne sento il bisogno		No	Non ne sento il bisogno		No	Non ne sento il bisogno		No	Non ne sento il bisogno		No			No
2013-11-15 05:33:27	1	173	60	18- 29	Diurno (tra le 7:00 e le 20:00)	La sera (dopo 20:00), Varia di giorno in giorno	da 3 a 6 ore	da 9 a 12 ore	1	2012 finisher tor des geants... ero fra gli ultimi 10!!!	Tra 1 e 2 ore	23:00:00	No	8	No	No	No			0	0	0	0	0	Tra le 6 e le 7 ore	Tra le 5 e le 6 ore	Tra le 8 e le 9 ore	No	Non ne sento il bisogno		No	Non ne sento il bisogno		No	Non ne sento il bisogno		No	Non ho tempo		No	Non ne sento il bisogno		No	Non ne sento il bisogno		Si	No		Si
2013-11-15 06:15:49	1	178	76	40-49	Diurno (tra le 7:00 e le 20:00)	Prima delle 7:00	da 6 a 9 ore	da 6 a 9 ore	2	2013	Tra 1 e 2 ore	23:00:00	Si	7	No	No	No			non fumo	5	0	0	1	Tra le 5 e le 6 ore	Tra le 6 e le 7 ore	Tra le 6 e le 7 ore	No	Non ne sento il bisogno		No	Non ne sento il bisogno		No	Non ne sento il bisogno		No	Non ne sento il bisogno		No	Non ne sento il bisogno		No	Non ne sento il bisogno		No			No
2013-11-15 12:32:51	1	181	72	18- 29	Diurno (tra le 7:00 e le 20:00)	Prima serata (tra le 18:00 et le 20:00)	Meno di 3 ore	Meno di 3 ore	2	17° 2013	Tra 1 e 2 ore	22:00:00	Si	3	No	No	No			0	2	0	0	0	Tra le 7 e le 8 ore	Tra le 7 e le 8 ore	Tra le 7 e le 8 ore	Si		30 minuti	Si		1 ora	Si		30 minuti	Si		1 ora	Si		20 minuti	Si		2 ore	Si	Si	3 ore con un bel mal di testa al risveglio	No
2013-12-12 11:17:25	1	173	71	50- 59	Diurno (tra le 7:00 e le 20:00)	Pomeriggio (tra le 14:00 et le 18:00), Prima serata (tra le 18:00 et le 20:00)	da 3 a 6 ore	da 6 a 9 ore	2	TOE 2011	Tra 1 e 2 ore	22:00:00	No	10	No	No	No			0	3	0	0	1	Tra le 6 e le 7 ore	Tra le 7 e le 8 ore	Tra le 7 e le 8 ore	No	Non ne sento il bisogno		No	Non ne sento il bisogno		No	Non ne sento il bisogno		No	Non ne sento il bisogno		No	Non ne sento il bisogno		No	Non ne sento il bisogno		Si	No		Si
2013-12-12 11:26:50	1	185	80	30-39	Diurno (tra le 7:00 e le 20:00)	Mattino (tra le 7:00 e le 12:00), Pomeriggio (tra le 14:00 et le 18:00), La sera (dopo 20:00)	da 12 a 15 ore	Più di 15 ore	5 e più	92013	Tra 1 e 2 ore	21:00:00	No		No	No	No			0	4	1	3	0	Tra le 5 e le 6 ore	Tra le 5 e le 6 ore	Tra le 5 e le 6 ore	No	Non ne sento il bisogno		No	Non ne sento il bisogno		No	Non ne sento il bisogno		No	Non ne sento il bisogno		No	Non ne sento il bisogno		No	Non ne sento il bisogno		Si	No		No
2013-12-12 11:31:03	1	175	68	40-49	Diurno (tra le 7:00 e le 20:00)	Prima delle 7:00, Prima serata (tra le 18:00 et le 20:00)	da 6 a 9 ore	da 6 a 9 ore	2	2013 Saintélyon	Tra 1 e 2 ore	21:00:00	No	5	No	No	No			0	2	0	0	1	Tra le 7 e le 8 ore	Tra le 7 e le 8 ore	Tra le 7 e le 8 ore	No	Non ne sento il bisogno		No	Non ne sento il bisogno		No	Non ne sento il bisogno		No	Non ne sento il bisogno		No	Non ne sento il bisogno		No	Non ne sento il bisogno		Si	No		No
2013-12-12 12:40:32	1	175	82	50- 59	Diurno (tra le 7:00 e le 20:00)	Prima serata (tra le 18:00 et le 20:00)	da 3 a 6 ore	da 3 a 6 ore	2	2010	Tra 1 e 2 ore	23:00:00	Si	4	No	Si	No			0	3	1	1	0	Meno di 5 ore	Tra le 5 e le 6 ore	Tra le 6 e le 7 ore	No	Non posso farla (assenza di condizioni che me lo permettano)		Si		15 minuti	No	Non ne sento il bisogno		No	Non ne sento il bisogno		No	Non ne sento il bisogno		No	Non ne sento il bisogno		Si	No		No
2013-12-12 13:22:02	1	175	63	50- 59	Diurno (tra le 7:00 e le 20:00)	Varia di giorno in giorno	da 6 a 9 ore	da 9 a 12 ore	2	CCC 2010	Tra 1 e 2 ore	21:00:00	No	10	No	No	No			0	2	1	0	2	Tra le 8 e le 9 ore	Tra le 8 e le 9 ore	Tra le 8 e le 9 ore	No	Non ne sento il bisogno		No	Non ne sento il bisogno		No	Non ne sento il bisogno		No	Non ne sento il bisogno		No	Non ne sento il bisogno		No	Non ne sento il bisogno		Si	No		Si
2013-12-13 01:16:07	1	187	75	40-49	Disoccupato	Varia di giorno in giorno	da 6 a 9 ore	da 9 a 12 ore	1	15h05' all'Ultra Trail Lago d'Orta 2013	Più di 3 ore	non sto mai davanti ad uno schermo	No	4	No	No	No			non fumo	1	0	1 lattina al giorno	0	Tra le 7 e le 8 ore	Tra le 7 e le 8 ore	Tra le 7 e le 8 ore	No	Non ne sento il bisogno		No	Non ne sento il bisogno		No	Non ne sento il bisogno		No	Non ne sento il bisogno		No	Non ne sento il bisogno		No	Non ne sento il bisogno		No			No
2013-12-13 01:23:42	1	165	62	50- 59	Diurno (tra le 7:00 e le 20:00)	Varia di giorno in giorno	da 9 a 12 ore	da 9 a 12 ore	4	19 posto,nel 2013	Tra 1 e 2 ore	non sto mai davanti ad uno schermo	No	10	No	Si	No		musica lettura	0	6	3 the verde	0	1	Tra le 6 e le 7 ore	Tra le 7 e le 8 ore	Tra le 8 e le 9 ore	Si		2 ore	Si	Non ho tempo	1 ora	Si	Non ho tempo	1 ora	Si	Non ho tempo	2 ore	Si	Non ho tempo	2 ore	Si	Non ho tempo	2 ore	Si	No		No
2013-12-13 01:49:34	1	186	74	30-39	Diurno (tra le 7:00 e le 20:00)	Prima serata (tra le 18:00 et le 20:00)	da 3 a 6 ore	da 6 a 9 ore	2	12esimo alla 100 Miles of Istria (100km) 2013	Meno di un’ora	Mai dopo 20:00	No	3	No	No	No			0	3	2	0	1	Tra le 7 e le 8 ore	Tra le 8 e le 9 ore	Tra le 8 e le 9 ore	No	Non ne sento il bisogno		No	Non ne sento il bisogno		No	Non ne sento il bisogno		No	Non ne sento il bisogno		No	Non ne sento il bisogno		No	Non ne sento il bisogno		Si	No		No
2013-12-13 01:50:33	1	183	74	30-39	Diurno (tra le 7:00 e le 20:00)	Tra le 12:00 e le 14:00, Varia di giorno in giorno	da 3 a 6 ore	da 6 a 9 ore	2	2013 UTMB	Tra 1 e 2 ore	Mezzanotte	No	4	No	No	No			0	4	0	0	1	Tra le 6 e le 7 ore	Tra le 7 e le 8 ore	Tra le 7 e le 8 ore	No	Non posso farla (assenza di condizioni che me lo permettano)		Si		30'	No	Non posso farla (assenza di condizioni che me lo permettano)		Si		30'	No	Non posso farla (assenza di condizioni che me lo permettano)		Si		60'	Si	No		Si
2013-12-13 01:54:49	1	177	63	30-39	Diurno (tra le 7:00 e le 20:00)	Mattino (tra le 7:00 e le 12:00), Tra le 12:00 e le 14:00, La sera (dopo 20:00)	da 3 a 6 ore	da 6 a 9 ore	0	79° 2013	Tra 2 e 3 ore	22:00:00	No	1	No	No	No			0	1	1	0	1	Tra le 7 e le 8 ore	Tra le 8 e le 9 ore	Tra le 8 e le 9 ore	No	Non posso farla (assenza di condizioni che me lo permettano)		Si		1 ora	No	Non posso farla (assenza di condizioni che me lo permettano)		Si		1 ora	No	Non posso farla (assenza di condizioni che me lo permettano)		Si		2 ore	No			No
2013-12-13 02:39:47	2	155	60	30-39	Diurno (tra le 7:00 e le 20:00)	Prima serata (tra le 18:00 et le 20:00)	da 6 a 9 ore	Più di 15 ore	3	2011	Tra 2 e 3 ore	23:00:00	Si		No	No	No			5	2	0	0	3	Tra le 7 e le 8 ore	Tra le 9 e le 10 ore	Tra le 9 e le 10 ore	No	Non ho tempo		Si		2	No	Non ho tempo		Si		2	No	Non ho tempo		Si		2	Si	No		No
2013-12-13 02:51:23	1	188	78	30-39	Diurno (tra le 7:00 e le 20:00)	Varia di giorno in giorno	da 3 a 6 ore	da 3 a 6 ore	4	2010	Meno di un’ora	23:00:00	No	4	No	No	No			0	3	0	0	2	Tra le 7 e le 8 ore	Tra le 8 e le 9 ore	Tra le 8 e le 9 ore	No	Non ho tempo		No	Non posso farla (assenza di condizioni che me lo permettano)		No	Non ho tempo		No	Non ho tempo		No	Non ho tempo		No	Non ho tempo		Si	No		Si
2013-12-13 03:14:30	1	168	56	50- 59	Diurno (tra le 7:00 e le 20:00)	Mattino (tra le 7:00 e le 12:00), Prima serata (tra le 18:00 et le 20:00)	da 6 a 9 ore	da 9 a 12 ore	3	2011 Marathontrail del Lago di Como 11 posizione	Tra 2 e 3 ore	Mezzanotte	No	3	No	No	No			15	4	1	0	2	Tra le 5 e le 6 ore	Tra le 5 e le 6 ore	Tra le 7 e le 8 ore	No	Non ne sento il bisogno		No	Non ne sento il bisogno		No	Non ne sento il bisogno		No	Non ne sento il bisogno		No	Non ne sento il bisogno		No	Non ne sento il bisogno		Si	No		Si
2013-12-13 07:00:29	1	174	72	40-49	Diurno (tra le 7:00 e le 20:00)	Mattino (tra le 7:00 e le 12:00), Tra le 12:00 e le 14:00	da 6 a 9 ore	da 9 a 12 ore	2	657° CCC 2013	Tra 1 e 2 ore	23:00:00	No	10	No	Si	Si	gocce a base di erbe		0	0	0	0	0	Tra le 5 e le 6 ore	Tra le 5 e le 6 ore	Tra le 6 e le 7 ore	No	Non posso farla (assenza di condizioni che me lo permettano)		Si		1 ora	No	Non ne sento il bisogno		No	Non ne sento il bisogno		No	Non ne sento il bisogno		No	Non ne sento il bisogno		Si	No		No
2013-12-13 08:47:51	2	172	61	30-39	Diurno (tra le 7:00 e le 20:00)	Prima delle 7:00, Prima serata (tra le 18:00 et le 20:00), Varia di giorno in giorno	da 6 a 9 ore	da 9 a 12 ore	1	4° posto femminile THE ABBOTS WAY	Meno di un’ora	22:00:00	No	3	No	No	No			0	1	1	0	0	Tra le 5 e le 6 ore	Tra le 7 e le 8 ore	Tra le 8 e le 9 ore	No	Non posso farla (assenza di condizioni che me lo permettano)		No	Non ne sento il bisogno		No	Non posso farla (assenza di condizioni che me lo permettano)		No	Non ne sento il bisogno		No	Non ne sento il bisogno		No	Non ne sento il bisogno		Si	No		No
2013-12-14 05:28:39	1	192	75	40-49	Diurno (tra le 7:00 e le 20:00)	Varia di giorno in giorno	da 6 a 9 ore	da 12 a 15 ore	2	Utmb 2009 539	Tra 1 e 2 ore	23:00:00	No	10	No	No	No			18	4	1	0	5	Tra le 6 e le 7 ore	Tra le 7 e le 8 ore	Tra le 7 e le 8 ore	No	Non posso farla (assenza di condizioni che me lo permettano)		No	Non posso farla (assenza di condizioni che me lo permettano)		No	Non posso farla (assenza di condizioni che me lo permettano)		No	Non posso farla (assenza di condizioni che me lo permettano)		No	Non posso farla (assenza di condizioni che me lo permettano)		No	Non posso farla (assenza di condizioni che me lo permettano)		Si	No		Si
2013-12-18 07:14:08	1	168	60	40-49	Diurno (tra le 7:00 e le 20:00)	Prima serata (tra le 18:00 et le 20:00)	da 6 a 9 ore	da 9 a 12 ore	2	3° TUSCANY CROSSING 100km (2013) 3° TRAIL DEL MALANDRINO 70 km (2013)	Tra 1 e 2 ore	23:00:00	No	6	No	No	No			0	2	0	0	0	Tra le 7 e le 8 ore	Tra le 6 e le 7 ore	Tra le 6 e le 7 ore	No	Non ne sento il bisogno		No	Non ne sento il bisogno		No	Non ne sento il bisogno		No	Non ne sento il bisogno		No	Non ne sento il bisogno		No	Non ne sento il bisogno		Si	No		No
2013-12-29 09:53:29	1	180	74	40-49	Diurno (tra le 7:00 e le 20:00)	Prima serata (tra le 18:00 et le 20:00)	da 3 a 6 ore	da 6 a 9 ore	3	2011 Abbots Way	Tra 1 e 2 ore	22:00:00	Si	10	No	No	No			0	1	0	0	1	Tra le 7 e le 8 ore	Tra le 7 e le 8 ore	Tra le 7 e le 8 ore	No	Non posso farla (assenza di condizioni che me lo permettano)		No	Non ne sento il bisogno		No	Non posso farla (assenza di condizioni che me lo permettano)		Si		1 ora	No	Non posso farla (assenza di condizioni che me lo permettano)		Si		1 ora	Si	No		No
2014-01-10 00:21:58	2	165	55	30-39	Diurno (tra le 7:00 e le 20:00)	Prima delle 7:00, La sera (dopo 20:00)	da 9 a 12 ore	da 9 a 12 ore	4	prima 100 e lode 2013 seconda LUT 2013	Meno di un’ora	21:00:00	No	uno	No	No	No			nessuna	3	4	1	1	Tra le 6 e le 7 ore	Tra le 5 e le 6 ore	Tra le 6 e le 7 ore	No	se dormo di giorno mi sento peggio		No	se dormo di giorno mi sento peggio		No	se dormo di giorno mi sento peggio		No	se dormo di giorno mi sento peggio		No	se dormo di giorno mi sento peggio		No	se dormo di giorno mi sento peggio		Si	No	partenza gara all'una di notte . 11 ore di gara e niente sonno; partenza alle dieci di sera, 25 ore di gara e niente sonno	Si
2014-02-20 21:28:31	1	186	80	30-39	Diurno (tra le 7:00 e le 20:00)	Prima serata (tra le 18:00 et le 20:00)	da 6 a 9 ore	da 9 a 12 ore	3	0	Meno di un’ora	Mai dopo 20:00	No	0	No	No	No			0	2	0	0	0	Tra le 6 e le 7 ore	Tra le 5 e le 6 ore	Tra le 5 e le 6 ore	No	Non ne sento il bisogno		No	Non ne sento il bisogno		No	Non ne sento il bisogno		No	Non ne sento il bisogno		No	Non ne sento il bisogno		No	Non ne sento il bisogno		No	No		No
2014-09-26 07:13:32	1	178	62	50- 59	A turni	Mattino (tra le 7:00 e le 12:00), Prima serata (tra le 18:00 et le 20:00)	da 6 a 9 ore	da 6 a 9 ore	1	2014	Tra 1 e 2 ore	21:00:00	No	8	No	Si	No			6	2	0	0	0	Tra le 7 e le 8 ore	Tra le 7 e le 8 ore	Tra le 7 e le 8 ore	No	Non posso farla (assenza di condizioni che me lo permettano)	1ora	Si			Si			No	Non ho tempo		No	Non ho tempo		Si		1ora	No			No
2016-04-01 08:52:18	1	174	73	50- 59	A turni	Mattino (tra le 7:00 e le 12:00)	da 9 a 12 ore	da 12 a 15 ore	3	2015 124km 5600mt D+ 21h 2015 110km 4200mt D+ 15h 2014 100km 3200mt D+ 13h	Tra 2 e 3 ore	22:00:00	No	2	No	No	No			0	1	0	0	1	Tra le 8 e le 9 ore	Più di 10 ore	Tra le 8 e le 9 ore	No	Non ne sento il bisogno		Si		1 h	Si		1 h	Si		1 h	Si		2 h	No	Non ne sento il bisogno		Si	No		No
2017-01-10 10:34:19	1	181	84	30-39	Diurno (tra le 7:00 e le 20:00)	Tra le 12:00 e le 14:00, Prima serata (tra le 18:00 et le 20:00)	da 3 a 6 ore	da 9 a 12 ore	3	2014	Tra 1 e 2 ore	Dopo la mezzanotte	No	1	No	Si	No			0	3	1	0	4	Tra le 5 e le 6 ore	Tra le 6 e le 7 ore	Tra le 7 e le 8 ore	No			Si		1 h	No			Si		1h	No			Si		1h	Si	No		No
2013-10-24 19:59:27	1	180.34	69.3855	50- 59	During the day (between 7 am and 8 pm)	In the morning (7 am -12 pm), Between 12 pm and 2 pm, In the afternoon (2 pm - 6 pm)	6 to 9	12 to 15	1	1998 100-mile trail in 18:36	< 1	22:00:00	Yes	5	No	No	No			0	1	0	0	1	Between 7 and 8	Between 7 and 8	Between 7 and 8	No	I don't have time		No	I don't have time		No	I don't have time		No	I don't have time		No	I don't have time		No			Yes	No		No
2013-11-08 11:47:29	1	176	66	30-39	During the day (between 7 am and 8 pm)	In the morning (7 am -12 pm), In the afternoon (2 pm - 6 pm)	More than 15	More than 15	3	68km with ~3000m climb in 8:06 (2012) 64km with ~3500m climb in 8:14 (2010)	Between 2 and 3	21:00:00	Yes	1	Yes	Yes	No			0	4	0	1	0	Between 8 and 9	Between 8 and 9	Between 7 and 8	No	I don't need to		Yes		30 minutes	No	I don't have time		Yes		30 minutes	No	I don't have time		No	I don't have time		No			No
2013-11-08 18:20:39	2	161	47	50- 59	Unemployed	In the morning (7 am -12 pm)	9 to 12	More than 15	0	Kepler challenge 6hr 55mins (2001)	Between 1 and 2	21:00:00	No	10	No	No	No			0	3	2	0	1	Between 7 and 8	Between 7 and 8	Between 7 and 8	No	I don't need to		No	I don't need to		No	I don't need to		No	I don't need to		No			Yes		30 mins	No			No
2013-11-08 20:39:36	1	184	80	40-49	During the day (between 7 am and 8 pm)	In the afternoon (2 pm - 6 pm), At the beginning of the evening (6 pm - 8 pm)	3 to 6	9 to 12	2	2007 Hardrock 100 44:h	Between 2 and 3	22:00:00	No	6	No	No	No			0	4	0	0	0.5 or none	Between 8 and 9	Between 8 and 9	Between 8 and 9	No	I don't have time	30 minutes	Yes		30 minutes	No	I don't have time		Yes		30 minutes	No	I don't have time		Yes		30 minutes	Yes	No	Usually not when the run is under 36h. I did two cat naps at Hardrock to finish in 44 hours.	Yes
2013-11-08 21:12:01	1	177.8	77.095	30-39	During the day (between 7 am and 8 pm)	It changes every day	9 to 12	More than 15	3	27hrs 100 mile trail in 2012	< 1	21:00:00	Yes	2	No	No	No		Think about distractions from life (movies, tv shows, etc)	None	4	0	0	0	Between 5 and 6	Between 7 and 8	Between 7 and 8	No	I don't have the opportunity		Yes		30min	No	I don't have the opportunity		Yes		1hr	No	I don't have the opportunity		Yes		1hr	Yes	No		No
2013-11-09 05:06:51	1	185	78	40-49	Shift work	In the morning (7 am -12 pm)	6 to 9	12 to 15	4	Finishing Tor des Geants 2013	Between 2 and 3	21:00:00	No	2	No	No	No			0	6	2	0	0,5	Between 7 and 8	Between 7 and 8	Between 7 and 8	No	I don't need to		No	I don't need to		No			No	I don't need to		Yes		1	No	I don't have time		Yes	Yes	During Tor des Geants we slept 2 times 2,5 hrs. De rest we did 10 miute sleeps. Alarmset on phone, head on the table and using earplugs. We did 146 hrs. Especially after those 10 minutes it was amazing how good we felt to go on again.	Yes
2013-11-09 05:25:18	2	167	65	30-39	During the day (between 7 am and 8 pm)	Before 7 am	12 to 15	More than 15	2	N/A	> 3h	Midnight	Yes	4	No	No	No			0	4	2	0	0	Between 6 and 7	Between 7 and 8	Between 6 and 7	No	I don't need to		No	I don't need to		No	I don't have the opportunity		No	I don't need to		No	I don't have the opportunity		No	I don't need to		Yes	No		No
2013-11-09 05:35:24	1	180	77	50- 59	During the day (between 7 am and 8 pm)	It changes every day	9 to 12	12 to 15	4	see link: http://statistik.d-u-v.org/getresultperson.php?runner=7459	> 3h	22:00:00	No	>10	No	No	No			0	>10	0	0	<1	Between 7 and 8	Between 8 and 9	Between 8 and 9	No	I don't need to		No	I don't need to		Yes	I don't need to		Yes	I don't need to		No			No	I don't need to		Yes	Yes	On the track. Just a nap. Sometine more than one. GGR 2010, 60 hours, 2 hours UTMF 2012 46 hours, 2 hours	Yes
2013-11-09 05:55:41	1	180	70	30-39	During the day (between 7 am and 8 pm)	In the morning (7 am -12 pm), At the beginning of the evening (6 pm - 8 pm)	12 to 15	More than 15	3	1st Kleiner Kobolt 106k 2012	Between 1 and 2	Midnight	No	7	No	Yes	No		reading	0	2017-06-04	0.5	0 (ONLY IN RACES!!)	0	Between 8 and 9	Between 8 and 9	Between 8 and 9	No	I don't need to		No	I don't need to		No	I don't need to		No	I don't need to		Yes		45MINUTES	No	I don't need to		Yes	No		Yes
2013-11-09 06:08:43	1	188	82	40-49	During the day (between 7 am and 8 pm)	At the beginning of the evening (6 pm - 8 pm)	6 to 9	12 to 15	2	80 km in 8 hours, 2011	Between 1 and 2	22:00:00	No	8?	No	No	No			0	4	8	1	1	Between 7 and 8	Between 8 and 9	Between 8 and 9	No	I don't need to		No	I don't need to		No	I don't need to		No	I don't need to		No	I don't need to		No	I don't need to		No			No
2013-11-09 08:01:10	1	180.34	70.2925	50- 59	Shift work	It changes every day	12 to 15	More than 15	5 and more	24h - 106 miles - 1999 50 mile - 8:11 (7000 ft elevation) 1999 100 mile - 25:38:00 - Leadville 100 - 1999 100 mile - 41:44:45 - Hardrock 100 - 2013	Between 2 and 3	Midnight	No	5	No	No	No	I will take a Halcion .25mg at bedtime the night before a race IF the starting time demands going to bed very early. Example - Leadville starts at 0400, I need to awaken 1.5h before start, to get 8 hours of sleep I need to go to sleep at 1830; therefore Halcion.		0	2	0	0	0	Between 7 and 8	Between 7 and 8	Between 7 and 8	No	I don't have the opportunity		Yes		12 minutes	No	I don't have the opportunity		Yes		12 minutes	No	I don't have the opportunity		Yes		12 minutes	Yes	No		Yes
2013-11-09 08:35:39	1	193.04	90.7	50- 59	During the day (between 7 am and 8 pm)	It changes every day	6 to 9	More than 15	1	2013 O24 trail run 57 miles	< 1	22:00:00	No	5	No	Yes	No			0	4	0	0	1	Between 5 and 6	Between 6 and 7	Between 6 and 7	Yes		15 minutes	Yes		15 minutes	Yes		15 minutes	Yes		15 minutes	Yes		15 minutes	Yes		15 minutes	Yes	Yes	varies... some races a few rests (light sleep) of 15-20 minutes; some races a few naps of 1-2 hours.	No
2013-11-09 09:31:13	1	175.26	72.56	50- 59	During the day (between 7 am and 8 pm)	Before 7 am, At the beginning of the evening (6 pm - 8 pm)	6 to 9	9 to 12	1	2009 9:14 50 mile 2009 23:00 85 mile	> 3h	21:00:00	Yes	8	No	Yes	No			0	2	0	1	0	Between 7 and 8	Between 7 and 8	Between 8 and 9	No	I don't need to		Yes		20 minutes	No	I don't need to		Yes		20 minutes	No	I don't have time		Yes		20 minutes	Yes	No		No
2013-11-09 11:00:14	1	170.2	75.281	30-39	During the day (between 7 am and 8 pm)	In the afternoon (2 pm - 6 pm)	9 to 12	9 to 12	4	5:32 50k	< 1	Never after 8 pm	No	5	No	No	No			0	3	0	1	0	Between 5 and 6	Between 5 and 6	Between 5 and 6	No	I don't need to		No	I don't need to		No	I don't need to		No	I don't need to		No	I don't need to		No	I don't need to		Yes	No		No
2013-11-09 11:09:27	1	183	68	40-49	Shift work	In the morning (7 am -12 pm)	6 to 9	9 to 12	2	100k road 8:24:34 100k trail 10:55:00 50k road 3:37:41	Between 1 and 2	Later than midnight	Yes	1 year ago	No	No	No			0	4	6	0	1	Between 6 and 7	Between 8 and 9	Between 7 and 8	Yes		30 minutes	Yes		30 minutes	Yes		30 minutes	Yes		1 hour	Yes		30 minutes	Yes		30 minutes	Yes	No		No
2013-11-09 11:42:25	1	180.34	77.5485	30-39	During the day (between 7 am and 8 pm)	Before 7 am, In the morning (7 am -12 pm), In the afternoon (2 pm - 6 pm)	6 to 9	9 to 12	2	2012 - 50 miles - 10:26:00	Between 2 and 3	22:00:00	Yes	6	Yes	Yes	No		Read a book	0	2	0	0	1	Between 7 and 8	Between 8 and 9	Between 8 and 9	No	I don't have the opportunity		No			No	I don't have the opportunity		No			No	I don't have the opportunity		Yes		45 minutes	No			No
2013-11-09 13:03:56	1	167.64	69.839	50- 59	During the day (between 7 am and 8 pm)	It changes every day	More than 15	More than 15	4	27:38:18 2013	> 3h	22:00:00	Yes	20	No	No	No		Reading	None	6	0	0	0	Between 8 and 9	Between 8 and 9	Between 8 and 9	Yes		30 min	Yes		1hr	Yes		30 min	Yes		1hr	Yes		30 min	Yes		1hr	Yes	No		Yes
2013-11-09 13:08:53	1	153.67	83.8975	50- 59	During the day (between 7 am and 8 pm)	At the beginning of the evening (6 pm - 8 pm)	6 to 9	9 to 12	1	Actually I've only run one trail run > 50 miles: 2012. My time was 15:57. This year I ran a road 50 mile in 10:39. I've run five trail 50K's, but you do not consider them 'ultra?'	Between 2 and 3	22:00:00	No	6?	No	Yes	No			0	3	0	0	0	Between 7 and 8	Between 7 and 8	Between 7 and 8	No	I don't need to		No	I don't need to		No	I don't need to		No	I don't need to		No	I don't need to		No	I don't need to		No			No
2013-11-09 13:22:00	1	187.96	95.235	30-39	During the day (between 7 am and 8 pm)	It changes every day	9 to 12	More than 15	3	50k 5:43 Sylamore trail 2013 50 mile 11:53 Mountain Masochist 2012 100 mile 32:54:00 CAT 100 2013	< 1	21:00:00	No	5	No	Yes	No		Reading, Gentle Yoga	0	2	0	0-1	0-1	Between 8 and 9	Between 8 and 9	Between 8 and 9	No	I don't need to		Yes		2 hours	No	I don't have time		Yes		2 hours	No	I don't have time		Yes		2 to 3 hours	Yes	No		Yes
2013-11-09 16:00:35	1	165.1	70.2925	> 60	Unemployed	In the morning (7 am -12 pm)	6 to 9	6 to 9	5 and more	1999 - 100M - 23:23:41	> 3h	21:00:00	No	6	No	Yes	No			0	1	0	1	0.75	Between 5 and 6	Between 5 and 6	Between 5 and 6	No	don't think of it		No	don't think of it		No	don't think of it		No	don't think of it		No	don't think of it		No	don't think of it		Yes	No		Yes
2013-11-09 13:59:39	2	167.64	56.234	50- 59	During the day (between 7 am and 8 pm)	Before 7 am, In the morning (7 am -12 pm), Between 12 pm and 2 pm	9 to 12	12 to 15	3	finishing Black Hills 100 - 2013 finishing Mogollon Monster 100 - 2013	Between 2 and 3	21:00:00	No	21	No	No	No			0	2017-12-10	0-1	0	0	Between 7 and 8	Between 7 and 8	Between 7 and 8	No	I don't need to		No	I don't need to		No	I don't need to		No	I don't need to		Yes		45-60'	Yes		45-60'	Yes	No		No
2013-11-09 14:09:14	2	162.56	63.49	40-49	During the day (between 7 am and 8 pm)	In the morning (7 am -12 pm), At the beginning of the evening (6 pm - 8 pm), It changes every day	12 to 15	More than 15	5 and more	2007 SOB 50K sub 6 hour finish 2012 Javelina Jundred first sub 24 hour finish 2013 Pickled Feet 100 sub 24 hour finish 2013 Naseby Great Water Race 3rd female, sub 24 hour finish	> 3h	21:00:00	Yes	0	No	No	No			0	0	3	0	0	Between 7 and 8	Between 7 and 8	Between 7 and 8	No	I don't need to		No	I don't need to		No	I don't need to		No	I don't need to		No	I don't need to		No	I don't need to		Yes	Yes	2012 Salt Flats 100 I started to get hypothermic and while waiting for a fellow runner who was a couple of hours behind me, I slept in her husband's car. I probably could have gotten away with less sleep, but I had it in my mind to wait for her. Total sleep time ~ 2 hours. Finishing time 29:41 2013 Beyond Limits Ultra ran 1+ mile laps for 45 1/2 hours. Started at noon on a Friday. Slept a handful…	Yes
2013-11-09 14:16:19	1	175.25	79.3625	40-49	During the day (between 7 am and 8 pm)	It changes every day	6 to 9	6 to 9	5 and more	Laurel highlands 2009 Hellgate 2009 Highlands sky 2009	Between 2 and 3	Later than midnight	No	21	No	No	No			None	None	1	1	None	Between 5 and 6	Between 5 and 6	< 5	No	I don't have the opportunity		No	I don't need to		No	I don't have the opportunity		Yes		1 hour	No	I don't have the opportunity		Yes		1 hour	Yes	No		Yes
2013-11-09 16:02:25	2	180	72.56	18-29	During the day (between 7 am and 8 pm)	It changes every day	6 to 9	12 to 15	5 and more	Lean Horse 100M 2012, 23:52 Transvulcania 83k 2013, 13:44	Between 1 and 2	Midnight	No	2	No	No	No			0	2	0	1	1	Between 7 and 8	Between 8 and 9	Between 8 and 9	No	I don't have time		No	I don't need to		No	I don't have time		Yes		30	No	I don't have time		Yes		45	Yes	No		Yes
2013-11-09 16:10:02	1	140.97	69.3855	> 60	During the day (between 7 am and 8 pm)	Before 7 am	9 to 12	9 to 12	3	??? really don't know.	Between 1 and 2	22:00:00	Yes	12 years ago	No	Yes	No		Counting backwards from 100. Sometimes I watch the clock and count my heartbeats/minute	never	1-2 caffeinated, 3+ decaf	none usually unless I am sick, Then 3-5	none	none	Between 6 and 7	Between 6 and 7	Between 6 and 7	No	I don't need to		No	I don't need to		No	I don't need to		Yes		1.0 hour	No	I don't need to		Yes		1	Yes	No		No
2013-11-09 16:35:25	2	175.25	64.397	> 60	Unemployed	In the morning (7 am -12 pm)	9 to 12	12 to 15	5 and more	8:20 hrs. 50 miles 1993 28:30 hrs. 100 miles 1999 82 miles/ 24 hours 2009	> 3h	22:00:00	No	< 1	No	Yes	No		dark room, white noise, warm bed & pajamas	0	1, before noon	1-2 decaf	0	none usually	Between 8 and 9	Between 8 and 9	Between 8 and 9	No	I don't need to		No	I don't need to		No	I don't need to		No	I don't need to		No	I don't need to		Yes		1 1/2 hours	Yes	No		No
2013-11-09 18:34:17	1	177.8	79.3625	50- 59	Shift work	It changes every day	6 to 9	12 to 15	3	Vulture Bait London, Ontario Oct-13-12 50 km 5:05:34	Between 1 and 2	22:00:00	Yes	4	No	Yes	No	Gravol when working nights	Lower my body temp ...no covers for the first bit. Shake my foot Think about running an Ultra ....makes me tired.	0	3	0	0.5	2	Between 6 and 7	Between 7 and 8	Between 7 and 8	No	I don't need to		No	I don't need to		No	I don't need to		No	I don't need to		No	I don't need to		No	I don't need to		Yes	No	100 Mile 27 hours no sleep 120 km 24 hours no sleep 80 km 14 hours no sleep	Yes
2013-11-09 19:59:54	1	177.8	71.1995	40-49	During the day (between 7 am and 8 pm)	Before 7 am, At the beginning of the evening (6 pm - 8 pm)	9 to 12	12 to 15	5 and more	2nd place in a 100 mile: 2013	Between 1 and 2	22:00:00	No	1	No	Yes	No			0	2	0	0	0	Between 7 and 8	Between 6 and 7	Between 7 and 8	No	I don't need to		No	I don't need to		No	I don't need to		No	I don't have the opportunity		No	I don't train heavy on work days		Yes		1 hr	Yes	No		No
2013-11-09 20:11:14	1	177.8	71.653	30-39	During the day (between 7 am and 8 pm)	It changes every day	9 to 12	12 to 15	5 and more	2013: 100 mile: 21:46	Between 1 and 2	22:00:00	No	12	Yes	No	No		natural, sometimes use Pzizz sleeping software if I have to go to sleep much earlier than usual	0	0	0	0	0	Between 7 and 8	Between 7 and 8	Between 7 and 8	Yes		30 minutes	Yes		30 minutes	Yes		30 minutes	Yes		30 minutes	Yes		30 minutes	Yes		30 minutes	Yes	No		No
2013-11-10 00:48:18	2	169	68	30-39	During the day (between 7 am and 8 pm)	In the afternoon (2 pm - 6 pm)	9 to 12	12 to 15	0	Kepler challenge 2002	Between 2 and 3	21:00:00	Yes	18	Yes	Yes	Yes	Doxepin		0	0	0	4	0	Between 7 and 8	Between 7 and 8	Between 7 and 8	No	I don't need to		No	I don't need to		No	I don't have time		No	I don't need to		No	I don't have time		No	I don't have time		No			No
2013-11-10 01:10:08	2	160	50	40-49	During the day (between 7 am and 8 pm)	It changes every day	9 to 12	12 to 15	4	204km World 24hr race Steenbergen 2013	Between 1 and 2	21:00:00	No	10	No	No	No			0	2017-02-01	0	0	0	Between 7 and 8	Between 8 and 9	Between 7 and 8	No	I don't need to		No	I don't need to		No	I don't need to		Yes		1hr	No	I don't have time		Yes		1hr	Yes	No		Yes
2013-11-10 01:20:43	1	190	80	40-49	During the day (between 7 am and 8 pm)	Before 7 am	6 to 9	9 to 12	5 and more	2009 Molesworth 85km 2nd masters, 4th overall	Between 2 and 3	22:00:00	No	15	Yes	No	No		Read book, play iPhone game.	0	4	0	0	0	Between 6 and 7	Between 6 and 7	Between 7 and 8	No	I don't need to		No	I don't need to		No	I don't have the opportunity		Yes		30mins	No	I don't need to		Yes		30	No			No
2013-11-10 01:52:03	1	180	78	40-49	During the day (between 7 am and 8 pm)	In the morning (7 am -12 pm)	6 to 9	6 to 9	1	Beating 25% of the Kepler Challenge field just by walking, 2010	Between 1 and 2	22:00:00	No	?	Yes	No	No			0	2017-02-01	4	0-1	0	Between 7 and 8	Between 7 and 8	Between 7 and 8	No	I don't need to		No	I don't need to		No	I don't need to		No	I don't need to		No	I don't need to		No	I don't need to		Yes	Yes	Race was a 24 hour trail event. Slept in back of car for 4 hours 2am-6am. Temp was at freezing.	No
2013-11-10 01:54:41	2		80	40-49	During the day (between 7 am and 8 pm)	In the morning (7 am -12 pm)	9 to 12	More than 15	2	2 x podium finishes for 12 hour ultra marathons 2011 (3rd), and 2012 (1st).	Between 1 and 2	21:00:00	No	5	No	No	No			0	2	4	0	0	Between 8 and 9	Between 8 and 9	Between 8 and 9	No	wake up feeling worse so dont do it!		No	I don't need to		No	I don't need to		No	I don't need to		No	as above - if I do I feel worse off for it so dont.		No			No			No
2013-11-10 02:20:03	1	168	69	18-29	During the day (between 7 am and 8 pm)	In the morning (7 am -12 pm), At the beginning of the evening (6 pm - 8 pm)	6 to 9	9 to 12	2	9hrs44mins for 50miles	Between 2 and 3	21:00:00	No	1	No	Yes	No			0	3	0	2	0	Between 6 and 7	Between 7 and 8	Between 7 and 8	No	I don't need to		No	I don't need to		No	I don't have time		No	I don't need to		No	I don't have time		Yes		1hour	No			No
2013-11-10 07:01:54	1	182.88	72.56	40-49	During the day (between 7 am and 8 pm)	Before 7 am	6 to 9	9 to 12	5 and more	50m - 7 hrs 11 min 100m - 22 hrs	< 1	Never after 8 pm	Yes	5	No	No	No			0	2	0	0	<1	Between 8 and 9	Between 8 and 9	Between 8 and 9	No	I don't have time		No	I don't have time		No	I don't have time		No	I don't have time		No	I don't have time		No	I don't have the opportunity		Yes	No		No
2013-11-10 11:25:42	1	181	68	40-49	During the day (between 7 am and 8 pm)	In the morning (7 am -12 pm), At the beginning of the evening (6 pm - 8 pm)	9 to 12	More than 15	1	Limburgs zwaarste, 60 km	Between 1 and 2	21:00:00	No	10	No	Yes	No			0	6	2	1	1	Between 7 and 8	Between 7 and 8	Between 8 and 9	No	I don't have time		Yes		1 hour	No	I don't have time		Yes		1 hour	Yes		1 hour	Yes		1 hour	Yes	No		No
2013-11-10 13:42:55	2	160.02	53.513	50- 59	During the day (between 7 am and 8 pm)	Before 7 am, In the afternoon (2 pm - 6 pm), At the beginning of the evening (6 pm - 8 pm)	6 to 9	12 to 15	2	This is my first year at the ultra. Time 14:16 at Prarie Spirit in Kansas. Next one, this coming week.	Between 1 and 2	21:00:00	No	1.5	No	No	No			0	0	2	0	1	Between 7 and 8	Between 7 and 8	Between 8 and 9	No	I don't need to		No	I don't need to		No	I don't need to		Yes		30 minutes	No	I don't have the opportunity		Yes		30 minutes	No			No
2013-11-10 13:58:38	1	172.72	65.7575	> 60	During the day (between 7 am and 8 pm)	Before 7 am	6 to 9	6 to 9	1	2010, 100M in 27:09	> 3h	21:00:00	No	12	No	No	No			0	2	0	0	2	Between 7 and 8	Between 7 and 8	Between 7 and 8	Yes		15 minutes	Yes		15 minutes	Yes		15 minutes	Yes		15 minutes	Yes		15 minutes	Yes		30 minutes	Yes	No		No
2013-11-10 14:03:21	2	168	61	30-39	During the day (between 7 am and 8 pm)	Before 7 am, In the afternoon (2 pm - 6 pm)	6 to 9	9 to 12	4	50k 5:22 (2004) 50m 10:59 (2004) 100m 26:14 (2013)	Between 2 and 3	21:00:00	No	12	No	Yes	No			0	2017-03-02	0	0	0	Between 7 and 8	Between 8 and 9	Between 8 and 9	No	I don't need to		No	I don't need to		No	tired after nap		No	I don't need to		No	I don't have time		No	I don't have time		Yes	No		Yes
2013-11-10 15:17:27	1	182.88	73.467	40-49	During the day (between 7 am and 8 pm)	At the beginning of the evening (6 pm - 8 pm)	9 to 12	12 to 15	2	1st Male Team Lakeland 50 2012 July 64th Tor des Geants Sept 2012 1st Mixed team sept 2012 rab mm	Between 1 and 2	21:00:00	No	5	No	No	No			0	8	5	1	0	Between 7 and 8	Between 7 and 8	Between 8 and 9	No	I don't need to		No	I don't need to		No	I don't need to		No	I don't need to		No	I don't have the opportunity		No	I don't need to		Yes	Yes	30mins to 1 hour depending on location (Tor des Geants). I think time was 108 hours and time spent sleeping was around 9to 10 hours total.	Yes
2013-11-10 18:05:13	1	172.72	72.56	30-39	During the day (between 7 am and 8 pm)	In the morning (7 am -12 pm), At the beginning of the evening (6 pm - 8 pm)	3 to 6	9 to 12	4	Tahoe Rim Trail 100 - 34 hours Miwok 100k - 14 hours Dick Collins 50m - 10: 40	Between 2 and 3	22:00:00	No	4	No	No	No			0	3	0	0	3	Between 7 and 8	Between 8 and 9	Between 6 and 7	No	I don't have the opportunity		Yes	occasonally only	1.5 hour	No	I don't have the opportunity		No	I don't have the opportunity		No	I don't have the opportunity		Yes	only occasionally	1.5 hour	Yes	Yes	Total race time 34 hours. Slept 20 minutes @ approx 22 hours after race start @ 2 hours before dawn. Slept at side of trail in an open area, not at aid station.	No
2013-11-10 19:05:28	1	181	85	40-49	During the day (between 7 am and 8 pm)	In the morning (7 am -12 pm), Between 12 pm and 2 pm, In the afternoon (2 pm - 6 pm)	More than 15	More than 15	3	Great Naseby Water Race 2013 25hours Northburn 100 2013 36 hours Taranaki Round the Mount (100mile) 20 hours	> 3h	22:00:00	No	12	No	Yes	No		listening to Podcasts about trail running reading	0	2	0	1	1	Between 7 and 8	Between 7 and 8	Between 7 and 8	Yes		1 hour	Yes		1 hour	Yes		1 hour	Yes		1 hour	Yes		1 hour	Yes		1 hour	Yes	No		No
2013-11-10 20:56:37	2	162.56	61.2225	30-39	During the day (between 7 am and 8 pm)	In the afternoon (2 pm - 6 pm)	6 to 9	12 to 15	5 and more	Hardrock 100 2013 41:25:59 (not my fastest 100, but I'm proud of this one) Western States 100 2012 27:44:13	Between 1 and 2	22:00:00	No	3	No	No	No			0	1	1	0	0	Between 7 and 8	Between 8 and 9	Between 8 and 9	No	I don't have time		No	I don't need to		No	I don't have time		No	I don't need to		No	I don't have time		No	I don't have the opportunity		Yes	No		Yes
2013-11-10 23:51:00	2	165.1	70.746	50- 59	During the day (between 7 am and 8 pm)	Before 7 am, At the beginning of the evening (6 pm - 8 pm)	9 to 12	12 to 15	0	2009	< 1	21:00:00	No	6	No	Yes	No			0	0	0	1	0	Between 7 and 8	Between 9 and 10	Between 9 and 10	No	I don't have the opportunity		No	I don't have the opportunity		No	I don't have the opportunity		No	I don't have the opportunity		No	I don't have the opportunity		No	I don't have the opportunity		No			No
2013-11-11 00:04:51	2	163	55	18-29	During the day (between 7 am and 8 pm)	At the beginning of the evening (6 pm - 8 pm)	9 to 12	More than 15	2	2nd place, 2011	< 1	21:00:00	No	5	No	No	No			0	2	0	2	0	Between 7 and 8	Between 7 and 8	Between 7 and 8	Yes		30min	No	I don't need to		No	I don't need to		No	I don't need to		No	I don't need to		No	I don't need to		No			No
2013-11-11 03:43:21	1	180	86	40-49	During the day (between 7 am and 8 pm)	In the afternoon (2 pm - 6 pm), At the beginning of the evening (6 pm - 8 pm)	9 to 12	9 to 12	4	2113 50 miles SDW50, 11hrs 20 mins	> 3h	22:00:00	Yes	5	No	Yes	No			0	5	1	2	6	Between 7 and 8	Between 8 and 9	Between 8 and 9	No	I don't need to		No	I don't need to		No	I don't need to		No	I don't need to		Yes		30mins	No	I don't need to		No			No
2013-11-11 05:26:15	1	162	61	40-49	During the day (between 7 am and 8 pm)	In the afternoon (2 pm - 6 pm)	12 to 15	12 to 15	0	Comrades 2012 - 6:24 Washie 2012 100 Mile - 13:07:05 24H Track Race 2013 - 253km	Between 1 and 2	21:00:00	No	10	No	Yes	Yes	3 sleeping tablets at once: Trepiline Brazepam Zopidem	Done	None	2	1	1	2	Between 6 and 7	Between 5 and 6	Between 5 and 6	No	I don't need to		No	I don't need to		No	I don't need to		No	I don't need to		No	I don't need to		No	I don't need to		No			Yes
2013-11-11 06:42:57	1	195	81	30-39	During the day (between 7 am and 8 pm)	In the morning (7 am -12 pm), At the beginning of the evening (6 pm - 8 pm)	3 to 6	9 to 12	1	60km in 06.59 hrs in 2013	Between 1 and 2	22:00:00	No	3	No	No	No			0	4	3	0	0	Between 8 and 9	Between 8 and 9	Between 8 and 9	No	I don't need to		No	I don't need to		No	I don't need to		No	I don't need to		No	I don't need to		No	I don't need to		No			No
2013-11-11 06:58:57	1	175.26	73.0135	40-49	During the day (between 7 am and 8 pm)	Before 7 am	9 to 12	12 to 15	2	7th place in 50 miler 9th in endurance trail duathlon	Between 2 and 3	21:00:00	No	5	No	No	No			0	2	1	0	1	Between 6 and 7	Between 6 and 7	Between 6 and 7	No	I don't need to		No	I don't need to		No	I don't need to		No	I don't need to		No	I don't have time		No	I don't have time		Yes	No		No
2013-11-11 10:30:57	2	172.7	64.8505	40-49	During the day (between 7 am and 8 pm)	Between 12 pm and 2 pm, In the afternoon (2 pm - 6 pm)	6 to 9	9 to 12	1	2011 50M 10:16 3-day stage race 2009, marathon-50k/day, but not sure if that counts.	Between 2 and 3	Never after 8 pm	No	9	No	Yes	No			0	2	0	0	1	Between 8 and 9	Between 9 and 10	Between 9 and 10	No	I don't need to		No	I don't need to		Yes		30 minutes	No	I don't need to		Yes		30 minutes	Yes		30 minutes	Yes	No		No
2013-11-11 09:04:39	1	142.24	58.955	50- 59	Shift work	In the morning (7 am -12 pm), In the afternoon (2 pm - 6 pm)	6 to 9	9 to 12	2	4th- Laurel Highland 50K- 2013	Between 2 and 3	22:00:00	No	5	No	Yes	No			0	1	0	0	0	Between 7 and 8	Between 7 and 8	Between 8 and 9	No	I don't need to		No	I don't need to		No	I don't need to		No	I don't need to		No	I don't need to		No	I don't need to		No			No
2013-11-11 12:13:58	2	173.99	65.7575	30-39	During the day (between 7 am and 8 pm)	Before 7 am, At the beginning of the evening (6 pm - 8 pm)	12 to 15	More than 15	5 and more	238 km in 48 hours (2013) 100 miles in 21:30 (2012)	Between 1 and 2	22:00:00	Yes	8	No	No	No			0	2 (decaf)	0	0	0	Between 6 and 7	Between 6 and 7	Between 7 and 8	No	I don't need to		No	I don't need to		No	I don't have the opportunity		Yes		1 hour	No	I don't have the opportunity		Yes		1 hour	Yes	No		Yes
2013-11-11 14:09:31	1	177.8	68.025	> 60	During the day (between 7 am and 8 pm)	It changes every day	9 to 12	12 to 15	2	41 miles in a 6-hour race, July, 2013 56 miles in a 12-hour race, Sep 2013 113 miles in a 24-hour race, Sep 2013 20hrs 13min for a 103 mile race, Apr 2013 4hrs 26 min for a 50K, Dec 2011 8hrs 32 min for a 50 mile, Nov 2010	> 3h	Later than midnight	No	more than 10	No	No	No			0	2 to 3	0	0	2 to 5	Between 7 and 8	Between 7 and 8	Between 7 and 8	No	All of the above.		No	I don't need to		No	All of the above.		No	I don't need to		No	All of the above		Yes		30 to 60 minutes, but not always	Yes	No		No
2013-11-11 19:10:41	1	182.88	69.3855	50- 59	During the day (between 7 am and 8 pm)	In the morning (7 am -12 pm)	9 to 12	9 to 12	5 and more	Ancient Oaks 100, 22:47, 2002 Hardrock 100, 42:17, 2000	> 3h	21:00:00	No	20	No	No	No			0	0	0	0	0	Between 8 and 9	Between 7 and 8	Between 8 and 9	No	I don't need to		No	I don't need to		No	I don't need to		No	I don't need to		No	I don't need to		No	I don't need to		Yes	No		Yes
2013-11-11 20:00:33	1	175.26	64.8505	30-39	During the day (between 7 am and 8 pm)	It changes every day	6 to 9	9 to 12	1	4:18 50k - 2013, 7:49 50m - 2011, 17:44:37 100m - 2013.	> 3h	Midnight	Yes	2	No	Yes	No		Deep breathing, cover my head with pillow, quite room.	0	2	0	0	2	Between 6 and 7	Between 7 and 8	Between 7 and 8	No	I don't need to		Yes		1hr	No	I don't have time		No	I don't have time		No	I don't have time		Yes			Yes	No		No
2013-11-12 06:06:49	1	183	63.0365	40-49	Shift work	It changes every day	9 to 12	More than 15	0	None	Between 1 and 2	21:00:00	No	7	No	Yes	No		Happy thoughts	0	2	2	1	1	Between 6 and 7	Between 6 and 7	Between 6 and 7	No	I don't need to		No	I don't need to		No	I don't need to		No	I don't need to		No	I don't need to		No	I don't need to		Yes	No		No
2013-11-12 06:52:32	1	188	77	40-49	During the day (between 7 am and 8 pm)	At the beginning of the evening (6 pm - 8 pm)	9 to 12	12 to 15	3	2nd Bear Trail, 57km 2013 56th Sur les Traces des Ducs de Savoie (TDS), 120km, 2013 5th Trail de Peñalara, 80 km, 2013	Between 1 and 2	22:00:00	No	1	No	No	No		music	0	7	0	0	1	Between 8 and 9	Between 8 and 9	Between 9 and 10	No	I don't need to		No	I don't need to		No	I don't need to		No	I don't need to		No	I don't need to		Yes		1.5h	Yes	No		No
2013-11-12 09:46:16	1	182.8	74.8275	18-29	During the day (between 7 am and 8 pm)	In the morning (7 am -12 pm), In the afternoon (2 pm - 6 pm), It changes every day	12 to 15	More than 15	5 and more	In time? In my opinion? In experience? 2013 (only year included): Banff Triple FKT (70km) (2013) 1st and CR at Fat Dog 100, 70 mile (2013) 1st and CR at TransRockies Canadian Rockies Heli Run (2013) 1st team at Canadian Death Race, 1st leg fastest time, 5th leg second fastest time (2013) 2nd at Mt. Robson Marathon (46km) (2013) 4th at Mt. Spokane 50km (2013) 6th at Yakima Skyline Rim 50km (2013)	Between 1 and 2	Midnight	No	8	No	No	No	None		0	2017-02-01	0	0-1 (depends on activity and blood sugar as I have type-I diabetes and sometimes use soda/juice to correct low blood sugar)	0	Between 7 and 8	Between 7 and 8	Between 7 and 8	No	A combination of all the above	0	No	A combination of all the above	0	No	A combination of all the above	0	No	A combination of all the above	0	No	A combination of all the above		No	A combination of all the above	0	Yes	No		No
2013-11-12 10:21:08	2	167.64	56.6875	30-39	During the day (between 7 am and 8 pm)	In the morning (7 am -12 pm)	9 to 12	More than 15	3	26:46 at Leadville 100 ,2012	< 1	21:00:00	Yes	8	No	No	No			0	0	0	2	0	Between 7 and 8	Between 8 and 9	Between 9 and 10	No	I don't need to		No	I don't need to		Yes		15 min	Yes		30 min	Yes		15 min	Yes		30 min	Yes	No		No
2013-11-12 10:45:19	2	175.26	68.932	50- 59	During the day (between 7 am and 8 pm)	Before 7 am, In the morning (7 am -12 pm)	12 to 15	More than 15	4	many top 3 age group or top few women. Mostly several years ago when i was younger and ultras were smaller and a bit less competitive. Currently typically place in the top half at most distances	Between 1 and 2	21:00:00	No	3	No	No	No			0	3	0	0	0-2	Between 7 and 8	Between 7 and 8	Between 7 and 8	Yes		20 mins	No	I don't need to		No	I don't need to		No			Yes		20 mins	Yes		1 hour	Yes	No		No
2013-11-12 10:55:35	1	180	84	40-49	During the day (between 7 am and 8 pm)	In the afternoon (2 pm - 6 pm), At the beginning of the evening (6 pm - 8 pm)	6 to 9	9 to 12	1	Jan knippenberg memorial 50miles 2010 Eco-trail Brussels 2012 and 2013	Between 2 and 3	Midnight	Yes	6	No	No	No			0	4	6	1	1	Between 7 and 8	Between 8 and 9	Between 8 and 9	No	I don't need to		No	I don't need to		No	I don't need to		Yes		30 minutes	Yes		30 minutes	Yes		30 minutes	Yes	No		No
2013-11-12 11:28:39	1	177.8	68.025	50- 59	During the day (between 7 am and 8 pm)	Before 7 am	6 to 9	9 to 12	3	21 hours 100 miles, 2011	< 1	Never after 8 pm	No	3	No	No	No			0	4	2	0	1	Between 6 and 7	Between 6 and 7	Between 7 and 8	Yes		30 minutes	No	I don't need to		No	I don't need to		No	I don't need to		Yes		1 hour	No	I don't need to		Yes	No		Yes
2013-11-12 11:29:56	2	152.4	44.443	50- 59	During the day (between 7 am and 8 pm)	In the morning (7 am -12 pm)	12 to 15	12 to 15	0	Pikes Peak Marathon 4 x; 28 miler in the 90s.	> 3h	21:00:00	No	two days ago!	No	No	No		music meditative sometimes. don't usually have sleep issues, but sometimes when I am stressed, or busy.	0	0	0 (caffeine free tea)	0	1	Between 7 and 8	Between 7 and 8	Between 8 and 9	Yes		20 minutes to 1hour	Yes			Yes			Yes			Yes			Yes			No	Yes	I have crewed though.	No
2013-11-12 13:00:12	1	180.34	89.793	50- 59	During the day (between 7 am and 8 pm)	In the morning (7 am -12 pm), At the beginning of the evening (6 pm - 8 pm), It changes every day	6 to 9	6 to 9	2	100M 23:17:52 in 2009 100K 19:01:20 in 2013 50M 8:58:03 in 2007	Between 1 and 2	21:00:00	No	4	No	Yes	No			0	1	0	0	0	Between 7 and 8	Between 7 and 8	Between 8 and 9	No	I don't need to		No	I don't need to		No	I don't need to		No	I don't need to		No	I don't need to		No	I don't need to		Yes	No		No
2013-11-12 12:15:34	1	180.33	73.9205	40-49	During the day (between 7 am and 8 pm)	At the beginning of the evening (6 pm - 8 pm)	12 to 15	More than 15	3	70 mile/13,000ft. - 2013 in under 20 hours	Between 2 and 3	Midnight	No	2	No	Yes	No		Mediation Breathing exercises	0	3	0	0	1 every few days	Between 7 and 8	Between 8 and 9	Between 7 and 8	No	I don't need to		No	I don't need to		No	I don't need to		No	I don't need to		No	I don't need to		No	I don't need to		No			No
2013-11-12 12:20:35	1	167.64	81.63	50- 59	During the day (between 7 am and 8 pm)	It changes every day	More than 15	More than 15	1	50 Km: 8 hours 50 Mile: 12 hours	Between 2 and 3	22:00:00	Yes	5	No	Yes	No			0	2	4	1	1	Between 7 and 8	Between 8 and 9	Between 8 and 9	No	I don't have the opportunity		No	I don't need to		No	I don't need to		No	I don't need to		No	I don't have the opportunity		Yes		1-2 hours	No			No
2013-11-12 12:30:57	2	167.64	53.513	30-39	During the day (between 7 am and 8 pm)	It changes every day	9 to 12	12 to 15	5 and more	8:41 50 mile 2013 4:42 50k 2013	< 1	21:00:00	Yes	5	No	No	No		I close my eyes	0	2	0	0	0	Between 7 and 8	Between 7 and 8	Between 8 and 9	No	I don't have time		No	I don't have time		No	I don't have time		Yes		45 minutes	No	I don't have time		Yes		45 min	No	No		No
2013-11-12 12:37:22	1	198.12	132.422	30-39	During the day (between 7 am and 8 pm)	Before 7 am, Between 12 pm and 2 pm, At the beginning of the evening (6 pm - 8 pm)	6 to 9	12 to 15	2	Umstead 2012, 50 miles, 11:47 Umstead 2012, 100 miles, 28:39	> 3h	22:00:00	No	5	No	No	No			0	5	0	0	0.1	Between 7 and 8	Between 7 and 8	Between 7 and 8	No	Unable to fall asleep		No	Unable to fall asleep		No	Unable to fall asleep		No	Unable to fall asleep		No	Unable to fall asleep		No	Unable to fall asleep		Yes	No		No
2013-11-12 12:37:59	1	180	61.2225	18-29	During the day (between 7 am and 8 pm)	In the afternoon (2 pm - 6 pm)	12 to 15	More than 15	0	k	> 3h	22:00:00	No	2	No	Yes	No			0	0	0	0	0	Between 9 and 10	Between 5 and 6	Between 9 and 10	No	I don't need to		No	I don't need to		No	I don't need to		No	I don't need to		No	I don't need to		No	I don't need to		No			No
2013-11-12 12:42:39	2	175.25	68.025	30-39	During the day (between 7 am and 8 pm)	Before 7 am, In the morning (7 am -12 pm), At the beginning of the evening (6 pm - 8 pm)	More than 15	More than 15	2	Wild Hare 50 mile, 2011 - 5th overall female (I believe, no time to check stats right now as I am at work and trying to complete this quickly)	> 3h	22:00:00	No	2	No	No	No			0	0	0	2	0	< 5	Between 6 and 7	Between 6 and 7	No	I don't have the opportunity		No	I don't have the opportunity		No	I don't have the opportunity		No	I don't have the opportunity		No	I don't have the opportunity		No	I don't have the opportunity		Yes	No		No
2013-11-12 13:10:58	2	160.02	65.7575	40-49	During the day (between 7 am and 8 pm)	In the afternoon (2 pm - 6 pm)	9 to 12	9 to 12	2	Silver Rush 2012	Between 2 and 3	21:00:00	No	1	No	Yes	Yes	Ocassionally ambien	shower before bed	0	2017-03-02	0	0	1	Between 7 and 8	Between 7 and 8	Between 7 and 8	Yes		45 min	Yes		45 min	No	I don't have the opportunity	45 min	No	I don't need to		Yes		45 min	No	I don't need to		No			No
2013-11-12 13:12:22	1	185.42	85.258	30-39	During the day (between 7 am and 8 pm)	Before 7 am, In the morning (7 am -12 pm)	6 to 9	9 to 12	1	Sub 13 hours for a 100k - 2013	Between 2 and 3	22:00:00	Yes	5	No	No	No			0	0	0	1	0	Between 6 and 7	Between 7 and 8	Between 7 and 8	No	I don't have time		No	I don't have time		No	I don't have time		No	I don't have time		No	I don't have time		No	I don't have time		Yes	No		No
2013-11-12 13:59:23	2	185.42	74.8275	40-49	During the day (between 7 am and 8 pm)	It changes every day	9 to 12	More than 15	3	2013 11:36 (50M)	Between 1 and 2	22:00:00	No	8	Yes	Yes	No			0	2	1	0	3	Between 8 and 9	Between 7 and 8	Between 9 and 10	No	screws up my nighttime sleep		No	I don't need to		No	screws up nighttime		Yes		2 hours	No	I don't have time		Yes		2 hours	No			No
2013-11-12 14:18:06	2	170.18	57.5945	40-49	Unemployed	In the morning (7 am -12 pm)	9 to 12	9 to 12	0	2012 kalhaven ultra 33.5 miles 5:25	Between 2 and 3	21:00:00	No	12	No	Yes	No		Foot and and reflexology from husband and magnesium and calcium before bed	0	0	0	0	0	Between 8 and 9	Between 9 and 10	Between 8 and 9	No	I don't need to		No	I don't need to		No	I don't need to		No	I don't need to		No	I don't need to		No	I don't need to		No			No
2013-11-12 14:33:10	2	170.18	58.048	30-39	During the day (between 7 am and 8 pm)	It changes every day	12 to 15	More than 15	5 and more	50k - 5:00 (2012) 50M - 9:19 (2012) 100M - 23:30 (2013)	Between 1 and 2	Never after 8 pm	No	6	No	Yes	No			0	2017-04-02	0	0	1	Between 9 and 10	Between 9 and 10	Between 9 and 10	No	I don't need to		No	I don't need to		No	I don't need to		No	I don't need to		No	I don't need to		No	I don't need to		Yes	No		No
2013-11-12 15:26:56	2	165.1	56.6875	30-39	During the day (between 7 am and 8 pm)	Before 7 am, In the morning (7 am -12 pm)	9 to 12	More than 15	3	All pre kid so pre 2008 2005-6 in 50k, 13.1 2002 50 mi	Between 1 and 2	22:00:00	No	1	No	No	No			0	2	1	0	0	Between 7 and 8	Between 7 and 8	Between 7 and 8	No	Don't like naps		No	I don't need to		No	I don't need to		No	I don't need to		No	I don't need to		No	I don't need to		Yes	No		No
2013-11-12 16:18:29	1	186	92	> 60	Shift work	It changes every day	6 to 9	9 to 12	2	80 km - 2nd overall 100 km - 1st overall	Between 2 and 3	22:00:00	No	3	No	Yes	No		Read until drowsy	0	8	0	2	0	Between 5 and 6	Between 5 and 6	Between 5 and 6	Yes		15 minutes	Yes		15 minutes	Yes			Yes		15 minutes	Yes			Yes		15 minutes	Yes	No		No
2013-11-12 18:08:56	1	200.66	74.8275	50- 59	During the day (between 7 am and 8 pm)	In the afternoon (2 pm - 6 pm)	12 to 15	12 to 15	5 and more	2013 land between the lakes 50 miles 8:27 2013 indiana trails 100 miles 23 :12	Between 2 and 3	22:00:00	Yes	6	No	Yes	No			0	4	0	0	0	Between 7 and 8	Between 7 and 8	Between 7 and 8	Yes		20 min	Yes		20 min	No	I don't have the opportunity		Yes		1 hour	No	I don't have the opportunity		Yes		1 hour	Yes	No		No
2013-11-12 18:31:21	1	177.8	81.63	50- 59	During the day (between 7 am and 8 pm)	At the beginning of the evening (6 pm - 8 pm)	6 to 9	12 to 15	3	Age group winner.	< 1	22:00:00	Yes	1	Yes	Yes	No			0	2	0	0	0	< 5	< 5	< 5	No	I don't have the opportunity		Yes		1 hour	No	I don't have the opportunity		Yes		1	No	I don't have the opportunity		Yes		2	No			No
2013-11-12 18:41:16	1	187.96	77.095	50- 59	During the day (between 7 am and 8 pm)	Before 7 am, At the beginning of the evening (6 pm - 8 pm)	6 to 9	12 to 15	1	Bear 2011 Hardrock 2012 UTMB 2013	Between 1 and 2	Midnight	No		No	No	No			0	1	0	0	0	Between 6 and 7	Between 6 and 7	Between 6 and 7	No	I don't have time		No	I don't need to		No	I don't have the opportunity		No	I don't need to		No	I don't have the opportunity		No	I don't need to		Yes	No		Yes
2013-11-12 19:43:02	1	187.96	79.3625	40-49	During the day (between 7 am and 8 pm)	At the beginning of the evening (6 pm - 8 pm)	3 to 6	6 to 9	3	10:57 in 50 mile	> 3h	22:00:00	No	10	No	No	No			0	2	1	0	1	Between 8 and 9	Between 7 and 8	Between 7 and 8	Yes			No	I don't need to		Yes			Yes			Yes			Yes			Yes	No		No
2013-11-12 23:27:47	1	180.34	83.8975	40-49	Unemployed	In the morning (7 am -12 pm), Between 12 pm and 2 pm, In the afternoon (2 pm - 6 pm)	6 to 9	9 to 12	3	10 hrs 45 min PCT 50 2010 11 hrs 47 min Silver Rush 50 2013	> 3h	22:00:00	Yes	4	No	Yes	No			0	3	3	0	0	Between 7 and 8	Between 8 and 9	Between 8 and 9	No	I don't need to		No	I don't need to		No	I don't need to		No	I don't need to		No	I don't need to		No	I don't need to		Yes	No		No
2013-11-13 00:17:41	1	187.96	81.63	40-49	During the day (between 7 am and 8 pm)	It changes every day	9 to 12	More than 15	2	Mt Si 50 mile 6:37 2009 White river 50 mile 8:12. 2004?	Between 1 and 2	21:00:00	No	9	No	No	No		Soft music	0	2017-02-01	0	0	1	Between 8 and 9	Between 8 and 9	Between 8 and 9	No	I don't have the opportunity		No	I don't have the opportunity		No	I don't have the opportunity		No	I don't have the opportunity		No	I don't have the opportunity		No	I don't have the opportunity		Yes	No		No
2013-11-13 05:50:05	1	179	69	40-49	During the day (between 7 am and 8 pm)	Before 7 am, In the morning (7 am -12 pm)	6 to 9	9 to 12	2	Tor des Geants 2010 and 2013; 141 hrs and 145 hrs Tour Oisins et Ecrins 2011; 60 hrs Verbier St. Bernard Boucle 2011; don't remember time Biel 100km 2013; 11:50 hrs and so on ...	Between 1 and 2	22:00:00	No	1	No	No	No			0	1	0	0	0	Between 6 and 7	Between 7 and 8	Between 7 and 8	No	I don't need to		No	I don't need to		No	I don't need to		No	I don't need to		No	I don't have time		No	I don't need to		Yes	No		Yes
2013-11-13 07:17:26	1	177.8	77.095	50- 59	During the day (between 7 am and 8 pm)	In the morning (7 am -12 pm)	9 to 12	More than 15	1	I finish	< 1	Never after 8 pm	Yes	2	No	No	No			0	6	0	0	1	Between 7 and 8	Between 7 and 8	Between 7 and 8	No	I don't need to		No	I don't need to		No	I don't need to		No	I don't need to		No	I don't need to		No	I don't need to		No			No
2013-11-13 10:24:10	2	160.02	61.2225	40-49	During the day (between 7 am and 8 pm)	In the afternoon (2 pm - 6 pm)	6 to 9	12 to 15	2	2009	Between 1 and 2	Never after 8 pm	No	5	No	Yes	No			0	3 decaf	0	0	0	Between 5 and 6	Between 6 and 7	Between 5 and 6	No	I don't have time		Yes		1 hour	No	I don't have time		No	I don't have time		No	I don't have time		No	I don't have time		No			No
2013-11-13 13:19:59	1	180.34	94.328	40-49	During the day (between 7 am and 8 pm)	Before 7 am, At the beginning of the evening (6 pm - 8 pm)	6 to 9	9 to 12	3	2012 50 mile run, 14:09:25	> 3h	22:00:00	Yes	3	No	Yes	No			0	1	1	1	0	Between 6 and 7	Between 6 and 7	Between 7 and 8	No	I don't have the opportunity		No	I don't have the opportunity		No	I don't have the opportunity		No	I don't have the opportunity		No	I don't have the opportunity		No	I don't have the opportunity		No			No
2013-11-14 02:03:15	1	184	76	40-49	Shift work	It changes every day	9 to 12	More than 15	2	100 K 10h19'	Between 1 and 2	21:00:00	No	5	No	No	No			0	3	0	1	1	Between 6 and 7	Between 6 and 7	Between 7 and 8	No	I don't have time		No	I don't have time		No	I don't have time		No	I don't have time		No	I don't have time		No	I don't have time		Yes	No		No
2013-11-14 03:24:34	1	180.34	83.8975	40-49	During the day (between 7 am and 8 pm)	It changes every day	12 to 15	More than 15	4	Vermont 100, 2012 - 21:24:21 Vermont 100 2013 - 23:00:49	Between 1 and 2	21:00:00	No	3	No	No	No			0	0	1	0	0	Between 7 and 8	Between 7 and 8	Between 7 and 8	Yes		1 hour	Yes			Yes			Yes			Yes			Yes			Yes	No		No
2013-11-14 11:57:08	2	162	48	50- 59	At night	Before 7 am	6 to 9	9 to 12	0	2013= 108 km.	Between 2 and 3	22:00:00	No	5	Yes	Yes	Yes	valerian		0	4	0-1	0	0-1	Between 5 and 6	< 5	Between 6 and 7	No	can't nap		No			No			No			No			No			Yes	No		No
2013-11-14 15:46:33	1	170.18	72.56	> 60	During the day (between 7 am and 8 pm)	It changes every day	6 to 9	More than 15	1	1996 Western States Finish 2001 Knee Knacker 1990 to 2013 23 Knee Knacker Finishes	> 3h	22:00:00	Yes		No	Yes	No			0	3	0	0	3	Between 7 and 8	Between 7 and 8	Between 7 and 8	No	I don't need to		No	I don't need to		No	I don't need to		No	I don't need to		No	I don't need to		No	I don't need to		Yes	No		No
2013-11-15 07:15:51	2	170.18	64.8505	30-39	During the day (between 7 am and 8 pm)	Before 7 am, In the morning (7 am -12 pm)	6 to 9	9 to 12	3	2013 8 hours 14 minutes Youngstown Ultra Classic	> 3h	21:00:00	Yes	15	No	Yes	No			0	1	0	1	0	Between 8 and 9	Between 8 and 9	Between 8 and 9	No	I don't have time		No	I don't need to		No	I don't have time		No	I don't need to		No	I don't have time		No	I don't need to		No			No
2013-11-15 11:35:45	1	175.26	74.8275	18-29	During the day (between 7 am and 8 pm)	Before 7 am, In the morning (7 am -12 pm), In the afternoon (2 pm - 6 pm), At the beginning of the evening (6 pm - 8 pm)	More than 15	More than 15	5 and more	17:32 2010 Heartland 100mi (2nd) 4:49 2010 Flatrock 50k (1st) 8:17 2009 Heartland 50mi (3rd) Grand Slam of Ultrarunning 2011	Between 1 and 2	22:00:00	No	0.43	No	No	No			0	0	1	0	0	Between 7 and 8	Between 7 and 8	Between 8 and 9	No	I don't have time		No	I don't need to		No	I don't have time		No	I don't have time		No	I don't have time		No	I don't have time		Yes	No		No
2013-11-15 18:06:42	1	177.8	70.2925	30-39	Shift work	Before 7 am, In the morning (7 am -12 pm)	9 to 12	More than 15	3	All 2013 1st Trailmix 50k 1st Black Hills 50 mile 8th Tahoe Rim Trail 100 mile	Between 1 and 2	21:00:00	Yes	8	No	No	No			0	2017-08-05	0	2017-02-01	1	Between 6 and 7	Between 7 and 8	Between 7 and 8	No	I don't have the opportunity		No	I don't need to		No	I don't have time		No	I don't need to		No	I don't need to		No			Yes	No		No
2013-11-16 13:26:14	1	164	59	50- 59	During the day (between 7 am and 8 pm)	Before 7 am	3 to 6	less than 3	1	Top 1/4 OA after a good race Typically top 1/3 Once placed 1st in 50+ age group at 12 hour race	> 3h	Never after 8 pm	No	10	No	Yes	No			0	3-4 per week	1-2 per week	0	4-5 per week	Between 7 and 8	Between 8 and 9	Between 8 and 9	No	I don't have the opportunity	0	No	I don't have the opportunity	0	No	I don't have the opportunity	0	No	I don't have the opportunity	0	No	I don't have the opportunity	0	No	I don't have the opportunity	0	Yes	Yes	once 3 x 40 min naps Once crash at 3:30am in 24 hrs race then could run any more	No
2013-11-16 16:39:27	1	182.88	69.3855	40-49	During the day (between 7 am and 8 pm)	Before 7 am, At the beginning of the evening (6 pm - 8 pm)	9 to 12	12 to 15	2	2012 100k 11:48	Between 1 and 2	Later than midnight	No	17	No	No	No			0	17	0	0	0	Between 5 and 6	Between 8 and 9	Between 8 and 9	No	Not a successful napper		No	Not a successful napper		No	Not a successful napper		No	Not a successful napper		No	Not a successful napper		No	Not a successful napper		Yes	No		No
2013-11-18 09:52:35	1	160.02	58.955	18-29	During the day (between 7 am and 8 pm)	It changes every day	12 to 15	More than 15	2	2013 north fork 50M in 9:40	Between 2 and 3	Midnight	No	8	No	No	No			0	2	0	0	3	Between 6 and 7	Between 7 and 8	Between 7 and 8	No	I don't need to		No	I don't need to		No	I don't need to		No	I don't need to		No	I don't need to		No	I don't need to		No			No
2013-11-18 19:29:30	1	193.04	79.3625	40-49	During the day (between 7 am and 8 pm)	At the beginning of the evening (6 pm - 8 pm)	6 to 9	9 to 12	2	100 mile - 23:46 - 2007 50 mile - 9:18 - 2011	Between 2 and 3	Later than midnight	No	10	No	No	No			0	2	0	0	2	Between 6 and 7	Between 7 and 8	Between 7 and 8	No	I don't need to		No	I don't need to		No	I don't need to		No	I don't need to		No	I don't have time		No	I don't have time		Yes	No		No
2013-11-18 21:10:12	1	192	85	40-49	During the day (between 7 am and 8 pm)	At the beginning of the evening (6 pm - 8 pm)	3 to 6	6 to 9	0	n/a going to do my first ultra on 7th December 2013	Between 2 and 3	22:00:00	No	8	No	No	No			0	3	0	1	0	Between 6 and 7	Between 6 and 7	Between 6 and 7	No	I don't have the opportunity		Yes		60 minutes	No			Yes		45 minutes	No	I don't have the opportunity		Yes		90 minutes	No			No
2013-11-18 21:22:41	1	178	72	30-39	During the day (between 7 am and 8 pm)	It changes every day	6 to 9	9 to 12	0	2013	Between 1 and 2	21:00:00	Yes	20	No	Yes	No			0	4	4	0	0	Between 6 and 7	Between 6 and 7	Between 6 and 7	Yes		1	Yes		1	Yes		1	Yes		1	Yes		1	Yes		1	No	No		No
2013-11-18 21:58:16	1	172.72	68.025	> 60	During the day (between 7 am and 8 pm)	Before 7 am, At the beginning of the evening (6 pm - 8 pm), It changes every day	More than 15	More than 15	5 and more	Western States - 1999 German 100 - 2003 HURT 100 - 2001, 2004 Lean Horse 100 - 2006 Umstead 100 - 2005, 2007 Miwok 100k - 1998, 2001 Catalina 100K - 2000	> 3h	Never after 8 pm	Yes	8	No	No	No			none	2017-02-01	2017-02-01	1	0-2	Between 6 and 7	Between 6 and 7	Between 6 and 7	No	I don't have the opportunity		Yes		20 minutes	No	I don't need to		No	I don't need to		Yes		20 minutes	Yes		20 minutes	Yes	No		Yes
2013-11-19 08:06:50	2	147.32	48.978	40-49	During the day (between 7 am and 8 pm)	Before 7 am	12 to 15	More than 15	5 and more	223miles in 72:35 in 2010	> 3h	21:00:00	Yes	8	No	Yes	No			0	0	2	0	0	Between 7 and 8	Between 8 and 9	Between 6 and 7	Yes		20 min	Yes		20 min	Yes		20	Yes		20 min	Yes		30-45	Yes		1-2 hours	Yes	No		Yes
2013-11-19 09:36:28	1	180	68.025	40-49	During the day (between 7 am and 8 pm)	Before 7 am, In the morning (7 am -12 pm)	6 to 9	9 to 12	0	N/A	Between 1 and 2	21:00:00	No	12	No	Yes	No			0	0	1 (decaf)	0	0	Between 8 and 9	Between 8 and 9	Between 8 and 9	No	I don't have time		No	I don't need to		No	I don't have time		No	I don't need to		No	I don't have time		Yes		2 hours	No			No
2013-11-19 10:29:41	1	182.88	92.9675	30-39	During the day (between 7 am and 8 pm)	Before 7 am, Between 12 pm and 2 pm, It changes every day	6 to 9	9 to 12	2	Voyageur 50, in 2010: 11:29:03	Between 1 and 2	Midnight	Yes	10	No	No	No			0	0	0	0	1	Between 6 and 7	< 5	Between 7 and 8	No	I don't need to		No	I don't need to		No	I don't have the opportunity		No	I don't have the opportunity		No	I don't have the opportunity		No	I don't have the opportunity		Yes	No		No
2013-11-19 14:42:29	1	180	68.025	> 60	During the day (between 7 am and 8 pm)	Between 12 pm and 2 pm	6 to 9	9 to 12	3	1998 Bay Circuit Trail 50, 7:48 1998 Vermont 100, 19:43 2001 Hardrock 100, 41:14 2012 Collegiate Peaks 50 mile, 10:06, new over 60 CR	> 3h	21:00:00	No	3	No	No	No			0	1	0	0	1	Between 7 and 8	Between 7 and 8	Between 6 and 7	No	I don't need to		No	I don't need to		No	I don't have time		No	I don't have time		No	I don't have time		No	I don't have time		Yes	No		Yes
2013-11-19 15:35:53	1	165.1	69.3855	> 60	During the day (between 7 am and 8 pm)	Before 7 am	6 to 9	12 to 15	0	3:40 ish, 50K, 1982	< 1	Midnight	Yes	20	No	No	No		Count breaths, count heartbeats/minute	0	1	3	0	0	Between 6 and 7	Between 6 and 7	Between 6 and 7	No	I don't need to		No	I don't need to		No	I don't need to		Yes		1.0 hour	No	I don't need to		Yes		1.0 hour	No			No
2013-11-19 19:21:24	2	157.48	45.35	> 60	Unemployed	Before 7 am	9 to 12	9 to 12	4	100K 2005 50K 1997 100M 2004 6-day 2013 50M 2007	Between 2 and 3	Never after 8 pm	No	5	No	Yes	No			0	8	0	0	1	Between 7 and 8	Between 7 and 8	Between 7 and 8	No	I don't need to		No	I don't need to		No	I don't need to		No	I don't need to		No	I don't need to		No	I don't need to		Yes	No		No
2013-11-20 05:58:13	1	180	89.793	40-49	During the day (between 7 am and 8 pm)	In the morning (7 am -12 pm)	3 to 6	6 to 9	4	100-miles: 26:52 (2009 Pinhoti 100) 50-miles(52): 9:52 (2009 Delano 12-hour) 50K: 5:05 (2009 Landsford Canal 50K) Marathon: 3:13 (2011 Mercedes Marathon) Half-Marathon: 1:30 (2011 Silver Comet Half-Marathon) 10-miles: 1:12:11 (2011 ATC Singleton 10 Miler) 15K: 1:06:44 (2011 Iron Horse 15K) 10K: 00:39:50 (2011 Silver Comet 10K) 5K: 00:18:30 (2011 Blue Devils 5K)	> 3h	22:00:00	No	2	No	Yes	No			0	2	0	0	0	Between 8 and 9	Between 8 and 9	Between 9 and 10	No	I don't need to		No	I don't need to		No	I don't need to		No	I don't need to		No	I don't need to		No	I don't need to		Yes	No		Yes
2013-11-22 01:19:56	1	165.1	58.955	18-29	At night	In the morning (7 am -12 pm), In the afternoon (2 pm - 6 pm), It changes every day	9 to 12	More than 15	3	Hyner 50k 2013 8th place 5:39 Laurel Highlands 70.5 mile 16th place 15:49 Oil Creek 100 15th place 25:47:45	Between 1 and 2	22:00:00	Yes	1	No	No	No			0	1	0	0	1	Between 6 and 7	Between 6 and 7	Between 6 and 7	No	I don't need to		No	I don't need to		No	I don't need to		No	I don't need to		No	I don't need to		No	I don't need to		Yes	No		No
2013-11-25 05:07:54	1	180	75	30-39	During the day (between 7 am and 8 pm)	It changes every day	9 to 12	12 to 15	3	Winner Haliburton 50 miler x2 years in a row 2nd/3rd haliburton 100 miler 2nd Sulpher Springs 50 miler	> 3h	Midnight	No	4	No	No	No			0	4+	0	1	1	Between 6 and 7	Between 7 and 8	Between 7 and 8	Yes		45-60min	Yes		45-60 min	Yes		45-60 min	Yes		45-60 min	Yes		45-60 min	Yes		45-60 min	Yes	No		No
2013-11-26 20:10:09	1	182	81.63	> 60	During the day (between 7 am and 8 pm)	Before 7 am, In the morning (7 am -12 pm)	12 to 15	More than 15	0	NA I am a road runner. I run trail races sometimes because they are readily available, but rarely as a maximum effort.	> 3h	Later than midnight	No	5	No	No	No		i stop moving and close my eyes.	2017-12-10	0	2	2	0	Between 5 and 6	Between 5 and 6	Between 5 and 6	Yes		15 min	Yes		15 min	Yes		15 min	Yes		15 min	Yes		15 min	Yes		15 min	Yes	Yes	road or track races, not trails. usually i do not sleep. if i feel it necessary i will nap between 5 and 12 minutes.	Yes
2013-11-26 21:07:14	1	170.18	70.2925	50- 59	During the day (between 7 am and 8 pm)	In the morning (7 am -12 pm), At the beginning of the evening (6 pm - 8 pm)	12 to 15	More than 15	4	only the last 10 years.... 50K = 5:15 50 miles = 10:40 100K = 13:30 100 mile = 27:30	Between 1 and 2	21:00:00	Yes	7 yrs	No	Yes	No		reading using an IPAD	0	1	0	2	0	Between 7 and 8	Between 8 and 9	Between 7 and 8	No	I don't have the opportunity		No	I don't have the opportunity		No	I don't have the opportunity		No	I don't have the opportunity		No	I don't have the opportunity		No	I don't have the opportunity		Yes	No		Yes
2013-11-26 21:21:51	1	177.8	70.2925	> 60	Unemployed	In the morning (7 am -12 pm)	6 to 9	6 to 9	5 and more	2000 - 100M - 22:24:59	> 3h	21:00:00	No	7	No	Yes	No		no trouble falling asleep, but will wake up in middle of night and can't get back to sleep	0	1	0	1	1	Between 5 and 6	Between 5 and 6	Between 5 and 6	No	I don't need to		No	I don't need to		No	I don't need to		No	I don't need to		No	I don't need to		No	I don't need to		Yes	No		Yes
2013-11-26 21:25:18	1	173	77.095	40-49	During the day (between 7 am and 8 pm)	In the morning (7 am -12 pm), At the beginning of the evening (6 pm - 8 pm)	6 to 9	12 to 15	5 and more	Badwater 135 mile run 43:05 2005	> 3h	Never after 8 pm	No	2	No	Yes	No			0	6	0	0	1	Between 6 and 7	Between 6 and 7	Between 6 and 7	Yes		15 minutes	Yes		15 minutes	Yes		15 minutes	Yes		15 minutes	Yes		15 minutes	Yes		15 minutes	Yes	No		Yes
2013-11-26 22:00:30	1	182.88	79.816	18-29	During the day (between 7 am and 8 pm)	In the morning (7 am -12 pm)	9 to 12	9 to 12	3	4:39 50k	< 1	22:00:00	No	7	No	No	No			0	2	1	0	1	Between 7 and 8	Between 8 and 9	Between 7 and 8	No	I don't have the opportunity		No	I don't need to		No	I don't need to		No	I don't need to		No	I don't have time		Yes			No			No
2013-11-27 15:35:57	1	182.88	70.2925	40-49	During the day (between 7 am and 8 pm)	It changes every day	6 to 9	9 to 12	3	JFK 50 6:24 1994 Niagara 50 6:18	Between 1 and 2	21:00:00	No	3	No	Yes	No			0	3	0	0	2	Between 5 and 6	Between 8 and 9	Between 7 and 8	No	I don't have time	60 minutes	No	I don't need to	60	No	I don't have time		Yes			No	I don't have time		Yes		75 minutes	Yes	No		No
2013-11-30 19:33:43	1	175.26	58.5015	40-49	During the day (between 7 am and 8 pm)	Before 7 am	9 to 12	9 to 12	2	For a race over 50miles/80k, my best result was probably finishing 4th at the Vermont 100 in 2006.	Between 1 and 2	Midnight	No	7	No	No	No			0	0	3	0	0	Between 6 and 7	Between 7 and 8	> 10	No	I don't want to ruin my sleep schedule.		No	I don't want to ruin my sleep schedule.		No	I don't want to ruin my sleep schedule.		No	I don't want to ruin my sleep schedule.		No	I don't want to ruin my sleep schedule.		No	I don't want to ruin my sleep schedule.		Yes	No		No
2013-12-03 11:44:34	1	185.42	82.537	30-39	During the day (between 7 am and 8 pm)	Before 7 am, At the beginning of the evening (6 pm - 8 pm)	3 to 6	3 to 6	3	2012 - 100miler, 6thplace	< 1	22:00:00	No	4	No	No	No			0	4	0	0	<1	Between 7 and 8	Between 8 and 9	Between 8 and 9	No	I don't have the opportunity		No	I don't need to		No	I don't have the opportunity		No	I don't have the opportunity		No	I don't have the opportunity		Yes		20-30min	Yes	No		No
2013-12-03 14:14:40	2	160	50	50- 59	Shift work	Before 7 am, In the morning (7 am -12 pm), In the afternoon (2 pm - 6 pm), It changes every day	3 to 6	9 to 12	0	50k, 2000m altitude difference, 6h30 45k, 3200m altitude difference 6h54	Between 1 and 2	22:00:00	No	10	No	No	No		nothing	0	0	2	0	0	Between 6 and 7	Between 6 and 7	Between 6 and 7	No	I simply can't take naps, doesn't work for me		No	same reason as above		No	same reason as above		No	as above		No	as above		No	as above		No			No
2013-12-12 07:03:45	1	180	82	50- 59	During the day (between 7 am and 8 pm)	Before 7 am, In the morning (7 am -12 pm), At the beginning of the evening (6 pm - 8 pm)	9 to 12	9 to 12	3	2013 Glasshouse 100 miler, 27:35 2013 The north face 100km, 17:30	> 3h	21:00:00	No	1	No	No	No			0	3	0	3	0	Between 8 and 9	Between 8 and 9	Between 8 and 9	No	I don't need to		No	I don't need to		No	I don't have time		No	I don't need to	1 hour	No	I don't have time		Yes		1 hour	Yes	No		Yes
2013-12-20 02:32:01	1	182	70	40-49	During the day (between 7 am and 8 pm)	It changes every day	6 to 9	12 to 15	1	2012	Between 1 and 2	Midnight	No	10	No	No	No		meditation before sleeping. checking if I am breathing more through my left nostrill (then through the right nostrill)	0	0	2	0	0	Between 6 and 7	Between 7 and 8	Between 6 and 7	No	I don't need to		No	I don't need to		No	I don't have time		No	I don't need to		No	I don't have time		No	I don't need to		Yes	No		Yes
2014-03-29 13:32:50	2	160	55	18-29	During the day (between 7 am and 8 pm)	In the afternoon (2 pm - 6 pm), It changes every day	6 to 9	12 to 15	2	Hillary 80km 2014 12:48 Tarawera 69km 2014 9:54	Between 1 and 2	Midnight	No		No	Yes	No			0	0-1	0	0	0	Between 7 and 8	Between 7 and 8	Between 8 and 9	No	I don't have time		No	I don't have time		No	I don't have time		No	I don't have time		No	I don't have time		No	I don't have time		No			No
2014-04-15 06:10:19	1	179	85	40-49	During the day (between 7 am and 8 pm)	It changes every day	12 to 15	12 to 15	2	I don't usually run to compete but to complete the race.	Between 1 and 2	22:00:00	No	1 year ago	No	No	No	n/a		6	5	0	0	0	Between 5 and 6	Between 5 and 6	Between 5 and 6	No	I don't have the opportunity		No	I don't need to	5	No	I don't need to		No	I don't need to		No	I don't need to		No			Yes	Yes	Dosed off to sleep during he run.	Yes
2014-04-22 08:56:34	1	189	89	40-49	During the day (between 7 am and 8 pm)	In the morning (7 am -12 pm)	3 to 6	6 to 9	1	2012	Between 1 and 2	22:00:00	No	3	No	No	No			none	2	0	0	0	Between 6 and 7	Between 6 and 7	Between 6 and 7	No	I don't need to		No	I don't need to		No	I don't need to		No	I don't need to		No	I don't need to		No	I don't need to		No	No		No
[truncated: 18 more columns]

## Sheet: analysis
subject#	Gender	Height		Weight	Age	Age (Score)	When do you usually work?	When do you usually train?	During normal training, how many hours a week do you train?	During periods of intense training, how many hours a week do you train?	How many ultra-trail (> 80 km or 50 miles) races do you participate in every year?		How many hours a day are you in front of a device with a computer-type screen for NON-professional reasons?	Until what time do you usually use TV or a device with a computer-type screen for NON-professional reasons?	Do you have a TV in your bedroom?	Have you ever visited a physician for a sleep problem?	Do you have trouble falling asleep or do you wake during the night?	Do you usually take medicine to sleep?	If so, which drugs do you take?		subject#	Which methods do you use to fall asleep?	Which methods do you use to fall asleep? Code 1=reading; 2=listening to music; 3= relaxation methods/stretching; 4 = behavior strategy and or medicine; 5= NO strategy		How many cigarettes do you smoke per day?	How many cups of coffee do you drink per day?	How many cups of tea do you drink per day?	How many glasses of Coke (or Pepsi) do you drink per day?	How many glasses of alcohol do you drink per day?			subject#	How many hours do you sleep per night during the week when you work?	How many hours do you sleep per night during the week-end when you work during the week?	How many hours do you sleep per night when you are on vacation?	Do you take a nap when you do not train and you work during the day?	If not, why not?	If so, what is its average duration?	Do you take a nap when you do not train and you do not work?	If not, why not?	If so, what is its average duration?	Do you take a nap when you train normally and you work during the day?	If not, why not?	If so, what is its average duration?	Do you take a nap when you train normally and you don't twork?	If not, why not?	If so, what is its average duration?	Do you take a nap when you train a lot and you work during the day?	If not, why?
1	1	175		74	18- 29	1	1	3	2	3	1		3	22:00:00	No	No	No	No			1				0	0	0	0	0			1	Entre 6 et 7	>10	Entre 9 et 10	Oui		40	Non	1		Oui		40	Non	1		Oui
2	1	178		70	50- 59	4	1	6, 5, 2	2	3	0		2	22:00:00	No	No	No	No			2				0	4	0	0	1			2	Entre 8 et 9	Entre 8 et 9	Entre 8 et 9	Non	1		Oui		30	Non	1		Oui		30	Non	1
3	1	177		65	40-49	3	1	5, 2	2	3	1		1	22:00:00	No	No	No	No			3				0	1	0	0	0			3	Entre 6 et 7	Entre 7 et 8	Entre 7 et 8	Oui		20	Non	1		Oui		20	Non	1		Oui
4	1	161		60	50- 59	4	1	4, 3	2	4	3		1	22:00:00	No	No	yes	No			4	lire un livre	1		0	3	0	0	0			4	Entre 7 et 8	Entre 7 et 8	Entre 7 et 8	Oui		10	Oui			Oui			Oui			Oui
5	1	180		61	30-39	2	1	0	1	2	>5		1	na	No	No	No	No			5				0	0	0	0	0			5	Entre 5 et 6	Entre 8 et 9	Entre 8 et 9	Non	3		Non	3		Non	3		Non	3		Non	3
6	1	176		69	30-39	2	1	5, 2, 0	2	2	1		1	>00:00	No	No	No	No			6				0	1	0	0	0			6	Entre 6 et 7	Entre 6 et 7	Entre 6 et 7	Non	enfants		Non	1		Non	1		Non	1		Non	1
7	1	183		74	30-39	2	1	5, 4, 2	3	5	2		3	22:00:00	No	No	No	No			7				0	3	0	0	2			7	Entre 7 et 8	Entre 8 et 9	Entre 8 et 9	Non	2		Non	1		Non	1		Non	1		Non	1
8	1	181		72	50- 59	4	1	3, 2, 1	2	2	2		2	23:00:00	No	yes	yes	yes	Zolpidem		8	Somnifère ou relaxation	3.4		0	4	2	1	0			8	Entre 7 et 8	Entre 8 et 9	Entre 8 et 9	Non	3		Oui		60	Non			Oui		60	Non	3
9	1	171		67	50- 59	4	1	5, 2, 1	1	2	1		2	23:00:00	No	yes	yes	yes	Benzodiazepine		9				0	6	0	0	0			9	Entre 5 et 6	Entre 5 et 6	Entre 5 et 6	Non	2		Non	1		Non	1		Non	1		Non	1
10	2	172		63	40-49	3	1	3	4	6	2		2	21:00:00	yes	yes	yes	yes	Benzodiazepine, Zolpidem		10	tout preparer pour le lendemain se coucher tous les jours a la meme heure lire, écouter la radio ou regarder une série "calme" avant de chercher le sommeil	2.4		1	1	1	2	2			10	Entre 9 et 10	Entre 8 et 9	Entre 9 et 10	Non	1		Non	3		Non			Non	3		Non	1
11	1	175		70	50- 59	4	3	5	2	4	1		2	22:00:00	No	No	No	No			11	lecture	1		0	3	0	0	2			11	Entre 7 et 8	Entre 7 et 8	Entre 7 et 8	Oui		60	Non	1		Oui		60	Non	1		Oui
12	1	172		65	18- 29	1	1	0	2	4	3		2	00:00:00	No	No	No	No			12				0	0	1	0	0			12	Entre 7 et 8	Entre 8 et 9	Entre 8 et 9	Non	2		Non	1		Non	1		Non	1		Non	1
13	1	185		67	30-39	2	1	3, 1	3	5	1		2	22:00:00	No	No	No	No			13				0	3	0	0	0			13	Entre 6 et 7	Entre 8 et 9	Entre 9 et 10	Non	1		Oui		45	Non	1		Oui		60	Non	1
14	1	172		62	30-39	2	1	5, 2	2	3	1		2	22:00:00	No	No	No	No			14				0	3	2	0	0			14	Entre 7 et 8	Entre 8 et 9	Entre 8 et 9	Oui		20	Non	1		Oui		20	Non	1		Oui
15	1	178		65	30-39	2	1	5, 4, 2	4	6	4		3	22:00:00	yes	No	No	No			15				0	4	0	0	2			15	Entre 7 et 8	Entre 6 et 7	Entre 6 et 7	Non	2		Non	1		Non	3		Non	1		Non	3
16	1	173		67	30-39	2	1	4, 2	3	4	1		1	21:00:00	No	No	No	No			16				0	0	0	0	0			16	Entre 8 et 9	Entre 8 et 9	Entre 8 et 9	Non	3		Non	3		Non	3		Non	3		Non	3
17	1	179		78	30-39	2	1	4, 2	4	6	4		3	22:00:00	No	No	yes	No			17				0	3	0	0	0			17	Entre 8 et 9	Entre 9 et 10	Entre 8 et 9	Oui		40	Oui		40	Non	3		Oui		40	Oui
18	1	182		79	30-39	2	1	6, 4, 2	2	4	1		2	22:00:00	No	No	No	No			18				0	0	<1	<1	1			18	Entre 6 et 7	Entre 5 et 6	Entre 7 et 8	Non	3		Non	3		Non	3		Non	3		Non	3
19	1	166		55	50- 59	4	1	5	4	6	4		1	21:00:00	No	No	No	No			19				0	0	9	0	0			19	Entre 7 et 8	Entre 7 et 8	Entre 7 et 8	Oui		15	Oui		15	Oui		15	Oui		15	Oui
20	1	179		70	30-39	2	1	5, 4	3	5	4		1	23:00:00	No	No	yes	No			20				0	4	0	1	0			20	Entre 5 et 6	Entre 6 et 7	Entre 6 et 7	Non	3		Oui		120	Non	3		Oui		120	Non	3
21	1	179		80	30-39	2	3	5, 4	3	1	3		1	20:00:00	yes	No	yes	No			21				0	0	2	0	0			21	<5	Entre 7 et 8	Entre 8 et 9	Oui		20	Oui		60	Oui		90	Oui		60	Oui
22	1	182		81	50- 59	4	1	0	2	4	2		1	na	No	No	yes	No			22				0	1	0	0	0			22	Entre 6 et 7	Entre 6 et 7	Entre 6 et 7	Non	1		Oui		40	Non	1		Oui		40	Non	1
23	1	176		69	40-49	3	1	5, 1	2	5	4		3	00:00:00	No	No	yes	No			23	Assouplissements / Yoga Tisane / douche	3		0	0	2	0	0			23	Entre 6 et 7	Entre 6 et 7	Entre 7 et 8	Non	1		Non	1		Non	1		Non	Je ne m'en sens pas le droit		Non	1
24	2	157		53	40-49	3	1	0	2	3	2		1	20:00:00	No	No	No	No			24				0	3	0	0	0			24	Entre 7 et 8	Entre 7 et 8	Entre 7 et 8	Non	3		Oui		20	Non	3		Oui		20	Non	3
25	1	171		69	40-49	3	1	5, 2	3	6	3		3	22:00:00	yes	No	No	No			25				0	0	0	2	0			25	Entre 6 et 7	Entre 7 et 8	Entre 7 et 8	Non	2		Non	1		Non	1		Non	1		Non	1
26	1	174		62	40-49	3	1	4, 2	3	5	1		1	21:00:00	No	No	No	No			26				0	2	2	0	<1			26	Entre 7 et 8	Entre 7 et 8	Entre 7 et 8	Oui		20	Oui		40	Non	3		Oui		40	Non	3
27	1	191		75	30-39	2	1	6, 1	5	6	>5		3	22:00:00	No	No	No	No			27				0	2	1	0	0			27	Entre 6 et 7	Entre 7 et 8	Entre 7 et 8	Oui		10	Oui		30	Oui		10	Oui		30	Oui
28	1	182		72	30-39	2	1	6, 5, 4, 2	2	4	2		2	23:00:00	No	yes	No	No			28				0	2	1	2	0			28	Entre 7 et 8	Entre 7 et 8	Entre 7 et 8	Non	2		Non	1		Non	1		Non	1		Oui
29	1	192		80	30-39	2	1	0	2	3	2		1	23:00:00	yes	No	No	No			29				0	3	0	0	0			29	Entre 8 et 9	Entre 8 et 9	Entre 8 et 9	Non	1		Non	1		Non	1		Non	1		Non	1
30	1	166		64	50- 59	4	1	4	3	6	1		4	21:00:00	No	No	yes	No			30				0	5	5	0	0			30	Entre 5 et 6	Entre 5 et 6	Entre 5 et 6	Non	3		Non	3		Non	3		Oui		60	Oui
31	1	174		72	30-39	2	1	0	1	2	1		2	22:00:00	No	yes	No	No			31				0	3	0	0	0			31	Entre 6 et 7	Entre 7 et 8	Entre 7 et 8	Non	3		Oui		45	Non	3		Oui		45	Non	3
32	1	187		85	50- 59	4	1	4, 1	3	4	3		2	23:00:00	No	No	No	No			32				0	3	0	0	1			32	Entre 5 et 6	Entre 7 et 8	Entre 8 et 9	Oui		10	Non	1		Oui		10	Non	1		Oui
33	1	190		82	18- 29	1	1	3, 0	3	4	2		4	00:00:00	No	No	No	No			33				0	0	0	1	0			33	Entre 7 et 8	Entre 7 et 8	Entre 7 et 8	Non	2		Non	1		Non	1		Non	1		Non	1
34	2	161		55	30-39	2	1	5, 4, 0	3	6	>5		3	21:00:00	No	yes	yes	No			34	J essaie de me relaxer le plus possible pour dormir Il m'arrive de me réveiller en plein nuit en sueur - généralement entre 2 h et 4h du matin- si je me douche j'arrive a me rendormir sans problème	3		0	2	0	0	0			34	Entre 5 et 6	Entre 6 et 7	Entre 6 et 7	rarement		15	Oui		45	rarement		15	Oui		45	rarement
35	1	173		71	30-39	2	1	4, 1, 0	2	3	1		1	21:00:00	No	No	No	No			35				0	3	0	0	<1			35	Entre 8 et 9	Entre 8 et 9	Entre 8 et 9	Non	3		Oui		15	Non	3		Oui		15	Non	3
36	1	170		69	40-49	3	1	6, 4, 2	4	6	4		1	21:00:00	yes	No	No	No			36				0	5	0	0	0			36	Entre 7 et 8	Entre 7 et 8	Entre 7 et 8	Oui		20	Oui		20	Non	1		Oui		20	Non	1
37	1	180		81	18- 29	1	1	0	4	5	1		2	22:00:00	No	No	No	No			37				0	0	1	0	0			37	Entre 7 et 8	Entre 7 et 8	Entre 7 et 8	Oui		20	Oui		20	Oui		20	Oui		20	Oui
38	1	169		69	50- 59	4	1	5, 3, 0	3	4	1		1	00:00:00	No	No	No	No			38	Être dehors la journée me dépenser, faire du sport.	4		0	0	1	0	0			38	Entre 7 et 8	Entre 7 et 8	Entre 8 et 9	Non	3		Oui	1	60	Non	3		Oui		60	Non	3
39	2	162		52	30-39	2	1	4	4	5	4		1	21:00:00	No	No	No	No			39				0	6	1	0	0			39	Entre 7 et 8	Entre 8 et 9	Entre 8 et 9	Oui		10	Non	JE NE PRENDS PAS LE TEMPS		Oui		10	Non	1		Oui
40	1	172		64	30-39	2	1	0	3	4	1		3	22:00:00	No	No	No	No			40				0	1	1	0	0			40	Entre 7 et 8	Entre 8 et 9	Entre 8 et 9	Non	3		Non	1		Non	3		Non	1		Oui
41	1	173		71	30-39	2	1	5, 3, 2	3	5	1		3	23:00:00	No	No	No	No			41				0	4	0	0	0			41	Entre 7 et 8	Entre 9 et 10	Entre 9 et 10	Non	1		Oui		25	Non	3		Oui		25	Non	3
42	2	165		49	40-49	3	1	0	2	3	1		2	23:00:00	yes	No	No	No			42				0	2	1	0	0			42	Entre 6 et 7	Entre 8 et 9	Entre 9 et 10	Non	1		Oui		30	Non	1		Oui		30	Non	1
43	1	193		82	30-39	2	1	6, 5	2	3	1		3	21:00:00	No	No	No	No			43				0	0	2	0	1			43	Entre 7 et 8	Entre 7 et 8	Entre 8 et 9	Non	3		Non	Je n'y pense pas		Non	3		Non	Je n'y pense pas		Oui
44	1	180		71	50- 59	4	1	2	3	4	2		2	22:00:00	No	No	yes	No			44				0	1	1	<1	<1			44	Entre 6 et 7	Entre 8 et 9	Entre 8 et 9	Non	2		Non	1		Non	3		Oui		30	Non	3
45	1	180		78	30-39	2	1	4, 2	2	5	2		1	21:00:00	No	No	No	No			45				0	0	1	<1	<1			45	Entre 7 et 8	Entre 8 et 9	Entre 9 et 10	Non	1		Non	1		Non	3		Oui		30	Non	1
46	1	184		83	50- 59	4	1	3	2	4	1		2	>00:00	No	yes	yes	No			46				0	2	2	0	0			46	Entre 5 et 6	Entre 6 et 7	Entre 7 et 8	Oui		10	Oui		10	Oui		8	Oui		10	Oui
47	1	177		74	> 60	> 60	2	5, 4, 2	3	4	2		4	22:00:00	No	No	No	No			47				0	0	2	0	0			47	Entre 7 et 8	Entre 9 et 10	Entre 8 et 9	Non	3		Oui		60	Non	3		Oui		60	Non	3
48	1	179		73	50- 59	4	1	1	3	6	2		2	22:00:00	No	yes	yes	No			48				0	5	0	0	0			48	Entre 6 et 7	Entre 6 et 7	Entre 6 et 7	Non	1		Non	3		Non	1		Non	3		Non	1
49	1	174		71	40-49	3	1	0	2	4	1		3	23:00:00	No	No	yes	No			49				0	2	1	0	0			49	Entre 7 et 8	Entre 8 et 9	Entre 8 et 9	Non	3		Oui		30	Non	3		Oui		30	Non	3
50	1	172		62	40-49	3	1	0	3	5	2		2	22:00:00	No	No	No	No			50	Si grosse séance d'entraînement (VMA - escalade - travail de force - renforcement musculaire) étirements passifs. Relaxation, sophrologie au couché dans le lit.	3		0	2	0	0	0			50	Entre 7 et 8	Entre 8 et 9	Entre 8 et 9	Non	2		Non			Oui		15	Oui		15	Oui
51	1	172		68	18- 29	1	1	3, 2, 0	4	5	4		4	22:00:00	No	No	No	No			51				0	2	1	0	0			51	Entre 7 et 8	Entre 7 et 8	Entre 7 et 8	Oui		20	Oui		20	Oui		20	Oui		20	Oui
52	1	172		63	30-39	2	1	6, 5, 2	4	6	0		1	0.875	No	No	No	No			52				0	4	0	1	0			52	Entre 7 et 8	Entre 7 et 8	Entre 7 et 8	Non	3		Oui		60	Non	3		Oui		60	Non	3
53	1	174		72	18- 29	1	1	6, 2	2	3	1		4	23:00:00	No	No	No	No			53				0	1	1	0	1			53	Entre 6 et 7	Entre 7 et 8	Entre 7 et 8	Non	1		Oui		15	Non	1		Oui		15	Non	1
54	1	185		82	18- 29	1	1	2	3	4	1		3	22:00:00	No	No	No	No			54				0	1	0	0	1			54	Entre 7 et 8	Entre 8 et 9	>10	Oui		20	Non	1		Oui		20	Oui		20	Oui
55	1	168		57	40-49	3	1	5, 4, 1	2	3	1		2	23:00:00	No	No	No	No			55				0	3	1	0	0			55	Entre 7 et 8	Entre 8 et 9	Entre 8 et 9	Non	1		Non	1		Non	1		Non	1		Non	1
56	1	179		71	30-39	2	1	5	4	6	1		1	21:00:00	No	No	No	No			56				0	1	0	0	0			56	Entre 7 et 8	Entre 8 et 9	Entre 8 et 9	Non	3		Non	3		Non	3		Non	3		Non	3
57	1	183		85	30-39	2	1	2, 1	2	3	1		1	22:00:00	No	No	No	No			57				0	0	0	0	0			57	Entre 7 et 8	Entre 7 et 8	Entre 8 et 9	Non	3		Non	3		Non	1		Non	1		Non	3
58	2	159		45	40-49	3	1	0	4	5	2		1	22:00:00	No	No	No	No			58				0	3	0	0	0			58	Entre 7 et 8	Entre 7 et 8	Entre 7 et 8	Non	2		Non	1		Non	1		Non	1		Non	1
59	1	170		68	50- 59	4	1	6, 4	3	4	1		1	21:00:00	yes	No	No	No			59				0	2	0	0	1			59	Entre 7 et 8	Entre 8 et 9	Entre 9 et 10	Non	3		Oui		30	Non	3		Non	1		Non	3
60	1	180		80	40-49	3	1	6, 2	2	3	4		2	22:00:00	yes	No	yes	No			60	AUCUNE	5		0	3	0	0	0			60	Entre 7 et 8	Entre 7 et 8	Entre 7 et 8	Non	2		Non	1		Non	1		Non	1		Non	1
61	1	187		76	30-39	2	1	6, 5, 4	3	4	0		3	23:00:00	No	No	yes	No			61				0	5	2	0	0			61	Entre 5 et 6	Entre 7 et 8	Entre 7 et 8	Non	3		Non	3		Non	3		Non	3		Non	3
62	1	173		68	40-49	3	1	5, 2	2	4	2		2	23:00:00	No	No	No	No			62				0	7	1	0	1			62	Entre 7 et 8	Entre 8 et 9	Entre 8 et 9	Oui		15	Oui		15	Oui		15	Oui		15	Oui
63	1	189		69	30-39	2	1	5, 4	2	2	2		2	22:00:00	No	yes	yes	No			63	Lecture avant de dormir	1		0	1	1	0	0			63	Entre 7 et 8	Entre 8 et 9	Entre 8 et 9	Non	2		Non	1		Non	1		Non	1		Non	1
64	1	185		77	18- 29	1	1	2	2	3	1		2	21:00:00	No	No	No	No			64				0	1	1	0	0			64	Entre 8 et 9	Entre 8 et 9	Entre 8 et 9	Non	2		Non	1		Non	1		Non	1		Non	3
65	1	167		63	50- 59	4	1	4, 3, 2	4	6	4		3	23:00:00	yes	No	No	No			65	Rien de spécial !!	5		0	3	0	0	0			65	Entre 7 et 8	Entre 7 et 8	Entre 7 et 8	Non	2		Non	1		Non	1		Non	1		Non	1
66	1	178		70	40-49	3	1	5, 2	3	6	3		3	22:00:00	No	No	No	No			66				0	7	0	0	1			66	Entre 7 et 8	Entre 7 et 8	Entre 8 et 9	Non	1		Oui		60	Non	1		Oui		60	Non	1
67	1	185		71	40-49	3	1	4, 3	3	5	2		3	22:00:00	No	No	yes	No			67	je lis	1		0	0	2	0	0			67	Entre 7 et 8	Entre 7 et 8	Entre 7 et 8	Non	3		Non	je ne prends pas le temps		Non	3		rarement			Non	3
68	2	160		54	30-39	2	1	5, 4	2	4	1		2	21:00:00	yes	No	yes	No			68				0	4	1	0	0			68	Entre 7 et 8	Entre 7 et 8	Entre 8 et 9	Non	3		Oui		25	Non	3		Oui		25	Non	3
69	1	179		68	30-39	2	1	2, 1	2	3	0		1	00:00:00	No	No	No	No			69				0	4	0	0	0			69	Entre 7 et 8	Entre 8 et 9	>10	Non	3		Non			Non	3		Non	2		Non	1
70	1	168		62	50- 59	4	1	5, 4, 2	3	3	2		2	23:00:00	No	No	No	No			70				0	0	8	0	0			70	Entre 6 et 7	Entre 7 et 8	Entre 7 et 8	Non	2		Non	1		Non	1		Non	1		Non	1
71	1	183		78	40-49	3	1	6, 4, 1	3	5	2		2	22:00:00	No	No	No	No			71				0	0	1	0	1			71	Entre 7 et 8	Entre 8 et 9	Entre 7 et 8	Non	3		Oui		20	Non	3		Oui		20	Oui
72	1	172		64	40-49	3	1	5, 3	2	6	3		4	21:00:00	No	No	No	No			72				0	0	0	0	0			72	Entre 8 et 9	Entre 8 et 9	Entre 8 et 9	Non	2		Non	1		Non	1		Oui		15	Oui
73	1	187		81	30-39	2	1	6, 2, 1, 0	2	2	1		1	0.916667	yes	No	No	No			73				0	4	1	0	1			73	Entre 5 et 6	Entre 7 et 8	Entre 7 et 8	Non	3		Oui		20	Non	3		Oui		20	Non	3
74	1	165		58	40-49	3	1	6, 4	4	5	>5		1	na	No	No	No	No			74				0	0	0	0	0			74	Entre 6 et 7	Entre 7 et 8	Entre 9 et 10	Non	3		Non	1		Non	3		Oui		40	Non	3
75	1	170		65	30-39	2	1	5, 4, 2	3	5	3		2	22:00:00	No	No	No	No			75				0	2	1	0	1			75	Entre 7 et 8	Entre 7 et 8	Entre 7 et 8	Non	1		Non			Non	1		Oui		20	Non	1
76	1	186		83	18- 29	1	1	6, 4, 1	3	4	1		2	22:00:00	No	No	No	No			76				0	2	2	0	0			76	Entre 6 et 7	Entre 7 et 8	Entre 7 et 8	Non	2		Non	1		Non	1		Oui		15	Oui
77	1	171		62	40-49	3	1	6, 4, 3	3	4	>5		2	21:00:00	No	No	No	No			77				0	1	6	0	0			77	Entre 7 et 8	Entre 8 et 9	Entre 8 et 9	Non	je me reveille plus fatiquez		Non			Non			Non			Non
78	1	181		72	30-39	2	1	0	5	6	2		2	22:00:00	No	yes	yes	yes	Benzodiazepine		78	Maintenant, respiration, détente et vide intellectuel.	3		0	0	<1	<1	<1			78	Entre 7 et 8	Entre 8 et 9	Entre 8 et 9	Non	1		Oui		30 à 2h	Non	3		Oui		30' à 2	Non	3
79	2	166		59	30-39	2	1	6, 2, 0	5	6	3		4	23:00:00	No	yes	yes	No			79	regarder des films jusqu'à m'endormir devant	2		0	3	<1	0	0			79	Entre 7 et 8	Entre 8 et 9	Entre 8 et 9	Non	3		Non	1		Non	3		Non	1		Non	3
80	1	170		67	30-39	2	1	6, 4, 2	2	3	1		4	22:00:00	No	No	No	No			80				0	5	1	0	0			80	Entre 7 et 8	Entre 7 et 8	Entre 8 et 9	Non	1		Non	3		Non	3		Non	3		Non	3
81	1	182		88	40-49	3	4	6, 5, 3	3	4	1		1	20:00:00	yes	No	No	No			81				0	6	0	0	0			81	Entre 6 et 7	Entre 6 et 7	Entre 7 et 8	Oui		120	Non	1		Oui		120	Non	1		Oui
82	2	165		58	30-39	2	1	6, 4, 2	2	4	1		2	22:00:00	No	No	No	No			82				0	0	3	0	0			82	Entre 8 et 9	Entre 9 et 10	Entre 9 et 10	Non	3		Oui		20	Non	3		Oui		20	Non	3
83	1	183		72	40-49	3	1	5, 3, 2, 0	3	5	1		3	23:00:00	No	No	No	No			83	Je me couche...	5		0	2	0	0	0			83	Entre 7 et 8	Entre 9 et 10	Entre 9 et 10	Non	2		Non	1		Non	1		Non	1		Non	1
84	1	171		75	40-49	3	1	0	2	4	1		4	00:00:00	yes	No	No	No			84	je dors bcp mieux depuis que j'ai eliminé le gluten de mon alimentation	4		0	0	1	<1	0			84	Entre 6 et 7	Entre 6 et 7	Entre 6 et 7	Non	2		Oui		20	Non	1		Oui		20	Non	1
85	1	184		73	30-39	2	1	4, 2	2	3	1		1	21:00:00	No	No	yes	No			85				0	0	0	0	0			85	Entre 8 et 9	Entre 8 et 9	Entre 8 et 9	Non	2		Non	1		Non	1		Non	1		Non	3
86	1	170		68	40-49	3	1	4, 3, 2	2	3	3		2	22:00:00	No	No	No	No			86				2	5	0	0	1			86	Entre 6 et 7	Entre 6 et 7	Entre 6 et 7	Non	1		Oui		20	Non	1		Oui		20	Non	1
87	1	174		82	30-39	2	1	5, 2	3	4	3		3	00:00:00	No	No	yes	No			87				0	0	6	0	4			87	Entre 7 et 8	Entre 7 et 8	Entre 7 et 8	Non	3		Oui		60	Non	3		Oui		60	Non	3
88	1	186		71	40-49	3	1	5, 2	3	5	3		2	22:00:00	No	yes	yes	No			88				0	0	3	0	0			88	Entre 7 et 8	Entre 8 et 9	Entre 8 et 9	Non	3		Non	1		Non	3		Non	1		Non	3
89	1	179		76	30-39	2	1	5, 3, 1	2	3	3		2	>00:00	No	No	No	No			89				0	5	0	0	0			89	Entre 6 et 7	Entre 7 et 8	Entre 7 et 8	Non	2		Non	1		Non			Non	1		Non	1
90	1	173		75	40-49	3	1	0	1	2	3		1	20:00:00	yes	No	No	No			90				0	3	0	0	0			90	Entre 7 et 8	Entre 7 et 8	Entre 7 et 8	Non	2		Non	1		Non	1		Non	1		Non	1
91	1	169		57	30-39	2	1	6, 3, 1	3	4	3		2	00:00:00	No	No	No	No			91	Me blottir contre ma femme ...	4		0	4	1	<1	0			91	Entre 6 et 7	Entre 7 et 8	Entre 7 et 8	Non	3		Non	3		Non	3		Non	3		Non	3
92	1	178		71	18- 29	1	1	6, 2, 1	3	4	3		2	22:00:00	No	No	No	No			92	Tisanne de temps en temps	4		0	3	0	0	<1			92	Entre 7 et 8	Entre 8 et 9	Entre 8 et 9	Non	1		Oui		30	Non	1		Oui		30	Non	1
93	1	181		71	30-39	2	4	0	4	6	2		1	na	No	No	No	No			93				0	2	1	0	0			93	Entre 6 et 7	Entre 7 et 8	Entre 7 et 8	Oui		120	Non	1		Oui		120	Non			Non	1
94	2	161		53	50- 59	4	1	4, 2	3	3	>5		1	23:00:00	No	No	No	No			94				0	3	1	0	0			94	Entre 8 et 9	Entre 8 et 9	Entre 8 et 9	Non	2		Non	1		Non	1		Non	1		Non	1
95	1	175		80	30-39	2	1	6, 2	2	5	3		2	21:00:00	No	No	yes	No			95				0	0	4	0	1			95	Entre 8 et 9	Entre 9 et 10	Entre 8 et 9	Non	3		Oui		60	Non	3		Oui		60	Non	3
96	1	183		102	40-49	3	1	5, 4, 2	2	5	2		3	22:00:00	No	No	yes	No			96				0	1	2	0	2			96	Entre 6 et 7	Entre 7 et 8	Entre 8 et 9	Oui		30	Non	1		Non	3		Oui		30	Non	3
97	1	184		70	40-49	3	1	4, 1	2	3	2		3	23:00:00	No	yes	No	No			97				0	2	0	0	0			97	Entre 6 et 7	Entre 7 et 8	Entre 7 et 8	Non	1		Non	j'essaie souvent sans parvenir à m'endormir		Non	1		Non	j'essaie souvent sans parvenir à m'endormir		Non	1
98	1	168		69	50- 59	4	1	0	2	2	2		4	23:00:00	No	No	No	No			98				0	2	0	0	1			98	Entre 7 et 8	Entre 7 et 8	Entre 7 et 8	Non	2		Non	1		Non	1		Non	1		Non	1
99	1	181		80	50- 59	4	1	6, 5, 2	2	3	1		2	21:00:00	No	No	No	No			99	Je ferme les yeux (lol)	5		0	0	1	0	<1			99	Entre 7 et 8	Entre 7 et 8	Entre 8 et 9	Non	2		Oui		30	Non	1		Oui			Non	1
100	1	175		64	40-49	3	3	5, 3	3	4	1		2	22:00:00	No	No	No	No			100				0	3	1	0	<1			100	Entre 6 et 7	Entre 7 et 8	Entre 7 et 8	Oui		20	Oui		20	Oui		20	Oui		20	Oui
101	1	169		69	40-49	3	1	2	4	5	3		3	22:00:00	No	No	No	No			101				0	4	0	0	0			101	Entre 7 et 8	Entre 8 et 9	Entre 8 et 9	Non	1		Non	1		Non	1		Non			Oui
102	1	184		76	50- 59	4	1	6, 4, 1	3	4	4		2	23:00:00	No	No	No	No			102	détente musculaire	3		0	4	0	0	0			102	Entre 6 et 7	Entre 7 et 8	Entre 7 et 8	Non	2		Non	1		Non	3		Oui		45	Non	3
103	1	165		60	40-49	3	1	5, 2	2	4	4		2	21:00:00	No	No	No	No			103				0	1	0	0	1			103	Entre 7 et 8	Entre 7 et 8	Entre 7 et 8	Non	1		Oui		15	Non	1		Oui		15	Non	1
104	1	165		59	50- 59	4	1	5, 4, 3	2	2	4		2	23:00:00	No	No	No	No			104				0	0	0	0	0			104	Entre 7 et 8	Entre 8 et 9	Entre 9 et 10	Non	1		Oui		30	Non	1		Oui		90	Non	1
105	2	165		54	40-49	3	1	0	4	5	2		2	23:00:00	No	No	No	No			105				0	3	1	0	0			105	Entre 6 et 7	Entre 7 et 8	Entre 7 et 8	Non	3		Non	1		Non	3		Oui		30	Non	3
106	1	187		78	40-49	3	1	4, 2	3	4	2		4	22:00:00	yes	No	No	No			106				0	3	0	0	1			106	<5	<5	<5	Oui		15	Oui		15	Oui		15	Oui		15	Oui
107	1	172		65	40-49	3	1	6, 5, 4, 2	2	3	2		3	23:00:00	No	No	No	No			107				0	0	0	0	0			107	Entre 7 et 8	Entre 8 et 9	Entre 8 et 9	Non	1		Oui		20	Non	1		Oui		30	Non	1
108	1	171		66	40-49	3	1	5, 4, 1	2	3	2		1	23:00:00	No	No	No	No			108				0	0	0	0	0			108	Entre 6 et 7	Entre 6 et 7	Entre 6 et 7	oui		30	Non			Oui			Oui		30	Oui
109	1	175		63	40-49	3	1	3, 2, 1	4	6	1		3	23:00:00	No	No	No	No			109				0	1	1	0	<1			109	Entre 7 et 8	Entre 8 et 9	Entre 8 et 9	Non	3		Non	1		Non	3		Non	3		Non	3
110	1	174		78	40-49	3	1	5, 4	3	4	3		2	00:00:00	yes	yes	No	No			110	Rien de spécial	5		0	4	1	0	0			110	Entre 6 et 7	Entre 6 et 7	Entre 7 et 8	Non	3		Oui		45	Non	3		Oui		45	Non	3
111	2	167		67.5	40-49	3	1	6, 5, 3	3	4	1		2	21:00:00	No	No	No	No			111				0	0	0	0	0			111	Entre 7 et 8	Entre 8 et 9	Entre 8 et 9	Non	3		Oui		60	Non	3		Non	1		Non	3
112	1	175		67	40-49	3	1	0	6	6	3		2	21:00:00	No	yes	yes	No			112	je ferme les yeux!	5		0	5	0	2	1			112	Entre 7 et 8	Entre 7 et 8	Entre 8 et 9	Non	2		Non	1		Non	1		Non	1		Non	1
113	1	188		88	30-39	2	1	2	2	4	0		3	>00:00	No	yes	yes	yes	phytotherapy, homeopathy		113				0	4	0	0	2			113	Entre 5 et 6	Entre 5 et 6	Entre 9 et 10	Non	1		Oui		20	Non	3		Oui		30	Non	3
114	1	192		76	18- 29	1	1	5, 2	2	4	2		4	22:00:00	No	No	No	No			114	Je m'allonge sur le dos puis environs 5min plus tard je me mets sur le ventre et m'endors en 2min	5		0	0	1	2	0			114	Entre 6 et 7	Entre 8 et 9	Entre 8 et 9	Non	3		Non	1		Non	3		Non			Non	3
115	1	175		68	30-39	2	1	6, 4, 3	2	2	1		2	22:00:00	No	No	yes	No			115				0	0	0	1	1			115	Entre 7 et 8	Entre 7 et 8	Entre 7 et 8	Non	1		Oui		30	Non	1		Oui		30	Non	1
116	1	179		80	50- 59	4	1	5, 3, 1	2	5	1		2	21:00:00	No	No	No	No			116				0	4	0	0	0			116	Entre 7 et 8	Entre 7 et 8	Entre 7 et 8	Non	3		Oui		60	Non	3		Oui		60	Non	3
117	1	192		82.8	30-39	2	1	4, 2	4	5	1		1	22:00:00	No	No	No	No			117				0	0	0	0	0			117	Entre 9 et 10	Entre 9 et 10	Entre 9 et 10	Non	3		Non	1		Non	1		Non	1		Non	1
118	1	178		82	50- 59	4	1	2	3	4	2		2	22:00:00	No	No	No	No			118				0	3	1	<1	<1			118	Entre 6 et 7	Entre 7 et 8	Entre 7 et 8	Non	2		Non			Non	1		Oui		30	Non	1
119	1	180		78	30-39	2	1	5, 2, 1	2	5	1		2	00:00:00	No	No	No	No			119				0	0	0	0	0			119	Entre 6 et 7	Entre 6 et 7	Entre 7 et 8	Oui		40	Oui		40	Oui		40	Oui		40	Oui
120	1	176		68	30-39	2	1	4, 2	4	5	1		2	22:00:00	No	No	No	No			120				0	2	0	0	0			120	Entre 7 et 8	Entre 7 et 8	Entre 8 et 9	Non	2		Non	1		Oui		15	Oui		15	Oui
121	2	165		56	40-49	3	3	5, 3	2	3	1		2	22:00:00	yes	No	yes	No			121				0	3	0	0	0			121	Entre 5 et 6	Entre 5 et 6	Entre 6 et 7	Non	2		Non	1		Non	1		Non	1		Non	1
122	1	179		71	18- 29	1	1	5, 3, 2	4	5	1		2	22:00:00	No	No	No	No			122				0	1	3	0	1			122	Entre 7 et 8	Entre 8 et 9	Entre 8 et 9	Non	1		Oui		30	Non	1		Oui		45	Oui
123	1	181		73	30-39	2	1	4, 1	3	2	3		1	21:00:00	No	No	No	No			123				0	0	0	0	0			123	Entre 8 et 9	Entre 8 et 9	Entre 8 et 9	Non	1		Non	3		Non	3		Non	3		Non	3
124	1	184		69	30-39	2	1	5, 2	2	3	1		4	23:00:00	No	No	No	No			124				0	0	0	0	1			124	Entre 6 et 7	Entre 8 et 9	Entre 8 et 9	Non	2		Non	1		Non	1		Non	1		Non	1
125	1	190		80	30-39	2	1	5	2	2	1		3	22:00:00	No	No	No	No			125	lire pour s'endormir	1		0	0	2	0	1			125	Entre 7 et 8	Entre 7 et 8	Entre 8 et 9	Non	3		Non			Non	3		Oui		60	Non	3
126	1	183		78	40-49	3	1	4, 2	2	3	1		2	22:00:00	No	No	No	No			126				0	5	1	0	0			126	Entre 7 et 8	Entre 7 et 8	Entre 8 et 9	Non	2		Non	1		Non			Non			Non
127	1	181		72	50- 59	4	1	5, 3, 2	3	5	1		4	23:00:00	No	No	yes	No			127				0	0	0	0	0			127	Entre 6 et 7	Entre 7 et 8	Entre 8 et 9	Oui		40	Oui		60	Oui		40	Oui		60	Oui
128	1	176		68	> 60	> 60	1	5, 2	2	3	3		1	23:00:00	yes	No	No	No			128				0	2	1	0	<1			128	Entre 7 et 8	Entre 7 et 8	Entre 8 et 9	Non	2		Oui		20	Non	3		Oui		20	Oui
129	1	173		66	30-39	2	1	4, 2	3	4	3		2	21:00:00	No	No	No	No			129				0	3	1	2	0			129	Entre 6 et 7	Entre 7 et 8	Entre 7 et 8	Non	3		Non	je ne prend pas le temps		Non	3		Non	3		Non	3
130	1	180		75	50- 59	4	1	0	2	4	2		2	22:00:00	yes	No	yes	yes	Doxilamine		130				0	6	0	0	0			130	Entre 6 et 7	Entre 7 et 8	Entre 7 et 8	Oui		10	Non	3		Oui		10	Non	3		Oui
131	1	170		62	40-49	3	1	4	2	4	1		2	22:00:00	No	No	No	No			131				0	5	0	0	1			131	Entre 7 et 8	Entre 8 et 9	Entre 8 et 9	Non	1		Oui		30	Non	1		Oui		30	Non	1
132	1	184		70	30-39	2	1	5, 2, 0	1	2	1		2	>00:00	No	No	No	No			132	je me couche quand je suis épuisé et que je pique du nez	5		0	<1	1	0	<1			132	Entre 6 et 7	Entre 7 et 8	Entre 7 et 8	Non	2		Non	1		Non			Oui		20	Oui
133	1	181		66	30-39	2	1	2	4	6	4		2	00:00:00	yes	No	yes	No			133				4	0	0	0	2			133	Entre 6 et 7	Entre 7 et 8	Entre 6 et 7	Non	1		Non	3		Non	3		Non	3		Non	3
134	1	175		70	40-49	3	1	6, 5, 2, 1, 0	4	4	0		3	23:00:00	No	yes	yes	yes	Zopiclone		134				0	0	0	0	0			134	Entre 6 et 7	Entre 7 et 8	Entre 7 et 8	Non	3		Oui		60	Non	3		Oui		60	Non	3
135	1	180		77	30-39	2	1	6, 5, 4	2	4	3		3	23:00:00	yes	No	No	No			135				0	2	4	0	0			135	Entre 6 et 7	Entre 7 et 8	Entre 7 et 8	Non	2		Non	1		Non	3		Non	1		Non	3
136	2	154		45	40-49	3	1	4, 2, 0	3	5	0		1	na	No	No	yes	No			136				0	2	1	0	0			136	<5	<5	<5	Non	3		Non	1		Non	3		Non			Non	3
137	1	177		70	40-49	3	3	5	4	6	3		3	22:00:00	No	No	No	No			137				0	2	0	1	0			137	Entre 5 et 6	Entre 7 et 8	Entre 8 et 9	Non	1		Oui		25	Non			Oui			Non	1
138	1	183		74.5	30-39	2	1	3, 2	1	2	>5		2	23:00:00	yes	No	No	No			138				0	3	1	0	0			138	Entre 6 et 7	Entre 7 et 8	Entre 7 et 8	Non	2		Non	1		Non	1		Non	1		Non	1
139	1	176		67	30-39	2	1	5, 3, 2	3	4	0		3	21:00:00	yes	No	yes	No			139				0	2	1	0	0			139	Entre 6 et 7	Entre 8 et 9	Entre 8 et 9	Non	1		Non	1		Non	1		Oui		45	Non	1
140	1	181		68	40-49	3	1	4, 1, 0	2	3	0		2	23:00:00	No	No	No	No			140				0	3	1	0	<1			140	Entre 7 et 8	Entre 7 et 8	Entre 8 et 9	Non	1		Oui		15	Non	1		Oui		15	Non	1
141	1	179		80	40-49	3	1	6, 4	3	4	2		2	21:00:00	yes	No	No	No			141				0	1	2	0	0			141	Entre 7 et 8	Entre 7 et 8	Entre 7 et 8	Non	3		Non	3		Non	3		Non	3		Non	3
142	1	187		86	30-39	2	1	4, 2	3	4	3		3	00:00:00	No	No	yes	No			142				0	0	3	0	2			142	Entre 6 et 7	Entre 7 et 8	Entre 7 et 8	Non	3		Non	1		Non	3		Non	1		Non	3
143	2	166		58	30-39	2	1	6, 5, 4, 3, 1, 0	3	4	1		2	23:00:00	No	No	yes	yes	Muscle relaxant, phytotherapy		143	ecouter de la musqiue	2		0	0	4	0	0			143	<5	Entre 6 et 7	Entre 7 et 8	Non	3		Non	je profite du tempslibre pour faire autre chose		Non	3		Non	1		Non	3
144	1	173		65	18- 29	1	1	6, 1, 0	3	4	2		2	23:00:00	No	No	No	No			144				0	1	0	2	1			144	Entre 6 et 7	Entre 7 et 8	Entre 7 et 8	Non	1		Non	1		Non	3		Non	1		Non	3
145	1	176		76	18- 29	1	1	5, 2, 0	3	4	0		2	22:00:00	yes	No	No	No			145				0	1	2	1	0			145	Entre 7 et 8	Entre 7 et 8	Entre 7 et 8	Non	2		Non	1		Non	1		Non	1		Non	1
146	1	180		69	30-39	2	1	6, 1, 0	4	5	1		1	21:00:00	yes	No	No	No			146	M'etendre!	5		0	2	1	0	1			146	Entre 6 et 7	Entre 8 et 9	Entre 8 et 9	Non	Je ne l'aime pas		Non	Je ne l'aime pas		Non	Je ne l'aime pas		Non	Je ne l'aime pas		Non	Je ne l'aime pas
147	1	173		70	40-49	3	1	4, 2	2	3	3		2	22:00:00	No	No	No	No			147				0	3	1	0	0			147	Entre 7 et 8	Entre 8 et 9	Entre 7 et 8	Non	2		Oui		30	Oui		30	Oui		30	Oui
148	1	172		66	40-49	3	1	5, 2	2	5	0		3	00:00:00	No	No	No	No			148				0	0	0	0	1			148	Entre 6 et 7	Entre 7 et 8	Entre 7 et 8	Non	2		Oui		30	Non			Oui		30	Non
149	1	183		74	18- 29	1	1	4, 3, 2	3	4	2		4	00:00:00	No	No	No	No			149				0	3	0	0	0			149	Entre 7 et 8	Entre 9 et 10	>10	Non	2		Non	1		Non	1		Non	1		Oui
150	1	178		65	30-39	2	1	3, 2	2	4	0		1	20:00:00	No	No	No	No			150				0	2	1	0	1			150	Entre 7 et 8	Entre 8 et 9	Entre 8 et 9	Non	1		Oui		20	Non	1		Oui		45	Non	1
151	2	165		58	18- 29	1	1	0	3	5	2		1	22:00:00	No	No	No	No			151				0	1	0	0	0			151	Entre 7 et 8	Entre 8 et 9	Entre 8 et 9	Non	2		Non	1		Non	3		Non	1		Non	3
152	1	169		64	40-49	3	4	0	4	6	1		3	23:00:00	No	No	No	No			152				0	3	0	0	0			152	Entre 6 et 7	Entre 7 et 8	Entre 7 et 8	Non	2		Non			Non	1		Non	1		Non	1
153	1	182		69	40-49	3	1	5, 1	3	4	1		3	23:00:00	No	No	No	No			153				0	1	0	0	0			153	Entre 6 et 7	Entre 8 et 9	Entre 8 et 9	Non	1		Non	3		Non	1		Non	3		Non	1
154	1	178		64	30-39	2	1	5, 2	1	2	3		2	00:00:00	No	No	No	No			154				0	2	0	0	0			154	Entre 7 et 8	Entre 8 et 9	Entre 8 et 9	Non	3		Non	1		Non	3		Non	1		Non	3
155	1	180		70	40-49	3	1	5, 2	4	6	2		3	00:00:00	yes	No	No	No			155				0	42828	1	0	1			155	Entre 6 et 7	Entre 6 et 7	Entre 7 et 8	Non			Oui		90	Oui		20	Oui		60	Oui
156	1	184		79	18- 29	1	1	0	2	4	3		1	21:00:00	No	No	No	No			156				1	2	1	0	1			156	Entre 7 et 8	Entre 7 et 8	Entre 7 et 8	Oui		20	Oui		20	Oui		20	Non			Oui
157	1	174		69	40-49	3	1	5, 4, 1	2	3	1		2	22:00:00	No	yes	yes	No			157	Homéopathy	4		0	3	1	0	0			157	Entre 6 et 7	Entre 7 et 8	Entre 7 et 8	Non	3		Oui		15	Non	3		Oui		15	Non	3
158	2	165		60	18- 29	1	1	2	3	5	1		1	22:00:00	No	No	No	No			158				0	0	0	2	0			158	Entre 6 et 7	Entre 7 et 8	Entre 8 et 9	Oui		10	Non	1		Non	3		Non	1		Non	3
159	1	175		63	40-49	3	1	6, 5	2	4	2		3	22:00:00	No	No	No	No			159				0	2	0	0	0			159	Entre 7 et 8	Entre 7 et 8	Entre 7 et 8	Non	2		Non	3		Non	3		Non	3		Non	3
160	1	175		67	30-39	2	1	6, 4, 3	2	3	1		2	23:00:00	yes	No	No	No			160	Rien	5		0	0	1	0	0			160	Entre 7 et 8	Entre 8 et 9	Entre 8 et 9	Non	2		Non	1		Non	1		Non	1		Non	1
161	1	172		72	30-39	2	1	6, 1	2	3	2		1	22:00:00	No	No	No	No			161				0	0	3	1	0			161	Entre 7 et 8	Entre 7 et 8	Entre 7 et 8	Non	1		Oui		120	Non	1		Oui		120	Non	1
162	1	179		82	40-49	3	1	4, 3, 2	2	3	1		2	22:00:00	No	No	No	No			162				0	5	2	0	0			162	Entre 7 et 8	Entre 6 et 7	Entre 7 et 8	Oui		60	Non	1		Non	3		Oui		120	Non	3
163	1	181		72.5	30-39	2	1	4, 2	2	5	0		1	20:00:00	No	No	No	No			163				0	1	1	0	0			163	Entre 7 et 8	Entre 8 et 9	Entre 8 et 9	Non	1		Oui		15	Non	1		Oui		15	Non	1
164	1	175		75	30-39	2	1	4, 1, 0	2	3	1		2	>00:00	No	No	yes	No			164				0	0	1	0	0			164	Entre 5 et 6	Entre 5 et 6	Entre 6 et 7	Non	3		Oui		60	Non	3		Oui		60	Non	3
165	1	175		70	40-49	3	1	5, 2, 0	3	5	0		2	22:00:00	No	No	No	No			165				0	0	1	0	1			165	Entre 7 et 8	Entre 7 et 8	Entre 7 et 8	Non	2		Non	1		Non	1		Non	1		Non	1
166	1	170		60	30-39	2	3	0	4	6	0		2	21:00:00	No	No	No	No			166				0	4	1	0	1			166	Entre 6 et 7	Entre 6 et 7	Entre 7 et 8	Non	3		Oui		30	Non	3		Oui		30	Non	3
167	2	166		51	40-49	3	1	6, 4, 0	3	4	4		3	21:00:00	No	yes	yes	No			167				0	2	0	0	0			167	Entre 7 et 8	Entre 8 et 9	Entre 7 et 8	Non	1		Non	1		Non	1		Non	1		Non	1
168	1	178		70.5	18- 29	1	3	0	3	4	0		2	22:00:00	No	No	yes	No			168				0	0	0	5	0			168	Entre 7 et 8	Entre 8 et 9	Entre 8 et 9	Non	2		Non	1		Non	1		Non	1		Non	1
169	1	190		86	40-49	3	1	0	3	5	2		2	23:00:00	No	No	No	No			169				0	4	2	0	0			169	Entre 5 et 6	Entre 6 et 7	Entre 7 et 8	Oui		15	Oui		15	Oui		15	Oui		15	Oui
170	1	192		89	40-49	3	1	6	3	4	4		4	21:00:00	yes	No	No	No			170				0	0	1	0	0			170	Entre 7 et 8	Entre 7 et 8	Entre 7 et 8	Non	1		Non			Non	1		Oui		30	Non	1
171	1	185		85	18- 29	1	1	5, 2	2	4	1		2	21:00:00	No	No	No	No			171				0	0	1	0	0			171	Entre 7 et 8	Entre 7 et 8	Entre 8 et 9	Non	2		Non	1		Non	1		Non	1		Oui
172	1	171		66	40-49	3	1	2	3	5	0		2	23:00:00	No	No	No	No			172				0	0	2	0	0			172	Entre 7 et 8	Entre 8 et 9	Entre 8 et 9	Non	3		Oui		60	Non	3		Oui		60	Non	3
173	2	162		53	40-49	3	1	5, 4, 2	3	4	2		1	22:00:00	No	No	No	No			173				0	2	0	0	0			173	Entre 5 et 6	Entre 7 et 8	Entre 8 et 9	Non	2		Non	1		Non	1		Non	1		Non	1
174	1	177		68	40-49	3	1	6, 3	4	6	2		2	21:00:00	No	yes	No	No			174				0	3	0	0	1			174	Entre 6 et 7	Entre 7 et 8	Entre 6 et 7	Oui		15	Oui			Oui			Oui			Non	3
175	1	173		60	18- 29	1	1	6, 4, 2	3	4	3		2	00:00:00	No	No	No	No			175				0	2	0	0	<1			175	Entre 6 et 7	Entre 7 et 8	Entre 7 et 8	Non	2		Non	1		Non	1		Non	1		Non	1
176	1	167		63	50- 59	4	1	5, 2	3	4	2		2	23:00:00	No	No	No	No			176	Lecture	1		0	4	0	0	1			176	Entre 6 et 7	Entre 7 et 8	Entre 7 et 8	Non	3		Oui		60	Non	3		Oui		60	Non	3
177	1	172		72	40-49	3	1	5, 4, 2	3	5	3		2	>00:00	No	No	No	No			177				0	2	0	0	0			177	Entre 6 et 7	Entre 7 et 8	Entre 7 et 8	Non	2		Non	1		Non	1		Non	1		Non	1
178	1	170		70	40-49	3	1	2	2	4	2		2	20:00:00	yes	No	No	No			178				0	4	0	0	0			178	Entre 6 et 7	Entre 6 et 7	Entre 7 et 8	Non	2		Non	1		Non	1		Non	1		Oui
179	2	168		50	30-39	2	1	5	3	4	2		2	21:00:00	No	No	No	No			179				0	0	1	2	0			179	Entre 8 et 9	Entre 8 et 9	Entre 8 et 9	Non	3		Non	1		Non	3		Oui		60	Non	3
180	1	185		78	40-49	3	1	0	3	5	2		2	23:00:00	No	No	No	No			180	Je regarde Derrick ! (je plaisante)	5		0	3	0	0	0			180	Entre 7 et 8	Entre 8 et 9	Entre 8 et 9	rarement		20	Oui		20	rarement		20	Oui		20	Oui
181	2	169		52	40-49	3	1	6, 5	2	3	3		2	22:00:00	yes	No	yes	yes	Zolpidem, benzodianepine		181				0	2	0	1	0			181	Entre 6 et 7	Entre 7 et 8	Entre 7 et 8	Non	1		Non			Non	1		Oui		60	Non	1
182	1	174		75	30-39	2	1	5, 1	2	4	3		2	22:00:00	No	No	No	No			182				0	2	0	0	0			182	Entre 7 et 8	Entre 8 et 9	Entre 8 et 9	Non	3		Oui		20	Non	3		Non	1		Non	3
183	1	167		63	18- 29	1	1	5, 3	3	3	1		2	22:00:00	No	No	No	No			183	Me mettre à plat ventre	5		0	0	2	0	2			183	Entre 7 et 8	Entre 8 et 9	Entre 8 et 9	Non	3		Non	1		Non	3		Non	1		Non	3
184	2	155		50	40-49	3	1	5, 3, 2, 0	2	4	0		2	22:00:00	yes	No	No	No			184				0	4	0	0	0			184	Entre 6 et 7	Entre 7 et 8	Entre 7 et 8	Oui		30	Non	1		Oui		30	Non	1		Oui
185	1	186		76	30-39	2	3	5, 3, 2	2	3	2		2	22:00:00	yes	No	No	No			185				0	3	0	0	0			185	Entre 6 et 7	Entre 7 et 8	Entre 7 et 8	Oui		30	Non	1		Oui		30	Non	1		Oui
186	1	185		78	40-49	3	1	5, 2, 0	3	4	2		2	22:00:00	yes	No	No	No			186				0	2	0	0	1			186	Entre 7 et 8	Entre 7 et 8	Entre 7 et 8	Non	3		Non	1		Oui		20	Non	1		Oui
187	2	168		50	30-39	2	1	5	3	4	2		2	21:00:00	No	No	No	No			187				0	0	1	2	0			187	Entre 8 et 9	Entre 8 et 9	Entre 8 et 9	Non	3		Non	1		Non	3		Oui		60	Non	3
188	1	182		69	40-49	3	1	5, 2, 1	3	4	2		3	00:00:00	No	No	No	No			188				0	6	0	0	2			188	Entre 7 et 8	Entre 8 et 9	Entre 8 et 9	Non	2		Oui		90	Non	1		Oui		90	Non	1
189	1	174		63	50- 59	4	1	5, 3	3	4	3		3	23:00:00	No	yes	No	No			189				5	3	0	0	0			189	Entre 6 et 7	Entre 7 et 8	Entre 8 et 9	Non	1		Oui		60	Non	1		Oui		60	Non	1
190	1	180		70	30-39	2	1	4, 2, 1	4	5	1		1	23:00:00	No	No	yes	No			190				0	3	2	0	0			190	Entre 7 et 8	Entre 7 et 8	Entre 7 et 8	Non	1		Oui		30	Non	1		Oui		30	Non	1
191	1	183		71	40-49	3	1	6, 4, 2	2	3	1		1	22:00:00	No	No	No	No			191				0	3	0	0	0			191	Entre 6 et 7	Entre 7 et 8	Entre 7 et 8	Oui		20	Oui		20	Oui		20	Oui		20	Oui
192	1	177		72	40-49	3	1	5, 3, 2	2	4	1		3	22:00:00	yes	No	No	No			192				0	4	0	0	<1			192	Entre 7 et 8	Entre 7 et 8	Entre 7 et 8	Non	2		Non			Non	1		Non	1		Non	1
193	1	183		67	18- 29	1	1	5, 3, 2	3	5	2		2	22:00:00	yes	No	yes	No			193	respiration abdominale	3		0	2	2	0	0			193	Entre 7 et 8	Entre 8 et 9	Entre 8 et 9	Oui		20	Oui		20	Oui		20	Non	1		Oui
194	1	180		79	30-39	2	3	0	4	5	2		3	23:00:00	No	No	No	No			194	Allonge yeux fermés et se concentre sur le calme	3		0	5	0	0	0			194	Entre 5 et 6	Entre 7 et 8	Entre 7 et 8	Oui		45	Non	1		Oui		45	Non	1		Oui
195	1	193		82	18- 29	1	1	3, 2, 1	2	3	2		3	23:00:00	No	yes	No	No			195	Pensées positives et d'extérieurs (sensation de glisse dans l'eau...)	3		0	2	0	0	1			195	Entre 8 et 9	Entre 9 et 10	Entre 9 et 10	Non	1		Oui		20	Non			Oui		20	Non	1
196	1	184		74	18- 29	1	1	3, 2, 1	2	3	1		2	22:00:00	No	No	No	No			196				0	6	0	0	0			196	Entre 7 et 8	Entre 9 et 10	Entre 9 et 10	Non	2		Non	1		Non	1		Oui		30	Oui
197	1	180		80	40-49	3	1	5, 3, 0	2	2	0		2	23:00:00	No	No	No	No			197	Je ferme les yeux et me rapproche de mon épouse.	5		0	0	10	0	0			197	Entre 7 et 8	Entre 7 et 8	Entre 7 et 8	Oui		10	Oui		10	Oui		10	Oui		10	Oui
198	1	170		66	40-49	3	1	6, 5, 3	2	3	3		1	22:00:00	No	No	No	No			198	la lecture	1		0	4	0	0	0			198	Entre 6 et 7	Entre 7 et 8	Entre 8 et 9	Oui		40	Oui		75	Oui		40	Oui		90	Oui
199	1	176		67	30-39	2	3	0	2	2	3		4	23:00:00	No	No	No	No			199				0	0	0	0/10	0			199	Entre 6 et 7	Entre 7 et 8	Entre 7 et 8	Oui		60	Non	1		Oui			Non	1		Oui
200	1	175		76	40-49	3	1	2	3	4	1		3	22:00:00	yes	yes	yes	yes	tricyclic antidepressant (TCA)		200				0	4	0	0	0			200	Entre 6 et 7	Entre 7 et 8	Entre 7 et 8	Non	2		Non	1		Non	1		Non	1		Non	1
201	1	177		71	30-39	2	4	5, 4, 2	3	4	2		2	22:00:00	yes	No	No	No			201				0	3	1	1	0			201	Entre 6 et 7	Entre 7 et 8	Entre 7 et 8	Oui		60	Non	1		Oui		45	Oui		45	Oui
202	1	180		70	30-39	2	1	4, 2	3	4	1		3	23:00:00	No	No	yes	No			202	Je me force à faire le vide dans ma tête. Cela consiste à se dire une routine "ne penses à rien, ne penses à rien..."	3		1	1	2	0	2			202	Entre 7 et 8	Entre 9 et 10	Entre 8 et 9	Non	3		Non	3		Non	3		Non	3		Non	3
203	1	186		82	30-39	2	1	5, 2	2	3	1		2	21:00:00	No	No	No	No			203				0	4	0	0	0			203	Entre 5 et 6	Entre 6 et 7	Entre 8 et 9	Non	1		Oui		45	Non	1		Oui		45	Non	1
204	1	182		77	40-49	3	1	5, 3	2	4	1		2	22:00:00	No	No	No	No			204				0	3	0	0	1			204	Entre 6 et 7	Entre 9 et 10	Entre 8 et 9	Oui		30	Oui		20	Oui		30	Oui		30	Oui
205	1	183		86	30-39	2	1	4	2	4	3		2	22:00:00	No	No	No	No			205				0	4	0	0	0			205	Entre 7 et 8	Entre 8 et 9	Entre 8 et 9	Non	2		Non	1		Non	1		Non	1		Non	1
206	1	176		76	40-49	3	1	2	2	3	1		2	22:00:00	yes	No	yes	No			206	tisanes	4		0	3	2	0	2			206	Entre 6 et 7	Entre 7 et 8	Entre 8 et 9	Non	3		Oui		60	Non	3		Oui		60	Non	3
207	2	158		47	30-39	2	1	4	4	6	2		2	22:00:00	No	No	yes	No			207	Lecture, iPhone, ordi portable...	1		0	5	0	0	0			207	Entre 6 et 7	Entre 7 et 8	Entre 8 et 9	Non	3		Non	3		Non	3		Non	3		Non	3
208	1	171		69	40-49	3	1	5, 2, 1	2	5	1		3	22:00:00	yes	No	No	No			208				0	0	0	2	0			208	Entre 6 et 7	Entre 7 et 8	Entre 7 et 8	Non	3		Non	1		Non	1		Non	1		Non	1
209	1	185		78	40-49	3	1	2	3	4	1		2	23:00:00	yes	No	No	No			209				0	5	0	0	0			209	Entre 6 et 7	Entre 9 et 10	Entre 8 et 9	Non	1		Oui		20	Non	1		Oui		30	Non	1
210	1	175		66	50- 59	4	1	4	4	5	1		4	21:00:00	No	No	yes	No			210				0	4	0	8	0			210	Entre 7 et 8	Entre 7 et 8	Entre 7 et 8	Non	3		Non	3		Non	3		Non	3		Non	3
211	1	182		74	18- 29	1	1	5, 2	3	4	2		2	22:00:00	yes	No	No	No			211				0	2	1	0	0			211	Entre 7 et 8	Entre 8 et 9	Entre 8 et 9	Non	1		Oui		60	Non	1		Oui		60	Non	1
212	1	192		82	40-49	3	1	2	2	4	1		2	23:00:00	No	No	No	No			212	Je lis 15mn maximum, j’éteins la lumière et en 2mn je dors!	1		0	0	0	0	0			212	Entre 6 et 7	Entre 8 et 9	Entre 8 et 9	Non	3		Oui		30	Non	3		Oui		30	Non	3
213	1	169		62	> 60	> 60	2	0	4	5	2		2	22:00:00	No	No	No	No			213				0	2	0	0	0			213	Entre 8 et 9	Entre 8 et 9	Entre 8 et 9	Non	2		Non	1		Non	1		Non	1		Non	retraité
214	1	180		70	40-49	3	1	0	1	2	2		4	23:00:00	No	yes	yes	yes	Larochelle		214				0	4	0	0	0			214	Entre 7 et 8	Entre 8 et 9	Entre 8 et 9	Non	3		Non	3		Non	3		Oui		30	Non	3
215	1	179		73	40-49	3	1	5, 3	4	5	2		4	00:00:00	No	yes	yes	No			215				0	0	0	3	0			215	Entre 6 et 7	Entre 6 et 7	Entre 7 et 8	Non	3		Non	3		Non	3		Non	3		Non	3
216	1	184		71	50- 59	4	3	0	4	5	2		2	21:00:00	No	No	No	No			216				0	2	1	0	0			216	Entre 7 et 8	Entre 8 et 9	Entre 8 et 9	Non	3		Non	1		Non	1		Non	1		Oui
217	1	185		77	30-39	2	1	5, 4, 1	1	2	3		2	23:00:00	yes	No	No	No			217	un peu de lecture, c'est très efficace...	1		4	3	3	1	1			217	Entre 6 et 7	Entre 9 et 10	Entre 9 et 10	Non	3		Oui		45	Non	3		Oui		45	Non	3
218	1	185		70	30-39	2	1	6, 5, 2	3	4	1		3	22:00:00	yes	No	yes	No			218	Grande facilité d'endormissement mais plusieurs réveils nocturnes	5		0	1	1	0	0			218	Entre 7 et 8	Entre 7 et 8	Entre 7 et 8	Non	1		Oui		30 à 2h	Non	1		Oui		30' à 2	Non	1
219	1	176		73	40-49	3	1	5, 3	4	5	3		1	22:00:00	No	No	yes	No			219				0	2	0	0	0			219	Entre 8 et 9	Entre 8 et 9	Entre 8 et 9	Non	2		Non	1		Non	1		Non	1		Non	3
220	1	184		75.9	40-49	3	1	5, 4, 3	2	3	3		2	22:00:00	No	No	No	No			220				0	3	1	0	0			220	Entre 6 et 7	Entre 7 et 8	Entre 7 et 8	Non	2		Non	1		Non	1		Non	1		Non	3
221	1	179		73	18- 29	1	1	5, 3	4	5	1		2	22:00:00	No	No	No	No			221				0	2	0	0	0			221	Entre 7 et 8	Entre 8 et 9	Entre 8 et 9	Non	3		Non	1		Non	3		Oui		30	Non	3
222	1	172		70	40-49	3	1	3, 2, 0	2	4	2		2	22:00:00	No	No	yes	No			222				0	2	0	0	0			222	Entre 8 et 9	Entre 8 et 9	Entre 8 et 9	Oui		60	Oui		60	Oui		60	Oui		60	Oui
223	1	183		72	30-39	2	1	5, 4, 3	3	4	1		2	22:00:00	yes	No	No	No			223				0	2	0	0	1			223	Entre 7 et 8	Entre 8 et 9	Entre 8 et 9	Non	1		Oui		15	Non	1		Oui		15	Non	1
224	1	183		75	40-49	3	1	4	3	4	2		3	23:00:00	No	No	No	No			224				25	8	0	0	3			224	Entre 7 et 8	Entre 8 et 9	Entre 8 et 9	Non	2		Non	1		Non	1		Non	1		Non	3
225	1	172		64	18- 29	1	3	0	3	5	2		2	22:00:00	No	No	No	No			225				10	5	0	0	0			225	Entre 6 et 7	<5	Entre 7 et 8	Non	2		Non	1		Non	1		Non	1		Oui
226	1	171		61	40-49	3	1	5, 3	4	6	2		1	21:00:00	No	No	No	No			226				0	0	1	0	1			226	Entre 9 et 10	Entre 9 et 10	Entre 9 et 10	Non	2		Non	1		Non	1		Non	1		Oui
227	1	186		76	30-39	2	3	0	2	3	3		2	22:00:00	No	No	yes	No			227				0	0	8	0	1			227	Entre 5 et 6	Entre 7 et 8	Entre 7 et 8	Oui		45	Oui		15	Oui		45	Non	1		Oui
228	1	179		73	18- 29	1	1	0	2	4	1		2	22:00:00	No	No	No	No			228				1	2	0	0	1			228	Entre 6 et 7	Entre 7 et 8	Entre 7 et 8	Oui		30	Non	1		Oui		30	Non	1		Oui
229	2	165		57	30-39	2	1	5, 2	3	4	2		1	21:00:00	No	No	yes	No			229				0	2	1	1	1			229	Entre 7 et 8	Entre 7 et 8	Entre 8 et 9	Oui		15	Oui		20	Oui		10	Oui		20	Oui
230	1	172		67	40-49	3	1	6, 3, 1	4	6	1		2	22:00:00	yes	No	No	No			230				0	5	0	0	0			230	Entre 5 et 6	Entre 5 et 6	Entre 6 et 7	Oui		60	Non	1		Non			Non			Non
231	1	168		72	30-39	2	3	5, 0	2	3	4		2	22:00:00	yes	No	No	No			231	pas de méthodes particulières. Je m'endors très facilement et très rapidement	5		0	0	0	0	0			231	Entre 6 et 7	Entre 7 et 8	Entre 7 et 8	Oui		20	Oui		20	Oui		30	Oui		20	Oui
232	1	181		74	30-39	2	1	6, 1	4	5	1		2	22:00:00	yes	No	No	No			232	la musique( banco de gaia,david lynch,pink floyd,chopin,) la respiration	2		0	2	2	0	0			232	Entre 6 et 7	Entre 6 et 7	Entre 6 et 7	Non	2		Non	1		Non	1		Non	1		Non	1
233	1	184		63	30-39	2	1	6, 5, 4	2	3	3		2	00:00:00	No	No	No	No			233				0	6	0	1	0			233	Entre 6 et 7	Entre 7 et 8	Entre 7 et 8	Non	3		Oui		15	Non	3		Oui		15	Non	3
234	1	178		73	30-39	2	1	5, 2	3	5	2		2	22:00:00	No	No	No	No			234				0	3	1	0	0			234	Entre 6 et 7	Entre 7 et 8	Entre 7 et 8	Non	3		Non	1		Non	1		Non	3		Non	3
235	1	174		72	30-39	2	1	6, 4, 2	4	6	2		2	23:00:00	No	No	No	No			235				0	5	1	0	0			235	Entre 7 et 8	Entre 7 et 8	Entre 8 et 9	Non	3		Non	3		Non	3		Non	3		Non	3
236	1	180		76	40-49	3	1	4, 2, 1	3	5	1		1	22:00:00	No	No	yes	No			236				0	0	0	0	1			236	Entre 6 et 7	Entre 7 et 8	Entre 8 et 9	Oui		30	Non	1		Oui		30	Non	1		Oui
237	1	180		80	40-49	3	1	0	3	4	1		3	23:00:00	No	No	No	No			237				0	4	0	1	0			237	Entre 6 et 7	Entre 8 et 9	Entre 8 et 9	Non	1		rarement		60	Non	1		rarement		60	Non	1
238	1	177		67	18- 29	1	1	6, 4, 2, 0	4	6	2		1	22:00:00	No	No	No	No			238				0	0	2	0	0			238	Entre 7 et 8	Entre 8 et 9	>10	Non	2		Non	1		Non	3		Oui		20	Non	3
239	1	181		74	30-39	2	1	1	2	3	2		1	00:00:00	No	No	No	No			239				0	5	0	2	0			239	Entre 6 et 7	Entre 9 et 10	Entre 9 et 10	Non	1		Oui		20	Non	1		Oui		20	Non	1
240	1	176		89	40-49	3	1	6, 1	2	3	3		2	23:00:00	No	No	No	No			240				0	4	2	0	1			240	Entre 5 et 6	Entre 5 et 6	Entre 5 et 6	Oui		30	Oui		20	Oui		20	Oui		20	Oui
241	1	179		75	18- 29	1	1	0	2	5	0		2	23:00:00	No	No	No	No			241				0	4	0	0	0			241	Entre 7 et 8	Entre 9 et 10	Entre 9 et 10	Non	3		Non	1		Non	3		Non	1		Non	3
242	1	176		70	> 60	> 60	2	5, 3	3	3	1		3	23:00:00	No	No	No	No			242				0	1	0	0	0			242	Entre 7 et 8	Entre 7 et 8	Entre 7 et 8	Non			Non			Non			Non			Non
243	1	163		62	40-49	3	1	5, 2, 1	2	3	0		2	20:00:00	No	No	No	No			243				0	2	0	0	0			243	Entre 6 et 7	Entre 6 et 7	Entre 7 et 8	Non	2		Non	3		Non	1		Non	1		Non	1
244	1	176		84	50- 59	4	1	6, 1	2	3	2		2	22:00:00	yes	No	No	No			244				0	3	0	1	1			244	Entre 6 et 7	Entre 6 et 7	Entre 6 et 7	Non	1		Oui		15	Non	1		Oui		15	Non	1
245	1	170		66	40-49	3	1	6, 5, 4	3	4	4		2	20:00:00	No	No	No	No			245				0	0	2	0	0			245	Entre 7 et 8	Entre 7 et 8	Entre 7 et 8	Non	2		Non	1		Non	1		Non	1		Non	1
246	1	170		60	40-49	3	1	4, 2	3	5	1		2	22:00:00	yes	yes	No	No			246				0	0	1	0	0			246	Entre 7 et 8	Entre 8 et 9	Entre 8 et 9	Non	1		Oui		60	Non	1		Oui		60	Non
247	1	174		63	40-49	3	1	4	3	4	3		2	22:00:00	No	No	yes	No			247				0	1	2	0	0			247	Entre 7 et 8	Entre 7 et 8	Entre 8 et 9	Oui		20	Oui		20	Non	3		Oui		30	Oui
248	1	177		71	40-49	3	1	4	3	3	2		2	23:00:00	No	No	No	No			248				0	5	0	0	0			248	Entre 6 et 7	Entre 6 et 7	Entre 6 et 7	Non	3		Oui		60	Non	3		Oui		60	Non	3
249	1	183		73	30-39	2	1	5, 4	2	3	3		2	21:00:00	No	No	No	No			249				0	3	1	0	0			249	Entre 8 et 9	Entre 8 et 9	Entre 8 et 9	Non	2		Non	1		Non	3		Oui		90	Non	3
250	2	163		52	50- 59	4	1	5, 3	1	2	1		2	20:00:00	No	yes	yes	yes	melatonin		250	musique fréquences adaptées + respirations	2		0	0	0	0	0			250	Entre 7 et 8	Entre 7 et 8	Entre 7 et 8	Non	2		Non	1		Non	1		Non	1		Non	1
251	1	182		81	30-39	2	1	5, 4, 2	3	5	1		3	22:00:00	No	No	No	No			251				0	0	0	0	0			251	Entre 7 et 8	Entre 7 et 8	Entre 8 et 9	Non	2		Non	1		Non	1		Non	1		Non	3
252	1	178		72	40-49	3	1	6, 4, 1	2	4	1		2	22:00:00	No	No	No	No			252				0	0	0	0	0			252	Entre 6 et 7	Entre 7 et 8	Entre 7 et 8	Non	1		Oui		10	Non	1		Oui		10	Non	1
253	1	178		65	30-39	2	1	6, 1, 0	2	3	1		2	23:00:00	No	No	No	No			253	Je ferme les yeux... et je m'endors !	5		0	1	2	0	<1			253	Entre 6 et 7	Entre 6 et 7	Entre 7 et 8	Non	3		Oui		15	Non	3		Oui		15	Non	3
254	1	175		60	30-39	2	1	5, 4, 2	3	5	2		2	23:00:00	No	No	No	No			254	Lecture 1/4h	1		0	0	2	0	0			254	Entre 7 et 8	Entre 9 et 10	Entre 9 et 10	Non	2		Non	1		Non	1		Non	1		Non	1
255	1	185		81	50- 59	4	1	5, 4, 2	2	3	1		4	>00:00	No	No	No	No			255				0	6	1	0	2			255	Entre 6 et 7	Entre 7 et 8	Entre 8 et 9	Non	1		rarement		60	Non	3		rarement			Non	1
256	1	171		64	50- 59	4	1	4, 2	2	3	2		2	21:00:00	No	No	No	No			256				0	2	0	0	1			256	Entre 8 et 9	Entre 8 et 9	Entre 8 et 9	Non	1		Oui		20	Non	1		Oui		20	Non	1
257	1	185		78	30-39	2	1	6, 4, 1	2	3	1		2	23:00:00	No	No	No	No			257				0	3	0	0	0			257	Entre 5 et 6	Entre 6 et 7	Entre 6 et 7	Non	3		Non	3		Non	3		Oui		60	Non	3
258	1	171		64	50- 59	4	1	6, 5	3	5	1		3	0.916667	No	No	No	No			258				0	2	0	0	0			258	Entre 7 et 8	Entre 7 et 8	Entre 7 et 8	Non	2		Non	1		Non	1		Non	1		Non	1
259	1	188		82	30-39	2	1	2, 0	2	3	2		2	23:00:00	yes	No	yes	No			259				0	0	0	5	0			259	Entre 7 et 8	Entre 8 et 9	Entre 7 et 8	Non	1		Non	1		Non	3		Non	1		Non	3
260	2	157		53	40-49	3	1	2, 0	2	3	1		2	23:00:00	No	No	yes	No			260	relâchement corporel, type sophrologie	3		0	4	6	0	0			260	Entre 7 et 8	Entre 7 et 8	Entre 8 et 9	Non	3		Oui		20	Non	3		Oui		20	Oui
261	1	176		78	40-49	3	1	0	2	3	2		1	23:00:00	yes	No	No	No			261				8	5	0	0	0			261	Entre 6 et 7	Entre 7 et 8	Entre 8 et 9	Oui		60	Oui		60	Oui		60	Oui		60	Oui
262	1	171		60	50- 59	4	2	5, 3	3	4	2		2	23:00:00	No	No	No	No			262				0	0	0	0	0			262	Entre 8 et 9	Entre 8 et 9	Entre 8 et 9	Non			Non	1		Non			Non	1		Non
263	1	178		72	40-49	3	1	1	2	4	4		2	23:00:00	No	No	yes	No			263				0	1	3	0	0			263	Entre 6 et 7	Entre 6 et 7	Entre 8 et 9	Oui		20	Oui		60	Oui		20	Oui		60	Oui
264	1	172		62	40-49	3	1	5, 4, 2	3	4	2		1	21:00:00	No	No	No	No			264				0	1	0	0	0			264	Entre 7 et 8	Entre 8 et 9	Entre 8 et 9	Non	3		Oui		30	Non	3		Oui		30	Non	3
265	1	178		82	40-49	3	1	0	2	3	2		3	23:00:00	yes	No	No	No			265				5	4	0	0	0			265	Entre 6 et 7	Entre 6 et 7	Entre 7 et 8	Non	3		Oui		45	Non	3		Oui		45	Non
266	1	175		60	40-49	3	1	5, 4, 3	3	4	3		2	22:00:00	yes	No	No	No			266				0	1	0	0	0			266	Entre 7 et 8	Entre 8 et 9	Entre 8 et 9	Non	3		Non	1		Non	3		Oui		60	Non	3
267	1	176		72	30-39	2	1	2	2	3	2		3	23:00:00	No	No	yes	yes	Phytotherapy, food complement		267	- je note tout ce que j'ai dans la tete avant de me coucher - je range tout avant de me coucher - je me relaxe avec une douche	4		0	1	0	0	0			267	Entre 7 et 8	Entre 8 et 9	Entre 7 et 8	Oui		15	Oui		60	Oui		20	Oui		60	Oui
268	2	163		57	> 60	> 60	2	5, 4, 3, 0	3	4	2		2	20:00:00	No	No	No	No			268				0	3	11	0	0			268	Entre 7 et 8	Entre 7 et 8	Entre 7 et 8	Non	2		Non	1		Non	1		Non	1		Non	1
269	1	185		75	40-49	3	1	5, 2	2	4	2		1	22:00:00	No	No	No	No			269				0	4	0	0	0			269	Entre 7 et 8	Entre 7 et 8	Entre 8 et 9	rarement		15	Non	1		rarement		15	Non	1		Oui
270	1	168		59	40-49	3	1	0	3	5	2		3	23:00:00	No	No	No	No			270				0	2	2	0	2			270	Entre 6 et 7	Entre 7 et 8	Entre 7 et 8	Non	2		Non	1		Non	1		Non	1		Non	1
271	1	178		62	30-39	2	1	2	2	3	2		3	23:00:00	No	No	No	No			271				0	2	2	0	0			271	Entre 6 et 7	Entre 9 et 10	Entre 8 et 9	Non	1		Non	3		Non	1		Non	3		Non	1
272	1	184		70	30-39	2	1	4, 2	1	3	0		1	23:00:00	No	No	No	No			272				0	<1	1	0	0			272	Entre 7 et 8	Entre 8 et 9	Entre 8 et 9	Non	2		Non	1		Non	1		Non	1		Non	1
273	1	180		84	50- 59	4	1	4	2	3	1		2	21:00:00	No	No	No	No			273				0	6	0	0	0			273	Entre 6 et 7	Entre 6 et 7	Entre 6 et 7	Non	2		Oui		30	Non	1		Oui		30	Non	1
274	2			92	> 60	> 60	4	0	6	6	3		1	20:00:00	No	No	No	No			274				0	1	0	0	0			274	Entre 5 et 6	Entre 5 et 6	Entre 5 et 6	Non	2		Non	1		Non	1		Non			Non	1
275	1	176		60	30-39	2	1	5, 3, 2	4	5	0		1	21:00:00	No	No	yes	No			275				0	2	0	0	0			275	Entre 8 et 9	Entre 8 et 9	Entre 8 et 9	Non	2		Non	1		Non	1		Non			Non	1
276	1	185		72	40-49	3	1	0	2	3	2		2	23:00:00	No	No	No	No			276				0	3	4	0	2			276	Entre 6 et 7	Entre 7 et 8	Entre 8 et 9	Non	2		Oui		30	Non	1		Oui		30	Non	1
277	1	182		82	40-49	3	1	5, 2	3	4	2		2	21:00:00	No	No	No	No			277				0	3	2	0	0			277	Entre 8 et 9	Entre 8 et 9	Entre 8 et 9	Non	2		Non	1		Non	1		Non	1		Non	3
278	2	165		48	30-39	2	1	6, 5, 4	2	3	1		1	22:00:00	No	No	No	No			278	Quelques pages de lecture	1		0	0	2	0	0			278	Entre 6 et 7	Entre 6 et 7	Entre 6 et 7	Non	1		Oui		20	Non	1		Oui		20	Non	1
279	1	168		71	> 60	> 60	2	5, 3	2	3	1		2	23:00:00	No	No	No	No			279				0	1	3	0	0			279	Entre 6 et 7	Entre 6 et 7	Entre 6 et 7	Oui		25	Oui			Oui		5 à 10	Oui		25	Oui
280	1	184		72	40-49	3	1	0	4	5	4		2	21:00:00	yes	No	No	No			280				0	3	1	0	0			280	Entre 7 et 8	Entre 8 et 9	Entre 8 et 9	Non	3		Oui		60	Non			Non			Non
281	1	183		70	30-39	2	1	2	4	5	3		2	22:00:00	No	No	No	No			281				0	2	0	0	1			281	Entre 7 et 8	Entre 8 et 9	Entre 8 et 9	Non	3		Oui		20	Non			Oui		20	Non	3
282	1	173		60	50- 59	4	1	6, 4	5	6	4		1	21:00:00	No	No	No	No			282				0	4	0	0	0			282	Entre 6 et 7	Entre 7 et 8	Entre 7 et 8	Non	2		Non	1		Non	1		Non	1		Non	1
283	1	180		68	> 60	> 60	2	5	2	3	3		3	21:00:00	No	No	No	No			283				0	2	0	1	1			283	Entre 8 et 9	Entre 8 et 9	Entre 8 et 9	Non	2		Non	1		Non	1		Non	1		Non	1
284	1	185		79	50- 59	4	1	5, 1	1	2	2		1	22:00:00	yes	No	No	No			284				1	2	2	0	0			284	Entre 6 et 7	Entre 7 et 8	Entre 7 et 8	Non	2		Non	1		Non	1		Non	1		Non	1
285	1	179		76	50- 59	4	1	6, 5	4	4	1		1	21:00:00	No	No	No	No			285				0	7	0	0	0			285	Entre 6 et 7	Entre 7 et 8	Entre 7 et 8	Non	2		Non	1		Non	1		Non	1		Non	3
286	1	173		65	40-49	3	1	5, 4	2	3	>5		3	22:00:00	yes	No	No	No			286	Musique de relaxation Lecture Vidéo	2		0	0	1	0	0			286	Entre 6 et 7	Entre 7 et 8	Entre 7 et 8	Non	3		Oui		20	Non	3		Oui		30	Non	3
287	2	170		55	40-49	3	1	5, 2	4	4	0		3	22:00:00	No	No	No	No			287	la lecture	1		0	1	1	1	1			287	Entre 7 et 8	Entre 8 et 9	Entre 8 et 9	Non	2		Non	1		Non	1		Non	1		Oui
288	1	180		72	40-49	3	1	4	2	3	3		2	00:00:00	No	No	No	No			288				0	1	2	0	1			288	Entre 5 et 6	Entre 6 et 7	Entre 6 et 7	Non	1		Non	1		Non	1		Non	1		Non	1
289	1	184		70	30-39	2	1	4	3	4	2		1	21:00:00	No	No	No	No			289				0	0	5	0	0			289	Entre 6 et 7	Entre 7 et 8	Entre 6 et 7	Non	1		Oui		20	Non	1		Oui		30	Non	1
290	1	167		62	30-39	2	1	2	3	5	3		4	>00:00	yes	No	yes	No			290	concentration sur la respiration	3		0	4	0	2	0			290	Entre 6 et 7	Entre 7 et 8	Entre 7 et 8	Non	3		Non	1		Non	1		Non	1		Non	3
291	1	178		75	30-39	2	1	3	3	5	0		4	21:00:00	No	No	No	No			291				0	5	0	0	0			291	Entre 6 et 7	Entre 8 et 9	Entre 8 et 9	Non	3		Oui		30	Non	3		Oui		30	Non	3
292	1	175		62	30-39	2	1	0	3	5	3		2	22:00:00	yes	No	yes	No			292				0	3	0	0	0			292	Entre 5 et 6	Entre 6 et 7	Entre 6 et 7	Oui		30	Non	1		Oui		30	Oui		20	Oui
293	1	170		65	40-49	3	4	5	3	5	2		2	22:00:00	No	No	No	No			293				0	0	2	0	0			293	Entre 7 et 8	Entre 7 et 8	Entre 8 et 9	Non	2		Oui		30	Oui		15	Oui		30	Non	3
294	1	176		67	40-49	3	1	6, 5, 1, 0	3	6	1		3	00:00:00	No	No	No	No			294				0	5	0	0	1			294	Entre 7 et 8	Entre 7 et 8	Entre 7 et 8	Non	1		Non	1		Non	1		Non	1		Non	1
295	1	179		64	50- 59	4	1	3	2	3	2		2	21:00:00	No	No	No	No			295	J'évite de ressasser les problèmes	5		0	1	1	1	<1			295	Entre 6 et 7	Entre 7 et 8	Entre 7 et 8	Oui		35	Oui		40	Oui		35	Oui		35	Oui
296	1	180		81	40-49	3	1	6, 4, 1	2	3	3		2	22:00:00	No	No	No	No			296				0	9	0	2	<1			296	Entre 6 et 7	Entre 7 et 8	Entre 7 et 8	Non	2		Non	1		Non	1		Non	1		Non	1
297	1	182		65	50- 59	4	1	5, 4, 1	3	4	2		3	23:00:00	No	No	No	No			297				0	2	0	0	<1			297	Entre 7 et 8	Entre 8 et 9	Entre 8 et 9	Non	3		Non	pas l'habitude...		Non	3		rarement		30	Non	3
298	1	180		75	30-39	2	1	4, 2	2	3	3		1	22:00:00	yes	No	No	No			298				0	2	1	1	2			298	Entre 7 et 8	Entre 8 et 9	Entre 9 et 10	Non	3		Non	3		Non	3		Non	3		Non	3
299	1	186		80	30-39	2	1	5, 4, 0	2	4	0		2	23:00:00	No	No	No	No			299				0	2	0	0	0			299	Entre 7 et 8	Entre 9 et 10	Entre 9 et 10	Non	3		Non	3		Non	3		Non	3		Non	3
300	1	170		56	40-49	3	1	5, 4, 2	2	3	1		1	21:00:00	No	No	No	No			300				0	3	0	0	5			300	Entre 7 et 8	Entre 8 et 9	Entre 8 et 9	Oui		50	Oui		50	Oui		50	Oui		50	Oui
301	1	182		75	30-39	2	1	2	3	5	0		2	22:00:00	No	No	No	No			301				0	1	1	0	1			301	Entre 7 et 8	Entre 7 et 8	Entre 7 et 8	Oui		15	Oui		15	Oui		15	Oui		15	Oui
302	2	165		54	40-49	3	1	0	3	5	2		2	22:00:00	No	yes	No	No			302				0	6	0	0	0			302	Entre 6 et 7	Entre 6 et 7	Entre 6 et 7	Non	3		Non	3		Non	3		Non	3		Non
303	1	174		69	40-49	3	1	2	3	4	2		3	23:00:00	No	No	No	No			303				0	1	0	0	0			303	Entre 6 et 7	Entre 7 et 8	Entre 7 et 8	Oui		15	Oui		20	Oui		15	Oui		20	Oui
304	1	175		72	30-39	2	1	6, 4, 1	3	5	2		3	21:00:00	No	No	No	No			304				0	0	0	0	4			304	Entre 6 et 7	Entre 7 et 8	Entre 8 et 9	Non	2		Non	1		Non	1		Non	1		Oui
305	1	175		68	40-49	3	1	5, 2	3	5	2		2	22:00:00	yes	No	No	No			305				0	2	1	0	0			305	Entre 7 et 8	Entre 7 et 8	Entre 7 et 8	Oui		15	Oui			Oui		15	Oui		15	Oui
306	1	173		65	18- 29	1	1	0	1	2	3		1	22:00:00	No	No	No	No			306				0	0	1	1	0			306	Entre 7 et 8	Entre 9 et 10	Entre 9 et 10	Non	3		Oui		60	Non	3		Non	3		Non	3
307	1	180		74	40-49	3	1	6, 5	2	3	1		2	22:00:00	No	No	No	No			307				0	1	0	0	0			307	Entre 8 et 9	Entre 8 et 9	Entre 8 et 9	Non	2		Non	1		Non	1		Non	1		Non	3
308	2	163		54	40-49	3	1	3	2	3	1		4	23:00:00	No	No	No	No			308				0	0	0	0	0			308	Entre 6 et 7	Entre 7 et 8	Entre 8 et 9	Non			Non			Non			Non			Non
309	1	172		72	30-39	2	1	3, 2	3	4	0		2	21:00:00	No	No	No	No			309	Ecouter une radio	2		0	2	0	0	0			309	Entre 7 et 8	Entre 7 et 8	Entre 8 et 9	Non	1		Oui		60	Non	1		Oui		60	Non	1
310	1	185		77	40-49	3	1	3	2	5	1		2	22:00:00	No	No	No	No			310				0	1	4	0	0			310	Entre 6 et 7	Entre 7 et 8	Entre 8 et 9	Non	3		Oui		20	Non	3		Oui		20	Non	3
311	1	185		84	18- 29	1	1	6	2	3	2		2	22:00:00	No	No	No	No			311				0	0	0	0	1			311	Entre 7 et 8	Entre 7 et 8	Entre 8 et 9	Oui		10	Non	1		Non	1		Oui		60	Non	1
312	1	182		75	50- 59	4	1	5, 4	2	4	0		3	21:00:00	yes	No	No	No			312				0	3	0	0	0			312	Entre 7 et 8	Entre 7 et 8	Entre 9 et 10	Oui		15	Oui		15	Non	3		Oui		15	Non	3
313	1	171		60	50- 59	4	1	6, 5, 3, 0	4	5	1		3	23:00:00	No	No	No	No			313				0	1	4	0	0			313	Entre 6 et 7	Entre 6 et 7	Entre 6 et 7	Oui		30	Oui		30	Oui		30	Oui		30	Oui
314	1	167		62	30-39	2	1	5, 4	3	4	2		3	23:00:00	No	No	No	No			314				0	0	2	0	0			314	Entre 7 et 8	Entre 7 et 8	Entre 7 et 8	Non	3		Oui		20	Non	3		Oui		20	Non	3
315	1	170		59	40-49	3	1	4	4	6	1		2	23:00:00	No	No	No	No			315	étirement puis dodo	3		0	0	0	0	0			315	Entre 6 et 7	Entre 7 et 8	Entre 8 et 9	Non	2		Non	1		Non	1		Non	1		Non	1
316	2	168		44	30-39	2	1	0	6	6	3		1	22:00:00	No	No	No	No			316				0	2	2	0	0			316	Entre 7 et 8	Entre 8 et 9	Entre 8 et 9	Non	3		Non	3		Non			Non	je ne m'en donne pas trop le droit		Non	3
317	1	171		65	30-39	2	1	3	3	5	3		3	22:00:00	No	No	No	No			317	Aucune	5		0	3	0	0	0			317	Entre 7 et 8	Entre 7 et 8	Entre 7 et 8	Non	2		Oui		90	Non	1		Oui		90	Non	3
318	1	172		65	50- 59	4	1	4, 2	3	4	1		1	22:00:00	No	No	No	No			318				0	1	0	0	1			318	Entre 7 et 8	Entre 8 et 9	Entre 8 et 9	Non	2		Non			Non	3		Oui		30	Non	3
319	2	170		53	40-49	3	2	3, 2	3	6	1		2	22:00:00	No	yes	yes	No			319				0	3	0	0	0			319	Entre 6 et 7	Entre 7 et 8	Entre 7 et 8	Non	3		Non	1		Non	1		Non	1		Oui
320	1	175		68	30-39	2	1	6	3	5	3		2	22:00:00	No	No	No	No			320				0	1	1	0	1			320	Entre 7 et 8	Entre 7 et 8	Entre 7 et 8	Non	3		Non	3		Non	3		Non	3		Non	3
321	1	181		78	50- 59	4	1	2	4	6	2		2	22:00:00	No	No	No	No			321				0	0	1	0	0			321	Entre 5 et 6	Entre 5 et 6	Entre 5 et 6	Oui		15	Oui		15	Oui		15	Oui		15	Oui
322	1	175		70	30-39	2	4	3, 2	3	5	2		2	na	No	No	No	No			322				0	5	0	0	0			322	Entre 5 et 6	Entre 6 et 7	Entre 8 et 9	Non	2		Non	1		Non	1		Non	1		Non	1
323	1	172		61	40-49	3	1	3	4	6	4		3	22:00:00	No	No	No	No			323	aucune	5		0	0	1	0	0			323	Entre 7 et 8	Entre 7 et 8	Entre 7 et 8	Non	2		Non	1		Non	1		Non	1		Non	1
324	1	177		71	30-39	2	1	2, 1	2	4	3		2	00:00:00	No	No	No	No			324	la lecture si besoin ou rien!	1		0	0	1	0	0			324	Entre 6 et 7	Entre 7 et 8	Entre 7 et 8	Non	3		Non	1		Non	3		Non	1		Oui
325	1	175		70	50- 59	4	1	2	1	2	3		1	20:00:00	yes	yes	yes	No			325				0	0	1	0	0			325	Entre 6 et 7	Entre 6 et 7	Entre 7 et 8	Oui		15	Oui		20	Oui		15	Oui		15	Oui
326	1	169		63	40-49	3	1	4	3	3	0		2	22:00:00	No	No	No	No			326	Je ferme les yeux et je dors...instantanément...	5		0	3	0	0	1			326	Entre 7 et 8	Entre 7 et 8	Entre 8 et 9	Non	1		Oui		30	Non	1		Oui		30	Non	1
327	1	175		65	40-49	3	1	2	2	4	1		2	23:00:00	No	No	No	No			327				0	1	1	0	0			327	Entre 7 et 8	Entre 8 et 9	Entre 9 et 10	Non	3		Oui		60	Non	3		Oui		60	Non	3
328	1	174		70	40-49	3	1	3, 2, 1	3	5	2		2	22:00:00	yes	No	No	No			328				0	<1	3	0	0			328	Entre 5 et 6	Entre 8 et 9	Entre 9 et 10	Non	2		Non	1		Oui		15	Non	1		Oui
329	1	182		71	50- 59	4	1	5, 3	2	3	1		2	22:00:00	No	No	yes	No			329				0	4	0	0	<1			329	Entre 5 et 6	Entre 6 et 7	Entre 7 et 8	Non	je n ai pas eu l habitude		Non	1		Non	3		Non	1		Non	3
330	1	177		76	30-39	2	1	5, 3, 2	3	5	2		2	21:00:00	No	No	No	No			330				0	0	0	2	0			330	Entre 7 et 8	Entre 9 et 10	Entre 9 et 10	Oui		45	Oui		45	Oui		45	Oui		45	Oui
331	2	163		61	40-49	3	4	5, 3	2	3	2		1	20:00:00	No	No	No	No			331				0	5	0	0	0			331	Entre 5 et 6	Entre 8 et 9	Entre 8 et 9	Oui		130	Oui		90	Oui		120	Oui		90	Oui
332	1	166		60	50- 59	4	1	3, 2, 1	2	4	1		2	23:00:00	No	No	No	No			332				0	3	1	0	0			332	Entre 7 et 8	Entre 8 et 9	Entre 8 et 9	Non	2		Non	1		Non	1		Non	1		Non	1
333	1	176		65	40-49	3	1	2	3	5	1		3	22:00:00	No	No	yes	No			333	la lecture	1		0	2	0	0	1			333	Entre 6 et 7	Entre 6 et 7	Entre 6 et 7	Oui		45	Oui		45	Oui		45	Oui		45	Oui
334	2	161		53	18- 29	1	1	5, 2	2	3	2		2	22:00:00	No	No	No	No			334				0	3	0	0	0			334	Entre 8 et 9	Entre 8 et 9	Entre 8 et 9	Non	3		Oui		25	Non	3		Oui		25	Oui
335	1	170		59	40-49	3	2	0	4	5	1		2	23:00:00	No	No	No	No			335				0	1	0	0	0			335	Entre 5 et 6	Entre 5 et 6	Entre 5 et 6	Oui		25	Oui		25	Oui		25	Oui		25	Oui
336	1	174		63	18- 29	1	1	4, 2	4	5	1		2	22:00:00	No	No	No	No			336				0	2	1	0	0			336	Entre 6 et 7	Entre 8 et 9	Entre 7 et 8	Non	2		Non	1		Non	3		Oui		60	Non	3
337	1	191		77	40-49	3	1	5, 2, 1	3	4	1		3	23:00:00	No	No	No	No			337				0	5	2	0	0			337	Entre 7 et 8	Entre 8 et 9	Entre 8 et 9	Non	2		Non	1		Non	1		Non	1		Non	1
338	1	172		62	40-49	3	1	2	2	3	1		2	22:00:00	yes	No	yes	No			338				0	0	0	0	0			338	Entre 8 et 9	Entre 8 et 9	Entre 9 et 10	Non	2		Non	1		Oui		30	Oui		30	Oui
339	1	182		73	30-39	2	1	6, 5, 2	4	5	2		2	21:00:00	No	No	No	No			339				0	0	0	0	0			339	Entre 7 et 8	Entre 8 et 9	Entre 7 et 8	Oui		25	rarement		30	Oui		20	Oui		30	Oui
340	2	162		54	30-39	2	1	5, 2	3	4	2		1	22:00:00	No	No	No	No			340				0	0	2	0	0			340	Entre 7 et 8	Entre 9 et 10	Entre 9 et 10	Non	1		Oui		45	Non	1		Oui		90	Non	1
341	1	183		82	18- 29	1	1	5, 2, 1	2	2	1		2	22:00:00	No	No	No	No			341				0	1	0	0	1			341	Entre 5 et 6	Entre 7 et 8	Entre 7 et 8	Oui		15	Non	1		Non	3		Non	1		Non	3
342	2	170		55	50- 59	4	1	5, 3, 2	3	4	1		2	22:00:00	No	No	No	No			342				0	0	1	0	0			342	Entre 7 et 8	Entre 8 et 9	Entre 8 et 9	Non	2		Non	1		Oui		15	Oui		15	Oui
343	2	175		56	40-49	3	1	6, 4, 2	2	2	2		2	23:00:00	No	yes	yes	No			343				0	6	0	0	0			343	Entre 6 et 7	Entre 7 et 8	Entre 8 et 9	Non	1		Non	3r de ne pas dormir		Non	1		Non	3r de ne pas dormir		Non	1
344	1	174		77	30-39	2	3	5, 3, 2	2	3	2		2	>00:00	No	No	No	No			344				0	1	0	0	0			344	Entre 6 et 7	Entre 7 et 8	Entre 7 et 8	Oui		30	Oui		20	Oui		30	Oui		20	Oui
345	1	183		79	40-49	3	1	6, 5, 2	2	4	1		3	22:00:00	No	No	No	No			345	Lecture	1		0	2	3	0	0			345	Entre 6 et 7	Entre 7 et 8	Entre 7 et 8	Non	1		Oui		45	Non	1		Oui		45	Non	1
346	1	180		79	18- 29	1	1	5, 2	4	5	2		4	22:00:00	yes	No	No	No			346				0	1	0	0	0			346	Entre 7 et 8	Entre 7 et 8	Entre 8 et 9	Oui		30	Non	1		Oui		30	Non	1		Oui
347	1	180		79	18- 29	1	1	5, 2	4	5	0		4	22:00:00	yes	No	No	No			347				0	1	0	0	0			347	Entre 7 et 8	Entre 7 et 8	Entre 8 et 9	Oui		30	Non	1		Oui		30	Non	1		Oui
348	1	171		64	40-49	3	1	4, 1, 0	3	6	1		3	23:00:00	No	yes	yes	No			348				0	0	4	0	0			348	Entre 7 et 8	Entre 8 et 9	Entre 9 et 10	Non	1		Non	Je n'aime pas faire la sieste car le soir j'ai du mal à dormir		Non	n'aime pas faire la sieste car peur de ne pas dormir		Non	n'aime pas faire la sieste car peur de ne pas dormir		Non	Même chose
349	1	183		85	50- 59	4	1	6, 2	2	5	2		2	21:00:00	No	No	No	No			349				0	3	1	0	0			349	Entre 6 et 7	Entre 6 et 7	Entre 7 et 8	Non	2		Non	1		Non	1		Non	1		Oui
350	2	173		57	50- 59	4	1	2	3	4	3		3	23:00:00	No	No	No	No			350				0	1	0	1	0			350	Entre 6 et 7	Entre 6 et 7	Entre 6 et 7	Non	3		Non	1		Non	1		Non	1		Non	1
351	1	177		72	40-49	3	1	5, 2	3	5	2		2	22:00:00	No	No	yes	No			351				0	4	1	0	1			351	Entre 7 et 8	Entre 7 et 8	Entre 7 et 8	Non	2		Non	1		Non	1		Non	1		Non	3
352	1	178		76	40-49	3	1	3	1	3	1		3	>00:00	No	No	No	No			352				0	2	1	0	1			352	Entre 5 et 6	Entre 7 et 8	Entre 7 et 8	Non	3		Non	3		Non	3		Non	3		Non	3
353	1	178		81	50- 59	4	1	2, 1	2	3	2		2	23:00:00	No	No	No	No			353				0	4	0	0	1			353	Entre 6 et 7	Entre 6 et 7	Entre 7 et 8	Non	3		Non	1		Non	3		Non	1		Non	3
354	1	187		89	50- 59	4	1	4, 1	2	3	2		1	23:00:00	No	No	No	No			354				0	3	1	0	0			354	Entre 5 et 6	Entre 7 et 8	Entre 7 et 8	Oui		10	Oui		10	Oui		10	Non	1		Oui
355	2	154		48	40-49	3	1	5, 4	2	4	3		2	22:00:00	yes	No	No	No			355				0	4	1	0	0			355	Entre 6 et 7	Entre 7 et 8	Entre 8 et 9	Non	2		Non	1		Non	1		Non	1		Non	1
356	1	177		81	40-49	3	1	3	2	3	1		1	22:00:00	No	No	No	No			356				0	3	0	0	1			356	Entre 7 et 8	Entre 7 et 8	Entre 8 et 9	Non	2		Oui		60	Non	1		Non	1		Non	3
357	1	176		67	40-49	3	1	5	3	5	2		1	21:00:00	No	No	No	No			357				4	3	0	1	1			357	Entre 7 et 8	Entre 7 et 8	Entre 7 et 8	Non	1		Oui		30	Non	1		Oui		30	Non	1
358	1	172		67	40-49	3	1	0	4	5	0		3	21:00:00	yes	No	No	No			358				0	4	0	0	0			358	Entre 7 et 8	Entre 7 et 8	Entre 7 et 8	Non	3		Non	3		Non	3		Non	3		Non	3
359	1	172		63	40-49	3	1	5	3	4	1		2	23:00:00	No	No	No	No			359				0	2	0	0	1			359	Entre 7 et 8	Entre 8 et 9	Entre 8 et 9	Non	2		Non	1		Non	1		Non	1		Non	3
360	1	184		71	30-39	2	1	5, 4, 2	3	4	2		1	21:00:00	No	No	yes	No			360	je me concentre sur la respiration, exercices de remobilisation et concentration expliqué dans le livre "ultra trail"	3		0	0	0	0	0			360	Entre 7 et 8	Entre 8 et 9	Entre 9 et 10	Non	1		Oui		20	Non	1		Oui		20	Non	1
361	1	188		82	30-39	2	1	5, 3	4	5	2		3	22:00:00	No	No	No	No			361				0	1	1	0	1			361	Entre 5 et 6	Entre 7 et 8	Entre 7 et 8	Oui		20	Oui		60	Oui		20	Oui		60	Oui
362	1	180		65	40-49	3	1	3	2	2	1		1	21:00:00	No	No	No	No			362				0	3	2	0	0			362	Entre 7 et 8	Entre 8 et 9	Entre 8 et 9	Non	1		Non	3		Non	1		Non	3		Non	1
363	1	172		83	30-39	2	1	6, 5, 2, 1	2	4	2		2	23:00:00	yes	No	No	No			363				0	2	0	0	0			363	Entre 5 et 6	Entre 6 et 7	Entre 7 et 8	Non	3		Non	3		Oui		60	Non	3		Non	3
364	2	167		57	30-39	2	1	5, 3	2	3	0		2	22:00:00	No	No	No	No			364				0	0	2	0	0			364	Entre 6 et 7	Entre 7 et 8	Entre 7 et 8	Oui		60	Oui		60	Oui		60	Non	1		Oui
365	1	177		74	40-49	3	1	0	4	6	3		4	21:00:00	No	No	No	No			365				0	5	1	1	0			365	Entre 7 et 8	Entre 8 et 9	Entre 8 et 9	Non	2		Non	1		Non	1		Non	1		Oui
366	1	171		65	40-49	3	1	6, 4, 2	2	3	1		3	23:00:00	No	No	No	No			366				0	1	2	0	0			366	Entre 7 et 8	Entre 8 et 9	Entre 8 et 9	Non	2		Non	1		Non	1		Non	1		Non	1
367	1	174		73	18- 29	1	1	2	3	4	0		2	22:00:00	No	yes	yes	yes	Continuous Positive Airway Pressure (CPAP)		367				0	2	4	0	0			367	Entre 7 et 8	Entre 8 et 9	Entre 8 et 9	Non	3		Non	3		Non	3		Non	3		Non	3
368	1	189		78	18- 29	1	1	2	3	5	1		4	22:00:00	No	No	No	No			368				0	0	0	0	<1			368	Entre 8 et 9	Entre 8 et 9	Entre 8 et 9	Non	2		Non	1		Non	1		Non	1		Non	1
369	1	189		77	40-49	3	1	6	3	6	1		1	21:00:00	No	No	No	No			369				0	0	0	0	0			369	Entre 7 et 8	Entre 7 et 8	Entre 7 et 8	Non	2		Oui		60	Oui		20	Oui		60	Oui
370	1	170		70	30-39	2	1	5, 4, 3	2	3	2		4	23:00:00	No	No	No	No			370				0	3	0	0	1			370	Entre 5 et 6	Entre 7 et 8	Entre 7 et 8	Non	2		Non	1		Non	1		Non	1		Non	1
371	1	185		74	30-39	2	1	4, 3	3	4	1		2	23:00:00	No	No	No	No			371				0	1	3	0	0			371	Entre 7 et 8	Entre 8 et 9	Entre 8 et 9	Non	2		Oui		20	Non	1		Oui		20	Non	1
372	1	187		83.3	40-49	3	1	4, 3, 2	2	3	1		1	22:00:00	No	No	No	No			372				0	0	5	0	0			372	Entre 8 et 9	Entre 8 et 9	Entre 8 et 9	Oui		20	Oui		60	Non	3		Oui		60	Non	3
373	1	170		57	40-49	3	1	6, 5, 3	2	3	1		2	23:00:00	No	No	No	No			373	radio ou lecture	1		0	0	2	0	2			373	Entre 7 et 8	Entre 8 et 9	Entre 8 et 9	Non	1		Oui		20	Non	1		Oui		50	Non	1
374	1	182		79	30-39	2	1	0	6	6	1		3	23:00:00	No	No	No	No			374				0	12	0	0	0			374	Entre 6 et 7	Entre 6 et 7	Entre 6 et 7	Non	3		Non	3		Non	3		Non	3		Non	3
375	1	181		73	40-49	3	3	0	3	4	1		2	22:00:00	No	No	No	No			375				0	1	1	0	0			375	Entre 5 et 6	Entre 8 et 9	Entre 8 et 9	Non	3		Non	enfants à s'occuper		Non	3		Non	enfants		Non	3
376	1	176		62	50- 59	4	1	5, 3	4	5	2		2	22:00:00	No	No	No	No			376				0	3	4	4	0			376	Entre 5 et 6	Entre 5 et 6	Entre 5 et 6	Non	2		Non	1		Non	1		Non			Non	1
377	2	172		65	18- 29	1	1	3, 2	2	4	0		1	22:00:00	yes	yes	yes	No			377				0	2	0	0	0			377	Entre 7 et 8	Entre 7 et 8	Entre 7 et 8	Non	2		Non	1		Non	1		Non	1		Non	3
378	1	172		64	40-49	3	2	5, 4, 3, 2, 0	3	3	4		2	23:00:00	No	No	No	No			378				0	0	1	0	0			378	Entre 7 et 8	Entre 8 et 9	Entre 8 et 9	Non	2		Non	1		Non	1		Non	1		Non	1
379	1	174		66	40-49	3	2	0	4	6	3		4	00:00:00	No	No	No	No			379				0	0	0	0	0			379	Entre 6 et 7	Entre 5 et 6	Entre 7 et 8	non	2		Non	1		Non	1		Non	1		Non	3
380	1	180		74	40-49	3	1	5, 3, 0	2	5	2		1	22:00:00	No	No	No	No			380				0	1	1	0	0			380	Entre 8 et 9	Entre 8 et 9	Entre 8 et 9	Oui		15	Non	1		Oui		15	Non	1		Oui
381	1	170		72	40-49	3	1	6, 5, 2	3	4	1		3	23:00:00	yes	No	No	No			381				0	5	0	0	1			381	Entre 6 et 7	Entre 7 et 8	Entre 8 et 9	Oui		10	Non	1		Oui		10	Non	1		Oui
382	2	173		68	30-39	2	1	0	3	5	1		1	21:00:00	No	No	No	No			382				0	0	2	0	0			382	Entre 8 et 9	Entre 8 et 9	Entre 8 et 9	Oui		15	Non	1		Oui		15	Oui		15	Oui
383	1	177		70	40-49	3	1	2	2	3	2		1	21:00:00	No	No	No	No			383	lecture avant de m endormir j adore ça !	1		0	2	2	0	0			383	Entre 9 et 10	>10	>10	Non	1		Oui		30	Non	1		Oui		60	Non
384	1	173		69	40-49	3	3	0	2	2	2		3	23:00:00	No	No	No	No			384				0	2	1	0	0			384	Entre 6 et 7	Entre 8 et 9	Entre 7 et 8	Non	2		Non	1		Non	1		Non	1		Non	1
385	2	169		60	30-39	2	1	6, 5, 1	3	4	>5		2	23:00:00	No	No	No	No			385	lire	1		0	2	0	0	0			385	Entre 6 et 7	Entre 7 et 8	Entre 6 et 7	Non	3		Oui		60	Non	3		Oui		90	Non	3
386	1	174		67	40-49	3	3	5, 2	2	3	0		2	23:00:00	No	No	No	No			386				0	4	1	0	0			386	Entre 6 et 7	Entre 8 et 9	Entre 9 et 10	Non	3		Non	1		Non	3		Oui		30	Non	3
387	1	189		90	40-49	3	1	5, 4, 1	2	3	4		2	22:00:00	No	No	No	No			387				0	2	0	1	<1			387	Entre 6 et 7	Entre 7 et 8	Entre 7 et 8	Non	3		Non	3		Non	1		Non	1		Non	1
388	1	175		72	40-49	3	1	4	2	3	1		2	22:00:00	No	No	No	No			388				0	2	1	0	1			388	Entre 6 et 7	Entre 7 et 8	Entre 8 et 9	Non	3		Oui		60	Non	3		Oui		60	Non	3
389	1	168		60	30-39	2	1	4, 2, 1	3	4	3		3	23:00:00	No	No	No	No			389				0	6	1	0	2			389	Entre 6 et 7	Entre 7 et 8	Entre 7 et 8	Non	2		Non	1		Non	1		Non	1		Oui
390	1	172		65.5	> 60	> 60	2	0	2	3	1		3	23:00:00	No	No	No	No			390	Je n'ai vraiment pas besoin d'une quelconque méthode pour dormir	5		0	4	<1	<1	0			390	Entre 7 et 8	Entre 8 et 9	Entre 8 et 9	Non	2		Non	1		Non	1		Non	1		Non	1
391	1	183		71	50- 59	4	1	5, 4, 2	3	4	2		3	23:00:00	No	yes	yes	No			391				0	5	0	0	1			391	Entre 6 et 7	Entre 7 et 8	Entre 7 et 8	Non	3		Oui		45	Non	3		Oui		50	Non	3
392	1	169		70	18- 29	1	1	4, 2, 1	2	2	0		1	na	No	No	No	No			392	diminution de la fréquence respiratoire ou sinon je fermes les yeux.	3		1	1	1	0	1			392	Entre 7 et 8	Entre 8 et 9	Entre 8 et 9	Non	1		Oui		60	Non	1		Oui		60	Non	1
393	1	178		79	40-49	3	1	5, 2, 1, 0	2	5	2		2	22:00:00	yes	No	No	No			393				0	12	0	0	2			393	Entre 6 et 7	>10	Entre 7 et 8	Non	1		Oui		60	Non	1		Oui		60	Non	1
394	1	178		73	50- 59	4	1	6, 3	2	3	1		1	na	No	No	yes	No			394				0	0	0	0	0			394	Tra le 5 e le 6 ore	Tra le 5 e le 6 ore	Tra le 7 e le 8 ore	No	3		No	2		No	2		No	2		No	2
395	1	188		79	40-49	3	1	3, 2	4	2	1		2	23:00:00	yes	No	No	No			395				0	1	1	<1	2			395	Tra le 7 e le 8 ore	Tra le 7 e le 8 ore	Tra le 7 e le 8 ore	No	2		Si		45	No	1		No	1		No	1
396	1	172		62	40-49	3	1	4	3	4	1		1	22:00:00	No	No	No	No			396				0	2	1	0	1			396	Tra le 7 e le 8 ore	Tra le 7 e le 8 ore	Tra le 6 e le 7 ore	No	2		No	1		No	1		No	1		No	2
397	2	173		72	40-49	3	1	2, 1	5	6	>5		2	na	No	No	No	No			397				0	2	1	0	1			397	Tra le 5 e le 6 ore	Tra le 5 e le 6 ore	Tra le 6 e le 7 ore	No	1		Si		60	No	2		No	1		No	2
398	2	170		62	30-39	2	1	0	6	6	>5		2	23:00:00	No	No	No	No			398				0	10	0	0	0			398	Meno di 5 ore	Meno di 5 ore	Meno di 5 ore	Si		15	Si		15	No	2		Si			No	2
399	1	185		85	50- 59	4	1	5, 3	3	4	>5		2	22:00:00	No	No	No	No			399				0	0	1	0	0			399	Tra le 7 e le 8 ore	Tra le 8 e le 9 ore	Tra le 8 e le 9 ore	No	2		No	1		No	1		No	1		No	1
400	1	168		60	30-39	2	1	1	4	5	3		2	21:00:00	No	No	No	No			400				0	0	2	0	0			400	Tra le 7 e le 8 ore	Tra le 8 e le 9 ore	Tra le 8 e le 9 ore	Si		60	No	1		Si		30	No	1		Si
401	1	165		59	18- 29	1	3	5, 4, 2	6	6	>5		1	na	yes	No	No	No			401				0	3	1	0	0			401	Tra le 6 e le 7 ore	Tra le 6 e le 7 ore	Tra le 6 e le 7 ore	No	2		No	1		No	1		No	1		No	1
402	1	172		63	18- 29	1	2	5, 3	5	6	3		2	22:00:00	No	No	No	No			402				0	0	0	0	0			402	Tra le 8 e le 9 ore	Tra le 8 e le 9 ore	Tra le 8 e le 9 ore	No	2		No	1		No	1		No	1		No	1
403	2	160		55	30-39	2	1	4	3	5	3		1	na	No	No	No	No			403				0	1	1	0	0			403	Tra le 6 e le 7 ore	Tra le 6 e le 7 ore	Tra le 7 e le 8 ore	No	3		Si		25	No	2		No	2		No	2
404	1	178		78	30-39	2	1	4, 0	2	3	>5		4	23:00:00	No	No	No	No			404				0	2	0	0	1			404	Tra le 6 e le 7 ore	Tra le 7 e le 8 ore	Tra le 8 e le 9 ore	Si		60	Si			No	3		Si		60	No	2
405	1	170		67	40-49	3	1	2	2	4	3		2	23:00:00	yes	No	No	No			405				0	3	0	0	0			405	Tra le 7 e le 8 ore	Tra le 8 e le 9 ore	Tra le 8 e le 9 ore	No	3		No	1		No	2		No	1		No	2
406	1	165		56	40-49	3	1	6	2	3	1		1	22:00:00	yes	No	No	No			406				0	0	0	0	0			406	Tra le 7 e le 8 ore	Tra le 7 e le 8 ore	Tra le 7 e le 8 ore	No	1		No	1		No	2		No	1		No	2
407	1	172		60	18- 29	1	1	5, 2, 0	4	5	2		2	23:00:00	yes	No	No	No			407				0	1	2	0	0			407	Tra le 8 e le 9 ore	Tra le 8 e le 9 ore	Tra le 8 e le 9 ore	No	2		No	1		No	2		Si		35	No	2
408	1	170		65	40-49	3	1	0	2	3	0		2	23:00:00	yes	No	No	No			408				0	5	0	0	0			408	Tra le 5 e le 6 ore	Tra le 5 e le 6 ore	Tra le 5 e le 6 ore	No	3		No			No			No			No
409	1	180		74	40-49	3	2	5, 2	4	5	1		2	23:00:00	No	No	No	No			409				0	2	1	0	0			409	Tra le 6 e le 7 ore	Tra le 6 e le 7 ore	Tra le 6 e le 7 ore	No	2		No	1		Si		60	No	1		Si
410	1	180		72	50- 59	4	2	5, 3, 2	3	4	2		1	22:00:00	No	No	No	No			410	Leggo un libro	1		0	4	1	0	2			410	Tra le 5 e le 6 ore	Tra le 6 e le 7 ore	Tra le 6 e le 7 ore	No	3		Si		60	No			Si		60	No
411	1	176		70	30-39	2	2	3	1	3	>5		4	22:00:00	No	No	No	No			411				0	2	0	0	0			411	Tra le 8 e le 9 ore	Tra le 8 e le 9 ore	Tra le 8 e le 9 ore	Si		60	Si		60	Si		60	Si		60	Si
412	1	175		69	30-39	2	3	0	4	5	2		1	20:00:00	No	No	No	No			412				0	2	1	0	0			412	Più di 10 ore	Più di 10 ore	Tra le 5 e le 6 ore	No	1		Si		120	Si		120	Si		120	No	2
413	1	184		78	30-39	2	1	4, 1	4	5	>5		2	23:00:00	No	No	yes	No			413				0	2	1	0	0			413	Tra le 6 e le 7 ore	Tra le 5 e le 6 ore	Tra le 7 e le 8 ore	No	1		No	2		No	2		No	2		No	2
414	1	177		74	30-39	2	1	4, 1	2	3	2		2	>00:00	No	No	No	No			414				0	5	1	1	2			414	Tra le 6 e le 7 ore	Tra le 6 e le 7 ore	Tra le 7 e le 8 ore	No	2		No	1		No	1		No	1		No	1
415	1	184		75	30-39	2	1	5, 1, 0	6	6	1		1	na	No	No	No	No			415				0	0	1	0	0			415	Tra le 7 e le 8 ore	Tra le 6 e le 7 ore	Tra le 8 e le 9 ore	No	3		No	1		No	2		Si		60	No	2
416	1	182		74	40-49	3	1	0	2	3	1		1	22:00:00	No	No	yes	No			416	leggo	1		0	3	0	0	0			416	Tra le 6 e le 7 ore	Tra le 6 e le 7 ore	Tra le 7 e le 8 ore	No	2		No	1		No	1		No	1		No	1
417	1	180		72	30-39	2	1	2	3	4	0		3	23:00:00	No	No	No	No			417				0	2	0	0	2			417	Tra le 6 e le 7 ore	Tra le 6 e le 7 ore	Tra le 7 e le 8 ore	No	2		No	1		No	1		No	1		No	1
418	1	170		74	40-49	3	1	0	4	5	4		2	23:00:00	No	No	No	No			418				0	2	3	0	1			418	Tra le 6 e le 7 ore	Tra le 7 e le 8 ore	Tra le 8 e le 9 ore	No	1		No	1		No	2		No	1		No	2
419	1	181		66	30-39	2	1	6	3	5	2		3	>00:00	No	No	No	No			419				0	0	0	0	0			419	Tra le 5 e le 6 ore	Tra le 6 e le 7 ore	Tra le 7 e le 8 ore	No	3		No	1		No	2		Si		30	No	2
420	1	170		68	50- 59	4	1	5, 4	2	3	2		2	23:00:00	No	No	No	No			420				0	3	0	0	1			420	Tra le 6 e le 7 ore	Tra le 6 e le 7 ore	Tra le 6 e le 7 ore	No	2		No	1		No	1		No	1		No	1
421	1	173		62	30-39	2	1	2	5	5	3		4	>00:00	yes	No	No	No			421				0	0	0	5	0			421	Tra le 5 e le 6 ore	Tra le 6 e le 7 ore	Tra le 6 e le 7 ore	No	2		No	1		No	1		No	1		No	1
422	2	165		55	30-39	2	3	5, 4, 3	4	5	4		1	22:00:00	No	No	yes	No			422				0	3	0	0	2			422	Tra le 7 e le 8 ore	Tra le 7 e le 8 ore	Tra le 9 e le 10 ore	No	1		Si		60	No	2		Si		60	No	2
423	1	177		73	50- 59	4	1	0	3	4	0		1	20:00:00	No	No	No	No			423				0	1	0	0	1			423	Tra le 5 e le 6 ore	Tra le 6 e le 7 ore	Tra le 6 e le 7 ore	No	2		No	1		No	1		No	1		No	1
424	1	176		73	40-49	3	1	5, 2	2	3	2		2	22:00:00	No	No	No	No			424				0	<1	1	0	1			424	Tra le 6 e le 7 ore	Tra le 6 e le 7 ore	Tra le 6 e le 7 ore	Si		30	Si		30	Si		30	Si		30	Si
425	1	175		74	50- 59	4	1	6, 2	3	3	2		2	23:00:00	yes	No	No	No			425				0	3	0	1	0			425	Tra le 7 e le 8 ore	Tra le 6 e le 7 ore	Tra le 7 e le 8 ore	No	2		No	1		No	1		Si			no	1
426	1	167		72	30-39	2	1	1	3	4	0			>00:00	yes	No	No	No			426				0	2	0	0	0			426	Tra le 7 e le 8 ore	Tra le 6 e le 7 ore	Tra le 8 e le 9 ore	No	2		Si		120	No	1		Si		120	Si
427	1	175		63	40-49	3	1	6, 5	4	5	3		3	22:00:00	No	No	No	No			427				4	5	0	0	1			427	Tra le 6 e le 7 ore	Tra le 6 e le 7 ore	Tra le 7 e le 8 ore	Si		60	Si			Si		60	Si			Si
428	1	175		67	40-49	3	1	6, 1	2	4	2		1	00:00:00	No	No	No	No			428				0	2	0	0	2			428	Tra le 6 e le 7 ore	Tra le 7 e le 8 ore	Tra le 7 e le 8 ore	No	2		No	1		No	1		No	1		No	1
429	1	195		88	30-39	2	1	4	3	2	2		2	23:00:00	yes	No	No	No			429				0	2	5	0	2			429	Tra le 8 e le 9 ore	Tra le 8 e le 9 ore	Tra le 7 e le 8 ore	Si		20	Si		20	Si		20	Si		20	Si
430	1	172		63	18- 29	1	2	5	4	5	0		1	20:00:00	No	No	No	No			430	Nulla	5		10	2	0	0	1			430	Tra le 8 e le 9 ore	Tra le 8 e le 9 ore	Tra le 8 e le 9 ore	Si		30	Si		30	Si		30	Si		30	Si
431	1	167		70	> 60	> 60	1	5, 0	3	1	4		3	23:00:00	No	No	yes	yes	homeopathy		431				0	2	0	0	0			431	Tra le 6 e le 7 ore	Tra le 6 e le 7 ore	Tra le 6 e le 7 ore	Si		10	Si		10	Si		10	Si			Si
432	1	185		84	40-49	3	1	5, 3, 1	3	6	2		1	23:00:00	yes	No	No	No			432	nulla	5		0	3	1	1	2			432	Meno di 5 ore	Meno di 5 ore	Tra le 6 e le 7 ore	No	2		No	1		Si		120	Si		120	Si
433	1	178		74	50- 59	4	3	5, 0	2	6	3		2	00:00:00	No	No	No	No			433				0	5	2	3	0			433	Tra le 6 e le 7 ore	Tra le 6 e le 7 ore	Tra le 6 e le 7 ore	si		120	No			Si		120	No	1		Si
434	1	177		70	> 60	> 60	2	5, 0	2	3	3		3	23:00:00	No	No	No	No			434				0	2	1	0	0			434	Tra le 5 e le 6 ore	Tra le 6 e le 7 ore	Tra le 6 e le 7 ore	Si		90	Si		30	Si		30	Si		30	Si
435	1	177		80	50- 59	4	1	6, 4, 1	2	3	2		1	23:00:00	No	No	No	No			435				0	1	0	0	0			435	Tra le 6 e le 7 ore	Tra le 6 e le 7 ore	Tra le 6 e le 7 ore	No	2		No	1		No	1		No	1		No	1
436	1	183		78	50- 59	4	1	4, 3	2	3	2		1	21:00:00	No	No	No	No			436	nessuno	5		0	4	0	0	<1			436	Tra le 6 e le 7 ore	Tra le 6 e le 7 ore	Tra le 7 e le 8 ore	rarement		15	No	2		No	2		No	2		Si
437	2	165		56	40-49	3	1	5, 3	2	2	0		2	22:00:00	No	No	No	No			437				0	3	<1	0	0			437	Tra le 5 e le 6 ore	Tra le 6 e le 7 ore	Tra le 6 e le 7 ore	No	3		No	2		No	2		No	2		No	2
438	1	176		71	40-49	3	1	3, 2	2	3	1		3	22:00:00	yes	No	No	No			438				0	1	1	1	1			438	Tra le 8 e le 9 ore	Tra le 8 e le 9 ore	Tra le 7 e le 8 ore	No	3		Si		15	No	2		No			No	2
439	1	165		59	30-39	2	1	4	3	4	2		2	22:00:00	No	No	No	No			439				0	4	0	0	0			439	Tra le 6 e le 7 ore	Tra le 6 e le 7 ore	Tra le 7 e le 8 ore	No	2		No	1		No	1		No	1		No
440	1	176		70	50- 59	4	3	5, 3, 0	3	4	1		4	22:00:00	No	No	No	No			440				0	1	2	0	2			440	Tra le 6 e le 7 ore	Tra le 6 e le 7 ore	Tra le 7 e le 8 ore	No	2		No	1		No	2		No			No	2
441	1	180		78	50- 59	4	1	2	5	5	0		2	23:00:00	No	No	yes	No			441				0	3	2	0	0			441	Tra le 5 e le 6 ore	Tra le 5 e le 6 ore	Tra le 5 e le 6 ore	No	2		No	1		No	1		No	1		No	1
442	1	178		58	18- 29	1	1	2	3	3	3		2	22:00:00	yes	No	No	No			442				0	1	0	0	0			442	Tra le 8 e le 9 ore	Tra le 7 e le 8 ore	Tra le 7 e le 8 ore	No	2		No	1		No	1		No	1		No	1
443	1	176		60	30-39	2	1	0	3	4	1		2	21:00:00	No	No	No	No			443				0	3	0	0	0			443	Tra le 7 e le 8 ore	Tra le 7 e le 8 ore	Tra le 6 e le 7 ore	No	2		No	1		No	1		No	1		No	1
444	2	158		57	30-39	2	1	6, 1	2	3	1		2	23:00:00	yes	No	yes	No			444				0	2	0	0	0			444	Tra le 6 e le 7 ore	Tra le 7 e le 8 ore	Tra le 6 e le 7 ore	No	2		No	1		No	1		No	1		No	1
445	1	184		71	30-39	2	1	6, 2	2	3	2		1	22:00:00	No	No	No	No			445				0	2	0	0	0			445	Tra le 5 e le 6 ore	Tra le 7 e le 8 ore	Tra le 7 e le 8 ore	No	2		No	1		No	1		No	1		No	2
446	1	170		67	40-49	3	1	1	3	3	1		1	>00:00	No	No	No	No			446				0	4	2	0	0			446	Tra le 6 e le 7 ore	Tra le 7 e le 8 ore	Tra le 6 e le 7 ore	Si		40	Si		40	Si		40	Si		40	Si
447	1	180		97	30-39	2	1	6, 5	2	3	4		3	>00:00	No	No	yes	No			447				0	2	0	0	0			447	Tra le 6 e le 7 ore	Tra le 7 e le 8 ore	Tra le 7 e le 8 ore	No	2		No	1		No	1		No	1		No	1
448	1	174		73	30-39	2	1	6, 3, 1	2	2	2		2	23:00:00	yes	No	No	No			448				0	4	0	0	0			448	Tra le 6 e le 7 ore	Tra le 6 e le 7 ore	Tra le 7 e le 8 ore	No	2		No	1		No	1		No	1		No	1
449	1	178		69	30-39	2	1	5, 3	1	2	0		2	22:00:00	No	No	No	No			449				0	1	1	<1	<1			449	Tra le 7 e le 8 ore	Tra le 7 e le 8 ore	Tra le 8 e le 9 ore	No	2		No	1		No	2		No	1		No	2
450	1	174		63	30-39	2	1	6, 4, 1	2	2	2		3	23:00:00	yes	No	No	No			450	Nessuno... chiudo gli occhi e dormo!!	5		0	3	1	0	0			450	Tra le 6 e le 7 ore	Tra le 6 e le 7 ore	Tra le 8 e le 9 ore	No	2		No	1		No	1		No	1		No	1
451	1	172		62	40-49	3	1	0	3	3	0		2	23:00:00	yes	No	No	No			451				0	2	0	0	<1			451	Tra le 5 e le 6 ore	Tra le 6 e le 7 ore	Tra le 6 e le 7 ore	No	2		No	1		No	1		No	1		No	1
452	1	172		79	30-39	2	1	2	3	4	2		2	23:00:00	No	yes	No	No			452				0	2	0	2	0			452	Tra le 7 e le 8 ore	Tra le 7 e le 8 ore	Tra le 7 e le 8 ore	Si		30	Si		30	Si		30	Si		30	Si
453	1	180		75	18- 29	1	1	2, 1	3	4	0		2	23:00:00	No	No	No	No			453				0	0	0	0	0			453	Tra le 7 e le 8 ore	Tra le 8 e le 9 ore	Tra le 6 e le 7 ore	No	3		No	2		No	2		No	2		No	2
454	2	160		54	40-49	3	1	5	3	5	3		1	23:00:00	yes	No	No	No			454				0	4	1	0	0			454	Più di 10 ore	Tra le 9 e le 10 ore	Più di 10 ore	No	2		No	1		No	1		No	1		No	1
455	1	183		83	30-39	2	1	3	3	4	4		2	23:00:00	No	No	yes	No			455				0	4	0	0	2			455	Tra le 6 e le 7 ore	Tra le 7 e le 8 ore	Tra le 6 e le 7 ore	Si		15	No	1		Si		15	Si			Si
456	1	193		80	18- 29	1	1	2	3	5	1		2	22:00:00	No	No	No	No			456	vado a letto	5		0	0	0	0	0			456	Tra le 7 e le 8 ore	Tra le 8 e le 9 ore	Tra le 8 e le 9 ore	No	3		Si		60	No	2		Si		60	No	2
457	1	193		80	18- 29	1	1	2	3	5	1		2	22:00:00	No	No	No	No			457	vado a letto	5		0	0	0	0	0			457	Tra le 7 e le 8 ore	Tra le 8 e le 9 ore	Tra le 8 e le 9 ore	No	3		Si		60	No	2		Si		60	No	2
458	1	182		80	40-49	3	1	2	3	4	4		2	23:00:00	No	No	No	No			458				0	1	0	0	0			458	Tra le 6 e le 7 ore	Tra le 9 e le 10 ore	Tra le 7 e le 8 ore	No	3		No	2		No	2		No	2		No	2
459	1	180		86	30-39	2	1	2	3	3	1		2	22:00:00	yes	No	No	No			459				0	2	0	1	1			459	Tra le 6 e le 7 ore	Tra le 8 e le 9 ore	Tra le 8 e le 9 ore	No	3		No	1		No	2		No	1		No	2
460	1	171		59	30-39	2	1	3, 2	4	5	0		2	00:00:00	yes	No	No	No			460				0	3	0	0	1			460	Tra le 6 e le 7 ore	Tra le 6 e le 7 ore	Tra le 6 e le 7 ore	No	no sono capace		No	Non sono capace		No	Non sono capace		No	Non sono capace		No
461	1	184		89	40-49	3	1	6, 1, 0	1	6	1		2	>00:00	yes	No	yes	No			461				0	7	0	0	2			461	Tra le 5 e le 6 ore	Tra le 6 e le 7 ore	Tra le 7 e le 8 ore	No	2		No	1		No	1		No	1		No	1
462	1	178		80	40-49	3	1	5, 2, 0	2	3	1		2	22:00:00	yes	No	yes	No			462	lettura	1		0	4	0	0	3			462	Tra le 5 e le 6 ore	Tra le 5 e le 6 ore	Tra le 5 e le 6 ore	Si		40	Si		40	No	2		Si		40	No	2
463	1	190		89	40-49	3	1	6, 2	1	3	2		1	22:00:00	No	No	No	No			463	leggere	1		0	3	1	0	1			463	Tra le 7 e le 8 ore	Tra le 8 e le 9 ore	Tra le 7 e le 8 ore	No	2		No	1		No	1		Si		30	Si
464	1	170		65	30-39	2	1	2, 1	2	2	2		1	00:00:00	No	No	No	No			464				0	4	0	0	1			464	Tra le 5 e le 6 ore	Tra le 6 e le 7 ore	Tra le 6 e le 7 ore	No	3		Si		30	No	2		No	2		No	2
465	1	172		61	18- 29	1	1	5, 3	3	5	0		2	21:00:00	yes	No	yes	No			465				0	2	1	0	0			465	Tra le 7 e le 8 ore	Tra le 7 e le 8 ore	Tra le 7 e le 8 ore	No	2		No	1		No	2		Si		30	No	2
466	2	167		51	40-49	3	1	0	3	4	2		2	22:00:00	yes	yes	yes	No			466				0	2	0	1	0			466	Tra le 7 e le 8 ore	Tra le 7 e le 8 ore	Tra le 6 e le 7 ore	No	1		Si		120	No	2		No	1		No	2
467	2	167		51	40-49	3	1	0	3	4	2		2	22:00:00	yes	yes	yes	No			467				0	2	0	1	0			467	Tra le 7 e le 8 ore	Tra le 7 e le 8 ore	Tra le 6 e le 7 ore	No	1		Si		120	No	2		No	1		No	2
468	1	205		105	40-49	3	1	4	1	2	0		2	21:00:00	No	No	No	No			468	Meditazione vipassana!	3		0	2	0	0	2			468	Tra le 7 e le 8 ore	Tra le 7 e le 8 ore	Tra le 7 e le 8 ore	Si		60	Si		60	No	2		Si		60	Si
469	1	178		65	50- 59	4	1	4	3	4	4		1	21:00:00	yes	No	No	No			469	penso a cose positive	3		0	0	0	0	<1			469	Tra le 8 e le 9 ore	Tra le 8 e le 9 ore	Tra le 8 e le 9 ore	No			No			No	2		Si		90	No	2
470	1	173		70	40-49	3	1	4, 2	3	4	3		2	21:00:00	No	No	No	No			470				0	1	0	0	1			470	Tra le 7 e le 8 ore	Tra le 8 e le 9 ore	Tra le 8 e le 9 ore	No	3		Si		60	No	2		Si		60	No	2
471	1	180		78	30-39	2	1	4, 2	4	5	1		2	23:00:00	yes	No	yes	No			471				0	2	<1	0	0			471	Tra le 6 e le 7 ore	Tra le 6 e le 7 ore	Tra le 8 e le 9 ore	No	1		Si		60	No	2		Si		60	No	2
472	2	173		63	40-49	3	1	0	2	3	>5		2	na	No	No	yes	No			472				0	2	0	0	1			472	Tra le 5 e le 6 ore	Tra le 5 e le 6 ore	Tra le 6 e le 7 ore	No	2		No	1		No	1		No	1		No	1
473	1	175		59	40-49	3	1	4	1	3	0		3	23:00:00	No	No	yes	No			473				0	2	0	0	0			473	Tra le 6 e le 7 ore	Tra le 6 e le 7 ore	Tra le 7 e le 8 ore	Si		25	non	2		No	2		Si		30	Non	2
474	1	183		67	18- 29	1	1	2	3	5	0		1	22:00:00	No	No	No	No			474				0	0	0	0	0			474	Tra le 9 e le 10 ore	Tra le 9 e le 10 ore	Tra le 9 e le 10 ore	No	1		Si		60	No	2		Si		60	No	2
475	1	169		68	50- 59	4	1	3	3	4	0		2	22:00:00	No	No	No	No			475				1	1	0	0	2			475	Tra le 8 e le 9 ore	Tra le 8 e le 9 ore	Tra le 8 e le 9 ore	No	3		Si		60	No	2		No	1		No
476	1	175		74	30-39	2	1	1, 0	4	5	2		2	23:00:00	No	No	No	No			476	nulla	5		0	4	1	0	0			476	Tra le 6 e le 7 ore	Tra le 6 e le 7 ore	Tra le 8 e le 9 ore	No	1		No	2		No	2		No	2		No	2
477	1	180		76	50- 59	4	1	5, 2	2	3	1		2	23:00:00	No	No	No	No			477				0	0	1	0	1			477	Tra le 6 e le 7 ore	Tra le 7 e le 8 ore	Tra le 7 e le 8 ore	No	2		No	1		No	1		No	1		Si
478	1	174		75	40-49	3	1	5, 3, 1	2	3	1		2	00:00:00	No	No	No	No			478				0	3	0	0	3			478	Tra le 6 e le 7 ore	Tra le 7 e le 8 ore	Tra le 7 e le 8 ore	No	2		No	1		No	1		No	1		No	1
479	2	167		60	30-39	2	1	4, 1	3	5	4		1	na	No	No	No	No			479				0	3	4	1	0			479	Tra le 5 e le 6 ore	Tra le 6 e le 7 ore	Tra le 6 e le 7 ore	No	1		Si		20	No	2		No	2		No	2
480	1	178		75	40-49	3	1	3, 2	3	4	3		2	22:00:00	No	No	No	No			480	Leggo libri	1		0	0	1	0	0			480	Tra le 6 e le 7 ore	Tra le 6 e le 7 ore	Tra le 7 e le 8 ore	No	3		No	2		No	2		No	1		No	2
481	1	170		61	18- 29	1	1	5, 2, 1	4	5	0		1	22:00:00	No	No	No	No			481				0	0	1	0	0			481	Tra le 7 e le 8 ore	Tra le 9 e le 10 ore	Tra le 9 e le 10 ore	Si		30	Si		30	Si		30	Si		30	Si
482	2	165		51	40-49	3	1	5	5	5	3		3	na	No	yes	yes	yes	Hypnotic		482				2	0	1	0	0			482	Tra le 6 e le 7 ore	Tra le 6 e le 7 ore	Tra le 6 e le 7 ore	No	2		No	1		No	1		No	1		No	1
483	1	179		79	40-49	3	1	5, 3, 1	2	3	3		2	23:00:00	No	No	No	No			483				0	3	0	2	0			483	Tra le 6 e le 7 ore	Tra le 6 e le 7 ore	Tra le 6 e le 7 ore	No	2		No	1		No	1		No	1		No	1
484	1	175		75	18- 29	1	2	0	6	6	0		2	22:00:00	No	No	yes	No			484				0	0	0	0	0			484	Tra le 7 e le 8 ore	Tra le 7 e le 8 ore	Tra le 7 e le 8 ore	No	1		Si		20	No	2		No	1		Si
485	2	167		50	40-49	3	1	4, 2	1	3	0		1	23:00:00	No	No	No	No			485				0	3	0	0	0			485	Tra le 6 e le 7 ore	Tra le 6 e le 7 ore	Tra le 6 e le 7 ore	No	2		No	1		No	1		No	1		No	1
486	1	173		60	18- 29	1	1	1, 0	2	4	1		2	23:00:00	No	No	No	No			486				0	0	0	0	0			486	Tra le 6 e le 7 ore	Tra le 5 e le 6 ore	Tra le 8 e le 9 ore	No	2		No	1		No	1		No	2		No	1
487	1	178		76	40-49	3	1	6	3	3	2		2	23:00:00	yes	No	No	No			487				0	5	0	0	1			487	Tra le 5 e le 6 ore	Tra le 6 e le 7 ore	Tra le 6 e le 7 ore	No	2		No	1		No	1		No	1		No	1
488	1	181		72	18- 29	1	1	2	1	1	2		2	22:00:00	yes	No	No	No			488				0	2	0	0	0			488	Tra le 7 e le 8 ore	Tra le 7 e le 8 ore	Tra le 7 e le 8 ore	Si		30	Si		60	Si		30	Si		60	Si
489	1	173		71	50- 59	4	1	3, 2	2	3	2		2	22:00:00	No	No	No	No			489				0	3	0	0	1			489	Tra le 6 e le 7 ore	Tra le 7 e le 8 ore	Tra le 7 e le 8 ore	No	2		No	1		No	1		No	1		No	1
490	1	185		80	30-39	2	1	5, 3, 1	5	6	>5		2	21:00:00	No	No	No	No			490				0	4	1	3	0			490	Tra le 5 e le 6 ore	Tra le 5 e le 6 ore	Tra le 5 e le 6 ore	No	2		No	1		No	1		No	1		No	1
491	1	175		68	40-49	3	1	6, 2	3	3	2		2	21:00:00	No	No	No	No			491				0	2	0	0	1			491	Tra le 7 e le 8 ore	Tra le 7 e le 8 ore	Tra le 7 e le 8 ore	No	2		No	1		No	1		No	1		No	1
492	1	175		82	50- 59	4	1	2	2	2	2		2	23:00:00	yes	No	yes	No			492				0	3	1	1	0			492	Meno di 5 ore	Tra le 5 e le 6 ore	Tra le 6 e le 7 ore	No	1		Si		15	No	1		No	1		No	1
493	1	175		63	50- 59	4	1	0	3	4	2		2	21:00:00	No	No	No	No			493				0	2	1	0	2			493	Tra le 8 e le 9 ore	Tra le 8 e le 9 ore	Tra le 8 e le 9 ore	No	2		No	1		No	1		No	1		No	1
494	1	187		75	40-49	3	2	0	3	4	1		4	na	No	No	No	No			494				0	1	0	1	0			494	Tra le 7 e le 8 ore	Tra le 7 e le 8 ore	Tra le 7 e le 8 ore	No	2		No	1		No	1		No	1		No	1
495	1	165		62	50- 59	4	1	0	4	4	4		2	na	No	No	yes	No			495	musica lettura	2		0	6	3	0	1			495	Tra le 6 e le 7 ore	Tra le 7 e le 8 ore	Tra le 8 e le 9 ore	Si		120	Si		60	Si		60	Si		120	Si
496	1	186		74	30-39	2	1	2	2	3	2		1	20:00:00	No	No	No	No			496				0	3	2	0	1			496	Tra le 7 e le 8 ore	Tra le 8 e le 9 ore	Tra le 8 e le 9 ore	No	2		No	1		No	1		No	1		No	1
497	1	183		74	30-39	2	1	4, 0	2	3	2		2	00:00:00	No	No	No	No			497				0	4	0	0	1			497	Tra le 6 e le 7 ore	Tra le 7 e le 8 ore	Tra le 7 e le 8 ore	No	1		Si		30	No	2		Si		30	No	2
498	1	177		63	30-39	2	1	5, 4, 1	2	3	0		3	22:00:00	No	No	No	No			498				0	1	1	0	1			498	Tra le 7 e le 8 ore	Tra le 8 e le 9 ore	Tra le 8 e le 9 ore	No	1		Si		60	No	2		Si		60	No	2
499	2	155		60	30-39	2	1	2	3	6	3		3	23:00:00	yes	No	No	No			499				5	2	0	0	3			499	Tra le 7 e le 8 ore	Tra le 9 e le 10 ore	Tra le 9 e le 10 ore	No	3		Si		120	No	2		Si		120	No	2
500	1	188		78	30-39	2	1	0	2	2	4		1	23:00:00	No	No	No	No			500				0	3	0	0	2			500	Tra le 7 e le 8 ore	Tra le 8 e le 9 ore	Tra le 8 e le 9 ore	No	3		No	2		No	2		No	2		No	2
501	1	168		56	50- 59	4	1	5, 2	3	4	3		3	00:00:00	No	No	No	No			501				15	4	1	0	2			501	Tra le 5 e le 6 ore	Tra le 5 e le 6 ore	Tra le 7 e le 8 ore	No	2		No	1		No	1		No	1		No	1
502	1	174		72	40-49	3	1	5, 4	3	4	2		2	23:00:00	No	No	yes	yes	Phytotherapy		502				0	0	0	0	0			502	Tra le 5 e le 6 ore	Tra le 5 e le 6 ore	Tra le 6 e le 7 ore	No	1		Si		60	No	1		No	1		No	1
503	2	172		61	30-39	2	1	6, 2, 0	3	4	1		1	22:00:00	No	No	No	No			503				0	1	1	0	0			503	Tra le 5 e le 6 ore	Tra le 7 e le 8 ore	Tra le 8 e le 9 ore	No	1		No	1		No	2		No	1		No	1
504	1	192		75	40-49	3	1	0	3	5	2		2	23:00:00	No	No	No	No			504				18	4	1	0	5			504	Tra le 6 e le 7 ore	Tra le 7 e le 8 ore	Tra le 7 e le 8 ore	No	1		No	2		No	2		No	2		No	2
505	1	168		60	40-49	3	1	2	3	4	2		2	23:00:00	No	No	No	No			505				0	2	0	0	0			505	Tra le 7 e le 8 ore	Tra le 6 e le 7 ore	Tra le 6 e le 7 ore	No	2		No	1		No	1		No	1		No	1
506	1	180		74	40-49	3	1	2	2	3	3		2	22:00:00	yes	No	No	No			506				0	1	0	0	1			506	Tra le 7 e le 8 ore	Tra le 7 e le 8 ore	Tra le 7 e le 8 ore	No	1		No	1		No	2		Si		60	No	2
507	2	165		55	30-39	2	1	6, 1	4	4	4		1	21:00:00	No	No	No	No			507				0	3	4	1	1			507	Tra le 6 e le 7 ore	Tra le 5 e le 6 ore	Tra le 6 e le 7 ore	No	se dormo di giorno mi sento peggio		No	se dormo di giorno mi sento peggio		No	se dormo di giorno mi sento peggio		No	se dormo di giorno mi sento peggio		No	se dormo di giorno mi sento peggio
508	1	186		80	30-39	2	1	2	3	4	3		1	20:00:00	No	No	No	No			508				0	2	0	0	0			508	Tra le 6 e le 7 ore	Tra le 5 e le 6 ore	Tra le 5 e le 6 ore	No	2		No	1		No	1		No	1		No	1
509	1	178		62	50- 59	4	3	5, 2	3	3	1		2	21:00:00	No	No	yes	No			509				6	2	0	0	0			509	Tra le 7 e le 8 ore	Tra le 7 e le 8 ore	Tra le 7 e le 8 ore	No	1		Si			Si			No	2		No	2
510	1	174		73	50- 59	4	3	5	4	5	3		3	22:00:00	No	No	No	No			510				0	1	0	0	1			510	Tra le 8 e le 9 ore	Più di 10 ore	Tra le 8 e le 9 ore	No	2		Si		60	Si		60	Si		60	Si
511	1	181		84	30-39	2	1	4, 2	2	4	3		2	>00:00	No	No	yes	No			511				0	3	1	0	4			511	Tra le 5 e le 6 ore	Tra le 6 e le 7 ore	Tra le 7 e le 8 ore	No			Si		60	No			Si		60	No
512	1	180.34		69.3855	50- 59	4	1	5, 4, 3	3	5	1		1	22:00:00	Yes	No	No	No			512				0	1	0	0	1			512	Between 7 and 8	Between 7 and 8	Between 7 and 8	No	3		No	3		No	3		No	3		No	3
513	1	176		66	30-39	2	1	5, 3	6	6	3		3	21:00:00	Yes	Yes	Yes	No			513				0	4	0	1	0			513	Between 8 and 9	Between 8 and 9	Between 7 and 8	No	2		Yes		30	No	3		Yes		30	No	3
514	2	161		47	50- 59	4	2	5	4	6	0		2	21:00:00	No	No	No	No			514				0	3	2	0	1			514	Between 7 and 8	Between 7 and 8	Between 7 and 8	No	2		No	1		No	1		No	1		No
515	1	184		80	40-49	3	1	3, 2	2	4	2		3	22:00:00	No	No	No	No			515				0	4	0	0	<1			515	Between 8 and 9	Between 8 and 9	Between 8 and 9	No	3		Yes		30	No	3		Yes		30	No	3
516	1	177.8		77.095	30-39	2	1	0	4	6	3		1	21:00:00	Yes	No	No	No			516	Think about distractions from life (movies, tv shows, etc)	5		0	4	0	0	0			516	Between 5 and 6	Between 7 and 8	Between 7 and 8	No	1		Yes		30	No	1		Yes		60	No	1
517	1	185		78	40-49	3	3	5	3	5	4		3	21:00:00	No	No	No	No			517				0	6	2	0	<1			517	Between 7 and 8	Between 7 and 8	Between 7 and 8	No	2		No	1		No			No	1		Yes
518	2	167		65	30-39	2	1	6	5	6	2		4	00:00:00	Yes	No	No	No			518				0	4	2	0	0			518	Between 6 and 7	Between 7 and 8	Between 6 and 7	No	2		No	1		No	1		No	1		No	1
519	1	180		77	50- 59	4	1	0	4	5	4		4	22:00:00	No	No	No	No			519				0	>10	0	0	<1			519	Between 7 and 8	Between 8 and 9	Between 8 and 9	No	2		No	1		No	1		no	1		No
520	1	180		70	30-39	2	1	5, 2	5	6	3		2	00:00:00	No	No	Yes	No			520	reading	1		0	5	<1	1	0			520	Between 8 and 9	Between 8 and 9	Between 8 and 9	No	2		No	1		No	1		No	1		Yes
521	1	188		82	40-49	3	1	2	3	5	2		2	22:00:00	No	No	No	No			521				0	4	8	1	1			521	Between 7 and 8	Between 8 and 9	Between 8 and 9	No	2		No	1		No	1		No	1		No	1
522	1	180.34		70.2925	50- 59	4	3	0	5	6	>5		3	00:00:00	No	No	No	yes	Benzodiazepine		522				0	2	0	0	0			522	Between 7 and 8	Between 7 and 8	Between 7 and 8	No	1		Yes		12	No	1		Yes		12	No	1
523	1	193.04		90.7	50- 59	4	1	0	3	6	1		1	22:00:00	No	No	Yes	No			523				0	4	0	0	1			523	Between 5 and 6	Between 6 and 7	Between 6 and 7	Yes		15	Yes		15	Yes		15	Yes		15	Yes
524	1	175.26		72.56	50- 59	4	1	6, 2	3	4	1		4	21:00:00	Yes	No	Yes	No			524				0	2	0	1	0			524	Between 7 and 8	Between 7 and 8	Between 8 and 9	No	2		Yes		20	No	1		Yes		20	No	3
525	1	170.2		75.281	30-39	2	1	3	4	4	4		1	20:00:00	No	No	No	No			525				0	3	0	1	0			525	Between 5 and 6	Between 5 and 6	Between 5 and 6	No	2		No	1		No	1		No	1		No	1
526	1	183		68	40-49	3	3	5	3	4	2		2	>00:00	Yes	No	No	No			526				0	4	6	0	1			526	Between 6 and 7	Between 8 and 9	Between 7 and 8	Yes		30	Yes		30	Yes		30	Yes		60	Yes
527	1	180.34		77.5485	30-39	2	1	6, 5, 3	3	4	2		3	22:00:00	Yes	Yes	Yes	No			527	Read a book	1		0	2	0	0	1			527	Between 7 and 8	Between 8 and 9	Between 8 and 9	No	1		No			No	1		No			No	1
528	1	167.64		69.839	50- 59	4	1	0	6	6	4		4	22:00:00	Yes	No	No	No			528	Reading	1		0	6	0	0	0			528	Between 8 and 9	Between 8 and 9	Between 8 and 9	Yes		30	Yes		60	Yes		30	Yes		60	Yes
529	1	153.67		83.8975	50- 59	4	1	2	3	4	1		3	22:00:00	No	No	Yes	No			529				0	3	0	0	0			529	Between 7 and 8	Between 7 and 8	Between 7 and 8	No	2		No	1		No	1		No	1		No	1
530	1	187.96		95.235	30-39	2	1	0	4	6	3		1	21:00:00	No	No	Yes	No			530	Reading, Gentle Yoga	1.3		0	2	0	<1	<1			530	Between 8 and 9	Between 8 and 9	Between 8 and 9	No	2		Yes		120	No	3		Yes		120	No	3
531	1	165.1		70.2925	> 60	> 60	2	5	3	3	>5		4	21:00:00	No	No	Yes	No			531				0	1	0	1	<1			531	Between 5 and 6	Between 5 and 6	Between 5 and 6	No	don't think of it		No	don't think of it		No	don't think of it		No	don't think of it		No	don't think of it
[truncated: 105 more rows]
[truncated: 28 more columns]

## Sheet: strategies
subject#	Have you performed an overnight ultra-trail?	time ? 1=<5: 2=5-20mn; 3=>20mn	total sleep duration ? 1= <15mn; 2= 15-30mn; 3= 30 à 1h; 4=1 à 2h; 5= >2h	race time ? <30h =1; 30-40h = 2; 40-50h=3; 50-60h=4; 60-70=5; >70h=6	nap location 1=ravitaillement 2=dehors	clock yes no		subject#	Have you performed an ultra-trail comprising 2 nights of racing?	time ? 1=<5: 2=5-20mn; 3=>20mn	total sleep duration ? 1= <15mn; 2= 15-30mn; 3= 30 à 1h; 4=1 à 2h; 5= >2h	race time ? <30h =1; 30-40h = 2; 40-50h=3; 50-60h=4; 60-70=5; >70h=6; ab=abandon	nap location 1=ravitaillement 2=dehors	clock yes no		subject#	Have you performed an ultra-trail comprising more than 2 nights of racing?	time ? 1=<5: 2=5-20mn; 3=>20mn	total sleep duration ? 1=1 à 2h; 2= 2h-4h; 3=>4-6h ; 4= 6-8; 5=8-10; 6>10h	race time ? <30h =1; 30-40h = 2; 40-50h=3; 50-60h=4; 60-70=5; >70h=6; ab=abandon	nap location 1=ravitaillement 2=dehors	clock yes no		subject#	Do you have a particular strategy of sleep management during ultras?	Do you have a particular strategy of sleep management during ultras?	1= relaxation ;2 = micronaps(no duration) ; 3= micronaps <5min ;4 = 5-10min; 5 = 10-20 ; 6= 20 30 ; 7 = 30-1h; 8 = sleep episodel >1h; 9 = micronaps + sleep episode >1h; 10 = sleep when exhausted; 11 = Delay to next aid station; 12 = Resist pressure to sleep		subject#	Do you pay particularl attention to your sleep in the days and nights preceding an ultra?
[truncated: 636 more rows]
